# Supplementary material for: Incubation and Larval Development Durations of Sterlet (A. ruthenus LINNAEUS 1758) in River Water Rearing under Near-Natural Conditions
Source: MDPI journal article supplement (doi:10.3390/ecologies5020016), 2024-04-29
Supplement: s1 [file s1]

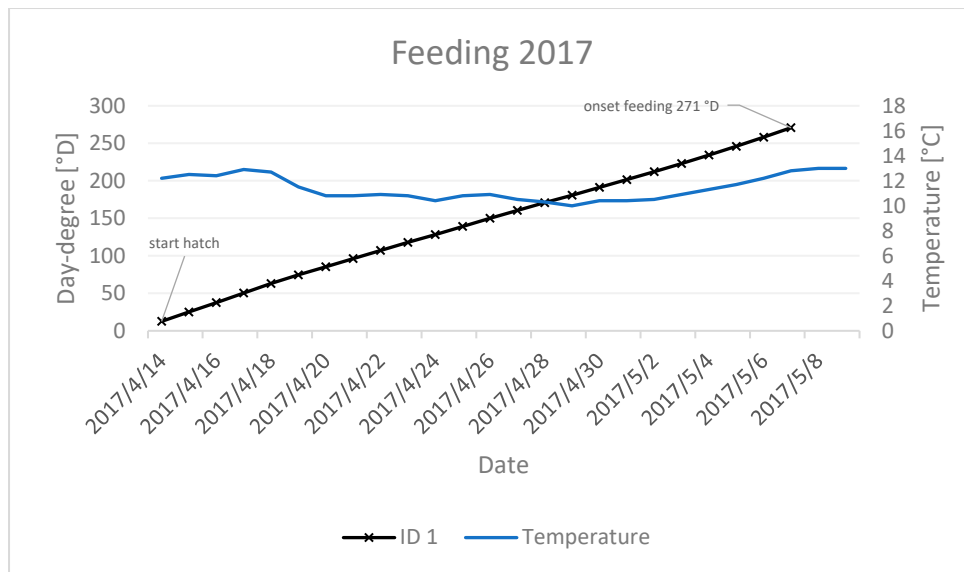

**Figure S1:** Duration from hatch until feeding in day-degrees [°D] in the year 2017

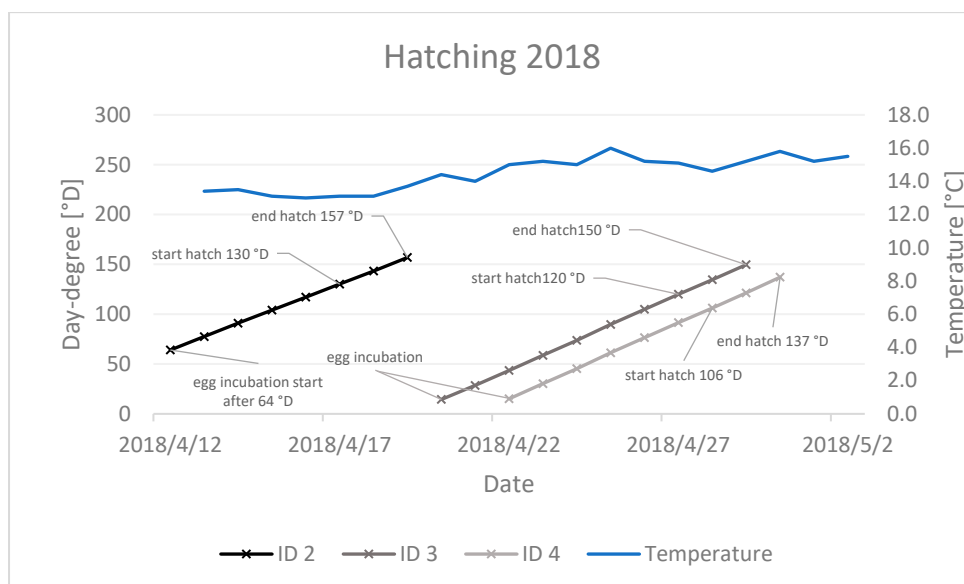

**Figure S2:** Duration from egg incubation until hatch in day-degrees [°D] in the year 2018

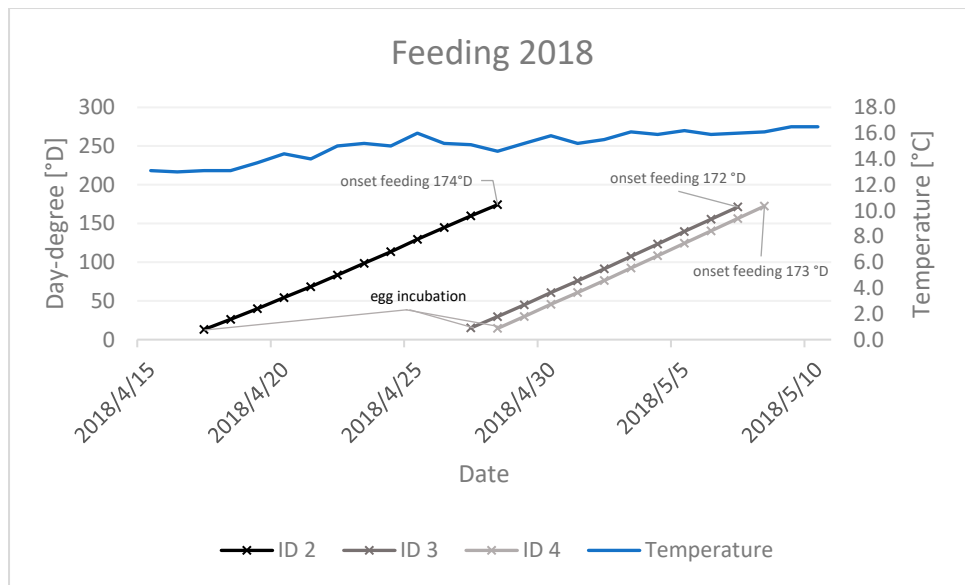

**Figure S3:** Duration from hatch until feeding in day-degrees [°D] in the year 2018

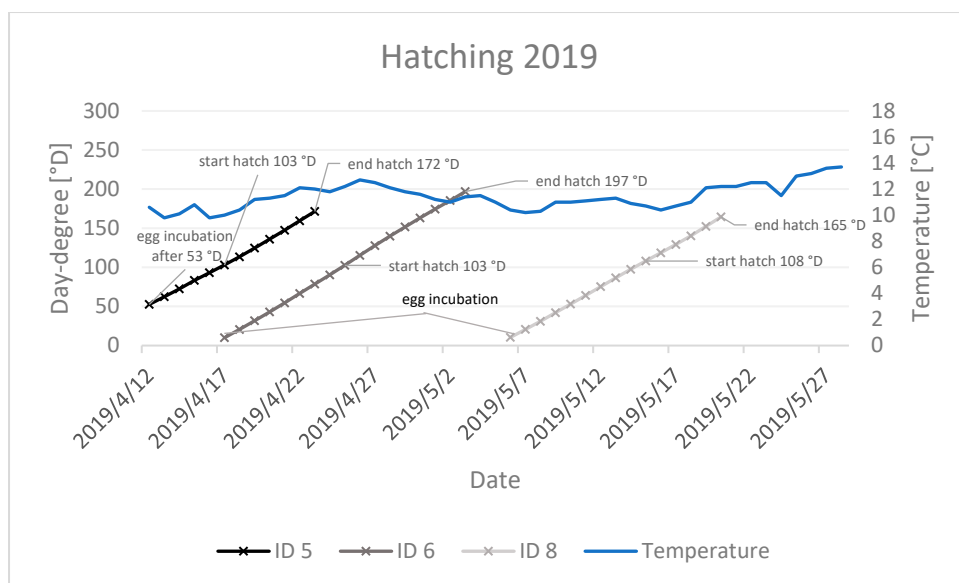

**Figure S4:** Duration from egg incubation until hatch in day-degrees [°D] in the year 2019

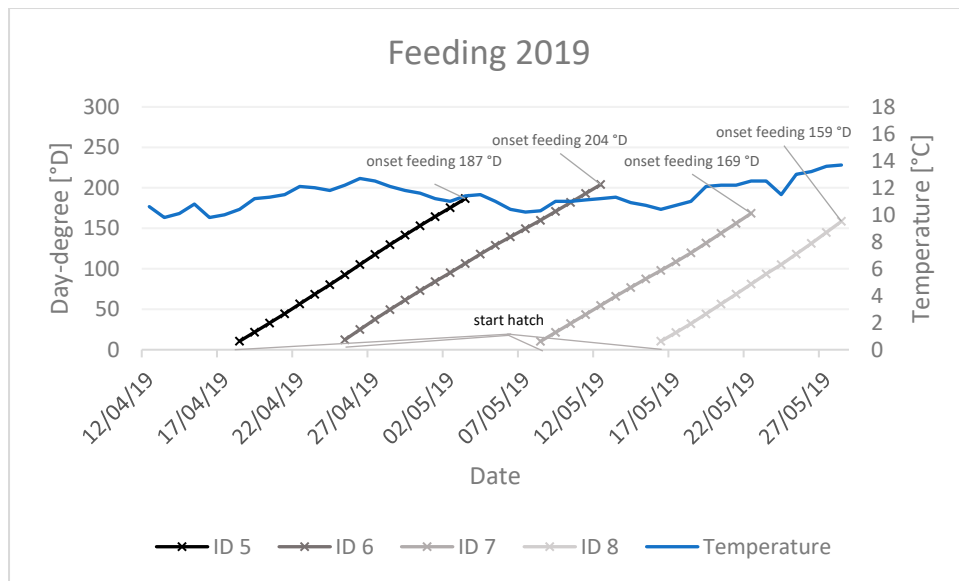

**Figure S5:** Duration from hatch until feeding in day-degrees [°D] in the year 2019

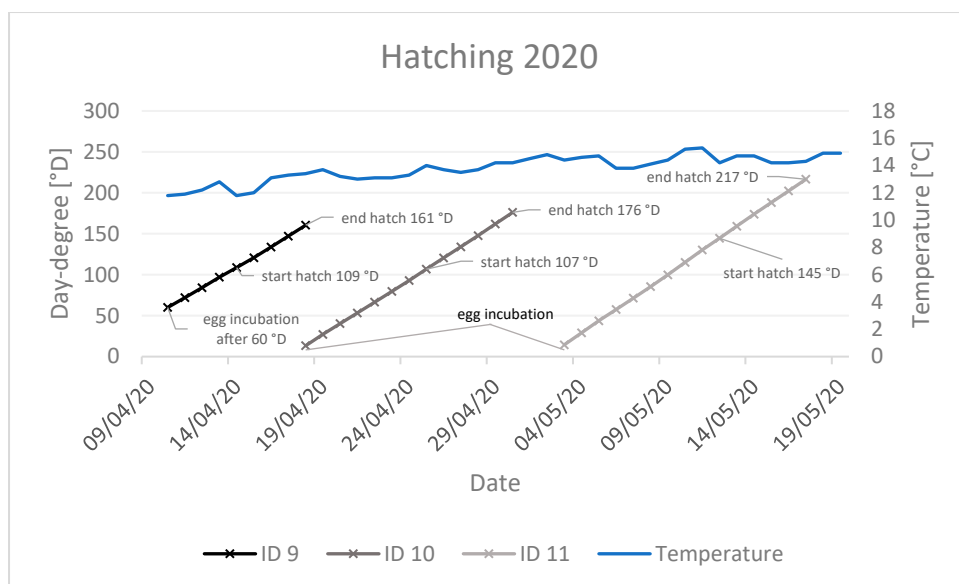

**Figure S6:** Duration from egg incubation until hatch in day-degrees [°D] in the year 2020

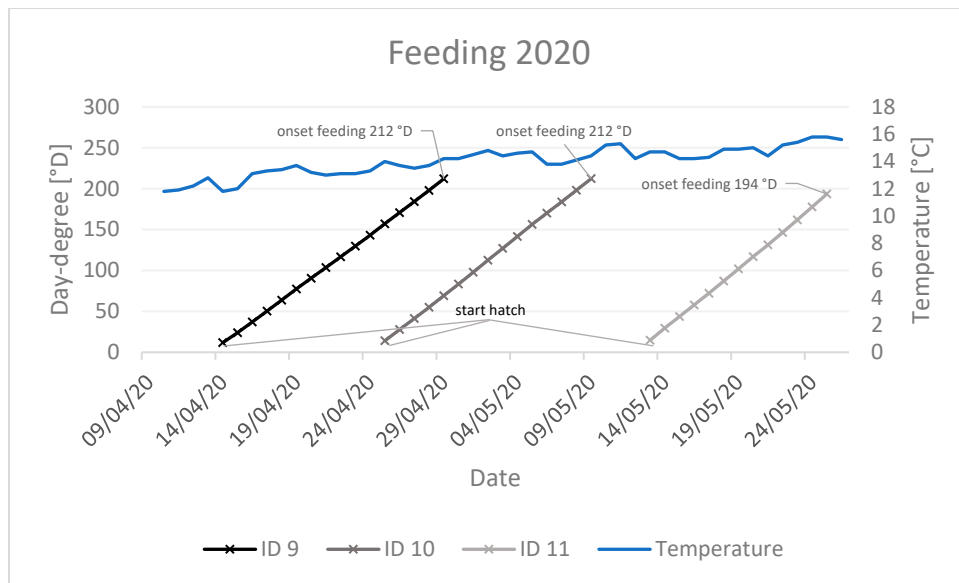

**Figure S7:** Duration from hatch until feeding in day-degrees [°D] in the year 2020

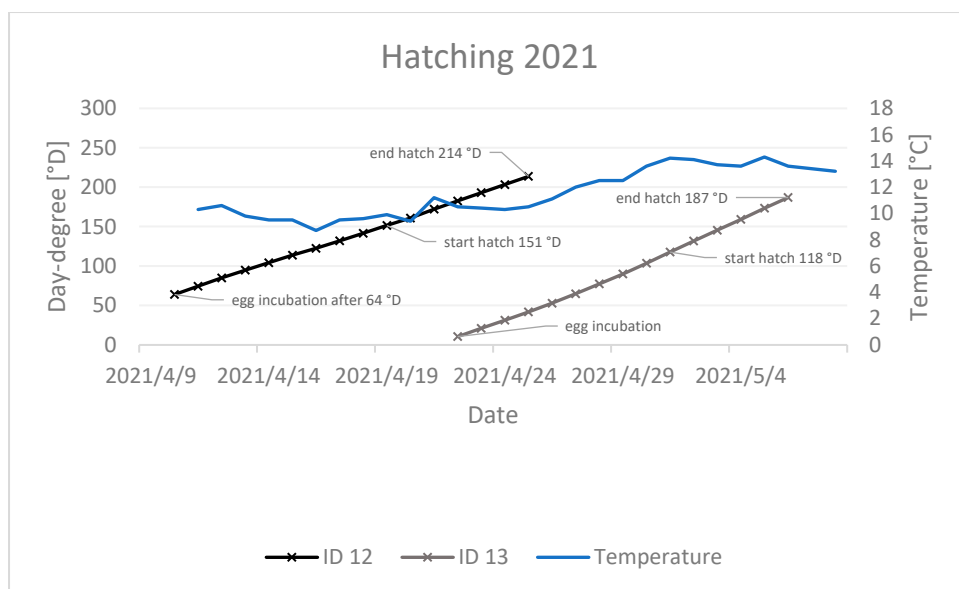

**Figure S8:** Duration from egg incubation until hatch in day-degrees [°D] in the year 2021

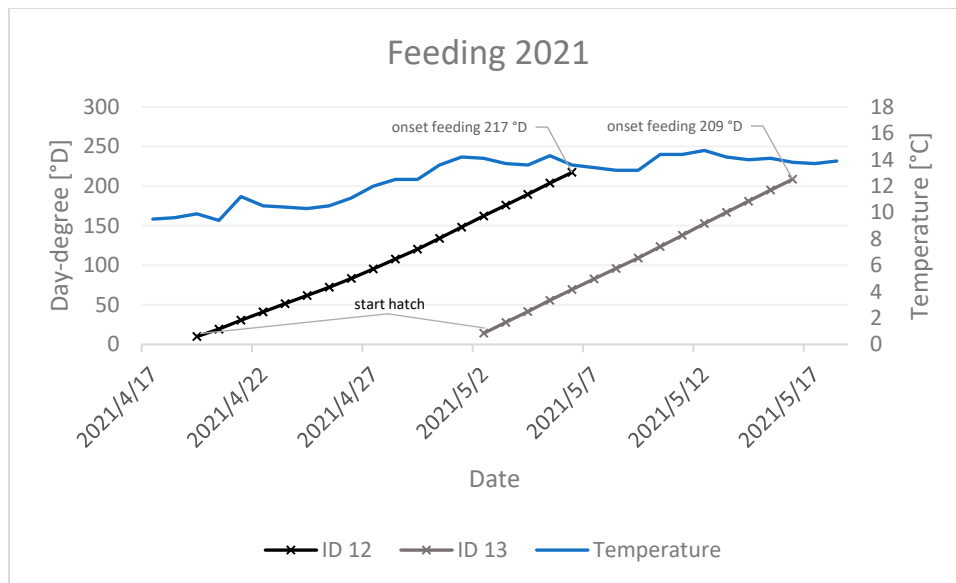

**Figure S9:** Duration from hatch until feeding in day-degrees [°D] in the year 2021

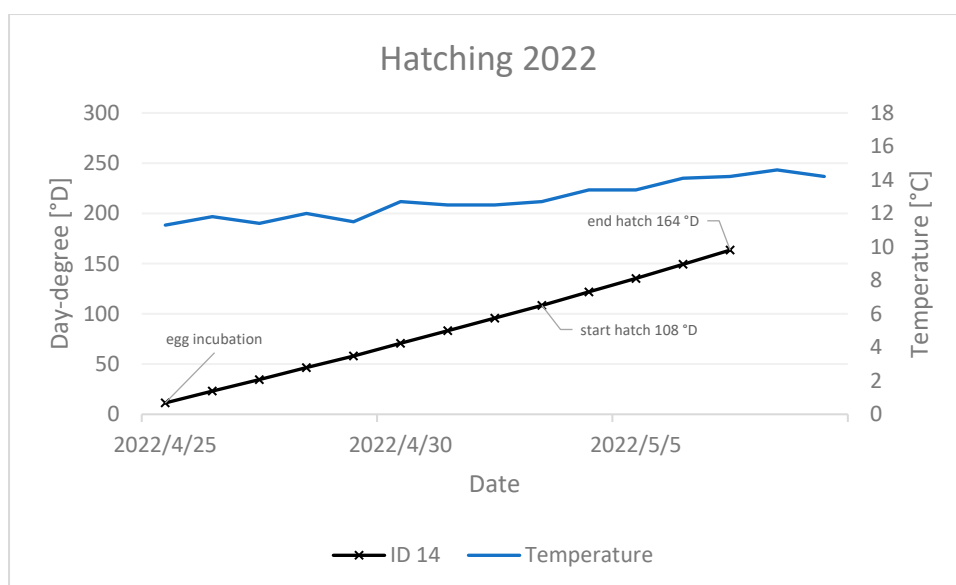

**Figure S10:** Duration from egg incubation until hatch in day-degrees [°D] in the year 2022

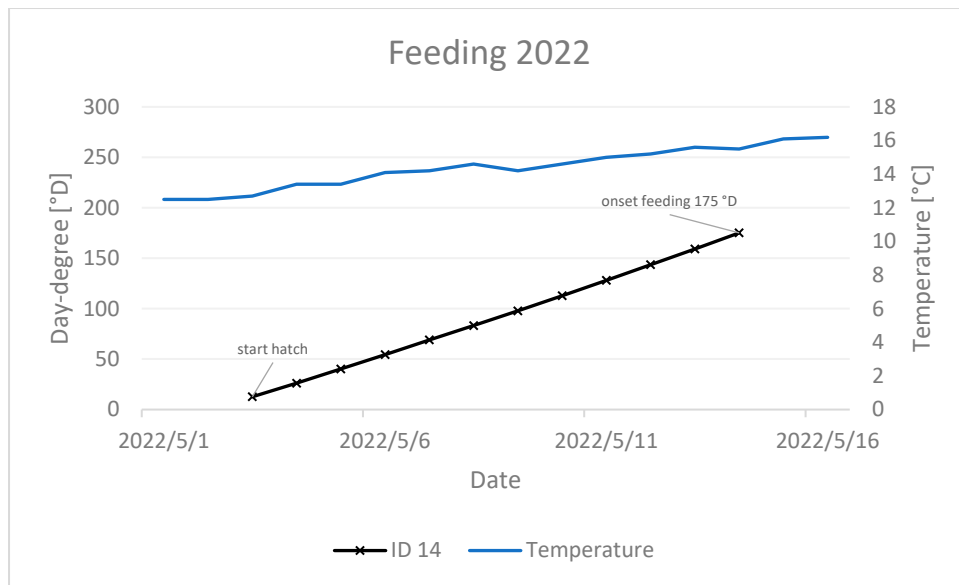

**Figure S11:** Duration from hatch until feeding in day-degrees [°D] in the year 2022

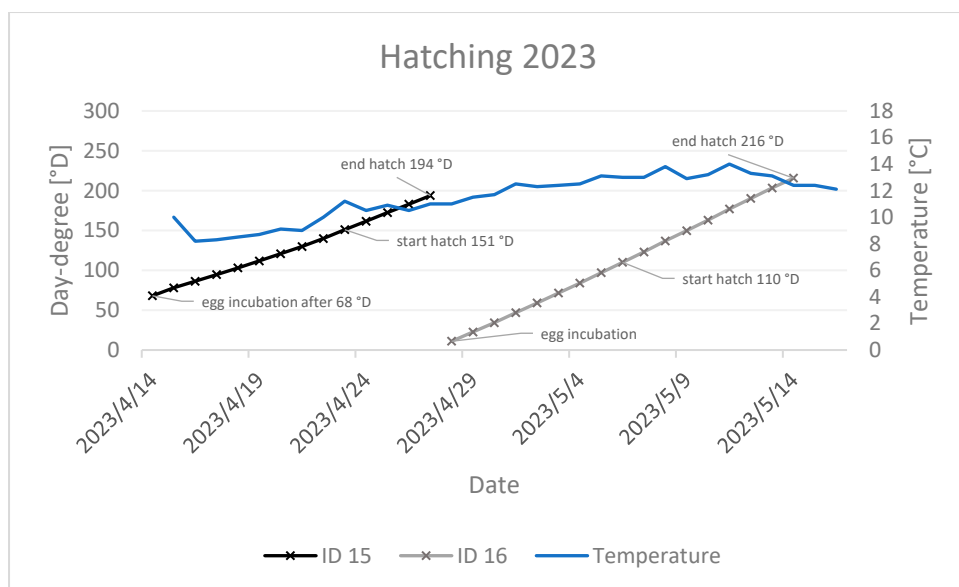

**Figure S12:** Duration from egg incubation until hatch in day-degrees [°D] in the year 2023

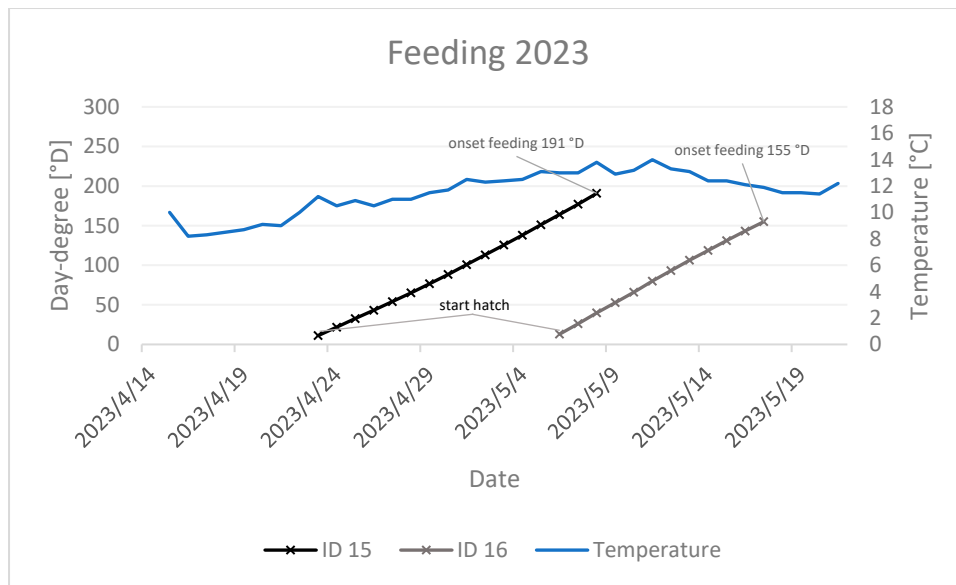

**Figure S13:** Duration from hatch until feeding in day-degrees [°D] in the year 2023

**Table S1:** Temperature measurements for the months April and May from 2017 to 2023 from the gauging station Wien-Nussdorf measured at an one hour interval. The data was provided by viadonau.

| Date       | Time     | Temperature [°C] |
|------------|----------|------------------|
| 01.04.2017 | 00:00:00 | 9,8              |
| 01.04.2017 | 01:00:00 | 9,9              |
| 01.04.2017 | 02:00:00 | 9,9              |
| 01.04.2017 | 03:00:00 | 9,9              |
| 01.04.2017 | 04:00:00 | 9,8              |
| 01.04.2017 | 05:00:00 | 9,8              |
| 01.04.2017 | 06:00:00 | 9,8              |
| 01.04.2017 | 07:00:00 | 9,8              |
| 01.04.2017 | 08:00:00 | 9,8              |
| 01.04.2017 | 09:00:00 | 10               |
| 01.04.2017 | 10:00:00 | 10,1             |
| 01.04.2017 | 11:00:00 | 10,2             |
| 01.04.2017 | 12:00:00 | 10,4             |
| 01.04.2017 | 13:00:00 | 10,4             |
| 01.04.2017 | 14:00:00 | 10,5             |
| 01.04.2017 | 15:00:00 | 10,5             |
| 01.04.2017 | 16:00:00 | 10,5             |
| 01.04.2017 | 17:00:00 | 10,5             |
| 01.04.2017 | 18:00:00 | 10,4             |
| 01.04.2017 | 19:00:00 | 10,3             |
| 01.04.2017 | 20:00:00 | 10,3             |
| 01.04.2017 | 21:00:00 | 10,2             |
| 01.04.2017 | 22:00:00 | 10,2             |
| 01.04.2017 | 23:00:00 | 10,3             |
| 02.04.2017 | 00:00:00 | 10,3             |
| 02.04.2017 | 01:00:00 | 10,4             |
| 02.04.2017 | 02:00:00 | 10,4             |
| 02.04.2017 | 03:00:00 | 10,4             |
| 02.04.2017 | 04:00:00 | 10,4             |
| 02.04.2017 | 05:00:00 | 10,3             |
| 02.04.2017 | 06:00:00 | 10,3             |
| 02.04.2017 | 07:00:00 | 10,3             |
| 02.04.2017 | 08:00:00 | 10,3             |
| 02.04.2017 | 09:00:00 | 10,5             |
| 02.04.2017 | 10:00:00 | 10,6             |
| 02.04.2017 | 11:00:00 | 10,7             |
| 02.04.2017 | 12:00:00 | 10,9             |
| 02.04.2017 | 13:00:00 | 10,8             |
| 02.04.2017 | 14:00:00 | 10,8             |
| 02.04.2017 | 15:00:00 | 10,8             |
| 02.04.2017 | 16:00:00 | 10,8             |



|            |          |      |
|------------|----------|------|
| 02.04.2017 | 17:00:00 | 10,8 |
| 02.04.2017 | 18:00:00 | 10,7 |
| 02.04.2017 | 19:00:00 | 10,7 |
| 02.04.2017 | 20:00:00 | 10,7 |
| 02.04.2017 | 21:00:00 | 10,7 |
| 02.04.2017 | 22:00:00 | 10,7 |
| 02.04.2017 | 23:00:00 | 10,7 |
| 03.04.2017 | 00:00:00 | 10,7 |
| 03.04.2017 | 01:00:00 | 10,7 |
| 03.04.2017 | 02:00:00 | 10,7 |
| 03.04.2017 | 03:00:00 | 10,8 |
| 03.04.2017 | 04:00:00 | 10,7 |
| 03.04.2017 | 05:00:00 | 10,7 |
| 03.04.2017 | 06:00:00 | 10,7 |
| 03.04.2017 | 07:00:00 | 10,7 |
| 03.04.2017 | 08:00:00 | 10,8 |
| 03.04.2017 | 09:00:00 | 10,9 |
| 03.04.2017 | 10:00:00 | 10,9 |
| 03.04.2017 | 11:00:00 | 11   |
| 03.04.2017 | 12:00:00 | 11,3 |
| 03.04.2017 | 13:00:00 | 11,2 |
| 03.04.2017 | 14:00:00 | 11,2 |
| 03.04.2017 | 15:00:00 | 11,2 |
| 03.04.2017 | 16:00:00 | 11,2 |
| 03.04.2017 | 17:00:00 | 11,2 |
| 03.04.2017 | 18:00:00 | 11,1 |
| 03.04.2017 | 19:00:00 | 11   |
| 03.04.2017 | 20:00:00 | 11   |
| 03.04.2017 | 21:00:00 | 11   |
| 03.04.2017 | 22:00:00 | 11   |
| 03.04.2017 | 23:00:00 | 11,1 |
| 04.04.2017 | 00:00:00 | 11,1 |
| 04.04.2017 | 01:00:00 | 11,1 |
| 04.04.2017 | 02:00:00 | 11,2 |
| 04.04.2017 | 03:00:00 | 11,2 |
| 04.04.2017 | 04:00:00 | 11,2 |
| 04.04.2017 | 05:00:00 | 11,2 |
| 04.04.2017 | 06:00:00 | 11,1 |
| 04.04.2017 | 07:00:00 | 11,1 |
| 04.04.2017 | 08:00:00 | 11,2 |
| 04.04.2017 | 09:00:00 | 11,2 |
| 04.04.2017 | 10:00:00 | 11,3 |
| 04.04.2017 | 11:00:00 | 11,5 |
| 04.04.2017 | 12:00:00 | 11,5 |
| 04.04.2017 | 13:00:00 | 11,6 |
| 04.04.2017 | 14:00:00 | 11,6 |

|            |          |      |
|------------|----------|------|
| 04.04.2017 | 15:00:00 | 11,6 |
| 04.04.2017 | 16:00:00 | 11,5 |
| 04.04.2017 | 17:00:00 | 11,4 |
| 04.04.2017 | 18:00:00 | 11,3 |
| 04.04.2017 | 19:00:00 | 11,2 |
| 04.04.2017 | 20:00:00 | 11,2 |
| 04.04.2017 | 21:00:00 | 11,2 |
| 04.04.2017 | 22:00:00 | 11,2 |
| 04.04.2017 | 23:00:00 | 11,2 |
| 05.04.2017 | 00:00:00 | 11,2 |
| 05.04.2017 | 01:00:00 | 11,3 |
| 05.04.2017 | 02:00:00 | 11,3 |
| 05.04.2017 | 03:00:00 | 11,3 |
| 05.04.2017 | 04:00:00 | 11,3 |
| 05.04.2017 | 05:00:00 | 11,3 |
| 05.04.2017 | 06:00:00 | 11,3 |
| 05.04.2017 | 07:00:00 | 11,3 |
| 05.04.2017 | 08:00:00 | 11,3 |
| 05.04.2017 | 09:00:00 | 11,3 |
| 05.04.2017 | 10:00:00 | 11,3 |
| 05.04.2017 | 11:00:00 | 11,3 |
| 05.04.2017 | 12:00:00 | 11,4 |
| 05.04.2017 | 13:00:00 | 11,4 |
| 05.04.2017 | 14:00:00 | 11,5 |
| 05.04.2017 | 15:00:00 | 11,5 |
| 05.04.2017 | 16:00:00 | 11,6 |
| 05.04.2017 | 17:00:00 | 11,6 |
| 05.04.2017 | 18:00:00 | 11,5 |
| 05.04.2017 | 19:00:00 | 11,4 |
| 05.04.2017 | 20:00:00 | 11,4 |
| 05.04.2017 | 21:00:00 | 11,4 |
| 05.04.2017 | 22:00:00 | 11,4 |
| 05.04.2017 | 23:00:00 | 11,4 |
| 06.04.2017 | 00:00:00 | 11,5 |
| 06.04.2017 | 01:00:00 | 11,4 |
| 06.04.2017 | 02:00:00 | 11,4 |
| 06.04.2017 | 03:00:00 | 11,3 |
| 06.04.2017 | 04:00:00 | 11,3 |
| 06.04.2017 | 05:00:00 | 11,3 |
| 06.04.2017 | 06:00:00 | 11,2 |
| 06.04.2017 | 07:00:00 | 11,3 |
| 06.04.2017 | 08:00:00 | 11,3 |
| 06.04.2017 | 09:00:00 | 11,3 |
| 06.04.2017 | 10:00:00 | 11,3 |
| 06.04.2017 | 11:00:00 | 11,4 |
| 06.04.2017 | 12:00:00 | 11,4 |

|            |          |      |
|------------|----------|------|
| 06.04.2017 | 13:00:00 | 11,3 |
| 06.04.2017 | 14:00:00 | 11,3 |
| 06.04.2017 | 15:00:00 | 11,3 |
| 06.04.2017 | 16:00:00 | 11,2 |
| 06.04.2017 | 17:00:00 | 11,2 |
| 06.04.2017 | 18:00:00 | 11,2 |
| 06.04.2017 | 19:00:00 | 11,1 |
| 06.04.2017 | 20:00:00 | 11,1 |
| 06.04.2017 | 21:00:00 | 11,1 |
| 06.04.2017 | 22:00:00 | 11,1 |
| 06.04.2017 | 23:00:00 | 11,1 |
| 07.04.2017 | 00:00:00 | 11,1 |
| 07.04.2017 | 01:00:00 | 11,1 |
| 07.04.2017 | 02:00:00 | 11,1 |
| 07.04.2017 | 03:00:00 | 11,1 |
| 07.04.2017 | 04:00:00 | 11,1 |
| 07.04.2017 | 05:00:00 | 11   |
| 07.04.2017 | 06:00:00 | 11   |
| 07.04.2017 | 07:00:00 | 11   |
| 07.04.2017 | 08:00:00 | 11   |
| 07.04.2017 | 09:00:00 | 11   |
| 07.04.2017 | 10:00:00 | 11   |
| 07.04.2017 | 11:00:00 | 11   |
| 07.04.2017 | 12:00:00 | 11   |
| 07.04.2017 | 13:00:00 | 11   |
| 07.04.2017 | 14:00:00 | 10,9 |
| 07.04.2017 | 15:00:00 | 10,9 |
| 07.04.2017 | 16:00:00 | 10,9 |
| 07.04.2017 | 17:00:00 | 10,9 |
| 07.04.2017 | 18:00:00 | 10,8 |
| 07.04.2017 | 19:00:00 | 10,8 |
| 07.04.2017 | 20:00:00 | 10,8 |
| 07.04.2017 | 21:00:00 | 10,8 |
| 07.04.2017 | 22:00:00 | 10,8 |
| 07.04.2017 | 23:00:00 | 10,9 |
| 08.04.2017 | 00:00:00 | 10,9 |
| 08.04.2017 | 01:00:00 | 10,9 |
| 08.04.2017 | 02:00:00 | 10,9 |
| 08.04.2017 | 03:00:00 | 10,9 |
| 08.04.2017 | 04:00:00 | 10,9 |
| 08.04.2017 | 05:00:00 | 10,9 |
| 08.04.2017 | 06:00:00 | 10,9 |
| 08.04.2017 | 07:00:00 | 10,9 |
| 08.04.2017 | 08:00:00 | 10,9 |
| 08.04.2017 | 09:00:00 | 10,9 |
| 08.04.2017 | 10:00:00 | 11   |

|            |          |      |
|------------|----------|------|
| 08.04.2017 | 11:00:00 | 11,1 |
| 08.04.2017 | 12:00:00 | 11,2 |
| 08.04.2017 | 13:00:00 | 11,2 |
| 08.04.2017 | 14:00:00 | 11,3 |
| 08.04.2017 | 15:00:00 | 11,3 |
| 08.04.2017 | 16:00:00 | 11,2 |
| 08.04.2017 | 17:00:00 | 11,1 |
| 08.04.2017 | 18:00:00 | 11   |
| 08.04.2017 | 19:00:00 | 11   |
| 08.04.2017 | 20:00:00 | 10,9 |
| 08.04.2017 | 21:00:00 | 10,9 |
| 08.04.2017 | 22:00:00 | 10,9 |
| 08.04.2017 | 23:00:00 | 10,9 |
| 09.04.2017 | 00:00:00 | 10,9 |
| 09.04.2017 | 01:00:00 | 10,9 |
| 09.04.2017 | 02:00:00 | 10,9 |
| 09.04.2017 | 03:00:00 | 10,8 |
| 09.04.2017 | 04:00:00 | 10,9 |
| 09.04.2017 | 05:00:00 | 10,8 |
| 09.04.2017 | 06:00:00 | 10,8 |
| 09.04.2017 | 07:00:00 | 10,8 |
| 09.04.2017 | 08:00:00 | 10,9 |
| 09.04.2017 | 09:00:00 | 11   |
| 09.04.2017 | 10:00:00 | 11,2 |
| 09.04.2017 | 11:00:00 | 11,3 |
| 09.04.2017 | 12:00:00 | 11,4 |
| 09.04.2017 | 13:00:00 | 11,5 |
| 09.04.2017 | 14:00:00 | 11,5 |
| 09.04.2017 | 15:00:00 | 11,5 |
| 09.04.2017 | 16:00:00 | 11,5 |
| 09.04.2017 | 17:00:00 | 11,4 |
| 09.04.2017 | 18:00:00 | 11,3 |
| 09.04.2017 | 19:00:00 | 11,2 |
| 09.04.2017 | 20:00:00 | 11,1 |
| 09.04.2017 | 21:00:00 | 11,1 |
| 09.04.2017 | 22:00:00 | 11   |
| 09.04.2017 | 23:00:00 | 11   |
| 10.04.2017 | 00:00:00 | 11   |
| 10.04.2017 | 01:00:00 | 11   |
| 10.04.2017 | 02:00:00 | 11   |
| 10.04.2017 | 03:00:00 | 11   |
| 10.04.2017 | 04:00:00 | 11,1 |
| 10.04.2017 | 05:00:00 | 11,1 |
| 10.04.2017 | 06:00:00 | 11,1 |
| 10.04.2017 | 07:00:00 | 11,1 |
| 10.04.2017 | 08:00:00 | 11,3 |

|            |          |      |
|------------|----------|------|
| 10.04.2017 | 09:00:00 | 11,4 |
| 10.04.2017 | 10:00:00 | 11,6 |
| 10.04.2017 | 11:00:00 | 11,7 |
| 10.04.2017 | 12:00:00 | 11,8 |
| 10.04.2017 | 13:00:00 | 11,8 |
| 10.04.2017 | 14:00:00 | 11,8 |
| 10.04.2017 | 15:00:00 | 11,8 |
| 10.04.2017 | 16:00:00 | 11,8 |
| 10.04.2017 | 17:00:00 | 11,8 |
| 10.04.2017 | 18:00:00 | 11,7 |
| 10.04.2017 | 19:00:00 | 11,6 |
| 10.04.2017 | 20:00:00 | 11,6 |
| 10.04.2017 | 21:00:00 | 11,5 |
| 10.04.2017 | 22:00:00 | 11,5 |
| 10.04.2017 | 23:00:00 | 11,5 |
| 11.04.2017 | 00:00:00 | 11,5 |
| 11.04.2017 | 01:00:00 | 11,5 |
| 11.04.2017 | 02:00:00 | 11,6 |
| 11.04.2017 | 03:00:00 | 11,7 |
| 11.04.2017 | 04:00:00 | 11,8 |
| 11.04.2017 | 05:00:00 | 11,8 |
| 11.04.2017 | 06:00:00 | 11,9 |
| 11.04.2017 | 07:00:00 | 11,9 |
| 11.04.2017 | 08:00:00 | 11,9 |
| 11.04.2017 | 09:00:00 | 11,9 |
| 11.04.2017 | 10:00:00 | 11,9 |
| 11.04.2017 | 11:00:00 | 11,9 |
| 11.04.2017 | 12:00:00 | 11,9 |
| 11.04.2017 | 13:00:00 | 11,8 |
| 11.04.2017 | 14:00:00 | 11,8 |
| 11.04.2017 | 15:00:00 | 11,7 |
| 11.04.2017 | 16:00:00 | 11,7 |
| 11.04.2017 | 17:00:00 | 11,7 |
| 11.04.2017 | 18:00:00 | 11,7 |
| 11.04.2017 | 19:00:00 | 11,6 |
| 11.04.2017 | 20:00:00 | 11,6 |
| 11.04.2017 | 21:00:00 | 11,6 |
| 11.04.2017 | 22:00:00 | 11,6 |
| 11.04.2017 | 23:00:00 | 11,6 |
| 12.04.2017 | 00:00:00 | 11,6 |
| 12.04.2017 | 01:00:00 | 11,6 |
| 12.04.2017 | 02:00:00 | 11,7 |
| 12.04.2017 | 03:00:00 | 11,8 |
| 12.04.2017 | 04:00:00 | 11,8 |
| 12.04.2017 | 05:00:00 | 11,8 |
| 12.04.2017 | 06:00:00 | 11,9 |

|            |          |      |
|------------|----------|------|
| 12.04.2017 | 07:00:00 | 11,9 |
| 12.04.2017 | 08:00:00 | 11,9 |
| 12.04.2017 | 09:00:00 | 11,9 |
| 12.04.2017 | 10:00:00 | 12   |
| 12.04.2017 | 11:00:00 | 12   |
| 12.04.2017 | 12:00:00 | 12,3 |
| 12.04.2017 | 13:00:00 | 12,1 |
| 12.04.2017 | 14:00:00 | 12,2 |
| 12.04.2017 | 15:00:00 | 12,1 |
| 12.04.2017 | 16:00:00 | 12   |
| 12.04.2017 | 17:00:00 | 12   |
| 12.04.2017 | 18:00:00 | 12   |
| 12.04.2017 | 19:00:00 | 12   |
| 12.04.2017 | 20:00:00 | 11,9 |
| 12.04.2017 | 21:00:00 | 11,8 |
| 12.04.2017 | 22:00:00 | 11,8 |
| 12.04.2017 | 23:00:00 | 11,7 |
| 13.04.2017 | 00:00:00 | 11,7 |
| 13.04.2017 | 01:00:00 | 11,7 |
| 13.04.2017 | 02:00:00 | 11,7 |
| 13.04.2017 | 03:00:00 | 11,7 |
| 13.04.2017 | 04:00:00 | 11,7 |
| 13.04.2017 | 05:00:00 | 11,7 |
| 13.04.2017 | 06:00:00 | 11,7 |
| 13.04.2017 | 07:00:00 | 11,7 |
| 13.04.2017 | 08:00:00 | 11,7 |
| 13.04.2017 | 09:00:00 | 11,7 |
| 13.04.2017 | 10:00:00 | 11,7 |
| 13.04.2017 | 11:00:00 | 11,7 |
| 13.04.2017 | 12:00:00 | 11,7 |
| 13.04.2017 | 13:00:00 | 11,7 |
| 13.04.2017 | 14:00:00 | 11,8 |
| 13.04.2017 | 15:00:00 | 11,7 |
| 13.04.2017 | 16:00:00 | 11,8 |
| 13.04.2017 | 17:00:00 | 11,7 |
| 13.04.2017 | 18:00:00 | 11,7 |
| 13.04.2017 | 19:00:00 | 11,6 |
| 13.04.2017 | 20:00:00 | 11,6 |
| 13.04.2017 | 21:00:00 | 11,6 |
| 13.04.2017 | 22:00:00 | 11,6 |
| 13.04.2017 | 23:00:00 | 11,6 |
| 14.04.2017 | 00:00:00 | 11,6 |
| 14.04.2017 | 01:00:00 | 11,6 |
| 14.04.2017 | 02:00:00 | 11,6 |
| 14.04.2017 | 03:00:00 | 11,6 |
| 14.04.2017 | 04:00:00 | 11,7 |

|            |          |      |
|------------|----------|------|
| 14.04.2017 | 05:00:00 | 11,7 |
| 14.04.2017 | 06:00:00 | 11,7 |
| 14.04.2017 | 07:00:00 | 11,7 |
| 14.04.2017 | 08:00:00 | 11,7 |
| 14.04.2017 | 09:00:00 | 11,8 |
| 14.04.2017 | 10:00:00 | 11,9 |
| 14.04.2017 | 11:00:00 | 12,1 |
| 14.04.2017 | 12:00:00 | 12   |
| 14.04.2017 | 13:00:00 | 11,9 |
| 14.04.2017 | 14:00:00 | 11,9 |
| 14.04.2017 | 15:00:00 | 11,8 |
| 14.04.2017 | 16:00:00 | 11,8 |
| 14.04.2017 | 17:00:00 | 11,7 |
| 14.04.2017 | 18:00:00 | 11,7 |
| 14.04.2017 | 19:00:00 | 11,7 |
| 14.04.2017 | 20:00:00 | 11,6 |
| 14.04.2017 | 21:00:00 | 11,6 |
| 14.04.2017 | 22:00:00 | 11,5 |
| 14.04.2017 | 23:00:00 | 11,5 |
| 15.04.2017 | 00:00:00 | 11,4 |
| 15.04.2017 | 01:00:00 | 11,4 |
| 15.04.2017 | 02:00:00 | 11,4 |
| 15.04.2017 | 03:00:00 | 11,4 |
| 15.04.2017 | 04:00:00 | 11,4 |
| 15.04.2017 | 05:00:00 | 11,4 |
| 15.04.2017 | 06:00:00 | 11,5 |
| 15.04.2017 | 07:00:00 | 11,5 |
| 15.04.2017 | 08:00:00 | 11,5 |
| 15.04.2017 | 09:00:00 | 11,5 |
| 15.04.2017 | 10:00:00 | 11,5 |
| 15.04.2017 | 11:00:00 | 11,6 |
| 15.04.2017 | 12:00:00 | 11,6 |
| 15.04.2017 | 13:00:00 | 11,6 |
| 15.04.2017 | 14:00:00 | 11,7 |
| 15.04.2017 | 15:00:00 | 11,6 |
| 15.04.2017 | 16:00:00 | 11,6 |
| 15.04.2017 | 17:00:00 | 11,6 |
| 15.04.2017 | 18:00:00 | 11,6 |
| 15.04.2017 | 19:00:00 | 11,5 |
| 15.04.2017 | 20:00:00 | 11,5 |
| 15.04.2017 | 21:00:00 | 11,5 |
| 15.04.2017 | 22:00:00 | 11,4 |
| 15.04.2017 | 23:00:00 | 11,4 |
| 16.04.2017 | 00:00:00 | 11,4 |
| 16.04.2017 | 01:00:00 | 11,4 |
| 16.04.2017 | 02:00:00 | 11,4 |

|            |          |      |
|------------|----------|------|
| 16.04.2017 | 03:00:00 | 11,4 |
| 16.04.2017 | 04:00:00 | 11,4 |
| 16.04.2017 | 05:00:00 | 11,4 |
| 16.04.2017 | 06:00:00 | 11,4 |
| 16.04.2017 | 07:00:00 | 11,4 |
| 16.04.2017 | 08:00:00 | 11,5 |
| 16.04.2017 | 09:00:00 | 11,6 |
| 16.04.2017 | 10:00:00 | 11,8 |
| 16.04.2017 | 11:00:00 | 11,9 |
| 16.04.2017 | 12:00:00 | 11,9 |
| 16.04.2017 | 13:00:00 | 12   |
| 16.04.2017 | 14:00:00 | 12   |
| 16.04.2017 | 15:00:00 | 12   |
| 16.04.2017 | 16:00:00 | 11,9 |
| 16.04.2017 | 17:00:00 | 11,8 |
| 16.04.2017 | 18:00:00 | 11,7 |
| 16.04.2017 | 19:00:00 | 11,7 |
| 16.04.2017 | 20:00:00 | 11,6 |
| 16.04.2017 | 21:00:00 | 11,5 |
| 16.04.2017 | 22:00:00 | 11,4 |
| 16.04.2017 | 23:00:00 | 11,5 |
| 17.04.2017 | 00:00:00 | 11,5 |
| 17.04.2017 | 01:00:00 | 11,4 |
| 17.04.2017 | 02:00:00 | 11,4 |
| 17.04.2017 | 03:00:00 | 11,4 |
| 17.04.2017 | 04:00:00 | 11,4 |
| 17.04.2017 | 05:00:00 | 11,4 |
| 17.04.2017 | 06:00:00 | 11,4 |
| 17.04.2017 | 07:00:00 | 11,5 |
| 17.04.2017 | 08:00:00 | 11,6 |
| 17.04.2017 | 09:00:00 | 11,7 |
| 17.04.2017 | 10:00:00 | 11,8 |
| 17.04.2017 | 11:00:00 | 11,8 |
| 17.04.2017 | 12:00:00 | 11,6 |
| 17.04.2017 | 13:00:00 | 11,9 |
| 17.04.2017 | 14:00:00 | 11,9 |
| 17.04.2017 | 15:00:00 | 11,9 |
| 17.04.2017 | 16:00:00 | 11,9 |
| 17.04.2017 | 17:00:00 | 11,9 |
| 17.04.2017 | 18:00:00 | 11,8 |
| 17.04.2017 | 19:00:00 | 11,7 |
| 17.04.2017 | 20:00:00 | 11,6 |
| 17.04.2017 | 21:00:00 | 11,6 |
| 17.04.2017 | 22:00:00 | 11,4 |
| 17.04.2017 | 23:00:00 | 11,5 |
| 18.04.2017 | 00:00:00 | 11,4 |



|            |          |      |
|------------|----------|------|
| 18.04.2017 | 01:00:00 | 11,4 |
| 18.04.2017 | 02:00:00 | 11,4 |
| 18.04.2017 | 03:00:00 | 11,4 |
| 18.04.2017 | 04:00:00 | 11,4 |
| 18.04.2017 | 05:00:00 | 11,4 |
| 18.04.2017 | 06:00:00 | 11,4 |
| 18.04.2017 | 07:00:00 | 11,5 |
| 18.04.2017 | 08:00:00 | 11,5 |
| 18.04.2017 | 09:00:00 | 11,6 |
| 18.04.2017 | 10:00:00 | 11,6 |
| 18.04.2017 | 11:00:00 | 11,7 |
| 18.04.2017 | 12:00:00 | 11,8 |
| 18.04.2017 | 13:00:00 | 11,8 |
| 18.04.2017 | 14:00:00 | 11,8 |
| 18.04.2017 | 15:00:00 | 11,8 |
| 18.04.2017 | 16:00:00 | 11,8 |
| 18.04.2017 | 17:00:00 | 11,6 |
| 18.04.2017 | 18:00:00 | 11,6 |
| 18.04.2017 | 19:00:00 | 11,4 |
| 18.04.2017 | 20:00:00 | 11,4 |
| 18.04.2017 | 21:00:00 | 11,3 |
| 18.04.2017 | 22:00:00 | 11,3 |
| 18.04.2017 | 23:00:00 | 11,3 |
| 19.04.2017 | 00:00:00 | 11,2 |
| 19.04.2017 | 01:00:00 | 11,2 |
| 19.04.2017 | 02:00:00 | 11,2 |
| 19.04.2017 | 03:00:00 | 11,1 |
| 19.04.2017 | 04:00:00 | 11,1 |
| 19.04.2017 | 05:00:00 | 11   |
| 19.04.2017 | 06:00:00 | 10,9 |
| 19.04.2017 | 07:00:00 | 10,9 |
| 19.04.2017 | 08:00:00 | 10,8 |
| 19.04.2017 | 09:00:00 | 10,7 |
| 19.04.2017 | 10:00:00 | 10,7 |
| 19.04.2017 | 11:00:00 | 10,7 |
| 19.04.2017 | 12:00:00 | 10,7 |
| 19.04.2017 | 13:00:00 | 10,6 |
| 19.04.2017 | 14:00:00 | 10,6 |
| 19.04.2017 | 15:00:00 | 10,6 |
| 19.04.2017 | 16:00:00 | 10,5 |
| 19.04.2017 | 17:00:00 | 10,4 |
| 19.04.2017 | 18:00:00 | 10,4 |
| 19.04.2017 | 19:00:00 | 10,3 |
| 19.04.2017 | 20:00:00 | 10,4 |
| 19.04.2017 | 21:00:00 | 10,4 |
| 19.04.2017 | 22:00:00 | 10,4 |

|            |          |      |
|------------|----------|------|
| 19.04.2017 | 23:00:00 | 10,4 |
| 20.04.2017 | 00:00:00 | 10,3 |
| 20.04.2017 | 01:00:00 | 10,2 |
| 20.04.2017 | 02:00:00 | 10,1 |
| 20.04.2017 | 03:00:00 | 10   |
| 20.04.2017 | 04:00:00 | 9,9  |
| 20.04.2017 | 05:00:00 | 9,8  |
| 20.04.2017 | 06:00:00 | 9,8  |
| 20.04.2017 | 07:00:00 | 9,7  |
| 20.04.2017 | 08:00:00 | 9,6  |
| 20.04.2017 | 09:00:00 | 9,6  |
| 20.04.2017 | 10:00:00 | 9,6  |
| 20.04.2017 | 11:00:00 | 9,6  |
| 20.04.2017 | 12:00:00 | 9,6  |
| 20.04.2017 | 13:00:00 | 9,6  |
| 20.04.2017 | 14:00:00 | 9,7  |
| 20.04.2017 | 15:00:00 | 9,7  |
| 20.04.2017 | 16:00:00 | 9,6  |
| 20.04.2017 | 17:00:00 | 9,6  |
| 20.04.2017 | 18:00:00 | 9,6  |
| 20.04.2017 | 19:00:00 | 9,6  |
| 20.04.2017 | 20:00:00 | 9,5  |
| 20.04.2017 | 21:00:00 | 9,5  |
| 20.04.2017 | 22:00:00 | 9,5  |
| 20.04.2017 | 23:00:00 | 9,5  |
| 21.04.2017 | 00:00:00 | 9,5  |
| 21.04.2017 | 01:00:00 | 9,5  |
| 21.04.2017 | 02:00:00 | 9,5  |
| 21.04.2017 | 03:00:00 | 9,4  |
| 21.04.2017 | 04:00:00 | 9,3  |
| 21.04.2017 | 05:00:00 | 9,4  |
| 21.04.2017 | 06:00:00 | 9,4  |
| 21.04.2017 | 07:00:00 | 9,4  |
| 21.04.2017 | 08:00:00 | 9,5  |
| 21.04.2017 | 09:00:00 | 9,6  |
| 21.04.2017 | 10:00:00 | 9,6  |
| 21.04.2017 | 11:00:00 | 9,9  |
| 21.04.2017 | 12:00:00 | 9,9  |
| 21.04.2017 | 13:00:00 | 9,9  |
| 21.04.2017 | 14:00:00 | 9,9  |
| 21.04.2017 | 15:00:00 | 10   |
| 21.04.2017 | 16:00:00 | 9,9  |
| 21.04.2017 | 17:00:00 | 9,9  |
| 21.04.2017 | 18:00:00 | 9,9  |
| 21.04.2017 | 19:00:00 | 9,7  |
| 21.04.2017 | 20:00:00 | 9,7  |

|            |          |     |
|------------|----------|-----|
| 21.04.2017 | 21:00:00 | 9,7 |
| 21.04.2017 | 22:00:00 | 9,6 |
| 21.04.2017 | 23:00:00 | 9,6 |
| 22.04.2017 | 00:00:00 | 9,6 |
| 22.04.2017 | 01:00:00 | 9,6 |
| 22.04.2017 | 02:00:00 | 9,6 |
| 22.04.2017 | 03:00:00 | 9,6 |
| 22.04.2017 | 04:00:00 | 9,6 |
| 22.04.2017 | 05:00:00 | 9,6 |
| 22.04.2017 | 06:00:00 | 9,5 |
| 22.04.2017 | 07:00:00 | 9,5 |
| 22.04.2017 | 08:00:00 | 9,5 |
| 22.04.2017 | 09:00:00 | 9,5 |
| 22.04.2017 | 10:00:00 | 9,6 |
| 22.04.2017 | 11:00:00 | 9,6 |
| 22.04.2017 | 12:00:00 | 9,6 |
| 22.04.2017 | 13:00:00 | 9,7 |
| 22.04.2017 | 14:00:00 | 9,7 |
| 22.04.2017 | 15:00:00 | 9,7 |
| 22.04.2017 | 16:00:00 | 9,7 |
| 22.04.2017 | 17:00:00 | 9,6 |
| 22.04.2017 | 18:00:00 | 9,5 |
| 22.04.2017 | 19:00:00 | 9,5 |
| 22.04.2017 | 20:00:00 | 9,5 |
| 22.04.2017 | 21:00:00 | 9,5 |
| 22.04.2017 | 22:00:00 | 9,4 |
| 22.04.2017 | 23:00:00 | 9,5 |
| 23.04.2017 | 00:00:00 | 9,5 |
| 23.04.2017 | 01:00:00 | 9,5 |
| 23.04.2017 | 02:00:00 | 9,5 |
| 23.04.2017 | 03:00:00 | 9,5 |
| 23.04.2017 | 04:00:00 | 9,5 |
| 23.04.2017 | 05:00:00 | 9,5 |
| 23.04.2017 | 06:00:00 | 9,4 |
| 23.04.2017 | 07:00:00 | 9,4 |
| 23.04.2017 | 08:00:00 | 9,4 |
| 23.04.2017 | 09:00:00 | 9,4 |
| 23.04.2017 | 10:00:00 | 9,5 |
| 23.04.2017 | 11:00:00 | 9,6 |
| 23.04.2017 | 12:00:00 | 9,6 |
| 23.04.2017 | 13:00:00 | 9,6 |
| 23.04.2017 | 14:00:00 | 9,6 |
| 23.04.2017 | 15:00:00 | 9,6 |
| 23.04.2017 | 16:00:00 | 9,6 |
| 23.04.2017 | 17:00:00 | 9,6 |
| 23.04.2017 | 18:00:00 | 9,5 |

|            |          |     |
|------------|----------|-----|
| 23.04.2017 | 19:00:00 | 9,5 |
| 23.04.2017 | 20:00:00 | 9,4 |
| 23.04.2017 | 21:00:00 | 9,4 |
| 23.04.2017 | 22:00:00 | 9,4 |
| 23.04.2017 | 23:00:00 | 9,4 |
| 24.04.2017 | 00:00:00 | 9,4 |
| 24.04.2017 | 01:00:00 | 9,4 |
| 24.04.2017 | 02:00:00 | 9,3 |
| 24.04.2017 | 03:00:00 | 9,3 |
| 24.04.2017 | 04:00:00 | 9,3 |
| 24.04.2017 | 05:00:00 | 9,2 |
| 24.04.2017 | 06:00:00 | 9,2 |
| 24.04.2017 | 07:00:00 | 9,2 |
| 24.04.2017 | 08:00:00 | 9,2 |
| 24.04.2017 | 09:00:00 | 9,2 |
| 24.04.2017 | 10:00:00 | 9,4 |
| 24.04.2017 | 11:00:00 | 9,5 |
| 24.04.2017 | 12:00:00 | 9,5 |
| 24.04.2017 | 13:00:00 | 9,6 |
| 24.04.2017 | 14:00:00 | 9,6 |
| 24.04.2017 | 15:00:00 | 9,6 |
| 24.04.2017 | 16:00:00 | 9,6 |
| 24.04.2017 | 17:00:00 | 9,6 |
| 24.04.2017 | 18:00:00 | 9,5 |
| 24.04.2017 | 19:00:00 | 9,5 |
| 24.04.2017 | 20:00:00 | 9,4 |
| 24.04.2017 | 21:00:00 | 9,3 |
| 24.04.2017 | 22:00:00 | 9,3 |
| 24.04.2017 | 23:00:00 | 9,3 |
| 25.04.2017 | 00:00:00 | 9,3 |
| 25.04.2017 | 01:00:00 | 9,3 |
| 25.04.2017 | 02:00:00 | 9,3 |
| 25.04.2017 | 03:00:00 | 9,2 |
| 25.04.2017 | 04:00:00 | 9,2 |
| 25.04.2017 | 05:00:00 | 9,2 |
| 25.04.2017 | 06:00:00 | 9,2 |
| 25.04.2017 | 07:00:00 | 9,2 |
| 25.04.2017 | 08:00:00 | 9,4 |
| 25.04.2017 | 09:00:00 | 9,3 |
| 25.04.2017 | 10:00:00 | 9,5 |
| 25.04.2017 | 11:00:00 | 9,6 |
| 25.04.2017 | 12:00:00 | 9,7 |
| 25.04.2017 | 13:00:00 | 9,8 |
| 25.04.2017 | 14:00:00 | 9,8 |
| 25.04.2017 | 15:00:00 | 9,8 |
| 25.04.2017 | 16:00:00 | 9,8 |

|            |          |     |
|------------|----------|-----|
| 25.04.2017 | 17:00:00 | 9,7 |
| 25.04.2017 | 18:00:00 | 9,7 |
| 25.04.2017 | 19:00:00 | 9,6 |
| 25.04.2017 | 20:00:00 | 9,6 |
| 25.04.2017 | 21:00:00 | 9,6 |
| 25.04.2017 | 22:00:00 | 9,5 |
| 25.04.2017 | 23:00:00 | 9,6 |
| 26.04.2017 | 00:00:00 | 9,6 |
| 26.04.2017 | 01:00:00 | 9,6 |
| 26.04.2017 | 02:00:00 | 9,6 |
| 26.04.2017 | 03:00:00 | 9,6 |
| 26.04.2017 | 04:00:00 | 9,5 |
| 26.04.2017 | 05:00:00 | 9,5 |
| 26.04.2017 | 06:00:00 | 9,4 |
| 26.04.2017 | 07:00:00 | 9,4 |
| 26.04.2017 | 08:00:00 | 9,4 |
| 26.04.2017 | 09:00:00 | 9,6 |
| 26.04.2017 | 10:00:00 | 9,6 |
| 26.04.2017 | 11:00:00 | 9,7 |
| 26.04.2017 | 12:00:00 | 9,9 |
| 26.04.2017 | 13:00:00 | 9,9 |
| 26.04.2017 | 14:00:00 | 9,9 |
| 26.04.2017 | 15:00:00 | 9,9 |
| 26.04.2017 | 16:00:00 | 9,9 |
| 26.04.2017 | 17:00:00 | 9,9 |
| 26.04.2017 | 18:00:00 | 9,9 |
| 26.04.2017 | 19:00:00 | 9,8 |
| 26.04.2017 | 20:00:00 | 9,8 |
| 26.04.2017 | 21:00:00 | 9,8 |
| 26.04.2017 | 22:00:00 | 9,8 |
| 26.04.2017 | 23:00:00 | 9,8 |
| 27.04.2017 | 00:00:00 | 9,8 |
| 27.04.2017 | 01:00:00 | 9,7 |
| 27.04.2017 | 02:00:00 | 9,7 |
| 27.04.2017 | 03:00:00 | 9,6 |
| 27.04.2017 | 04:00:00 | 9,6 |
| 27.04.2017 | 05:00:00 | 9,5 |
| 27.04.2017 | 06:00:00 | 9,5 |
| 27.04.2017 | 07:00:00 | 9,5 |
| 27.04.2017 | 08:00:00 | 9,5 |
| 27.04.2017 | 09:00:00 | 9,5 |
| 27.04.2017 | 10:00:00 | 9,5 |
| 27.04.2017 | 11:00:00 | 9,5 |
| 27.04.2017 | 12:00:00 | 9,5 |
| 27.04.2017 | 13:00:00 | 9,5 |
| 27.04.2017 | 14:00:00 | 9,5 |

|            |          |     |
|------------|----------|-----|
| 27.04.2017 | 15:00:00 | 9,5 |
| 27.04.2017 | 16:00:00 | 9,6 |
| 27.04.2017 | 17:00:00 | 9,6 |
| 27.04.2017 | 18:00:00 | 9,6 |
| 27.04.2017 | 19:00:00 | 9,6 |
| 27.04.2017 | 20:00:00 | 9,5 |
| 27.04.2017 | 21:00:00 | 9,5 |
| 27.04.2017 | 22:00:00 | 9,5 |
| 27.04.2017 | 23:00:00 | 9,4 |
| 28.04.2017 | 00:00:00 | 9,4 |
| 28.04.2017 | 01:00:00 | 9,4 |
| 28.04.2017 | 02:00:00 | 9,3 |
| 28.04.2017 | 03:00:00 | 9,3 |
| 28.04.2017 | 04:00:00 | 9,3 |
| 28.04.2017 | 05:00:00 | 9,2 |
| 28.04.2017 | 06:00:00 | 9,2 |
| 28.04.2017 | 07:00:00 | 9,2 |
| 28.04.2017 | 08:00:00 | 9,1 |
| 28.04.2017 | 09:00:00 | 9,1 |
| 28.04.2017 | 10:00:00 | 9,1 |
| 28.04.2017 | 11:00:00 | 9,1 |
| 28.04.2017 | 12:00:00 | 9,1 |
| 28.04.2017 | 13:00:00 | 9,1 |
| 28.04.2017 | 14:00:00 | 9,1 |
| 28.04.2017 | 15:00:00 | 9,1 |
| 28.04.2017 | 16:00:00 | 9,1 |
| 28.04.2017 | 17:00:00 | 9,1 |
| 28.04.2017 | 18:00:00 | 9   |
| 28.04.2017 | 19:00:00 | 9   |
| 28.04.2017 | 20:00:00 | 9   |
| 28.04.2017 | 21:00:00 | 8,9 |
| 28.04.2017 | 22:00:00 | 8,9 |
| 28.04.2017 | 23:00:00 | 8,9 |
| 29.04.2017 | 00:00:00 | 8,9 |
| 29.04.2017 | 01:00:00 | 8,9 |
| 29.04.2017 | 02:00:00 | 8,8 |
| 29.04.2017 | 03:00:00 | 8,8 |
| 29.04.2017 | 04:00:00 | 8,8 |
| 29.04.2017 | 05:00:00 | 8,8 |
| 29.04.2017 | 06:00:00 | 8,8 |
| 29.04.2017 | 07:00:00 | 8,9 |
| 29.04.2017 | 08:00:00 | 9   |
| 29.04.2017 | 09:00:00 | 9,1 |
| 29.04.2017 | 10:00:00 | 9,2 |
| 29.04.2017 | 11:00:00 | 9,2 |
| 29.04.2017 | 12:00:00 | 9,3 |

|            |          |     |
|------------|----------|-----|
| 29.04.2017 | 13:00:00 | 9,4 |
| 29.04.2017 | 14:00:00 | 9,3 |
| 29.04.2017 | 15:00:00 | 9,3 |
| 29.04.2017 | 16:00:00 | 9,2 |
| 29.04.2017 | 17:00:00 | 9,2 |
| 29.04.2017 | 18:00:00 | 9,1 |
| 29.04.2017 | 19:00:00 | 9,1 |
| 29.04.2017 | 20:00:00 | 9,1 |
| 29.04.2017 | 21:00:00 | 9,1 |
| 29.04.2017 | 22:00:00 | 9   |
| 29.04.2017 | 23:00:00 | 9   |
| 30.04.2017 | 00:00:00 | 9   |
| 30.04.2017 | 01:00:00 | 9   |
| 30.04.2017 | 02:00:00 | 8,9 |
| 30.04.2017 | 03:00:00 | 8,9 |
| 30.04.2017 | 04:00:00 | 8,9 |
| 30.04.2017 | 05:00:00 | 8,9 |
| 30.04.2017 | 06:00:00 | 8,9 |
| 30.04.2017 | 07:00:00 | 9   |
| 30.04.2017 | 08:00:00 | 9,1 |
| 30.04.2017 | 09:00:00 | 9,2 |
| 30.04.2017 | 10:00:00 | 9,3 |
| 30.04.2017 | 11:00:00 | 9,4 |
| 30.04.2017 | 12:00:00 | 9,5 |
| 30.04.2017 | 13:00:00 | 9,5 |
| 30.04.2017 | 14:00:00 | 9,6 |
| 30.04.2017 | 15:00:00 | 9,5 |
| 30.04.2017 | 16:00:00 | 9,5 |
| 30.04.2017 | 17:00:00 | 9,5 |
| 30.04.2017 | 18:00:00 | 9,4 |
| 30.04.2017 | 19:00:00 | 9,4 |
| 30.04.2017 | 20:00:00 | 9,4 |
| 30.04.2017 | 21:00:00 | 9,3 |
| 30.04.2017 | 22:00:00 | 9,3 |
| 30.04.2017 | 23:00:00 | 9,3 |
| 01.05.2017 | 00:00:00 | 9,3 |
| 01.05.2017 | 01:00:00 | 9,2 |
| 01.05.2017 | 02:00:00 | 9,2 |
| 01.05.2017 | 03:00:00 | 9,2 |
| 01.05.2017 | 04:00:00 | 9,1 |
| 01.05.2017 | 05:00:00 | 9,1 |
| 01.05.2017 | 06:00:00 | 9,1 |
| 01.05.2017 | 07:00:00 | 9,1 |
| 01.05.2017 | 08:00:00 | 9,2 |
| 01.05.2017 | 09:00:00 | 9,2 |
| 01.05.2017 | 10:00:00 | 9,3 |

|            |          |      |
|------------|----------|------|
| 01.05.2017 | 11:00:00 | 9,6  |
| 01.05.2017 | 12:00:00 | 9,7  |
| 01.05.2017 | 13:00:00 | 9,8  |
| 01.05.2017 | 14:00:00 | 9,9  |
| 01.05.2017 | 15:00:00 | 9,9  |
| 01.05.2017 | 16:00:00 | 9,9  |
| 01.05.2017 | 17:00:00 | 9,9  |
| 01.05.2017 | 18:00:00 | 9,8  |
| 01.05.2017 | 19:00:00 | 9,7  |
| 01.05.2017 | 20:00:00 | 9,7  |
| 01.05.2017 | 21:00:00 | 9,6  |
| 01.05.2017 | 22:00:00 | 9,6  |
| 01.05.2017 | 23:00:00 | 9,5  |
| 02.05.2017 | 00:00:00 | 9,5  |
| 02.05.2017 | 01:00:00 | 9,5  |
| 02.05.2017 | 02:00:00 | 9,5  |
| 02.05.2017 | 03:00:00 | 9,4  |
| 02.05.2017 | 04:00:00 | 9,4  |
| 02.05.2017 | 05:00:00 | 9,3  |
| 02.05.2017 | 06:00:00 | 9,3  |
| 02.05.2017 | 07:00:00 | 9,3  |
| 02.05.2017 | 08:00:00 | 9,3  |
| 02.05.2017 | 09:00:00 | 9,5  |
| 02.05.2017 | 10:00:00 | 9,7  |
| 02.05.2017 | 11:00:00 | 9,9  |
| 02.05.2017 | 12:00:00 | 10   |
| 02.05.2017 | 13:00:00 | 10,2 |
| 02.05.2017 | 14:00:00 | 10,1 |
| 02.05.2017 | 15:00:00 | 10,1 |
| 02.05.2017 | 16:00:00 | 10,1 |
| 02.05.2017 | 17:00:00 | 10,2 |
| 02.05.2017 | 18:00:00 | 10,1 |
| 02.05.2017 | 19:00:00 | 10,1 |
| 02.05.2017 | 20:00:00 | 10   |
| 02.05.2017 | 21:00:00 | 10   |
| 02.05.2017 | 22:00:00 | 9,9  |
| 02.05.2017 | 23:00:00 | 9,9  |
| 03.05.2017 | 00:00:00 | 9,9  |
| 03.05.2017 | 01:00:00 | 9,8  |
| 03.05.2017 | 02:00:00 | 9,8  |
| 03.05.2017 | 03:00:00 | 9,8  |
| 03.05.2017 | 04:00:00 | 9,8  |
| 03.05.2017 | 05:00:00 | 9,7  |
| 03.05.2017 | 06:00:00 | 9,7  |
| 03.05.2017 | 07:00:00 | 9,8  |
| 03.05.2017 | 08:00:00 | 9,9  |



|            |          |      |
|------------|----------|------|
| 03.05.2017 | 09:00:00 | 10   |
| 03.05.2017 | 10:00:00 | 10,1 |
| 03.05.2017 | 11:00:00 | 10,2 |
| 03.05.2017 | 12:00:00 | 10,3 |
| 03.05.2017 | 13:00:00 | 10,3 |
| 03.05.2017 | 14:00:00 | 10,4 |
| 03.05.2017 | 15:00:00 | 10,3 |
| 03.05.2017 | 16:00:00 | 10,3 |
| 03.05.2017 | 17:00:00 | 10,3 |
| 03.05.2017 | 18:00:00 | 10,2 |
| 03.05.2017 | 19:00:00 | 10,2 |
| 03.05.2017 | 20:00:00 | 10,2 |
| 03.05.2017 | 21:00:00 | 10,1 |
| 03.05.2017 | 22:00:00 | 10,1 |
| 03.05.2017 | 23:00:00 | 10   |
| 04.05.2017 | 00:00:00 | 10   |
| 04.05.2017 | 01:00:00 | 10   |
| 04.05.2017 | 02:00:00 | 10   |
| 04.05.2017 | 03:00:00 | 10   |
| 04.05.2017 | 04:00:00 | 10   |
| 04.05.2017 | 05:00:00 | 10   |
| 04.05.2017 | 06:00:00 | 10   |
| 04.05.2017 | 07:00:00 | 10,1 |
| 04.05.2017 | 08:00:00 | 10,1 |
| 04.05.2017 | 09:00:00 | 10,2 |
| 04.05.2017 | 10:00:00 | 10,4 |
| 04.05.2017 | 11:00:00 | 10,3 |
| 04.05.2017 | 12:00:00 | 10,4 |
| 04.05.2017 | 13:00:00 | 10,4 |
| 04.05.2017 | 14:00:00 | 10,4 |
| 04.05.2017 | 15:00:00 | 10,5 |
| 04.05.2017 | 16:00:00 | 10,5 |
| 04.05.2017 | 17:00:00 | 10,4 |
| 04.05.2017 | 18:00:00 | 10,4 |
| 04.05.2017 | 19:00:00 | 10,4 |
| 04.05.2017 | 20:00:00 | 10,4 |
| 04.05.2017 | 21:00:00 | 10,4 |
| 04.05.2017 | 22:00:00 | 10,5 |
| 04.05.2017 | 23:00:00 | 10,5 |
| 05.05.2017 | 00:00:00 | 10,5 |
| 05.05.2017 | 01:00:00 | 10,5 |
| 05.05.2017 | 02:00:00 | 10,6 |
| 05.05.2017 | 03:00:00 | 10,6 |
| 05.05.2017 | 04:00:00 | 10,5 |
| 05.05.2017 | 05:00:00 | 10,6 |
| 05.05.2017 | 06:00:00 | 10,6 |

|            |          |      |
|------------|----------|------|
| 05.05.2017 | 07:00:00 | 10,6 |
| 05.05.2017 | 08:00:00 | 10,8 |
| 05.05.2017 | 09:00:00 | 10,8 |
| 05.05.2017 | 10:00:00 | 10,8 |
| 05.05.2017 | 11:00:00 | 10,9 |
| 05.05.2017 | 12:00:00 | 11   |
| 05.05.2017 | 13:00:00 | 11,1 |
| 05.05.2017 | 14:00:00 | 11,2 |
| 05.05.2017 | 15:00:00 | 11,3 |
| 05.05.2017 | 16:00:00 | 11,3 |
| 05.05.2017 | 17:00:00 | 11,2 |
| 05.05.2017 | 18:00:00 | 11,2 |
| 05.05.2017 | 19:00:00 | 11,2 |
| 05.05.2017 | 20:00:00 | 11,2 |
| 05.05.2017 | 21:00:00 | 11,2 |
| 05.05.2017 | 22:00:00 | 11,2 |
| 05.05.2017 | 23:00:00 | 11,2 |
| 06.05.2017 | 00:00:00 | 11,2 |
| 06.05.2017 | 01:00:00 | 11,2 |
| 06.05.2017 | 02:00:00 | 11,2 |
| 06.05.2017 | 03:00:00 | 11,2 |
| 06.05.2017 | 04:00:00 | 11,1 |
| 06.05.2017 | 05:00:00 | 11,1 |
| 06.05.2017 | 06:00:00 | 11,1 |
| 06.05.2017 | 07:00:00 | 11,2 |
| 06.05.2017 | 08:00:00 | 11,2 |
| 06.05.2017 | 09:00:00 | 11,4 |
| 06.05.2017 | 10:00:00 | 11,5 |
| 06.05.2017 | 11:00:00 | 11,7 |
| 06.05.2017 | 12:00:00 | 11,7 |
| 06.05.2017 | 13:00:00 | 11,8 |
| 06.05.2017 | 14:00:00 | 11,8 |
| 06.05.2017 | 15:00:00 | 11,8 |
| 06.05.2017 | 16:00:00 | 11,9 |
| 06.05.2017 | 17:00:00 | 11,9 |
| 06.05.2017 | 18:00:00 | 11,8 |
| 06.05.2017 | 19:00:00 | 11,8 |
| 06.05.2017 | 20:00:00 | 11,8 |
| 06.05.2017 | 21:00:00 | 11,8 |
| 06.05.2017 | 22:00:00 | 11,8 |
| 06.05.2017 | 23:00:00 | 11,8 |
| 07.05.2017 | 00:00:00 | 11,8 |
| 07.05.2017 | 01:00:00 | 11,8 |
| 07.05.2017 | 02:00:00 | 11,7 |
| 07.05.2017 | 03:00:00 | 11,7 |
| 07.05.2017 | 04:00:00 | 11,7 |

|            |          |      |
|------------|----------|------|
| 07.05.2017 | 05:00:00 | 11,6 |
| 07.05.2017 | 06:00:00 | 11,6 |
| 07.05.2017 | 07:00:00 | 11,6 |
| 07.05.2017 | 08:00:00 | 11,7 |
| 07.05.2017 | 09:00:00 | 11,7 |
| 07.05.2017 | 10:00:00 | 11,8 |
| 07.05.2017 | 11:00:00 | 12   |
| 07.05.2017 | 12:00:00 | 12   |
| 07.05.2017 | 13:00:00 | 12,2 |
| 07.05.2017 | 14:00:00 | 12,2 |
| 07.05.2017 | 15:00:00 | 12,2 |
| 07.05.2017 | 16:00:00 | 12,3 |
| 07.05.2017 | 17:00:00 | 12,3 |
| 07.05.2017 | 18:00:00 | 12,2 |
| 07.05.2017 | 19:00:00 | 12,1 |
| 07.05.2017 | 20:00:00 | 12,1 |
| 07.05.2017 | 21:00:00 | 12   |
| 07.05.2017 | 22:00:00 | 12   |
| 07.05.2017 | 23:00:00 | 12   |
| 08.05.2017 | 00:00:00 | 12   |
| 08.05.2017 | 01:00:00 | 12   |
| 08.05.2017 | 02:00:00 | 12   |
| 08.05.2017 | 03:00:00 | 12,1 |
| 08.05.2017 | 04:00:00 | 12,1 |
| 08.05.2017 | 05:00:00 | 12,1 |
| 08.05.2017 | 06:00:00 | 12,1 |
| 08.05.2017 | 07:00:00 | 12,1 |
| 08.05.2017 | 08:00:00 | 12,1 |
| 08.05.2017 | 09:00:00 | 12,2 |
| 08.05.2017 | 10:00:00 | 12,3 |
| 08.05.2017 | 11:00:00 | 12,3 |
| 08.05.2017 | 12:00:00 | 12,4 |
| 08.05.2017 | 13:00:00 | 12,5 |
| 08.05.2017 | 14:00:00 | 12,6 |
| 08.05.2017 | 15:00:00 | 12,6 |
| 08.05.2017 | 16:00:00 | 12,6 |
| 08.05.2017 | 17:00:00 | 12,6 |
| 08.05.2017 | 18:00:00 | 12,5 |
| 08.05.2017 | 19:00:00 | 12,5 |
| 08.05.2017 | 20:00:00 | 12,4 |
| 08.05.2017 | 21:00:00 | 12,3 |
| 08.05.2017 | 22:00:00 | 12,2 |
| 08.05.2017 | 23:00:00 | 12,2 |
| 09.05.2017 | 00:00:00 | 12,1 |
| 09.05.2017 | 01:00:00 | 12,1 |
| 09.05.2017 | 02:00:00 | 12   |

|            |          |      |
|------------|----------|------|
| 09.05.2017 | 03:00:00 | 12   |
| 09.05.2017 | 04:00:00 | 11,9 |
| 09.05.2017 | 05:00:00 | 11,9 |
| 09.05.2017 | 06:00:00 | 11,9 |
| 09.05.2017 | 07:00:00 | 11,9 |
| 09.05.2017 | 08:00:00 | 12   |
| 09.05.2017 | 09:00:00 | 12   |
| 09.05.2017 | 10:00:00 | 12   |
| 09.05.2017 | 11:00:00 | 12   |
| 09.05.2017 | 12:00:00 | 12   |
| 09.05.2017 | 13:00:00 | 11,9 |
| 09.05.2017 | 14:00:00 | 11,9 |
| 09.05.2017 | 15:00:00 | 11,9 |
| 09.05.2017 | 16:00:00 | 11,9 |
| 09.05.2017 | 17:00:00 | 11,9 |
| 09.05.2017 | 18:00:00 | 11,9 |
| 09.05.2017 | 19:00:00 | 11,9 |
| 09.05.2017 | 20:00:00 | 11,9 |
| 09.05.2017 | 21:00:00 | 11,8 |
| 09.05.2017 | 22:00:00 | 11,7 |
| 09.05.2017 | 23:00:00 | 11,7 |
| 10.05.2017 | 00:00:00 | 11,6 |
| 10.05.2017 | 01:00:00 | 11,6 |
| 10.05.2017 | 02:00:00 | 11,6 |
| 10.05.2017 | 03:00:00 | 11,5 |
| 10.05.2017 | 04:00:00 | 11,5 |
| 10.05.2017 | 05:00:00 | 11,5 |
| 10.05.2017 | 06:00:00 | 11,5 |
| 10.05.2017 | 07:00:00 | 11,6 |
| 10.05.2017 | 08:00:00 | 11,6 |
| 10.05.2017 | 09:00:00 | 11,7 |
| 10.05.2017 | 10:00:00 | 11,7 |
| 10.05.2017 | 11:00:00 | 11,8 |
| 10.05.2017 | 12:00:00 | 11,8 |
| 10.05.2017 | 13:00:00 | 11,8 |
| 10.05.2017 | 14:00:00 | 11,7 |
| 10.05.2017 | 15:00:00 | 11,7 |
| 10.05.2017 | 16:00:00 | 11,6 |
| 10.05.2017 | 17:00:00 | 11,6 |
| 10.05.2017 | 18:00:00 | 11,5 |
| 10.05.2017 | 19:00:00 | 11,5 |
| 10.05.2017 | 20:00:00 | 11,4 |
| 10.05.2017 | 21:00:00 | 11,4 |
| 10.05.2017 | 22:00:00 | 11,4 |
| 10.05.2017 | 23:00:00 | 11,4 |
| 11.05.2017 | 00:00:00 | 11,3 |

|            |          |      |
|------------|----------|------|
| 11.05.2017 | 01:00:00 | 11,3 |
| 11.05.2017 | 02:00:00 | 11,3 |
| 11.05.2017 | 03:00:00 | 11,3 |
| 11.05.2017 | 04:00:00 | 11,3 |
| 11.05.2017 | 05:00:00 | 11,3 |
| 11.05.2017 | 06:00:00 | 11,4 |
| 11.05.2017 | 07:00:00 | 11,5 |
| 11.05.2017 | 08:00:00 | 11,6 |
| 11.05.2017 | 09:00:00 | 11,7 |
| 11.05.2017 | 10:00:00 | 11,8 |
| 11.05.2017 | 11:00:00 | 11,9 |
| 11.05.2017 | 12:00:00 | 12   |
| 11.05.2017 | 13:00:00 | 12,1 |
| 11.05.2017 | 14:00:00 | 12   |
| 11.05.2017 | 15:00:00 | 12   |
| 11.05.2017 | 16:00:00 | 12   |
| 11.05.2017 | 17:00:00 | 12   |
| 11.05.2017 | 18:00:00 | 11,9 |
| 11.05.2017 | 19:00:00 | 11,9 |
| 11.05.2017 | 20:00:00 | 11,9 |
| 11.05.2017 | 21:00:00 | 11,8 |
| 11.05.2017 | 22:00:00 | 11,8 |
| 11.05.2017 | 23:00:00 | 11,8 |
| 12.05.2017 | 00:00:00 | 11,8 |
| 12.05.2017 | 01:00:00 | 11,7 |
| 12.05.2017 | 02:00:00 | 11,7 |
| 12.05.2017 | 03:00:00 | 11,7 |
| 12.05.2017 | 04:00:00 | 11,7 |
| 12.05.2017 | 05:00:00 | 11,7 |
| 12.05.2017 | 06:00:00 | 11,7 |
| 12.05.2017 | 07:00:00 | 11,8 |
| 12.05.2017 | 08:00:00 | 11,8 |
| 12.05.2017 | 09:00:00 | 12   |
| 12.05.2017 | 10:00:00 | 12,1 |
| 12.05.2017 | 11:00:00 | 12,2 |
| 12.05.2017 | 12:00:00 | 12,3 |
| 12.05.2017 | 13:00:00 | 12,4 |
| 12.05.2017 | 14:00:00 | 12,5 |
| 12.05.2017 | 15:00:00 | 12,5 |
| 12.05.2017 | 16:00:00 | 12,6 |
| 12.05.2017 | 17:00:00 | 12,6 |
| 12.05.2017 | 18:00:00 | 12,5 |
| 12.05.2017 | 19:00:00 | 12,4 |
| 12.05.2017 | 20:00:00 | 12,3 |
| 12.05.2017 | 21:00:00 | 12,3 |
| 12.05.2017 | 22:00:00 | 12,3 |

|            |          |      |
|------------|----------|------|
| 12.05.2017 | 23:00:00 | 12,3 |
| 13.05.2017 | 00:00:00 | 12,2 |
| 13.05.2017 | 01:00:00 | 12,2 |
| 13.05.2017 | 02:00:00 | 12,2 |
| 13.05.2017 | 03:00:00 | 12,2 |
| 13.05.2017 | 04:00:00 | 12,1 |
| 13.05.2017 | 05:00:00 | 12,1 |
| 13.05.2017 | 06:00:00 | 12,1 |
| 13.05.2017 | 07:00:00 | 12,1 |
| 13.05.2017 | 08:00:00 | 12,1 |
| 13.05.2017 | 09:00:00 | 12,2 |
| 13.05.2017 | 10:00:00 | 12,3 |
| 13.05.2017 | 11:00:00 | 12,5 |
| 13.05.2017 | 12:00:00 | 12,7 |
| 13.05.2017 | 13:00:00 | 12,8 |
| 13.05.2017 | 14:00:00 | 12,9 |
| 13.05.2017 | 15:00:00 | 12,9 |
| 13.05.2017 | 16:00:00 | 12,9 |
| 13.05.2017 | 17:00:00 | 12,8 |
| 13.05.2017 | 18:00:00 | 12,8 |
| 13.05.2017 | 19:00:00 | 12,7 |
| 13.05.2017 | 20:00:00 | 12,7 |
| 13.05.2017 | 21:00:00 | 12,7 |
| 13.05.2017 | 22:00:00 | 12,7 |
| 13.05.2017 | 23:00:00 | 12,7 |
| 14.05.2017 | 00:00:00 | 12,7 |
| 14.05.2017 | 01:00:00 | 12,6 |
| 14.05.2017 | 02:00:00 | 12,6 |
| 14.05.2017 | 03:00:00 | 12,5 |
| 14.05.2017 | 04:00:00 | 12,5 |
| 14.05.2017 | 05:00:00 | 12,5 |
| 14.05.2017 | 06:00:00 | 12,5 |
| 14.05.2017 | 07:00:00 | 12,6 |
| 14.05.2017 | 08:00:00 | 12,7 |
| 14.05.2017 | 09:00:00 | 12,8 |
| 14.05.2017 | 10:00:00 | 13   |
| 14.05.2017 | 11:00:00 | 13,1 |
| 14.05.2017 | 12:00:00 | 13,3 |
| 14.05.2017 | 13:00:00 | 13,3 |
| 14.05.2017 | 14:00:00 | 13,3 |
| 14.05.2017 | 15:00:00 | 13,2 |
| 14.05.2017 | 16:00:00 | 13,1 |
| 14.05.2017 | 17:00:00 | 13,1 |
| 14.05.2017 | 18:00:00 | 13,1 |
| 14.05.2017 | 19:00:00 | 13,1 |
| 14.05.2017 | 20:00:00 | 13   |

|            |          |      |
|------------|----------|------|
| 14.05.2017 | 21:00:00 | 13   |
| 14.05.2017 | 22:00:00 | 13   |
| 14.05.2017 | 23:00:00 | 13   |
| 15.05.2017 | 00:00:00 | 13   |
| 15.05.2017 | 01:00:00 | 13   |
| 15.05.2017 | 02:00:00 | 13   |
| 15.05.2017 | 03:00:00 | 12,9 |
| 15.05.2017 | 04:00:00 | 12,9 |
| 15.05.2017 | 05:00:00 | 12,9 |
| 15.05.2017 | 06:00:00 | 12,8 |
| 15.05.2017 | 07:00:00 | 12,8 |
| 15.05.2017 | 08:00:00 | 12,8 |
| 15.05.2017 | 09:00:00 | 12,9 |
| 15.05.2017 | 10:00:00 | 13   |
| 15.05.2017 | 11:00:00 | 13,1 |
| 15.05.2017 | 12:00:00 | 13,2 |
| 15.05.2017 | 13:00:00 | 13,3 |
| 15.05.2017 | 14:00:00 | 13,3 |
| 15.05.2017 | 15:00:00 | 13,2 |
| 15.05.2017 | 16:00:00 | 13,2 |
| 15.05.2017 | 17:00:00 | 13,2 |
| 15.05.2017 | 18:00:00 | 13,3 |
| 15.05.2017 | 19:00:00 | 13,3 |
| 15.05.2017 | 20:00:00 | 13,4 |
| 15.05.2017 | 21:00:00 | 13,4 |
| 15.05.2017 | 22:00:00 | 13,4 |
| 15.05.2017 | 23:00:00 | 13,4 |
| 16.05.2017 | 00:00:00 | 13,4 |
| 16.05.2017 | 01:00:00 | 13,4 |
| 16.05.2017 | 02:00:00 | 13,4 |
| 16.05.2017 | 03:00:00 | 13,4 |
| 16.05.2017 | 04:00:00 | 13,4 |
| 16.05.2017 | 05:00:00 | 13,4 |
| 16.05.2017 | 06:00:00 | 13,4 |
| 16.05.2017 | 07:00:00 | 13,5 |
| 16.05.2017 | 08:00:00 | 13,6 |
| 16.05.2017 | 09:00:00 | 13,7 |
| 16.05.2017 | 10:00:00 | 13,8 |
| 16.05.2017 | 11:00:00 | 14   |
| 16.05.2017 | 12:00:00 | 14,1 |
| 16.05.2017 | 13:00:00 | 14,1 |
| 16.05.2017 | 14:00:00 | 14,2 |
| 16.05.2017 | 15:00:00 | 14,2 |
| 16.05.2017 | 16:00:00 | 14,2 |
| 16.05.2017 | 17:00:00 | 14,1 |
| 16.05.2017 | 18:00:00 | 14,1 |

|            |          |      |
|------------|----------|------|
| 16.05.2017 | 19:00:00 | 14,1 |
| 16.05.2017 | 20:00:00 | 14,1 |
| 16.05.2017 | 21:00:00 | 14,1 |
| 16.05.2017 | 22:00:00 | 14,1 |
| 16.05.2017 | 23:00:00 | 14   |
| 17.05.2017 | 00:00:00 | 14   |
| 17.05.2017 | 01:00:00 | 14   |
| 17.05.2017 | 02:00:00 | 14   |
| 17.05.2017 | 03:00:00 | 13,9 |
| 17.05.2017 | 04:00:00 | 13,9 |
| 17.05.2017 | 05:00:00 | 13,9 |
| 17.05.2017 | 06:00:00 | 13,9 |
| 17.05.2017 | 07:00:00 | 14   |
| 17.05.2017 | 08:00:00 | 14   |
| 17.05.2017 | 09:00:00 | 14,1 |
| 17.05.2017 | 10:00:00 | 14,3 |
| 17.05.2017 | 11:00:00 | 14,4 |
| 17.05.2017 | 12:00:00 | 14,4 |
| 17.05.2017 | 13:00:00 | 14,5 |
| 17.05.2017 | 14:00:00 | 14,6 |
| 17.05.2017 | 15:00:00 | 14,5 |
| 17.05.2017 | 16:00:00 | 14,5 |
| 17.05.2017 | 17:00:00 | 14,5 |
| 17.05.2017 | 18:00:00 | 14,4 |
| 17.05.2017 | 19:00:00 | 14,4 |
| 17.05.2017 | 20:00:00 | 14,4 |
| 17.05.2017 | 21:00:00 | 14,3 |
| 17.05.2017 | 22:00:00 | 14,3 |
| 17.05.2017 | 23:00:00 | 14,3 |
| 18.05.2017 | 00:00:00 | 14,3 |
| 18.05.2017 | 01:00:00 | 14,3 |
| 18.05.2017 | 02:00:00 | 14,3 |
| 18.05.2017 | 03:00:00 | 14,3 |
| 18.05.2017 | 04:00:00 | 14,2 |
| 18.05.2017 | 05:00:00 | 14,2 |
| 18.05.2017 | 06:00:00 | 14,2 |
| 18.05.2017 | 07:00:00 | 14,3 |
| 18.05.2017 | 08:00:00 | 14,4 |
| 18.05.2017 | 09:00:00 | 14,5 |
| 18.05.2017 | 10:00:00 | 14,7 |
| 18.05.2017 | 11:00:00 | 14,9 |
| 18.05.2017 | 12:00:00 | 15,1 |
| 18.05.2017 | 13:00:00 | 15,2 |
| 18.05.2017 | 14:00:00 | 15,3 |
| 18.05.2017 | 15:00:00 | 15,3 |
| 18.05.2017 | 16:00:00 | 15,3 |



|            |          |      |
|------------|----------|------|
| 18.05.2017 | 17:00:00 | 15,3 |
| 18.05.2017 | 18:00:00 | 15,2 |
| 18.05.2017 | 19:00:00 | 15,2 |
| 18.05.2017 | 20:00:00 | 15,1 |
| 18.05.2017 | 21:00:00 | 15,1 |
| 18.05.2017 | 22:00:00 | 15   |
| 18.05.2017 | 23:00:00 | 15   |
| 19.05.2017 | 00:00:00 | 15   |
| 19.05.2017 | 01:00:00 | 15   |
| 19.05.2017 | 02:00:00 | 15   |
| 19.05.2017 | 03:00:00 | 14,9 |
| 19.05.2017 | 04:00:00 | 14,9 |
| 19.05.2017 | 05:00:00 | 14,9 |
| 19.05.2017 | 06:00:00 | 14,9 |
| 19.05.2017 | 07:00:00 | 14,9 |
| 19.05.2017 | 08:00:00 | 15   |
| 19.05.2017 | 09:00:00 | 15,2 |
| 19.05.2017 | 10:00:00 | 15,4 |
| 19.05.2017 | 11:00:00 | 15,5 |
| 19.05.2017 | 12:00:00 | 15,7 |
| 19.05.2017 | 13:00:00 | 15,8 |
| 19.05.2017 | 14:00:00 | 15,9 |
| 19.05.2017 | 15:00:00 | 15,9 |
| 19.05.2017 | 16:00:00 | 15,9 |
| 19.05.2017 | 17:00:00 | 15,9 |
| 19.05.2017 | 18:00:00 | 15,8 |
| 19.05.2017 | 19:00:00 | 15,8 |
| 19.05.2017 | 20:00:00 | 15,7 |
| 19.05.2017 | 21:00:00 | 15,7 |
| 19.05.2017 | 22:00:00 | 15,6 |
| 19.05.2017 | 23:00:00 | 15,6 |
| 20.05.2017 | 00:00:00 | 15,5 |
| 20.05.2017 | 01:00:00 | 15,5 |
| 20.05.2017 | 02:00:00 | 15,5 |
| 20.05.2017 | 03:00:00 | 15,4 |
| 20.05.2017 | 04:00:00 | 15,4 |
| 20.05.2017 | 05:00:00 | 15,4 |
| 20.05.2017 | 06:00:00 | 15,4 |
| 20.05.2017 | 07:00:00 | 15,4 |
| 20.05.2017 | 08:00:00 | 15,4 |
| 20.05.2017 | 09:00:00 | 15,4 |
| 20.05.2017 | 10:00:00 | 15,4 |
| 20.05.2017 | 11:00:00 | 15,5 |
| 20.05.2017 | 12:00:00 | 15,5 |
| 20.05.2017 | 13:00:00 | 15,5 |
| 20.05.2017 | 14:00:00 | 15,5 |

|            |          |      |
|------------|----------|------|
| 20.05.2017 | 15:00:00 | 15,5 |
| 20.05.2017 | 16:00:00 | 15,5 |
| 20.05.2017 | 17:00:00 | 15,5 |
| 20.05.2017 | 18:00:00 | 15,5 |
| 20.05.2017 | 19:00:00 | 15,4 |
| 20.05.2017 | 20:00:00 | 15,4 |
| 20.05.2017 | 21:00:00 | 15,3 |
| 20.05.2017 | 22:00:00 | 15,3 |
| 20.05.2017 | 23:00:00 | 15,3 |
| 21.05.2017 | 00:00:00 | 15,3 |
| 21.05.2017 | 01:00:00 | 15,3 |
| 21.05.2017 | 02:00:00 | 15,3 |
| 21.05.2017 | 03:00:00 | 15,3 |
| 21.05.2017 | 04:00:00 | 15,3 |
| 21.05.2017 | 05:00:00 | 15,2 |
| 21.05.2017 | 06:00:00 | 15,2 |
| 21.05.2017 | 07:00:00 | 15,2 |
| 21.05.2017 | 08:00:00 | 15,2 |
| 21.05.2017 | 09:00:00 | 15,2 |
| 21.05.2017 | 10:00:00 | 15,3 |
| 21.05.2017 | 11:00:00 | 15,4 |
| 21.05.2017 | 12:00:00 | 15,5 |
| 21.05.2017 | 13:00:00 | 15,5 |
| 21.05.2017 | 14:00:00 | 15,4 |
| 21.05.2017 | 15:00:00 | 15,4 |
| 21.05.2017 | 16:00:00 | 15,4 |
| 21.05.2017 | 17:00:00 | 15,4 |
| 21.05.2017 | 18:00:00 | 15,4 |
| 21.05.2017 | 19:00:00 | 15,3 |
| 21.05.2017 | 20:00:00 | 15,2 |
| 21.05.2017 | 21:00:00 | 15,2 |
| 21.05.2017 | 22:00:00 | 15,1 |
| 21.05.2017 | 23:00:00 | 15,1 |
| 22.05.2017 | 00:00:00 | 15,1 |
| 22.05.2017 | 01:00:00 | 15,2 |
| 22.05.2017 | 02:00:00 | 15,2 |
| 22.05.2017 | 03:00:00 | 15,2 |
| 22.05.2017 | 04:00:00 | 15,2 |
| 22.05.2017 | 05:00:00 | 15,2 |
| 22.05.2017 | 06:00:00 | 15,2 |
| 22.05.2017 | 07:00:00 | 15,3 |
| 22.05.2017 | 08:00:00 | 15,4 |
| 22.05.2017 | 09:00:00 | 15,5 |
| 22.05.2017 | 10:00:00 | 15,7 |
| 22.05.2017 | 11:00:00 | 15,8 |
| 22.05.2017 | 12:00:00 | 15,9 |

|            |          |      |
|------------|----------|------|
| 22.05.2017 | 13:00:00 | 16   |
| 22.05.2017 | 14:00:00 | 15,9 |
| 22.05.2017 | 15:00:00 | 15,9 |
| 22.05.2017 | 16:00:00 | 15,9 |
| 22.05.2017 | 17:00:00 | 15,9 |
| 22.05.2017 | 18:00:00 | 15,8 |
| 22.05.2017 | 19:00:00 | 15,8 |
| 22.05.2017 | 20:00:00 | 15,7 |
| 22.05.2017 | 21:00:00 | 15,7 |
| 22.05.2017 | 22:00:00 | 15,6 |
| 22.05.2017 | 23:00:00 | 15,6 |
| 23.05.2017 | 00:00:00 | 15,6 |
| 23.05.2017 | 01:00:00 | 15,6 |
| 23.05.2017 | 02:00:00 | 15,6 |
| 23.05.2017 | 03:00:00 | 15,6 |
| 23.05.2017 | 04:00:00 | 15,6 |
| 23.05.2017 | 05:00:00 | 15,6 |
| 23.05.2017 | 06:00:00 | 15,7 |
| 23.05.2017 | 07:00:00 | 15,7 |
| 23.05.2017 | 08:00:00 | 15,7 |
| 23.05.2017 | 09:00:00 | 15,8 |
| 23.05.2017 | 10:00:00 | 15,9 |
| 23.05.2017 | 11:00:00 | 16   |
| 23.05.2017 | 12:00:00 | 16,2 |
| 23.05.2017 | 13:00:00 | 16,3 |
| 23.05.2017 | 14:00:00 | 16,3 |
| 23.05.2017 | 15:00:00 | 16,4 |
| 23.05.2017 | 16:00:00 | 16,4 |
| 23.05.2017 | 17:00:00 | 16,4 |
| 23.05.2017 | 18:00:00 | 16,4 |
| 23.05.2017 | 19:00:00 | 16,3 |
| 23.05.2017 | 20:00:00 | 16,3 |
| 23.05.2017 | 21:00:00 | 16,2 |
| 23.05.2017 | 22:00:00 | 16,2 |
| 23.05.2017 | 23:00:00 | 16,1 |
| 24.05.2017 | 00:00:00 | 16,2 |
| 24.05.2017 | 01:00:00 | 16,2 |
| 24.05.2017 | 02:00:00 | 16,2 |
| 24.05.2017 | 03:00:00 | 16,1 |
| 24.05.2017 | 04:00:00 | 16,1 |
| 24.05.2017 | 05:00:00 | 16,1 |
| 24.05.2017 | 06:00:00 | 16,1 |
| 24.05.2017 | 07:00:00 | 16,1 |
| 24.05.2017 | 08:00:00 | 16,2 |
| 24.05.2017 | 09:00:00 | 16,2 |
| 24.05.2017 | 10:00:00 | 16,3 |

|            |          |      |
|------------|----------|------|
| 24.05.2017 | 11:00:00 | 16,4 |
| 24.05.2017 | 12:00:00 | 16,3 |
| 24.05.2017 | 13:00:00 | 16,4 |
| 24.05.2017 | 14:00:00 | 16,5 |
| 24.05.2017 | 15:00:00 | 16,5 |
| 24.05.2017 | 16:00:00 | 16,5 |
| 24.05.2017 | 17:00:00 | 16,5 |
| 24.05.2017 | 18:00:00 | 16,4 |
| 24.05.2017 | 19:00:00 | 16,3 |
| 24.05.2017 | 20:00:00 | 16,2 |
| 24.05.2017 | 21:00:00 | 16,2 |
| 24.05.2017 | 22:00:00 | 16,1 |
| 24.05.2017 | 23:00:00 | 16   |
| 25.05.2017 | 00:00:00 | 16   |
| 25.05.2017 | 01:00:00 | 16   |
| 25.05.2017 | 02:00:00 | 15,9 |
| 25.05.2017 | 03:00:00 | 15,8 |
| 25.05.2017 | 04:00:00 | 15,8 |
| 25.05.2017 | 05:00:00 | 15,7 |
| 25.05.2017 | 06:00:00 | 15,7 |
| 25.05.2017 | 07:00:00 | 15,7 |
| 25.05.2017 | 08:00:00 | 15,8 |
| 25.05.2017 | 09:00:00 | 15,8 |
| 25.05.2017 | 10:00:00 | 15,8 |
| 25.05.2017 | 11:00:00 | 15,9 |
| 25.05.2017 | 12:00:00 | 15,9 |
| 25.05.2017 | 13:00:00 | 16   |
| 25.05.2017 | 14:00:00 | 16   |
| 25.05.2017 | 15:00:00 | 16   |
| 25.05.2017 | 16:00:00 | 15,9 |
| 25.05.2017 | 17:00:00 | 15,9 |
| 25.05.2017 | 18:00:00 | 15,9 |
| 25.05.2017 | 19:00:00 | 15,9 |
| 25.05.2017 | 20:00:00 | 15,9 |
| 25.05.2017 | 21:00:00 | 15,8 |
| 25.05.2017 | 22:00:00 | 15,7 |
| 25.05.2017 | 23:00:00 | 15,6 |
| 26.05.2017 | 00:00:00 | 15,5 |
| 26.05.2017 | 01:00:00 | 15,5 |
| 26.05.2017 | 02:00:00 | 15,4 |
| 26.05.2017 | 03:00:00 | 15,4 |
| 26.05.2017 | 04:00:00 | 15,4 |
| 26.05.2017 | 05:00:00 | 15,4 |
| 26.05.2017 | 06:00:00 | 15,5 |
| 26.05.2017 | 07:00:00 | 15,6 |
| 26.05.2017 | 08:00:00 | 15,8 |

|            |          |      |
|------------|----------|------|
| 26.05.2017 | 09:00:00 | 15,9 |
| 26.05.2017 | 10:00:00 | 16,1 |
| 26.05.2017 | 11:00:00 | 16,2 |
| 26.05.2017 | 12:00:00 | 16,3 |
| 26.05.2017 | 13:00:00 | 16,4 |
| 26.05.2017 | 14:00:00 | 16,4 |
| 26.05.2017 | 15:00:00 | 16,4 |
| 26.05.2017 | 16:00:00 | 16,4 |
| 26.05.2017 | 17:00:00 | 16,3 |
| 26.05.2017 | 18:00:00 | 16,2 |
| 26.05.2017 | 19:00:00 | 16,2 |
| 26.05.2017 | 20:00:00 | 16,1 |
| 26.05.2017 | 21:00:00 | 16,1 |
| 26.05.2017 | 22:00:00 | 16   |
| 26.05.2017 | 23:00:00 | 16   |
| 27.05.2017 | 00:00:00 | 15,9 |
| 27.05.2017 | 01:00:00 | 15,9 |
| 27.05.2017 | 02:00:00 | 15,8 |
| 27.05.2017 | 03:00:00 | 15,8 |
| 27.05.2017 | 04:00:00 | 15,7 |
| 27.05.2017 | 05:00:00 | 15,7 |
| 27.05.2017 | 06:00:00 | 15,7 |
| 27.05.2017 | 07:00:00 | 15,8 |
| 27.05.2017 | 08:00:00 | 15,8 |
| 27.05.2017 | 09:00:00 | 15,9 |
| 27.05.2017 | 10:00:00 | 16,1 |
| 27.05.2017 | 11:00:00 | 16,2 |
| 27.05.2017 | 12:00:00 | 16,4 |
| 27.05.2017 | 13:00:00 | 16,4 |
| 27.05.2017 | 14:00:00 | 16,4 |
| 27.05.2017 | 15:00:00 | 16,5 |
| 27.05.2017 | 16:00:00 | 16,5 |
| 27.05.2017 | 17:00:00 | 16,5 |
| 27.05.2017 | 18:00:00 | 16,5 |
| 27.05.2017 | 19:00:00 | 16,5 |
| 27.05.2017 | 20:00:00 | 16,4 |
| 27.05.2017 | 21:00:00 | 16,4 |
| 27.05.2017 | 22:00:00 | 16,3 |
| 27.05.2017 | 23:00:00 | 16,3 |
| 28.05.2017 | 00:00:00 | 16,2 |
| 28.05.2017 | 01:00:00 | 16,2 |
| 28.05.2017 | 02:00:00 | 16,1 |
| 28.05.2017 | 03:00:00 | 16,1 |
| 28.05.2017 | 04:00:00 | 16   |
| 28.05.2017 | 05:00:00 | 16   |
| 28.05.2017 | 06:00:00 | 16   |

|            |          |      |
|------------|----------|------|
| 28.05.2017 | 07:00:00 | 16   |
| 28.05.2017 | 08:00:00 | 16,1 |
| 28.05.2017 | 09:00:00 | 16,2 |
| 28.05.2017 | 10:00:00 | 16,4 |
| 28.05.2017 | 11:00:00 | 16,5 |
| 28.05.2017 | 12:00:00 | 16,7 |
| 28.05.2017 | 13:00:00 | 16,8 |
| 28.05.2017 | 14:00:00 | 16,8 |
| 28.05.2017 | 15:00:00 | 16,9 |
| 28.05.2017 | 16:00:00 | 16,9 |
| 28.05.2017 | 17:00:00 | 16,9 |
| 28.05.2017 | 18:00:00 | 16,9 |
| 28.05.2017 | 19:00:00 | 16,8 |
| 28.05.2017 | 20:00:00 | 16,8 |
| 28.05.2017 | 21:00:00 | 16,8 |
| 28.05.2017 | 22:00:00 | 16,7 |
| 28.05.2017 | 23:00:00 | 16,7 |
| 29.05.2017 | 00:00:00 | 16,7 |
| 29.05.2017 | 01:00:00 | 16,7 |
| 29.05.2017 | 02:00:00 | 16,7 |
| 29.05.2017 | 03:00:00 | 16,7 |
| 29.05.2017 | 04:00:00 | 16,6 |
| 29.05.2017 | 05:00:00 | 16,5 |
| 29.05.2017 | 06:00:00 | 16,5 |
| 29.05.2017 | 07:00:00 | 16,6 |
| 29.05.2017 | 08:00:00 | 16,7 |
| 29.05.2017 | 09:00:00 | 16,8 |
| 29.05.2017 | 10:00:00 | 17   |
| 29.05.2017 | 11:00:00 | 17   |
| 29.05.2017 | 12:00:00 | 17,1 |
| 29.05.2017 | 13:00:00 | 17,2 |
| 29.05.2017 | 14:00:00 | 17,2 |
| 29.05.2017 | 15:00:00 | 17,2 |
| 29.05.2017 | 16:00:00 | 17,2 |
| 29.05.2017 | 17:00:00 | 17,2 |
| 29.05.2017 | 18:00:00 | 17,2 |
| 29.05.2017 | 19:00:00 | 17,2 |
| 29.05.2017 | 20:00:00 | 17,2 |
| 29.05.2017 | 21:00:00 | 17,2 |
| 29.05.2017 | 22:00:00 | 17,2 |
| 29.05.2017 | 23:00:00 | 17,2 |
| 30.05.2017 | 00:00:00 | 17,2 |
| 30.05.2017 | 01:00:00 | 17,2 |
| 30.05.2017 | 02:00:00 | 17,2 |
| 30.05.2017 | 03:00:00 | 17,2 |
| 30.05.2017 | 04:00:00 | 17,1 |

|            |          |      |
|------------|----------|------|
| 30.05.2017 | 05:00:00 | 17,1 |
| 30.05.2017 | 06:00:00 | 17   |
| 30.05.2017 | 07:00:00 | 17   |
| 30.05.2017 | 08:00:00 | 17,1 |
| 30.05.2017 | 09:00:00 | 17,3 |
| 30.05.2017 | 10:00:00 | 17,3 |
| 30.05.2017 | 11:00:00 | 17,4 |
| 30.05.2017 | 12:00:00 | 17,5 |
| 30.05.2017 | 13:00:00 | 17,5 |
| 30.05.2017 | 14:00:00 | 17,5 |
| 30.05.2017 | 15:00:00 | 17,5 |
| 30.05.2017 | 16:00:00 | 17,6 |
| 30.05.2017 | 17:00:00 | 17,6 |
| 30.05.2017 | 18:00:00 | 17,6 |
| 30.05.2017 | 19:00:00 | 17,6 |
| 30.05.2017 | 20:00:00 | 17,6 |
| 30.05.2017 | 21:00:00 | 17,6 |
| 30.05.2017 | 22:00:00 | 17,6 |
| 30.05.2017 | 23:00:00 | 17,6 |
| 31.05.2017 | 00:00:00 | 17,7 |
| 31.05.2017 | 01:00:00 | 17,6 |
| 31.05.2017 | 02:00:00 | 17,6 |
| 31.05.2017 | 03:00:00 | 17,6 |
| 31.05.2017 | 04:00:00 | 17,5 |
| 31.05.2017 | 05:00:00 | 17,5 |
| 31.05.2017 | 06:00:00 | 17,4 |
| 31.05.2017 | 07:00:00 | 17,4 |
| 31.05.2017 | 08:00:00 | 17,5 |
| 31.05.2017 | 09:00:00 | 17,6 |
| 31.05.2017 | 10:00:00 | 17,8 |
| 31.05.2017 | 11:00:00 | 17,7 |
| 31.05.2017 | 12:00:00 | 17,9 |
| 31.05.2017 | 13:00:00 | 17,9 |
| 31.05.2017 | 14:00:00 | 17,8 |
| 31.05.2017 | 15:00:00 | 17,8 |
| 31.05.2017 | 16:00:00 | 17,7 |
| 31.05.2017 | 17:00:00 | 17,8 |
| 31.05.2017 | 18:00:00 | 17,9 |
| 31.05.2017 | 19:00:00 | 17,9 |
| 31.05.2017 | 20:00:00 | 17,9 |
| 31.05.2017 | 21:00:00 | 17,9 |
| 31.05.2017 | 22:00:00 | 17,9 |
| 31.05.2017 | 23:00:00 | 17,8 |
| 01.04.2018 | 00:00:00 | 7,2  |
| 01.04.2018 | 01:00:00 | 7,2  |
| 01.04.2018 | 02:00:00 | 7,3  |

|            |          |     |
|------------|----------|-----|
| 01.04.2018 | 03:00:00 | 7,3 |
| 01.04.2018 | 04:00:00 | 7,3 |
| 01.04.2018 | 05:00:00 | 7,2 |
| 01.04.2018 | 06:00:00 | 7,2 |
| 01.04.2018 | 07:00:00 | 7,2 |
| 01.04.2018 | 08:00:00 | 7,2 |
| 01.04.2018 | 09:00:00 | 7,2 |
| 01.04.2018 | 10:00:00 | 7,3 |
| 01.04.2018 | 11:00:00 | 7,3 |
| 01.04.2018 | 12:00:00 | 7,3 |
| 01.04.2018 | 13:00:00 | 7,2 |
| 01.04.2018 | 14:00:00 | 7,3 |
| 01.04.2018 | 15:00:00 | 7,2 |
| 01.04.2018 | 16:00:00 | 7,3 |
| 01.04.2018 | 17:00:00 | 7,2 |
| 01.04.2018 | 18:00:00 | 7,2 |
| 01.04.2018 | 19:00:00 | 7,2 |
| 01.04.2018 | 20:00:00 | 7,2 |
| 01.04.2018 | 21:00:00 | 7,2 |
| 01.04.2018 | 22:00:00 | 7,2 |
| 01.04.2018 | 23:00:00 | 7,2 |
| 02.04.2018 | 00:00:00 | 7,2 |
| 02.04.2018 | 01:00:00 | 7,2 |
| 02.04.2018 | 02:00:00 | 7,2 |
| 02.04.2018 | 03:00:00 | 7,2 |
| 02.04.2018 | 04:00:00 | 7,2 |
| 02.04.2018 | 05:00:00 | 7,2 |
| 02.04.2018 | 06:00:00 | 7,1 |
| 02.04.2018 | 07:00:00 | 7,2 |
| 02.04.2018 | 08:00:00 | 7,2 |
| 02.04.2018 | 09:00:00 | 7,2 |
| 02.04.2018 | 10:00:00 | 7,3 |
| 02.04.2018 | 11:00:00 | 7,4 |
| 02.04.2018 | 12:00:00 | 7,4 |
| 02.04.2018 | 13:00:00 | 7,4 |
| 02.04.2018 | 14:00:00 | 7,5 |
| 02.04.2018 | 15:00:00 | 7,5 |
| 02.04.2018 | 16:00:00 | 7,6 |
| 02.04.2018 | 17:00:00 | 7,6 |
| 02.04.2018 | 18:00:00 | 7,6 |
| 02.04.2018 | 19:00:00 | 7,6 |
| 02.04.2018 | 20:00:00 | 7,6 |
| 02.04.2018 | 21:00:00 | 7,6 |
| 02.04.2018 | 22:00:00 | 7,6 |
| 02.04.2018 | 23:00:00 | 7,7 |
| 03.04.2018 | 00:00:00 | 7,7 |



|            |          |     |
|------------|----------|-----|
| 03.04.2018 | 01:00:00 | 7,6 |
| 03.04.2018 | 02:00:00 | 7,6 |
| 03.04.2018 | 03:00:00 | 7,6 |
| 03.04.2018 | 04:00:00 | 7,5 |
| 03.04.2018 | 05:00:00 | 7,5 |
| 03.04.2018 | 06:00:00 | 7,5 |
| 03.04.2018 | 07:00:00 | 7,5 |
| 03.04.2018 | 08:00:00 | 7,5 |
| 03.04.2018 | 09:00:00 | 7,6 |
| 03.04.2018 | 10:00:00 | 7,7 |
| 03.04.2018 | 11:00:00 | 8   |
| 03.04.2018 | 12:00:00 | 8   |
| 03.04.2018 | 13:00:00 | 8   |
| 03.04.2018 | 14:00:00 | 8   |
| 03.04.2018 | 15:00:00 | 8   |
| 03.04.2018 | 16:00:00 | 8,1 |
| 03.04.2018 | 17:00:00 | 8   |
| 03.04.2018 | 18:00:00 | 8   |
| 03.04.2018 | 19:00:00 | 8   |
| 03.04.2018 | 20:00:00 | 8   |
| 03.04.2018 | 21:00:00 | 8   |
| 03.04.2018 | 22:00:00 | 8   |
| 03.04.2018 | 23:00:00 | 8   |
| 04.04.2018 | 00:00:00 | 8,1 |
| 04.04.2018 | 01:00:00 | 8,1 |
| 04.04.2018 | 02:00:00 | 8,1 |
| 04.04.2018 | 03:00:00 | 8,1 |
| 04.04.2018 | 04:00:00 | 8,1 |
| 04.04.2018 | 05:00:00 | 8,1 |
| 04.04.2018 | 06:00:00 | 8,1 |
| 04.04.2018 | 07:00:00 | 8,1 |
| 04.04.2018 | 08:00:00 | 8,1 |
| 04.04.2018 | 09:00:00 | 8,2 |
| 04.04.2018 | 10:00:00 | 8,2 |
| 04.04.2018 | 11:00:00 | 8,3 |
| 04.04.2018 | 12:00:00 | 8,4 |
| 04.04.2018 | 13:00:00 | 8,4 |
| 04.04.2018 | 14:00:00 | 8,5 |
| 04.04.2018 | 15:00:00 | 8,5 |
| 04.04.2018 | 16:00:00 | 8,5 |
| 04.04.2018 | 17:00:00 | 8,5 |
| 04.04.2018 | 18:00:00 | 8,5 |
| 04.04.2018 | 19:00:00 | 8,5 |
| 04.04.2018 | 20:00:00 | 8,5 |
| 04.04.2018 | 21:00:00 | 8,5 |
| 04.04.2018 | 22:00:00 | 8,5 |

|            |          |     |
|------------|----------|-----|
| 04.04.2018 | 23:00:00 | 8,5 |
| 05.04.2018 | 00:00:00 | 8,6 |
| 05.04.2018 | 01:00:00 | 8,6 |
| 05.04.2018 | 02:00:00 | 8,6 |
| 05.04.2018 | 03:00:00 | 8,6 |
| 05.04.2018 | 04:00:00 | 8,6 |
| 05.04.2018 | 05:00:00 | 8,6 |
| 05.04.2018 | 06:00:00 | 8,6 |
| 05.04.2018 | 07:00:00 | 8,6 |
| 05.04.2018 | 08:00:00 | 8,7 |
| 05.04.2018 | 09:00:00 | 8,6 |
| 05.04.2018 | 10:00:00 | 8,6 |
| 05.04.2018 | 11:00:00 | 8,6 |
| 05.04.2018 | 12:00:00 | 8,6 |
| 05.04.2018 | 13:00:00 | 8,6 |
| 05.04.2018 | 14:00:00 | 8,7 |
| 05.04.2018 | 15:00:00 | 8,7 |
| 05.04.2018 | 16:00:00 | 8,7 |
| 05.04.2018 | 17:00:00 | 8,8 |
| 05.04.2018 | 18:00:00 | 8,8 |
| 05.04.2018 | 19:00:00 | 8,9 |
| 05.04.2018 | 20:00:00 | 8,9 |
| 05.04.2018 | 21:00:00 | 9   |
| 05.04.2018 | 22:00:00 | 9   |
| 05.04.2018 | 23:00:00 | 9   |
| 06.04.2018 | 00:00:00 | 9   |
| 06.04.2018 | 01:00:00 | 9   |
| 06.04.2018 | 02:00:00 | 8,9 |
| 06.04.2018 | 03:00:00 | 8,9 |
| 06.04.2018 | 04:00:00 | 8,8 |
| 06.04.2018 | 05:00:00 | 8,8 |
| 06.04.2018 | 06:00:00 | 8,7 |
| 06.04.2018 | 07:00:00 | 8,8 |
| 06.04.2018 | 08:00:00 | 8,8 |
| 06.04.2018 | 09:00:00 | 8,8 |
| 06.04.2018 | 10:00:00 | 8,9 |
| 06.04.2018 | 11:00:00 | 8,9 |
| 06.04.2018 | 12:00:00 | 9   |
| 06.04.2018 | 13:00:00 | 9,1 |
| 06.04.2018 | 14:00:00 | 9,1 |
| 06.04.2018 | 15:00:00 | 9,2 |
| 06.04.2018 | 16:00:00 | 9,3 |
| 06.04.2018 | 17:00:00 | 9,3 |
| 06.04.2018 | 18:00:00 | 9,2 |
| 06.04.2018 | 19:00:00 | 9,2 |
| 06.04.2018 | 20:00:00 | 9,2 |

|            |          |      |
|------------|----------|------|
| 06.04.2018 | 21:00:00 | 9,1  |
| 06.04.2018 | 22:00:00 | 9,1  |
| 06.04.2018 | 23:00:00 | 9,1  |
| 07.04.2018 | 00:00:00 | 9,1  |
| 07.04.2018 | 01:00:00 | 9,1  |
| 07.04.2018 | 02:00:00 | 9,1  |
| 07.04.2018 | 03:00:00 | 9    |
| 07.04.2018 | 04:00:00 | 9    |
| 07.04.2018 | 05:00:00 | 9    |
| 07.04.2018 | 06:00:00 | 9    |
| 07.04.2018 | 07:00:00 | 9    |
| 07.04.2018 | 08:00:00 | 9    |
| 07.04.2018 | 09:00:00 | 9,1  |
| 07.04.2018 | 10:00:00 | 9,2  |
| 07.04.2018 | 11:00:00 | 9,3  |
| 07.04.2018 | 12:00:00 | 9,4  |
| 07.04.2018 | 13:00:00 | 9,5  |
| 07.04.2018 | 14:00:00 | 9,5  |
| 07.04.2018 | 15:00:00 | 9,6  |
| 07.04.2018 | 16:00:00 | 9,6  |
| 07.04.2018 | 17:00:00 | 9,6  |
| 07.04.2018 | 18:00:00 | 9,6  |
| 07.04.2018 | 19:00:00 | 9,6  |
| 07.04.2018 | 20:00:00 | 9,6  |
| 07.04.2018 | 21:00:00 | 9,6  |
| 07.04.2018 | 22:00:00 | 9,6  |
| 07.04.2018 | 23:00:00 | 9,5  |
| 08.04.2018 | 00:00:00 | 9,5  |
| 08.04.2018 | 01:00:00 | 9,5  |
| 08.04.2018 | 02:00:00 | 9,5  |
| 08.04.2018 | 03:00:00 | 9,5  |
| 08.04.2018 | 04:00:00 | 9,5  |
| 08.04.2018 | 05:00:00 | 9,4  |
| 08.04.2018 | 06:00:00 | 9,4  |
| 08.04.2018 | 07:00:00 | 9,4  |
| 08.04.2018 | 08:00:00 | 9,4  |
| 08.04.2018 | 09:00:00 | 9,5  |
| 08.04.2018 | 10:00:00 | 9,6  |
| 08.04.2018 | 11:00:00 | 9,7  |
| 08.04.2018 | 12:00:00 | 9,9  |
| 08.04.2018 | 13:00:00 | 10   |
| 08.04.2018 | 14:00:00 | 10   |
| 08.04.2018 | 15:00:00 | 10   |
| 08.04.2018 | 16:00:00 | 10,1 |
| 08.04.2018 | 17:00:00 | 10,1 |
| 08.04.2018 | 18:00:00 | 10   |

|            |          |      |
|------------|----------|------|
| 08.04.2018 | 19:00:00 | 10   |
| 08.04.2018 | 20:00:00 | 10   |
| 08.04.2018 | 21:00:00 | 10   |
| 08.04.2018 | 22:00:00 | 10,1 |
| 08.04.2018 | 23:00:00 | 10,1 |
| 09.04.2018 | 00:00:00 | 10,1 |
| 09.04.2018 | 01:00:00 | 10,1 |
| 09.04.2018 | 02:00:00 | 10,1 |
| 09.04.2018 | 03:00:00 | 10,1 |
| 09.04.2018 | 04:00:00 | 10   |
| 09.04.2018 | 05:00:00 | 10   |
| 09.04.2018 | 06:00:00 | 10   |
| 09.04.2018 | 07:00:00 | 10   |
| 09.04.2018 | 08:00:00 | 10   |
| 09.04.2018 | 09:00:00 | 10,1 |
| 09.04.2018 | 10:00:00 | 10,2 |
| 09.04.2018 | 11:00:00 | 10,4 |
| 09.04.2018 | 12:00:00 | 10,5 |
| 09.04.2018 | 13:00:00 | 10,6 |
| 09.04.2018 | 14:00:00 | 10,7 |
| 09.04.2018 | 15:00:00 | 10,8 |
| 09.04.2018 | 16:00:00 | 10,8 |
| 09.04.2018 | 17:00:00 | 10,8 |
| 09.04.2018 | 18:00:00 | 10,8 |
| 09.04.2018 | 19:00:00 | 10,8 |
| 09.04.2018 | 20:00:00 | 10,8 |
| 09.04.2018 | 21:00:00 | 10,8 |
| 09.04.2018 | 22:00:00 | 10,8 |
| 09.04.2018 | 23:00:00 | 10,8 |
| 10.04.2018 | 00:00:00 | 10,8 |
| 10.04.2018 | 01:00:00 | 10,8 |
| 10.04.2018 | 02:00:00 | 10,8 |
| 10.04.2018 | 03:00:00 | 10,8 |
| 10.04.2018 | 04:00:00 | 10,7 |
| 10.04.2018 | 05:00:00 | 10,7 |
| 10.04.2018 | 06:00:00 | 10,6 |
| 10.04.2018 | 07:00:00 | 10,6 |
| 10.04.2018 | 08:00:00 | 10,6 |
| 10.04.2018 | 09:00:00 | 10,7 |
| 10.04.2018 | 10:00:00 | 10,8 |
| 10.04.2018 | 11:00:00 | 10,9 |
| 10.04.2018 | 12:00:00 | 11,1 |
| 10.04.2018 | 13:00:00 | 11,1 |
| 10.04.2018 | 14:00:00 | 11,2 |
| 10.04.2018 | 15:00:00 | 11,2 |
| 10.04.2018 | 16:00:00 | 11,3 |

|            |          |      |
|------------|----------|------|
| 10.04.2018 | 17:00:00 | 11,3 |
| 10.04.2018 | 18:00:00 | 11,3 |
| 10.04.2018 | 19:00:00 | 11,3 |
| 10.04.2018 | 20:00:00 | 11,3 |
| 10.04.2018 | 21:00:00 | 11,2 |
| 10.04.2018 | 22:00:00 | 11,2 |
| 10.04.2018 | 23:00:00 | 11,2 |
| 11.04.2018 | 00:00:00 | 11,1 |
| 11.04.2018 | 01:00:00 | 11,1 |
| 11.04.2018 | 02:00:00 | 11   |
| 11.04.2018 | 03:00:00 | 11   |
| 11.04.2018 | 04:00:00 | 10,9 |
| 11.04.2018 | 05:00:00 | 10,9 |
| 11.04.2018 | 06:00:00 | 10,8 |
| 11.04.2018 | 07:00:00 | 10,8 |
| 11.04.2018 | 08:00:00 | 10,9 |
| 11.04.2018 | 09:00:00 | 10,9 |
| 11.04.2018 | 10:00:00 | 11   |
| 11.04.2018 | 11:00:00 | 11,2 |
| 11.04.2018 | 12:00:00 | 11,3 |
| 11.04.2018 | 13:00:00 | 11,4 |
| 11.04.2018 | 14:00:00 | 11,4 |
| 11.04.2018 | 15:00:00 | 11,5 |
| 11.04.2018 | 16:00:00 | 11,6 |
| 11.04.2018 | 17:00:00 | 11,6 |
| 11.04.2018 | 18:00:00 | 11,5 |
| 11.04.2018 | 19:00:00 | 11,4 |
| 11.04.2018 | 20:00:00 | 11,4 |
| 11.04.2018 | 21:00:00 | 11,3 |
| 11.04.2018 | 22:00:00 | 11,3 |
| 11.04.2018 | 23:00:00 | 11,2 |
| 12.04.2018 | 00:00:00 | 11,2 |
| 12.04.2018 | 01:00:00 | 11,1 |
| 12.04.2018 | 02:00:00 | 11,1 |
| 12.04.2018 | 03:00:00 | 11,1 |
| 12.04.2018 | 04:00:00 | 11   |
| 12.04.2018 | 05:00:00 | 11   |
| 12.04.2018 | 06:00:00 | 11   |
| 12.04.2018 | 07:00:00 | 11   |
| 12.04.2018 | 08:00:00 | 11   |
| 12.04.2018 | 09:00:00 | 11,1 |
| 12.04.2018 | 10:00:00 | 11,2 |
| 12.04.2018 | 11:00:00 | 11,4 |
| 12.04.2018 | 12:00:00 | 11,5 |
| 12.04.2018 | 13:00:00 | 11,7 |
| 12.04.2018 | 14:00:00 | 11,8 |

|            |          |      |
|------------|----------|------|
| 12.04.2018 | 15:00:00 | 11,8 |
| 12.04.2018 | 16:00:00 | 11,9 |
| 12.04.2018 | 17:00:00 | 11,9 |
| 12.04.2018 | 18:00:00 | 11,9 |
| 12.04.2018 | 19:00:00 | 11,8 |
| 12.04.2018 | 20:00:00 | 11,7 |
| 12.04.2018 | 21:00:00 | 11,7 |
| 12.04.2018 | 22:00:00 | 11,6 |
| 12.04.2018 | 23:00:00 | 11,6 |
| 13.04.2018 | 00:00:00 | 11,6 |
| 13.04.2018 | 01:00:00 | 11,5 |
| 13.04.2018 | 02:00:00 | 11,5 |
| 13.04.2018 | 03:00:00 | 11,5 |
| 13.04.2018 | 04:00:00 | 11,5 |
| 13.04.2018 | 05:00:00 | 11,4 |
| 13.04.2018 | 06:00:00 | 11,4 |
| 13.04.2018 | 07:00:00 | 11,4 |
| 13.04.2018 | 08:00:00 | 11,5 |
| 13.04.2018 | 09:00:00 | 11,6 |
| 13.04.2018 | 10:00:00 | 11,7 |
| 13.04.2018 | 11:00:00 | 11,9 |
| 13.04.2018 | 12:00:00 | 12   |
| 13.04.2018 | 13:00:00 | 12,4 |
| 13.04.2018 | 14:00:00 | 12,4 |
| 13.04.2018 | 15:00:00 | 12,5 |
| 13.04.2018 | 16:00:00 | 12,5 |
| 13.04.2018 | 17:00:00 | 12,5 |
| 13.04.2018 | 18:00:00 | 12,4 |
| 13.04.2018 | 19:00:00 | 12,3 |
| 13.04.2018 | 20:00:00 | 12,2 |
| 13.04.2018 | 21:00:00 | 12,1 |
| 13.04.2018 | 22:00:00 | 12,1 |
| 13.04.2018 | 23:00:00 | 12   |
| 14.04.2018 | 00:00:00 | 12   |
| 14.04.2018 | 01:00:00 | 11,9 |
| 14.04.2018 | 02:00:00 | 11,9 |
| 14.04.2018 | 03:00:00 | 11,9 |
| 14.04.2018 | 04:00:00 | 11,8 |
| 14.04.2018 | 05:00:00 | 11,8 |
| 14.04.2018 | 06:00:00 | 11,8 |
| 14.04.2018 | 07:00:00 | 11,8 |
| 14.04.2018 | 08:00:00 | 11,9 |
| 14.04.2018 | 09:00:00 | 12,1 |
| 14.04.2018 | 10:00:00 | 12,3 |
| 14.04.2018 | 11:00:00 | 12,4 |
| 14.04.2018 | 12:00:00 | 12,5 |

|            |          |      |
|------------|----------|------|
| 14.04.2018 | 13:00:00 | 12,6 |
| 14.04.2018 | 14:00:00 | 12,6 |
| 14.04.2018 | 15:00:00 | 12,6 |
| 14.04.2018 | 16:00:00 | 12,6 |
| 14.04.2018 | 17:00:00 | 12,5 |
| 14.04.2018 | 18:00:00 | 12,4 |
| 14.04.2018 | 19:00:00 | 12,3 |
| 14.04.2018 | 20:00:00 | 12,3 |
| 14.04.2018 | 21:00:00 | 12,2 |
| 14.04.2018 | 22:00:00 | 12,1 |
| 14.04.2018 | 23:00:00 | 12,1 |
| 15.04.2018 | 00:00:00 | 12   |
| 15.04.2018 | 01:00:00 | 12   |
| 15.04.2018 | 02:00:00 | 11,9 |
| 15.04.2018 | 03:00:00 | 11,9 |
| 15.04.2018 | 04:00:00 | 11,9 |
| 15.04.2018 | 05:00:00 | 11,8 |
| 15.04.2018 | 06:00:00 | 11,8 |
| 15.04.2018 | 07:00:00 | 11,8 |
| 15.04.2018 | 08:00:00 | 11,8 |
| 15.04.2018 | 09:00:00 | 11,9 |
| 15.04.2018 | 10:00:00 | 12   |
| 15.04.2018 | 11:00:00 | 12,2 |
| 15.04.2018 | 12:00:00 | 12,2 |
| 15.04.2018 | 13:00:00 | 12,3 |
| 15.04.2018 | 14:00:00 | 12,4 |
| 15.04.2018 | 15:00:00 | 12,4 |
| 15.04.2018 | 16:00:00 | 12,4 |
| 15.04.2018 | 17:00:00 | 12,4 |
| 15.04.2018 | 18:00:00 | 12,4 |
| 15.04.2018 | 19:00:00 | 12,3 |
| 15.04.2018 | 20:00:00 | 12,3 |
| 15.04.2018 | 21:00:00 | 12,2 |
| 15.04.2018 | 22:00:00 | 12,2 |
| 15.04.2018 | 23:00:00 | 12,1 |
| 16.04.2018 | 00:00:00 | 12,1 |
| 16.04.2018 | 01:00:00 | 12,1 |
| 16.04.2018 | 02:00:00 | 12,1 |
| 16.04.2018 | 03:00:00 | 12   |
| 16.04.2018 | 04:00:00 | 12   |
| 16.04.2018 | 05:00:00 | 12   |
| 16.04.2018 | 06:00:00 | 12   |
| 16.04.2018 | 07:00:00 | 11,9 |
| 16.04.2018 | 08:00:00 | 12   |
| 16.04.2018 | 09:00:00 | 12   |
| 16.04.2018 | 10:00:00 | 12   |

|            |          |      |
|------------|----------|------|
| 16.04.2018 | 11:00:00 | 12,1 |
| 16.04.2018 | 12:00:00 | 12,2 |
| 16.04.2018 | 13:00:00 | 12,3 |
| 16.04.2018 | 14:00:00 | 12,3 |
| 16.04.2018 | 15:00:00 | 12,3 |
| 16.04.2018 | 16:00:00 | 12,3 |
| 16.04.2018 | 17:00:00 | 12,3 |
| 16.04.2018 | 18:00:00 | 12,3 |
| 16.04.2018 | 19:00:00 | 12,3 |
| 16.04.2018 | 20:00:00 | 12,2 |
| 16.04.2018 | 21:00:00 | 12,2 |
| 16.04.2018 | 22:00:00 | 12,2 |
| 16.04.2018 | 23:00:00 | 12,1 |
| 17.04.2018 | 00:00:00 | 12,1 |
| 17.04.2018 | 01:00:00 | 12,1 |
| 17.04.2018 | 02:00:00 | 12   |
| 17.04.2018 | 03:00:00 | 12   |
| 17.04.2018 | 04:00:00 | 12   |
| 17.04.2018 | 05:00:00 | 12   |
| 17.04.2018 | 06:00:00 | 12   |
| 17.04.2018 | 07:00:00 | 12   |
| 17.04.2018 | 08:00:00 | 12,1 |
| 17.04.2018 | 09:00:00 | 12,2 |
| 17.04.2018 | 10:00:00 | 12,3 |
| 17.04.2018 | 11:00:00 | 12,6 |
| 17.04.2018 | 12:00:00 | 12,6 |
| 17.04.2018 | 13:00:00 | 12,7 |
| 17.04.2018 | 14:00:00 | 12,7 |
| 17.04.2018 | 15:00:00 | 12,7 |
| 17.04.2018 | 16:00:00 | 12,7 |
| 17.04.2018 | 17:00:00 | 12,6 |
| 17.04.2018 | 18:00:00 | 12,5 |
| 17.04.2018 | 19:00:00 | 12,5 |
| 17.04.2018 | 20:00:00 | 12,4 |
| 17.04.2018 | 21:00:00 | 12,4 |
| 17.04.2018 | 22:00:00 | 12,3 |
| 17.04.2018 | 23:00:00 | 12,3 |
| 18.04.2018 | 00:00:00 | 12,2 |
| 18.04.2018 | 01:00:00 | 12,2 |
| 18.04.2018 | 02:00:00 | 12,1 |
| 18.04.2018 | 03:00:00 | 12,1 |
| 18.04.2018 | 04:00:00 | 12,1 |
| 18.04.2018 | 05:00:00 | 12   |
| 18.04.2018 | 06:00:00 | 12   |
| 18.04.2018 | 07:00:00 | 12,1 |
| 18.04.2018 | 08:00:00 | 12,1 |



|            |          |      |
|------------|----------|------|
| 18.04.2018 | 09:00:00 | 12,2 |
| 18.04.2018 | 10:00:00 | 12,4 |
| 18.04.2018 | 11:00:00 | 12,6 |
| 18.04.2018 | 12:00:00 | 12,7 |
| 18.04.2018 | 13:00:00 | 12,7 |
| 18.04.2018 | 14:00:00 | 12,8 |
| 18.04.2018 | 15:00:00 | 12,8 |
| 18.04.2018 | 16:00:00 | 12,8 |
| 18.04.2018 | 17:00:00 | 12,7 |
| 18.04.2018 | 18:00:00 | 12,7 |
| 18.04.2018 | 19:00:00 | 12,6 |
| 18.04.2018 | 20:00:00 | 12,5 |
| 18.04.2018 | 21:00:00 | 12,4 |
| 18.04.2018 | 22:00:00 | 12,3 |
| 18.04.2018 | 23:00:00 | 12,2 |
| 19.04.2018 | 00:00:00 | 12,2 |
| 19.04.2018 | 01:00:00 | 12,1 |
| 19.04.2018 | 02:00:00 | 12,1 |
| 19.04.2018 | 03:00:00 | 12   |
| 19.04.2018 | 04:00:00 | 12   |
| 19.04.2018 | 05:00:00 | 11,9 |
| 19.04.2018 | 06:00:00 | 11,9 |
| 19.04.2018 | 07:00:00 | 11,9 |
| 19.04.2018 | 08:00:00 | 12   |
| 19.04.2018 | 09:00:00 | 12,2 |
| 19.04.2018 | 10:00:00 | 12,3 |
| 19.04.2018 | 11:00:00 | 12,5 |
| 19.04.2018 | 12:00:00 | 12,7 |
| 19.04.2018 | 13:00:00 | 12,8 |
| 19.04.2018 | 14:00:00 | 12,9 |
| 19.04.2018 | 15:00:00 | 13   |
| 19.04.2018 | 16:00:00 | 13   |
| 19.04.2018 | 17:00:00 | 13   |
| 19.04.2018 | 18:00:00 | 12,9 |
| 19.04.2018 | 19:00:00 | 12,9 |
| 19.04.2018 | 20:00:00 | 12,8 |
| 19.04.2018 | 21:00:00 | 12,7 |
| 19.04.2018 | 22:00:00 | 12,7 |
| 19.04.2018 | 23:00:00 | 12,7 |
| 20.04.2018 | 00:00:00 | 12,6 |
| 20.04.2018 | 01:00:00 | 12,6 |
| 20.04.2018 | 02:00:00 | 12,5 |
| 20.04.2018 | 03:00:00 | 12,5 |
| 20.04.2018 | 04:00:00 | 12,5 |
| 20.04.2018 | 05:00:00 | 12,4 |
| 20.04.2018 | 06:00:00 | 12,4 |

|            |          |      |
|------------|----------|------|
| 20.04.2018 | 07:00:00 | 12,4 |
| 20.04.2018 | 08:00:00 | 12,5 |
| 20.04.2018 | 09:00:00 | 12,6 |
| 20.04.2018 | 10:00:00 | 12,9 |
| 20.04.2018 | 11:00:00 | 13   |
| 20.04.2018 | 12:00:00 | 13,1 |
| 20.04.2018 | 13:00:00 | 13,2 |
| 20.04.2018 | 14:00:00 | 13,2 |
| 20.04.2018 | 15:00:00 | 13,3 |
| 20.04.2018 | 16:00:00 | 13,3 |
| 20.04.2018 | 17:00:00 | 13,2 |
| 20.04.2018 | 18:00:00 | 13,2 |
| 20.04.2018 | 19:00:00 | 13,1 |
| 20.04.2018 | 20:00:00 | 13   |
| 20.04.2018 | 21:00:00 | 12,9 |
| 20.04.2018 | 22:00:00 | 12,9 |
| 20.04.2018 | 23:00:00 | 12,8 |
| 21.04.2018 | 00:00:00 | 12,8 |
| 21.04.2018 | 01:00:00 | 12,7 |
| 21.04.2018 | 02:00:00 | 12,7 |
| 21.04.2018 | 03:00:00 | 12,7 |
| 21.04.2018 | 04:00:00 | 12,6 |
| 21.04.2018 | 05:00:00 | 12,6 |
| 21.04.2018 | 06:00:00 | 12,6 |
| 21.04.2018 | 07:00:00 | 12,6 |
| 21.04.2018 | 08:00:00 | 12,7 |
| 21.04.2018 | 09:00:00 | 12,8 |
| 21.04.2018 | 10:00:00 | 13   |
| 21.04.2018 | 11:00:00 | 13,1 |
| 21.04.2018 | 12:00:00 | 13,3 |
| 21.04.2018 | 13:00:00 | 13,4 |
| 21.04.2018 | 14:00:00 | 13,5 |
| 21.04.2018 | 15:00:00 | 13,5 |
| 21.04.2018 | 16:00:00 | 13,5 |
| 21.04.2018 | 17:00:00 | 13,5 |
| 21.04.2018 | 18:00:00 | 13,4 |
| 21.04.2018 | 19:00:00 | 13,3 |
| 21.04.2018 | 20:00:00 | 13,3 |
| 21.04.2018 | 21:00:00 | 13,2 |
| 21.04.2018 | 22:00:00 | 13,2 |
| 21.04.2018 | 23:00:00 | 13,1 |
| 22.04.2018 | 00:00:00 | 13,1 |
| 22.04.2018 | 01:00:00 | 13,1 |
| 22.04.2018 | 02:00:00 | 13,1 |
| 22.04.2018 | 03:00:00 | 13,1 |
| 22.04.2018 | 04:00:00 | 13,1 |

|            |          |      |
|------------|----------|------|
| 22.04.2018 | 05:00:00 | 13,1 |
| 22.04.2018 | 06:00:00 | 13,1 |
| 22.04.2018 | 07:00:00 | 13,2 |
| 22.04.2018 | 08:00:00 | 13,3 |
| 22.04.2018 | 09:00:00 | 13,4 |
| 22.04.2018 | 10:00:00 | 13,6 |
| 22.04.2018 | 11:00:00 | 13,7 |
| 22.04.2018 | 12:00:00 | 13,9 |
| 22.04.2018 | 13:00:00 | 14   |
| 22.04.2018 | 14:00:00 | 14   |
| 22.04.2018 | 15:00:00 | 14   |
| 22.04.2018 | 16:00:00 | 14   |
| 22.04.2018 | 17:00:00 | 13,9 |
| 22.04.2018 | 18:00:00 | 13,9 |
| 22.04.2018 | 19:00:00 | 13,8 |
| 22.04.2018 | 20:00:00 | 13,7 |
| 22.04.2018 | 21:00:00 | 13,7 |
| 22.04.2018 | 22:00:00 | 13,6 |
| 22.04.2018 | 23:00:00 | 13,6 |
| 23.04.2018 | 00:00:00 | 13,6 |
| 23.04.2018 | 01:00:00 | 13,6 |
| 23.04.2018 | 02:00:00 | 13,6 |
| 23.04.2018 | 03:00:00 | 13,6 |
| 23.04.2018 | 04:00:00 | 13,6 |
| 23.04.2018 | 05:00:00 | 13,6 |
| 23.04.2018 | 06:00:00 | 13,5 |
| 23.04.2018 | 07:00:00 | 13,6 |
| 23.04.2018 | 08:00:00 | 13,6 |
| 23.04.2018 | 09:00:00 | 13,7 |
| 23.04.2018 | 10:00:00 | 13,8 |
| 23.04.2018 | 11:00:00 | 13,9 |
| 23.04.2018 | 12:00:00 | 14,1 |
| 23.04.2018 | 13:00:00 | 14,1 |
| 23.04.2018 | 14:00:00 | 14,1 |
| 23.04.2018 | 15:00:00 | 14,1 |
| 23.04.2018 | 16:00:00 | 14,1 |
| 23.04.2018 | 17:00:00 | 14   |
| 23.04.2018 | 18:00:00 | 14   |
| 23.04.2018 | 19:00:00 | 14   |
| 23.04.2018 | 20:00:00 | 13,9 |
| 23.04.2018 | 21:00:00 | 13,9 |
| 23.04.2018 | 22:00:00 | 13,9 |
| 23.04.2018 | 23:00:00 | 14   |
| 24.04.2018 | 00:00:00 | 14   |
| 24.04.2018 | 01:00:00 | 13,9 |
| 24.04.2018 | 02:00:00 | 13,9 |

|            |          |      |
|------------|----------|------|
| 24.04.2018 | 03:00:00 | 13,9 |
| 24.04.2018 | 04:00:00 | 13,9 |
| 24.04.2018 | 05:00:00 | 13,9 |
| 24.04.2018 | 06:00:00 | 13,9 |
| 24.04.2018 | 07:00:00 | 13,9 |
| 24.04.2018 | 08:00:00 | 13,9 |
| 24.04.2018 | 09:00:00 | 14   |
| 24.04.2018 | 10:00:00 | 14,2 |
| 24.04.2018 | 11:00:00 | 14,3 |
| 24.04.2018 | 12:00:00 | 14,4 |
| 24.04.2018 | 13:00:00 | 14,5 |
| 24.04.2018 | 14:00:00 | 14,5 |
| 24.04.2018 | 15:00:00 | 14,5 |
| 24.04.2018 | 16:00:00 | 14,5 |
| 24.04.2018 | 17:00:00 | 14,4 |
| 24.04.2018 | 18:00:00 | 14,4 |
| 24.04.2018 | 19:00:00 | 14,4 |
| 24.04.2018 | 20:00:00 | 14,3 |
| 24.04.2018 | 21:00:00 | 14,3 |
| 24.04.2018 | 22:00:00 | 14,3 |
| 24.04.2018 | 23:00:00 | 14,3 |
| 25.04.2018 | 00:00:00 | 14,3 |
| 25.04.2018 | 01:00:00 | 14,3 |
| 25.04.2018 | 02:00:00 | 14,3 |
| 25.04.2018 | 03:00:00 | 14,2 |
| 25.04.2018 | 04:00:00 | 14,2 |
| 25.04.2018 | 05:00:00 | 14,2 |
| 25.04.2018 | 06:00:00 | 14,2 |
| 25.04.2018 | 07:00:00 | 14,2 |
| 25.04.2018 | 08:00:00 | 14,2 |
| 25.04.2018 | 09:00:00 | 14,3 |
| 25.04.2018 | 10:00:00 | 14,4 |
| 25.04.2018 | 11:00:00 | 14,5 |
| 25.04.2018 | 12:00:00 | 14,6 |
| 25.04.2018 | 13:00:00 | 14,7 |
| 25.04.2018 | 14:00:00 | 14,7 |
| 25.04.2018 | 15:00:00 | 14,7 |
| 25.04.2018 | 16:00:00 | 14,7 |
| 25.04.2018 | 17:00:00 | 14,7 |
| 25.04.2018 | 18:00:00 | 14,7 |
| 25.04.2018 | 19:00:00 | 14,6 |
| 25.04.2018 | 20:00:00 | 14,6 |
| 25.04.2018 | 21:00:00 | 14,6 |
| 25.04.2018 | 22:00:00 | 14,6 |
| 25.04.2018 | 23:00:00 | 14,6 |
| 26.04.2018 | 00:00:00 | 14,5 |

|            |          |      |
|------------|----------|------|
| 26.04.2018 | 01:00:00 | 14,5 |
| 26.04.2018 | 02:00:00 | 14,4 |
| 26.04.2018 | 03:00:00 | 14,4 |
| 26.04.2018 | 04:00:00 | 14,4 |
| 26.04.2018 | 05:00:00 | 14,4 |
| 26.04.2018 | 06:00:00 | 14,3 |
| 26.04.2018 | 07:00:00 | 14,4 |
| 26.04.2018 | 08:00:00 | 14,4 |
| 26.04.2018 | 09:00:00 | 14,4 |
| 26.04.2018 | 10:00:00 | 14,4 |
| 26.04.2018 | 11:00:00 | 14,4 |
| 26.04.2018 | 12:00:00 | 14,4 |
| 26.04.2018 | 13:00:00 | 14,5 |
| 26.04.2018 | 14:00:00 | 14,4 |
| 26.04.2018 | 15:00:00 | 14,4 |
| 26.04.2018 | 16:00:00 | 14,4 |
| 26.04.2018 | 17:00:00 | 14,3 |
| 26.04.2018 | 18:00:00 | 14,3 |
| 26.04.2018 | 19:00:00 | 14,3 |
| 26.04.2018 | 20:00:00 | 14,2 |
| 26.04.2018 | 21:00:00 | 14,1 |
| 26.04.2018 | 22:00:00 | 14,1 |
| 26.04.2018 | 23:00:00 | 14   |
| 27.04.2018 | 00:00:00 | 14   |
| 27.04.2018 | 01:00:00 | 13,9 |
| 27.04.2018 | 02:00:00 | 13,9 |
| 27.04.2018 | 03:00:00 | 13,9 |
| 27.04.2018 | 04:00:00 | 13,8 |
| 27.04.2018 | 05:00:00 | 13,8 |
| 27.04.2018 | 06:00:00 | 13,8 |
| 27.04.2018 | 07:00:00 | 13,8 |
| 27.04.2018 | 08:00:00 | 13,8 |
| 27.04.2018 | 09:00:00 | 13,9 |
| 27.04.2018 | 10:00:00 | 14   |
| 27.04.2018 | 11:00:00 | 14,1 |
| 27.04.2018 | 12:00:00 | 14,1 |
| 27.04.2018 | 13:00:00 | 14,2 |
| 27.04.2018 | 14:00:00 | 14,2 |
| 27.04.2018 | 15:00:00 | 14,2 |
| 27.04.2018 | 16:00:00 | 14,2 |
| 27.04.2018 | 17:00:00 | 14,1 |
| 27.04.2018 | 18:00:00 | 14   |
| 27.04.2018 | 19:00:00 | 14   |
| 27.04.2018 | 20:00:00 | 14   |
| 27.04.2018 | 21:00:00 | 13,9 |
| 27.04.2018 | 22:00:00 | 13,9 |

|            |          |      |
|------------|----------|------|
| 27.04.2018 | 23:00:00 | 13,9 |
| 28.04.2018 | 00:00:00 | 13,8 |
| 28.04.2018 | 01:00:00 | 13,8 |
| 28.04.2018 | 02:00:00 | 13,8 |
| 28.04.2018 | 03:00:00 | 13,7 |
| 28.04.2018 | 04:00:00 | 13,7 |
| 28.04.2018 | 05:00:00 | 13,6 |
| 28.04.2018 | 06:00:00 | 13,6 |
| 28.04.2018 | 07:00:00 | 13,6 |
| 28.04.2018 | 08:00:00 | 13,7 |
| 28.04.2018 | 09:00:00 | 13,9 |
| 28.04.2018 | 10:00:00 | 13,9 |
| 28.04.2018 | 11:00:00 | 14,1 |
| 28.04.2018 | 12:00:00 | 14,2 |
| 28.04.2018 | 13:00:00 | 14,3 |
| 28.04.2018 | 14:00:00 | 14,3 |
| 28.04.2018 | 15:00:00 | 14,3 |
| 28.04.2018 | 16:00:00 | 14,4 |
| 28.04.2018 | 17:00:00 | 14,3 |
| 28.04.2018 | 18:00:00 | 14,3 |
| 28.04.2018 | 19:00:00 | 14,2 |
| 28.04.2018 | 20:00:00 | 14,2 |
| 28.04.2018 | 21:00:00 | 14,1 |
| 28.04.2018 | 22:00:00 | 14,1 |
| 28.04.2018 | 23:00:00 | 14   |
| 29.04.2018 | 00:00:00 | 14   |
| 29.04.2018 | 01:00:00 | 14   |
| 29.04.2018 | 02:00:00 | 14   |
| 29.04.2018 | 03:00:00 | 14   |
| 29.04.2018 | 04:00:00 | 13,9 |
| 29.04.2018 | 05:00:00 | 13,9 |
| 29.04.2018 | 06:00:00 | 13,9 |
| 29.04.2018 | 07:00:00 | 13,9 |
| 29.04.2018 | 08:00:00 | 14   |
| 29.04.2018 | 09:00:00 | 14,1 |
| 29.04.2018 | 10:00:00 | 14,2 |
| 29.04.2018 | 11:00:00 | 14,3 |
| 29.04.2018 | 12:00:00 | 14,4 |
| 29.04.2018 | 13:00:00 | 14,6 |
| 29.04.2018 | 14:00:00 | 14,6 |
| 29.04.2018 | 15:00:00 | 14,6 |
| 29.04.2018 | 16:00:00 | 14,6 |
| 29.04.2018 | 17:00:00 | 14,6 |
| 29.04.2018 | 18:00:00 | 14,5 |
| 29.04.2018 | 19:00:00 | 14,5 |
| 29.04.2018 | 20:00:00 | 14,4 |

|            |          |      |
|------------|----------|------|
| 29.04.2018 | 21:00:00 | 14,4 |
| 29.04.2018 | 22:00:00 | 14,4 |
| 29.04.2018 | 23:00:00 | 14,3 |
| 30.04.2018 | 00:00:00 | 14,3 |
| 30.04.2018 | 01:00:00 | 14,3 |
| 30.04.2018 | 02:00:00 | 14,3 |
| 30.04.2018 | 03:00:00 | 14,3 |
| 30.04.2018 | 04:00:00 | 14,2 |
| 30.04.2018 | 05:00:00 | 14,2 |
| 30.04.2018 | 06:00:00 | 14,2 |
| 30.04.2018 | 07:00:00 | 14,2 |
| 30.04.2018 | 08:00:00 | 14,3 |
| 30.04.2018 | 09:00:00 | 14,4 |
| 30.04.2018 | 10:00:00 | 14,4 |
| 30.04.2018 | 11:00:00 | 14,6 |
| 30.04.2018 | 12:00:00 | 14,7 |
| 30.04.2018 | 13:00:00 | 14,8 |
| 30.04.2018 | 14:00:00 | 14,8 |
| 30.04.2018 | 15:00:00 | 14,9 |
| 30.04.2018 | 16:00:00 | 14,9 |
| 30.04.2018 | 17:00:00 | 14,9 |
| 30.04.2018 | 18:00:00 | 14,8 |
| 30.04.2018 | 19:00:00 | 14,7 |
| 30.04.2018 | 20:00:00 | 14,6 |
| 30.04.2018 | 21:00:00 | 14,6 |
| 30.04.2018 | 22:00:00 | 14,5 |
| 30.04.2018 | 23:00:00 | 14,4 |
| 01.05.2018 | 00:00:00 | 14,4 |
| 01.05.2018 | 01:00:00 | 14,4 |
| 01.05.2018 | 02:00:00 | 14,3 |
| 01.05.2018 | 03:00:00 | 14,3 |
| 01.05.2018 | 04:00:00 | 14,2 |
| 01.05.2018 | 05:00:00 | 14,2 |
| 01.05.2018 | 06:00:00 | 14,1 |
| 01.05.2018 | 07:00:00 | 14,1 |
| 01.05.2018 | 08:00:00 | 14,2 |
| 01.05.2018 | 09:00:00 | 14,3 |
| 01.05.2018 | 10:00:00 | 14,3 |
| 01.05.2018 | 11:00:00 | 14,4 |
| 01.05.2018 | 12:00:00 | 14,5 |
| 01.05.2018 | 13:00:00 | 14,6 |
| 01.05.2018 | 14:00:00 | 14,6 |
| 01.05.2018 | 15:00:00 | 14,6 |
| 01.05.2018 | 16:00:00 | 14,6 |
| 01.05.2018 | 17:00:00 | 14,6 |
| 01.05.2018 | 18:00:00 | 14,6 |

|            |          |      |
|------------|----------|------|
| 01.05.2018 | 19:00:00 | 14,5 |
| 01.05.2018 | 20:00:00 | 14,4 |
| 01.05.2018 | 21:00:00 | 14,3 |
| 01.05.2018 | 22:00:00 | 14,3 |
| 01.05.2018 | 23:00:00 | 14,3 |
| 02.05.2018 | 00:00:00 | 14,3 |
| 02.05.2018 | 01:00:00 | 14,2 |
| 02.05.2018 | 02:00:00 | 14,2 |
| 02.05.2018 | 03:00:00 | 14,2 |
| 02.05.2018 | 04:00:00 | 14,1 |
| 02.05.2018 | 05:00:00 | 14,1 |
| 02.05.2018 | 06:00:00 | 14,1 |
| 02.05.2018 | 07:00:00 | 14,1 |
| 02.05.2018 | 08:00:00 | 14,2 |
| 02.05.2018 | 09:00:00 | 14,3 |
| 02.05.2018 | 10:00:00 | 14,5 |
| 02.05.2018 | 11:00:00 | 14,6 |
| 02.05.2018 | 12:00:00 | 14,7 |
| 02.05.2018 | 13:00:00 | 14,7 |
| 02.05.2018 | 14:00:00 | 14,8 |
| 02.05.2018 | 15:00:00 | 14,8 |
| 02.05.2018 | 16:00:00 | 14,9 |
| 02.05.2018 | 17:00:00 | 14,8 |
| 02.05.2018 | 18:00:00 | 14,7 |
| 02.05.2018 | 19:00:00 | 14,7 |
| 02.05.2018 | 20:00:00 | 14,6 |
| 02.05.2018 | 21:00:00 | 14,6 |
| 02.05.2018 | 22:00:00 | 14,6 |
| 02.05.2018 | 23:00:00 | 14,6 |
| 03.05.2018 | 00:00:00 | 14,6 |
| 03.05.2018 | 01:00:00 | 14,5 |
| 03.05.2018 | 02:00:00 | 14,5 |
| 03.05.2018 | 03:00:00 | 14,5 |
| 03.05.2018 | 04:00:00 | 14,5 |
| 03.05.2018 | 05:00:00 | 14,4 |
| 03.05.2018 | 06:00:00 | 14,4 |
| 03.05.2018 | 07:00:00 | 14,5 |
| 03.05.2018 | 08:00:00 | 14,6 |
| 03.05.2018 | 09:00:00 | 14,6 |
| 03.05.2018 | 10:00:00 | 14,8 |
| 03.05.2018 | 11:00:00 | 14,9 |
| 03.05.2018 | 12:00:00 | 15   |
| 03.05.2018 | 13:00:00 | 15,2 |
| 03.05.2018 | 14:00:00 | 15,2 |
| 03.05.2018 | 15:00:00 | 15,3 |
| 03.05.2018 | 16:00:00 | 15,3 |



|            |          |      |
|------------|----------|------|
| 03.05.2018 | 17:00:00 | 15,3 |
| 03.05.2018 | 18:00:00 | 15,2 |
| 03.05.2018 | 19:00:00 | 15,1 |
| 03.05.2018 | 20:00:00 | 15   |
| 03.05.2018 | 21:00:00 | 14,9 |
| 03.05.2018 | 22:00:00 | 14,8 |
| 03.05.2018 | 23:00:00 | 14,8 |
| 04.05.2018 | 00:00:00 | 14,7 |
| 04.05.2018 | 01:00:00 | 14,7 |
| 04.05.2018 | 02:00:00 | 14,7 |
| 04.05.2018 | 03:00:00 | 14,7 |
| 04.05.2018 | 04:00:00 | 14,6 |
| 04.05.2018 | 05:00:00 | 14,6 |
| 04.05.2018 | 06:00:00 | 14,6 |
| 04.05.2018 | 07:00:00 | 14,6 |
| 04.05.2018 | 08:00:00 | 14,6 |
| 04.05.2018 | 09:00:00 | 14,7 |
| 04.05.2018 | 10:00:00 | 14,8 |
| 04.05.2018 | 11:00:00 | 14,9 |
| 04.05.2018 | 12:00:00 | 14,9 |
| 04.05.2018 | 13:00:00 | 15   |
| 04.05.2018 | 14:00:00 | 15,1 |
| 04.05.2018 | 15:00:00 | 15,2 |
| 04.05.2018 | 16:00:00 | 15,2 |
| 04.05.2018 | 17:00:00 | 15,2 |
| 04.05.2018 | 18:00:00 | 15,1 |
| 04.05.2018 | 19:00:00 | 15,1 |
| 04.05.2018 | 20:00:00 | 15   |
| 04.05.2018 | 21:00:00 | 14,9 |
| 04.05.2018 | 22:00:00 | 14,8 |
| 04.05.2018 | 23:00:00 | 14,7 |
| 05.05.2018 | 00:00:00 | 14,7 |
| 05.05.2018 | 01:00:00 | 14,6 |
| 05.05.2018 | 02:00:00 | 14,6 |
| 05.05.2018 | 03:00:00 | 14,6 |
| 05.05.2018 | 04:00:00 | 14,6 |
| 05.05.2018 | 05:00:00 | 14,5 |
| 05.05.2018 | 06:00:00 | 14,5 |
| 05.05.2018 | 07:00:00 | 14,5 |
| 05.05.2018 | 08:00:00 | 14,6 |
| 05.05.2018 | 09:00:00 | 14,6 |
| 05.05.2018 | 10:00:00 | 14,7 |
| 05.05.2018 | 11:00:00 | 14,8 |
| 05.05.2018 | 12:00:00 | 14,9 |
| 05.05.2018 | 13:00:00 | 15   |
| 05.05.2018 | 14:00:00 | 14,9 |

|            |          |      |
|------------|----------|------|
| 05.05.2018 | 15:00:00 | 15   |
| 05.05.2018 | 16:00:00 | 15   |
| 05.05.2018 | 17:00:00 | 14,9 |
| 05.05.2018 | 18:00:00 | 14,9 |
| 05.05.2018 | 19:00:00 | 14,8 |
| 05.05.2018 | 20:00:00 | 14,7 |
| 05.05.2018 | 21:00:00 | 14,7 |
| 05.05.2018 | 22:00:00 | 14,6 |
| 05.05.2018 | 23:00:00 | 14,5 |
| 06.05.2018 | 00:00:00 | 14,4 |
| 06.05.2018 | 01:00:00 | 14,4 |
| 06.05.2018 | 02:00:00 | 14,4 |
| 06.05.2018 | 03:00:00 | 14,3 |
| 06.05.2018 | 04:00:00 | 14,3 |
| 06.05.2018 | 05:00:00 | 14,3 |
| 06.05.2018 | 06:00:00 | 14,3 |
| 06.05.2018 | 07:00:00 | 14,3 |
| 06.05.2018 | 08:00:00 | 14,4 |
| 06.05.2018 | 09:00:00 | 14,4 |
| 06.05.2018 | 10:00:00 | 14,6 |
| 06.05.2018 | 11:00:00 | 14,7 |
| 06.05.2018 | 12:00:00 | 14,8 |
| 06.05.2018 | 13:00:00 | 14,9 |
| 06.05.2018 | 14:00:00 | 14,9 |
| 06.05.2018 | 15:00:00 | 14,8 |
| 06.05.2018 | 16:00:00 | 14,8 |
| 06.05.2018 | 17:00:00 | 14,8 |
| 06.05.2018 | 18:00:00 | 14,8 |
| 06.05.2018 | 19:00:00 | 14,7 |
| 06.05.2018 | 20:00:00 | 14,6 |
| 06.05.2018 | 21:00:00 | 14,6 |
| 06.05.2018 | 22:00:00 | 14,5 |
| 06.05.2018 | 23:00:00 | 14,5 |
| 07.05.2018 | 00:00:00 | 14,5 |
| 07.05.2018 | 01:00:00 | 14,4 |
| 07.05.2018 | 02:00:00 | 14,4 |
| 07.05.2018 | 03:00:00 | 14,3 |
| 07.05.2018 | 04:00:00 | 14,3 |
| 07.05.2018 | 05:00:00 | 14,3 |
| 07.05.2018 | 06:00:00 | 14,3 |
| 07.05.2018 | 07:00:00 | 14,3 |
| 07.05.2018 | 08:00:00 | 14,4 |
| 07.05.2018 | 09:00:00 | 14,5 |
| 07.05.2018 | 10:00:00 | 14,6 |
| 07.05.2018 | 11:00:00 | 14,7 |
| 07.05.2018 | 12:00:00 | 15   |

|            |          |      |
|------------|----------|------|
| 07.05.2018 | 13:00:00 | 15   |
| 07.05.2018 | 14:00:00 | 15   |
| 07.05.2018 | 15:00:00 | 15   |
| 07.05.2018 | 16:00:00 | 15,1 |
| 07.05.2018 | 17:00:00 | 15,1 |
| 07.05.2018 | 18:00:00 | 15,1 |
| 07.05.2018 | 19:00:00 | 15   |
| 07.05.2018 | 20:00:00 | 15   |
| 07.05.2018 | 21:00:00 | 14,9 |
| 07.05.2018 | 22:00:00 | 14,9 |
| 07.05.2018 | 23:00:00 | 14,8 |
| 08.05.2018 | 00:00:00 | 14,8 |
| 08.05.2018 | 01:00:00 | 14,7 |
| 08.05.2018 | 02:00:00 | 14,6 |
| 08.05.2018 | 03:00:00 | 14,6 |
| 08.05.2018 | 04:00:00 | 14,5 |
| 08.05.2018 | 05:00:00 | 14,5 |
| 08.05.2018 | 06:00:00 | 14,4 |
| 08.05.2018 | 07:00:00 | 14,4 |
| 08.05.2018 | 08:00:00 | 14,6 |
| 08.05.2018 | 09:00:00 | 14,5 |
| 08.05.2018 | 10:00:00 | 14,6 |
| 08.05.2018 | 11:00:00 | 14,7 |
| 08.05.2018 | 12:00:00 | 15   |
| 08.05.2018 | 13:00:00 | 14,9 |
| 08.05.2018 | 14:00:00 | 15   |
| 08.05.2018 | 15:00:00 | 15,1 |
| 08.05.2018 | 16:00:00 | 15,2 |
| 08.05.2018 | 17:00:00 | 15,2 |
| 08.05.2018 | 18:00:00 | 15,1 |
| 08.05.2018 | 19:00:00 | 15,1 |
| 08.05.2018 | 20:00:00 | 15   |
| 08.05.2018 | 21:00:00 | 15   |
| 08.05.2018 | 22:00:00 | 14,9 |
| 08.05.2018 | 23:00:00 | 14,9 |
| 09.05.2018 | 00:00:00 | 14,8 |
| 09.05.2018 | 01:00:00 | 14,8 |
| 09.05.2018 | 02:00:00 | 14,7 |
| 09.05.2018 | 03:00:00 | 14,6 |
| 09.05.2018 | 04:00:00 | 14,6 |
| 09.05.2018 | 05:00:00 | 14,5 |
| 09.05.2018 | 06:00:00 | 14,5 |
| 09.05.2018 | 07:00:00 | 14,5 |
| 09.05.2018 | 08:00:00 | 14,5 |
| 09.05.2018 | 09:00:00 | 14,6 |
| 09.05.2018 | 10:00:00 | 14,7 |

|            |          |      |
|------------|----------|------|
| 09.05.2018 | 11:00:00 | 14,9 |
| 09.05.2018 | 12:00:00 | 15,1 |
| 09.05.2018 | 13:00:00 | 15,1 |
| 09.05.2018 | 14:00:00 | 15,2 |
| 09.05.2018 | 15:00:00 | 15,3 |
| 09.05.2018 | 16:00:00 | 15,2 |
| 09.05.2018 | 17:00:00 | 15,1 |
| 09.05.2018 | 18:00:00 | 15,1 |
| 09.05.2018 | 19:00:00 | 15   |
| 09.05.2018 | 20:00:00 | 15   |
| 09.05.2018 | 21:00:00 | 14,9 |
| 09.05.2018 | 22:00:00 | 14,8 |
| 09.05.2018 | 23:00:00 | 14,8 |
| 10.05.2018 | 00:00:00 | 14,8 |
| 10.05.2018 | 01:00:00 | 14,7 |
| 10.05.2018 | 02:00:00 | 14,7 |
| 10.05.2018 | 03:00:00 | 14,7 |
| 10.05.2018 | 04:00:00 | 14,6 |
| 10.05.2018 | 05:00:00 | 14,6 |
| 10.05.2018 | 06:00:00 | 14,6 |
| 10.05.2018 | 07:00:00 | 14,6 |
| 10.05.2018 | 08:00:00 | 14,6 |
| 10.05.2018 | 09:00:00 | 14,7 |
| 10.05.2018 | 10:00:00 | 14,9 |
| 10.05.2018 | 11:00:00 | 15,1 |
| 10.05.2018 | 12:00:00 | 15,2 |
| 10.05.2018 | 13:00:00 | 15,3 |
| 10.05.2018 | 14:00:00 | 15,3 |
| 10.05.2018 | 15:00:00 | 15,4 |
| 10.05.2018 | 16:00:00 | 15,4 |
| 10.05.2018 | 17:00:00 | 15,4 |
| 10.05.2018 | 18:00:00 | 15,3 |
| 10.05.2018 | 19:00:00 | 15,3 |
| 10.05.2018 | 20:00:00 | 15,2 |
| 10.05.2018 | 21:00:00 | 15,1 |
| 10.05.2018 | 22:00:00 | 15,1 |
| 10.05.2018 | 23:00:00 | 15   |
| 11.05.2018 | 00:00:00 | 15   |
| 11.05.2018 | 01:00:00 | 15   |
| 11.05.2018 | 02:00:00 | 15   |
| 11.05.2018 | 03:00:00 | 14,9 |
| 11.05.2018 | 04:00:00 | 14,9 |
| 11.05.2018 | 05:00:00 | 14,9 |
| 11.05.2018 | 06:00:00 | 14,9 |
| 11.05.2018 | 07:00:00 | 14,9 |
| 11.05.2018 | 08:00:00 | 15   |

|            |          |      |
|------------|----------|------|
| 11.05.2018 | 09:00:00 | 15,2 |
| 11.05.2018 | 10:00:00 | 15,3 |
| 11.05.2018 | 11:00:00 | 15,5 |
| 11.05.2018 | 12:00:00 | 15,5 |
| 11.05.2018 | 13:00:00 | 15,6 |
| 11.05.2018 | 14:00:00 | 15,7 |
| 11.05.2018 | 15:00:00 | 15,8 |
| 11.05.2018 | 16:00:00 | 15,8 |
| 11.05.2018 | 17:00:00 | 15,9 |
| 11.05.2018 | 18:00:00 | 15,9 |
| 11.05.2018 | 19:00:00 | 15,8 |
| 11.05.2018 | 20:00:00 | 15,7 |
| 11.05.2018 | 21:00:00 | 15,7 |
| 11.05.2018 | 22:00:00 | 15,6 |
| 11.05.2018 | 23:00:00 | 15,5 |
| 12.05.2018 | 00:00:00 | 15,4 |
| 12.05.2018 | 01:00:00 | 15,4 |
| 12.05.2018 | 02:00:00 | 15,4 |
| 12.05.2018 | 03:00:00 | 15,3 |
| 12.05.2018 | 04:00:00 | 15,3 |
| 12.05.2018 | 05:00:00 | 15,3 |
| 12.05.2018 | 06:00:00 | 15,3 |
| 12.05.2018 | 07:00:00 | 15,3 |
| 12.05.2018 | 08:00:00 | 15,4 |
| 12.05.2018 | 09:00:00 | 15,5 |
| 12.05.2018 | 10:00:00 | 15,8 |
| 12.05.2018 | 11:00:00 | 15,8 |
| 12.05.2018 | 12:00:00 | 16   |
| 12.05.2018 | 13:00:00 | 16,2 |
| 12.05.2018 | 14:00:00 | 16,1 |
| 12.05.2018 | 15:00:00 | 16,2 |
| 12.05.2018 | 16:00:00 | 16,2 |
| 12.05.2018 | 17:00:00 | 16,2 |
| 12.05.2018 | 18:00:00 | 16,2 |
| 12.05.2018 | 19:00:00 | 16,2 |
| 12.05.2018 | 20:00:00 | 16,1 |
| 12.05.2018 | 21:00:00 | 16,1 |
| 12.05.2018 | 22:00:00 | 16,1 |
| 12.05.2018 | 23:00:00 | 16   |
| 13.05.2018 | 00:00:00 | 16   |
| 13.05.2018 | 01:00:00 | 16   |
| 13.05.2018 | 02:00:00 | 15,9 |
| 13.05.2018 | 03:00:00 | 15,8 |
| 13.05.2018 | 04:00:00 | 15,8 |
| 13.05.2018 | 05:00:00 | 15,7 |
| 13.05.2018 | 06:00:00 | 15,6 |

|            |          |      |
|------------|----------|------|
| 13.05.2018 | 07:00:00 | 15,7 |
| 13.05.2018 | 08:00:00 | 15,8 |
| 13.05.2018 | 09:00:00 | 15,9 |
| 13.05.2018 | 10:00:00 | 16   |
| 13.05.2018 | 11:00:00 | 16,2 |
| 13.05.2018 | 12:00:00 | 16,3 |
| 13.05.2018 | 13:00:00 | 16,5 |
| 13.05.2018 | 14:00:00 | 16,5 |
| 13.05.2018 | 15:00:00 | 16,6 |
| 13.05.2018 | 16:00:00 | 16,6 |
| 13.05.2018 | 17:00:00 | 16,7 |
| 13.05.2018 | 18:00:00 | 16,6 |
| 13.05.2018 | 19:00:00 | 16,6 |
| 13.05.2018 | 20:00:00 | 16,5 |
| 13.05.2018 | 21:00:00 | 16,4 |
| 13.05.2018 | 22:00:00 | 16,4 |
| 13.05.2018 | 23:00:00 | 16,4 |
| 14.05.2018 | 00:00:00 | 16,3 |
| 14.05.2018 | 01:00:00 | 16,3 |
| 14.05.2018 | 02:00:00 | 16,3 |
| 14.05.2018 | 03:00:00 | 16,2 |
| 14.05.2018 | 04:00:00 | 16,2 |
| 14.05.2018 | 05:00:00 | 16,1 |
| 14.05.2018 | 06:00:00 | 16,2 |
| 14.05.2018 | 07:00:00 | 16,2 |
| 14.05.2018 | 08:00:00 | 16,2 |
| 14.05.2018 | 09:00:00 | 16,3 |
| 14.05.2018 | 10:00:00 | 16,4 |
| 14.05.2018 | 11:00:00 | 16,5 |
| 14.05.2018 | 12:00:00 | 16,6 |
| 14.05.2018 | 13:00:00 | 16,7 |
| 14.05.2018 | 14:00:00 | 16,8 |
| 14.05.2018 | 15:00:00 | 16,9 |
| 14.05.2018 | 16:00:00 | 16,9 |
| 14.05.2018 | 17:00:00 | 16,9 |
| 14.05.2018 | 18:00:00 | 16,9 |
| 14.05.2018 | 19:00:00 | 16,8 |
| 14.05.2018 | 20:00:00 | 16,8 |
| 14.05.2018 | 21:00:00 | 16,7 |
| 14.05.2018 | 22:00:00 | 16,7 |
| 14.05.2018 | 23:00:00 | 16,7 |
| 15.05.2018 | 00:00:00 | 16,6 |
| 15.05.2018 | 01:00:00 | 16,6 |
| 15.05.2018 | 02:00:00 | 16,6 |
| 15.05.2018 | 03:00:00 | 16,5 |
| 15.05.2018 | 04:00:00 | 16,5 |

|            |          |      |
|------------|----------|------|
| 15.05.2018 | 05:00:00 | 16,4 |
| 15.05.2018 | 06:00:00 | 16,4 |
| 15.05.2018 | 07:00:00 | 16,3 |
| 15.05.2018 | 08:00:00 | 16,3 |
| 15.05.2018 | 09:00:00 | 16,3 |
| 15.05.2018 | 10:00:00 | 16,3 |
| 15.05.2018 | 11:00:00 | 16,2 |
| 15.05.2018 | 12:00:00 | 16,2 |
| 15.05.2018 | 13:00:00 | 16,2 |
| 15.05.2018 | 14:00:00 | 16,2 |
| 15.05.2018 | 15:00:00 | 16,2 |
| 15.05.2018 | 16:00:00 | 16,3 |
| 15.05.2018 | 17:00:00 | 16,3 |
| 15.05.2018 | 18:00:00 | 16,3 |
| 15.05.2018 | 19:00:00 | 16,2 |
| 15.05.2018 | 20:00:00 | 16,2 |
| 15.05.2018 | 21:00:00 | 16,2 |
| 15.05.2018 | 22:00:00 | 16,1 |
| 15.05.2018 | 23:00:00 | 16   |
| 16.05.2018 | 00:00:00 | 15,9 |
| 16.05.2018 | 01:00:00 | 15,9 |
| 16.05.2018 | 02:00:00 | 15,8 |
| 16.05.2018 | 03:00:00 | 15,7 |
| 16.05.2018 | 04:00:00 | 15,6 |
| 16.05.2018 | 05:00:00 | 15,5 |
| 16.05.2018 | 06:00:00 | 15,5 |
| 16.05.2018 | 07:00:00 | 15,5 |
| 16.05.2018 | 08:00:00 | 15,5 |
| 16.05.2018 | 09:00:00 | 15,6 |
| 16.05.2018 | 10:00:00 | 15,7 |
| 16.05.2018 | 11:00:00 | 15,8 |
| 16.05.2018 | 12:00:00 | 16   |
| 16.05.2018 | 13:00:00 | 16   |
| 16.05.2018 | 14:00:00 | 16   |
| 16.05.2018 | 15:00:00 | 15,8 |
| 16.05.2018 | 16:00:00 | 15,8 |
| 16.05.2018 | 17:00:00 | 15,7 |
| 16.05.2018 | 18:00:00 | 15,7 |
| 16.05.2018 | 19:00:00 | 15,6 |
| 16.05.2018 | 20:00:00 | 15,5 |
| 16.05.2018 | 21:00:00 | 15,4 |
| 16.05.2018 | 22:00:00 | 15,3 |
| 16.05.2018 | 23:00:00 | 15,2 |
| 17.05.2018 | 00:00:00 | 15,2 |
| 17.05.2018 | 01:00:00 | 15,1 |
| 17.05.2018 | 02:00:00 | 15,1 |

|            |          |      |
|------------|----------|------|
| 17.05.2018 | 03:00:00 | 15   |
| 17.05.2018 | 04:00:00 | 15   |
| 17.05.2018 | 05:00:00 | 15   |
| 17.05.2018 | 06:00:00 | 15   |
| 17.05.2018 | 07:00:00 | 15,1 |
| 17.05.2018 | 08:00:00 | 15,2 |
| 17.05.2018 | 09:00:00 | 15,2 |
| 17.05.2018 | 10:00:00 | 15,2 |
| 17.05.2018 | 11:00:00 | 15,3 |
| 17.05.2018 | 12:00:00 | 15,4 |
| 17.05.2018 | 13:00:00 | 15,4 |
| 17.05.2018 | 14:00:00 | 15,5 |
| 17.05.2018 | 15:00:00 | 15,5 |
| 17.05.2018 | 16:00:00 | 15,6 |
| 17.05.2018 | 17:00:00 | 15,6 |
| 17.05.2018 | 18:00:00 | 15,5 |
| 17.05.2018 | 19:00:00 | 15,5 |
| 17.05.2018 | 20:00:00 | 15,4 |
| 17.05.2018 | 21:00:00 | 15,3 |
| 17.05.2018 | 22:00:00 | 15,3 |
| 17.05.2018 | 23:00:00 | 15,3 |
| 18.05.2018 | 00:00:00 | 15,2 |
| 18.05.2018 | 01:00:00 | 15,2 |
| 18.05.2018 | 02:00:00 | 15,2 |
| 18.05.2018 | 03:00:00 | 15,1 |
| 18.05.2018 | 04:00:00 | 15,1 |
| 18.05.2018 | 05:00:00 | 15,1 |
| 18.05.2018 | 06:00:00 | 15,1 |
| 18.05.2018 | 07:00:00 | 15,1 |
| 18.05.2018 | 08:00:00 | 15,2 |
| 18.05.2018 | 09:00:00 | 15,3 |
| 18.05.2018 | 10:00:00 | 15,5 |
| 18.05.2018 | 11:00:00 | 15,6 |
| 18.05.2018 | 12:00:00 | 15,8 |
| 18.05.2018 | 13:00:00 | 15,8 |
| 18.05.2018 | 14:00:00 | 15,8 |
| 18.05.2018 | 15:00:00 | 15,8 |
| 18.05.2018 | 16:00:00 | 15,7 |
| 18.05.2018 | 17:00:00 | 15,7 |
| 18.05.2018 | 18:00:00 | 15,6 |
| 18.05.2018 | 19:00:00 | 15,5 |
| 18.05.2018 | 20:00:00 | 15,4 |
| 18.05.2018 | 21:00:00 | 15,3 |
| 18.05.2018 | 22:00:00 | 15,2 |
| 18.05.2018 | 23:00:00 | 15,2 |
| 19.05.2018 | 00:00:00 | 15,2 |



|            |          |      |
|------------|----------|------|
| 19.05.2018 | 01:00:00 | 15,2 |
| 19.05.2018 | 02:00:00 | 15,1 |
| 19.05.2018 | 03:00:00 | 15,1 |
| 19.05.2018 | 04:00:00 | 15   |
| 19.05.2018 | 05:00:00 | 15   |
| 19.05.2018 | 06:00:00 | 14,9 |
| 19.05.2018 | 07:00:00 | 15   |
| 19.05.2018 | 08:00:00 | 15   |
| 19.05.2018 | 09:00:00 | 15,2 |
| 19.05.2018 | 10:00:00 | 15,3 |
| 19.05.2018 | 11:00:00 | 15,3 |
| 19.05.2018 | 12:00:00 | 15,3 |
| 19.05.2018 | 13:00:00 | 15,3 |
| 19.05.2018 | 14:00:00 | 15,3 |
| 19.05.2018 | 15:00:00 | 15,4 |
| 19.05.2018 | 16:00:00 | 15,4 |
| 19.05.2018 | 17:00:00 | 15,3 |
| 19.05.2018 | 18:00:00 | 15,3 |
| 19.05.2018 | 19:00:00 | 15,2 |
| 19.05.2018 | 20:00:00 | 15,1 |
| 19.05.2018 | 21:00:00 | 15   |
| 19.05.2018 | 22:00:00 | 14,9 |
| 19.05.2018 | 23:00:00 | 14,8 |
| 20.05.2018 | 00:00:00 | 14,8 |
| 20.05.2018 | 01:00:00 | 14,7 |
| 20.05.2018 | 02:00:00 | 14,7 |
| 20.05.2018 | 03:00:00 | 14,7 |
| 20.05.2018 | 04:00:00 | 14,6 |
| 20.05.2018 | 05:00:00 | 14,6 |
| 20.05.2018 | 06:00:00 | 14,6 |
| 20.05.2018 | 07:00:00 | 14,6 |
| 20.05.2018 | 08:00:00 | 14,8 |
| 20.05.2018 | 09:00:00 | 14,9 |
| 20.05.2018 | 10:00:00 | 15,1 |
| 20.05.2018 | 11:00:00 | 15,3 |
| 20.05.2018 | 12:00:00 | 15,4 |
| 20.05.2018 | 13:00:00 | 15,5 |
| 20.05.2018 | 14:00:00 | 15,5 |
| 20.05.2018 | 15:00:00 | 15,6 |
| 20.05.2018 | 16:00:00 | 15,6 |
| 20.05.2018 | 17:00:00 | 15,6 |
| 20.05.2018 | 18:00:00 | 15,5 |
| 20.05.2018 | 19:00:00 | 15,4 |
| 20.05.2018 | 20:00:00 | 15,4 |
| 20.05.2018 | 21:00:00 | 15,3 |
| 20.05.2018 | 22:00:00 | 15,2 |

|            |          |      |
|------------|----------|------|
| 20.05.2018 | 23:00:00 | 15,1 |
| 21.05.2018 | 00:00:00 | 15,1 |
| 21.05.2018 | 01:00:00 | 15   |
| 21.05.2018 | 02:00:00 | 15   |
| 21.05.2018 | 03:00:00 | 14,9 |
| 21.05.2018 | 04:00:00 | 14,9 |
| 21.05.2018 | 05:00:00 | 14,8 |
| 21.05.2018 | 06:00:00 | 14,8 |
| 21.05.2018 | 07:00:00 | 14,8 |
| 21.05.2018 | 08:00:00 | 14,8 |
| 21.05.2018 | 09:00:00 | 15   |
| 21.05.2018 | 10:00:00 | 15,1 |
| 21.05.2018 | 11:00:00 | 15,3 |
| 21.05.2018 | 12:00:00 | 15,4 |
| 21.05.2018 | 13:00:00 | 15,5 |
| 21.05.2018 | 14:00:00 | 15,5 |
| 21.05.2018 | 15:00:00 | 15,5 |
| 21.05.2018 | 16:00:00 | 15,5 |
| 21.05.2018 | 17:00:00 | 15,4 |
| 21.05.2018 | 18:00:00 | 15,4 |
| 21.05.2018 | 19:00:00 | 15,4 |
| 21.05.2018 | 20:00:00 | 15,3 |
| 21.05.2018 | 21:00:00 | 15,3 |
| 21.05.2018 | 22:00:00 | 15,3 |
| 21.05.2018 | 23:00:00 | 15,2 |
| 22.05.2018 | 00:00:00 | 15,2 |
| 22.05.2018 | 01:00:00 | 15,2 |
| 22.05.2018 | 02:00:00 | 15,2 |
| 22.05.2018 | 03:00:00 | 15,1 |
| 22.05.2018 | 04:00:00 | 15   |
| 22.05.2018 | 05:00:00 | 15   |
| 22.05.2018 | 06:00:00 | 15   |
| 22.05.2018 | 07:00:00 | 15   |
| 22.05.2018 | 08:00:00 | 15,1 |
| 22.05.2018 | 09:00:00 | 15,1 |
| 22.05.2018 | 10:00:00 | 15,3 |
| 22.05.2018 | 11:00:00 | 15,5 |
| 22.05.2018 | 12:00:00 | 15,6 |
| 22.05.2018 | 13:00:00 | 15,7 |
| 22.05.2018 | 14:00:00 | 15,7 |
| 22.05.2018 | 15:00:00 | 15,7 |
| 22.05.2018 | 16:00:00 | 15,7 |
| 22.05.2018 | 17:00:00 | 15,6 |
| 22.05.2018 | 18:00:00 | 15,6 |
| 22.05.2018 | 19:00:00 | 15,5 |
| 22.05.2018 | 20:00:00 | 15,5 |

|            |          |      |
|------------|----------|------|
| 22.05.2018 | 21:00:00 | 15,4 |
| 22.05.2018 | 22:00:00 | 15,4 |
| 22.05.2018 | 23:00:00 | 15,4 |
| 23.05.2018 | 00:00:00 | 15,5 |
| 23.05.2018 | 01:00:00 | 15,5 |
| 23.05.2018 | 02:00:00 | 15,5 |
| 23.05.2018 | 03:00:00 | 15,5 |
| 23.05.2018 | 04:00:00 | 15,5 |
| 23.05.2018 | 05:00:00 | 15,5 |
| 23.05.2018 | 06:00:00 | 15,5 |
| 23.05.2018 | 07:00:00 | 15,5 |
| 23.05.2018 | 08:00:00 | 15,6 |
| 23.05.2018 | 09:00:00 | 15,7 |
| 23.05.2018 | 10:00:00 | 15,9 |
| 23.05.2018 | 11:00:00 | 16   |
| 23.05.2018 | 12:00:00 | 16,1 |
| 23.05.2018 | 13:00:00 | 16,1 |
| 23.05.2018 | 14:00:00 | 16,1 |
| 23.05.2018 | 15:00:00 | 16,1 |
| 23.05.2018 | 16:00:00 | 16   |
| 23.05.2018 | 17:00:00 | 15,9 |
| 23.05.2018 | 18:00:00 | 15,9 |
| 23.05.2018 | 19:00:00 | 15,9 |
| 23.05.2018 | 20:00:00 | 15,9 |
| 23.05.2018 | 21:00:00 | 16   |
| 23.05.2018 | 22:00:00 | 16   |
| 23.05.2018 | 23:00:00 | 16,1 |
| 24.05.2018 | 00:00:00 | 16,1 |
| 24.05.2018 | 01:00:00 | 16,1 |
| 24.05.2018 | 02:00:00 | 16,1 |
| 24.05.2018 | 03:00:00 | 16   |
| 24.05.2018 | 04:00:00 | 16   |
| 24.05.2018 | 05:00:00 | 15,9 |
| 24.05.2018 | 06:00:00 | 15,9 |
| 24.05.2018 | 07:00:00 | 15,9 |
| 24.05.2018 | 08:00:00 | 16   |
| 24.05.2018 | 09:00:00 | 16,1 |
| 24.05.2018 | 10:00:00 | 16,2 |
| 24.05.2018 | 11:00:00 | 16,4 |
| 24.05.2018 | 12:00:00 | 16,3 |
| 24.05.2018 | 13:00:00 | 16,4 |
| 24.05.2018 | 14:00:00 | 16,3 |
| 24.05.2018 | 15:00:00 | 16,3 |
| 24.05.2018 | 16:00:00 | 16,2 |
| 24.05.2018 | 17:00:00 | 16,4 |
| 24.05.2018 | 18:00:00 | 16,4 |

|            |          |      |
|------------|----------|------|
| 24.05.2018 | 19:00:00 | 16,5 |
| 24.05.2018 | 20:00:00 | 16,6 |
| 24.05.2018 | 21:00:00 | 16,7 |
| 24.05.2018 | 22:00:00 | 16,6 |
| 24.05.2018 | 23:00:00 | 16,6 |
| 25.05.2018 | 00:00:00 | 16,6 |
| 25.05.2018 | 01:00:00 | 16,6 |
| 25.05.2018 | 02:00:00 | 16,6 |
| 25.05.2018 | 03:00:00 | 16,6 |
| 25.05.2018 | 04:00:00 | 16,6 |
| 25.05.2018 | 05:00:00 | 16,6 |
| 25.05.2018 | 06:00:00 | 16,5 |
| 25.05.2018 | 07:00:00 | 16,4 |
| 25.05.2018 | 08:00:00 | 16,4 |
| 25.05.2018 | 09:00:00 | 16,3 |
| 25.05.2018 | 10:00:00 | 16,4 |
| 25.05.2018 | 11:00:00 | 16,3 |
| 25.05.2018 | 12:00:00 | 16,4 |
| 25.05.2018 | 13:00:00 | 16,5 |
| 25.05.2018 | 14:00:00 | 16,6 |
| 25.05.2018 | 15:00:00 | 16,6 |
| 25.05.2018 | 16:00:00 | 16,6 |
| 25.05.2018 | 17:00:00 | 16,6 |
| 25.05.2018 | 18:00:00 | 16,6 |
| 25.05.2018 | 19:00:00 | 16,6 |
| 25.05.2018 | 20:00:00 | 16,6 |
| 25.05.2018 | 21:00:00 | 16,6 |
| 25.05.2018 | 22:00:00 | 16,5 |
| 25.05.2018 | 23:00:00 | 16,5 |
| 26.05.2018 | 00:00:00 | 16,5 |
| 26.05.2018 | 01:00:00 | 16,5 |
| 26.05.2018 | 02:00:00 | 16,4 |
| 26.05.2018 | 03:00:00 | 16,4 |
| 26.05.2018 | 04:00:00 | 16,4 |
| 26.05.2018 | 05:00:00 | 16,4 |
| 26.05.2018 | 06:00:00 | 16,4 |
| 26.05.2018 | 07:00:00 | 16,5 |
| 26.05.2018 | 08:00:00 | 16,7 |
| 26.05.2018 | 09:00:00 | 16,7 |
| 26.05.2018 | 10:00:00 | 16,9 |
| 26.05.2018 | 11:00:00 | 17   |
| 26.05.2018 | 12:00:00 | 17,1 |
| 26.05.2018 | 13:00:00 | 17,3 |
| 26.05.2018 | 14:00:00 | 17,3 |
| 26.05.2018 | 15:00:00 | 17,4 |
| 26.05.2018 | 16:00:00 | 17,4 |

|            |          |      |
|------------|----------|------|
| 26.05.2018 | 17:00:00 | 17,4 |
| 26.05.2018 | 18:00:00 | 17,4 |
| 26.05.2018 | 19:00:00 | 17,4 |
| 26.05.2018 | 20:00:00 | 17,3 |
| 26.05.2018 | 21:00:00 | 17,2 |
| 26.05.2018 | 22:00:00 | 17,1 |
| 26.05.2018 | 23:00:00 | 17,1 |
| 27.05.2018 | 00:00:00 | 17   |
| 27.05.2018 | 01:00:00 | 17   |
| 27.05.2018 | 02:00:00 | 16,9 |
| 27.05.2018 | 03:00:00 | 16,9 |
| 27.05.2018 | 04:00:00 | 16,8 |
| 27.05.2018 | 05:00:00 | 16,8 |
| 27.05.2018 | 06:00:00 | 16,8 |
| 27.05.2018 | 07:00:00 | 16,8 |
| 27.05.2018 | 08:00:00 | 16,9 |
| 27.05.2018 | 09:00:00 | 17,1 |
| 27.05.2018 | 10:00:00 | 17,3 |
| 27.05.2018 | 11:00:00 | 17,4 |
| 27.05.2018 | 12:00:00 | 17,6 |
| 27.05.2018 | 13:00:00 | 17,7 |
| 27.05.2018 | 14:00:00 | 17,8 |
| 27.05.2018 | 15:00:00 | 17,8 |
| 27.05.2018 | 16:00:00 | 17,8 |
| 27.05.2018 | 17:00:00 | 17,8 |
| 27.05.2018 | 18:00:00 | 17,8 |
| 27.05.2018 | 19:00:00 | 17,7 |
| 27.05.2018 | 20:00:00 | 17,7 |
| 27.05.2018 | 21:00:00 | 17,6 |
| 27.05.2018 | 22:00:00 | 17,6 |
| 27.05.2018 | 23:00:00 | 17,6 |
| 28.05.2018 | 00:00:00 | 17,5 |
| 28.05.2018 | 01:00:00 | 17,5 |
| 28.05.2018 | 02:00:00 | 17,4 |
| 28.05.2018 | 03:00:00 | 17,4 |
| 28.05.2018 | 04:00:00 | 17,3 |
| 28.05.2018 | 05:00:00 | 17,3 |
| 28.05.2018 | 06:00:00 | 17,3 |
| 28.05.2018 | 07:00:00 | 17,3 |
| 28.05.2018 | 08:00:00 | 17,4 |
| 28.05.2018 | 09:00:00 | 17,5 |
| 28.05.2018 | 10:00:00 | 17,6 |
| 28.05.2018 | 11:00:00 | 17,8 |
| 28.05.2018 | 12:00:00 | 17,9 |
| 28.05.2018 | 13:00:00 | 17,9 |
| 28.05.2018 | 14:00:00 | 18   |

|            |          |      |
|------------|----------|------|
| 28.05.2018 | 15:00:00 | 18,1 |
| 28.05.2018 | 16:00:00 | 18,2 |
| 28.05.2018 | 17:00:00 | 18,2 |
| 28.05.2018 | 18:00:00 | 18,2 |
| 28.05.2018 | 19:00:00 | 18,1 |
| 28.05.2018 | 20:00:00 | 18,1 |
| 28.05.2018 | 21:00:00 | 18,1 |
| 28.05.2018 | 22:00:00 | 18   |
| 28.05.2018 | 23:00:00 | 18   |
| 29.05.2018 | 00:00:00 | 18   |
| 29.05.2018 | 01:00:00 | 18   |
| 29.05.2018 | 02:00:00 | 18   |
| 29.05.2018 | 03:00:00 | 18   |
| 29.05.2018 | 04:00:00 | 18   |
| 29.05.2018 | 05:00:00 | 17,9 |
| 29.05.2018 | 06:00:00 | 17,9 |
| 29.05.2018 | 07:00:00 | 17,9 |
| 29.05.2018 | 08:00:00 | 18   |
| 29.05.2018 | 09:00:00 | 18,1 |
| 29.05.2018 | 10:00:00 | 18,2 |
| 29.05.2018 | 11:00:00 | 18,3 |
| 29.05.2018 | 12:00:00 | 18,4 |
| 29.05.2018 | 13:00:00 | 18,5 |
| 29.05.2018 | 14:00:00 | 18,5 |
| 29.05.2018 | 15:00:00 | 18,5 |
| 29.05.2018 | 16:00:00 | 18,4 |
| 29.05.2018 | 17:00:00 | 18,4 |
| 29.05.2018 | 18:00:00 | 18,4 |
| 29.05.2018 | 19:00:00 | 18,4 |
| 29.05.2018 | 20:00:00 | 18,4 |
| 29.05.2018 | 21:00:00 | 18,3 |
| 29.05.2018 | 22:00:00 | 18,3 |
| 29.05.2018 | 23:00:00 | 18,3 |
| 30.05.2018 | 00:00:00 | 18,3 |
| 30.05.2018 | 01:00:00 | 18,3 |
| 30.05.2018 | 02:00:00 | 18,2 |
| 30.05.2018 | 03:00:00 | 18,2 |
| 30.05.2018 | 04:00:00 | 18,2 |
| 30.05.2018 | 05:00:00 | 18,1 |
| 30.05.2018 | 06:00:00 | 18   |
| 30.05.2018 | 07:00:00 | 18   |
| 30.05.2018 | 08:00:00 | 18   |
| 30.05.2018 | 09:00:00 | 18   |
| 30.05.2018 | 10:00:00 | 18,1 |
| 30.05.2018 | 11:00:00 | 18,1 |
| 30.05.2018 | 12:00:00 | 18,3 |

|            |          |      |
|------------|----------|------|
| 30.05.2018 | 13:00:00 | 18,5 |
| 30.05.2018 | 14:00:00 | 18,5 |
| 30.05.2018 | 15:00:00 | 18,7 |
| 30.05.2018 | 16:00:00 | 18,7 |
| 30.05.2018 | 17:00:00 | 18,7 |
| 30.05.2018 | 18:00:00 | 18,7 |
| 30.05.2018 | 19:00:00 | 18,6 |
| 30.05.2018 | 20:00:00 | 18,6 |
| 30.05.2018 | 21:00:00 | 18,5 |
| 30.05.2018 | 22:00:00 | 18,5 |
| 30.05.2018 | 23:00:00 | 18,4 |
| 31.05.2018 | 00:00:00 | 18,4 |
| 31.05.2018 | 01:00:00 | 18,3 |
| 31.05.2018 | 02:00:00 | 18,3 |
| 31.05.2018 | 03:00:00 | 18,2 |
| 31.05.2018 | 04:00:00 | 18,2 |
| 31.05.2018 | 05:00:00 | 18,1 |
| 31.05.2018 | 06:00:00 | 18,1 |
| 31.05.2018 | 07:00:00 | 18,1 |
| 31.05.2018 | 08:00:00 | 18,2 |
| 31.05.2018 | 09:00:00 | 18,3 |
| 31.05.2018 | 10:00:00 | 18,5 |
| 31.05.2018 | 11:00:00 | 18,6 |
| 31.05.2018 | 12:00:00 | 18,7 |
| 31.05.2018 | 13:00:00 | 18,9 |
| 31.05.2018 | 14:00:00 | 19   |
| 31.05.2018 | 15:00:00 | 19   |
| 31.05.2018 | 16:00:00 | 19,1 |
| 31.05.2018 | 17:00:00 | 19   |
| 31.05.2018 | 18:00:00 | 18,9 |
| 31.05.2018 | 19:00:00 | 18,8 |
| 31.05.2018 | 20:00:00 | 18,8 |
| 31.05.2018 | 21:00:00 | 18,7 |
| 31.05.2018 | 22:00:00 | 18,7 |
| 31.05.2018 | 23:00:00 | 18,7 |
| 01.04.2019 | 00:00:00 | 9,1  |
| 01.04.2019 | 01:00:00 | 9,1  |
| 01.04.2019 | 02:00:00 | 9    |
| 01.04.2019 | 03:00:00 | 9    |
| 01.04.2019 | 04:00:00 | 8,9  |
| 01.04.2019 | 05:00:00 | 8,9  |
| 01.04.2019 | 06:00:00 | 8,8  |
| 01.04.2019 | 07:00:00 | 8,8  |
| 01.04.2019 | 08:00:00 | 8,8  |
| 01.04.2019 | 09:00:00 | 8,8  |
| 01.04.2019 | 10:00:00 | 9    |

|            |          |     |
|------------|----------|-----|
| 01.04.2019 | 11:00:00 | 9,1 |
| 01.04.2019 | 12:00:00 | 9,2 |
| 01.04.2019 | 13:00:00 | 9,2 |
| 01.04.2019 | 14:00:00 | 9,2 |
| 01.04.2019 | 15:00:00 | 9,3 |
| 01.04.2019 | 16:00:00 | 9,4 |
| 01.04.2019 | 17:00:00 | 9,4 |
| 01.04.2019 | 18:00:00 | 9,4 |
| 01.04.2019 | 19:00:00 | 9,4 |
| 01.04.2019 | 20:00:00 | 9,4 |
| 01.04.2019 | 21:00:00 | 9,3 |
| 01.04.2019 | 22:00:00 | 9,3 |
| 01.04.2019 | 23:00:00 | 9,3 |
| 02.04.2019 | 00:00:00 | 9,3 |
| 02.04.2019 | 01:00:00 | 9,3 |
| 02.04.2019 | 02:00:00 | 9,2 |
| 02.04.2019 | 03:00:00 | 9,2 |
| 02.04.2019 | 04:00:00 | 9,1 |
| 02.04.2019 | 05:00:00 | 9,1 |
| 02.04.2019 | 06:00:00 | 9   |
| 02.04.2019 | 07:00:00 | 9   |
| 02.04.2019 | 08:00:00 | 9   |
| 02.04.2019 | 09:00:00 | 9   |
| 02.04.2019 | 10:00:00 | 9,1 |
| 02.04.2019 | 11:00:00 | 9,3 |
| 02.04.2019 | 12:00:00 | 9,4 |
| 02.04.2019 | 13:00:00 | 9,4 |
| 02.04.2019 | 14:00:00 | 9,5 |
| 02.04.2019 | 15:00:00 | 9,5 |
| 02.04.2019 | 16:00:00 | 9,6 |
| 02.04.2019 | 17:00:00 | 9,6 |
| 02.04.2019 | 18:00:00 | 9,6 |
| 02.04.2019 | 19:00:00 | 9,6 |
| 02.04.2019 | 20:00:00 | 9,6 |
| 02.04.2019 | 21:00:00 | 9,5 |
| 02.04.2019 | 22:00:00 | 9,5 |
| 02.04.2019 | 23:00:00 | 9,5 |
| 03.04.2019 | 00:00:00 | 9,5 |
| 03.04.2019 | 01:00:00 | 9,5 |
| 03.04.2019 | 02:00:00 | 9,4 |
| 03.04.2019 | 03:00:00 | 9,4 |
| 03.04.2019 | 04:00:00 | 9,4 |
| 03.04.2019 | 05:00:00 | 9,3 |
| 03.04.2019 | 06:00:00 | 9,3 |
| 03.04.2019 | 07:00:00 | 9,3 |
| 03.04.2019 | 08:00:00 | 9,3 |



|            |          |      |
|------------|----------|------|
| 03.04.2019 | 09:00:00 | 9,3  |
| 03.04.2019 | 10:00:00 | 9,4  |
| 03.04.2019 | 11:00:00 | 9,5  |
| 03.04.2019 | 12:00:00 | 9,6  |
| 03.04.2019 | 13:00:00 | 9,7  |
| 03.04.2019 | 14:00:00 | 9,8  |
| 03.04.2019 | 15:00:00 | 9,8  |
| 03.04.2019 | 16:00:00 | 9,9  |
| 03.04.2019 | 17:00:00 | 9,9  |
| 03.04.2019 | 18:00:00 | 9,9  |
| 03.04.2019 | 19:00:00 | 9,9  |
| 03.04.2019 | 20:00:00 | 9,8  |
| 03.04.2019 | 21:00:00 | 9,8  |
| 03.04.2019 | 22:00:00 | 9,8  |
| 03.04.2019 | 23:00:00 | 9,7  |
| 04.04.2019 | 00:00:00 | 9,7  |
| 04.04.2019 | 01:00:00 | 9,7  |
| 04.04.2019 | 02:00:00 | 9,7  |
| 04.04.2019 | 03:00:00 | 9,7  |
| 04.04.2019 | 04:00:00 | 9,6  |
| 04.04.2019 | 05:00:00 | 9,6  |
| 04.04.2019 | 06:00:00 | 9,6  |
| 04.04.2019 | 07:00:00 | 9,6  |
| 04.04.2019 | 08:00:00 | 9,6  |
| 04.04.2019 | 09:00:00 | 9,7  |
| 04.04.2019 | 10:00:00 | 9,9  |
| 04.04.2019 | 11:00:00 | 10   |
| 04.04.2019 | 12:00:00 | 10,2 |
| 04.04.2019 | 13:00:00 | 10,3 |
| 04.04.2019 | 14:00:00 | 10,3 |
| 04.04.2019 | 15:00:00 | 10,4 |
| 04.04.2019 | 16:00:00 | 10,4 |
| 04.04.2019 | 17:00:00 | 10,4 |
| 04.04.2019 | 18:00:00 | 10,4 |
| 04.04.2019 | 19:00:00 | 10,3 |
| 04.04.2019 | 20:00:00 | 10,2 |
| 04.04.2019 | 21:00:00 | 10,2 |
| 04.04.2019 | 22:00:00 | 10,1 |
| 04.04.2019 | 23:00:00 | 10,1 |
| 05.04.2019 | 00:00:00 | 10,1 |
| 05.04.2019 | 01:00:00 | 10   |
| 05.04.2019 | 02:00:00 | 10   |
| 05.04.2019 | 03:00:00 | 10   |
| 05.04.2019 | 04:00:00 | 9,9  |
| 05.04.2019 | 05:00:00 | 9,9  |
| 05.04.2019 | 06:00:00 | 9,9  |

|            |          |      |
|------------|----------|------|
| 05.04.2019 | 07:00:00 | 9,9  |
| 05.04.2019 | 08:00:00 | 10   |
| 05.04.2019 | 09:00:00 | 10,1 |
| 05.04.2019 | 10:00:00 | 10,2 |
| 05.04.2019 | 11:00:00 | 10,4 |
| 05.04.2019 | 12:00:00 | 10,5 |
| 05.04.2019 | 13:00:00 | 10,5 |
| 05.04.2019 | 14:00:00 | 10,6 |
| 05.04.2019 | 15:00:00 | 10,6 |
| 05.04.2019 | 16:00:00 | 10,6 |
| 05.04.2019 | 17:00:00 | 10,5 |
| 05.04.2019 | 18:00:00 | 10,5 |
| 05.04.2019 | 19:00:00 | 10,4 |
| 05.04.2019 | 20:00:00 | 10,4 |
| 05.04.2019 | 21:00:00 | 10,4 |
| 05.04.2019 | 22:00:00 | 10,3 |
| 05.04.2019 | 23:00:00 | 10,3 |
| 06.04.2019 | 00:00:00 | 10,3 |
| 06.04.2019 | 01:00:00 | 10,2 |
| 06.04.2019 | 02:00:00 | 10,2 |
| 06.04.2019 | 03:00:00 | 10,2 |
| 06.04.2019 | 04:00:00 | 10,2 |
| 06.04.2019 | 05:00:00 | 10,1 |
| 06.04.2019 | 06:00:00 | 10,1 |
| 06.04.2019 | 07:00:00 | 10,2 |
| 06.04.2019 | 08:00:00 | 10,2 |
| 06.04.2019 | 09:00:00 | 10,3 |
| 06.04.2019 | 10:00:00 | 10,4 |
| 06.04.2019 | 11:00:00 | 10,5 |
| 06.04.2019 | 12:00:00 | 10,6 |
| 06.04.2019 | 13:00:00 | 10,7 |
| 06.04.2019 | 14:00:00 | 10,8 |
| 06.04.2019 | 15:00:00 | 10,7 |
| 06.04.2019 | 16:00:00 | 10,7 |
| 06.04.2019 | 17:00:00 | 10,6 |
| 06.04.2019 | 18:00:00 | 10,5 |
| 06.04.2019 | 19:00:00 | 10,5 |
| 06.04.2019 | 20:00:00 | 10,4 |
| 06.04.2019 | 21:00:00 | 10,3 |
| 06.04.2019 | 22:00:00 | 10,3 |
| 06.04.2019 | 23:00:00 | 10,3 |
| 07.04.2019 | 00:00:00 | 10,3 |
| 07.04.2019 | 01:00:00 | 10,3 |
| 07.04.2019 | 02:00:00 | 10,3 |
| 07.04.2019 | 03:00:00 | 10,3 |
| 07.04.2019 | 04:00:00 | 10,3 |

|            |          |      |
|------------|----------|------|
| 07.04.2019 | 05:00:00 | 10,2 |
| 07.04.2019 | 06:00:00 | 10,2 |
| 07.04.2019 | 07:00:00 | 10,3 |
| 07.04.2019 | 08:00:00 | 10,2 |
| 07.04.2019 | 09:00:00 | 10,3 |
| 07.04.2019 | 10:00:00 | 10,5 |
| 07.04.2019 | 11:00:00 | 10,6 |
| 07.04.2019 | 12:00:00 | 10,7 |
| 07.04.2019 | 13:00:00 | 10,7 |
| 07.04.2019 | 14:00:00 | 10,8 |
| 07.04.2019 | 15:00:00 | 10,8 |
| 07.04.2019 | 16:00:00 | 10,8 |
| 07.04.2019 | 17:00:00 | 10,8 |
| 07.04.2019 | 18:00:00 | 10,7 |
| 07.04.2019 | 19:00:00 | 10,7 |
| 07.04.2019 | 20:00:00 | 10,6 |
| 07.04.2019 | 21:00:00 | 10,5 |
| 07.04.2019 | 22:00:00 | 10,5 |
| 07.04.2019 | 23:00:00 | 10,5 |
| 08.04.2019 | 00:00:00 | 10,5 |
| 08.04.2019 | 01:00:00 | 10,4 |
| 08.04.2019 | 02:00:00 | 10,4 |
| 08.04.2019 | 03:00:00 | 10,4 |
| 08.04.2019 | 04:00:00 | 10,4 |
| 08.04.2019 | 05:00:00 | 10,3 |
| 08.04.2019 | 06:00:00 | 10,3 |
| 08.04.2019 | 07:00:00 | 10,3 |
| 08.04.2019 | 08:00:00 | 10,3 |
| 08.04.2019 | 09:00:00 | 10,4 |
| 08.04.2019 | 10:00:00 | 10,6 |
| 08.04.2019 | 11:00:00 | 10,7 |
| 08.04.2019 | 12:00:00 | 10,8 |
| 08.04.2019 | 13:00:00 | 10,9 |
| 08.04.2019 | 14:00:00 | 10,9 |
| 08.04.2019 | 15:00:00 | 11   |
| 08.04.2019 | 16:00:00 | 11   |
| 08.04.2019 | 17:00:00 | 11   |
| 08.04.2019 | 18:00:00 | 11   |
| 08.04.2019 | 19:00:00 | 11   |
| 08.04.2019 | 20:00:00 | 10,9 |
| 08.04.2019 | 21:00:00 | 10,9 |
| 08.04.2019 | 22:00:00 | 10,9 |
| 08.04.2019 | 23:00:00 | 10,9 |
| 09.04.2019 | 00:00:00 | 10,8 |
| 09.04.2019 | 01:00:00 | 10,8 |
| 09.04.2019 | 02:00:00 | 10,8 |

|            |          |      |
|------------|----------|------|
| 09.04.2019 | 03:00:00 | 10,8 |
| 09.04.2019 | 04:00:00 | 10,7 |
| 09.04.2019 | 05:00:00 | 10,7 |
| 09.04.2019 | 06:00:00 | 10,7 |
| 09.04.2019 | 07:00:00 | 10,7 |
| 09.04.2019 | 08:00:00 | 10,7 |
| 09.04.2019 | 09:00:00 | 10,8 |
| 09.04.2019 | 10:00:00 | 10,9 |
| 09.04.2019 | 11:00:00 | 11   |
| 09.04.2019 | 12:00:00 | 11,2 |
| 09.04.2019 | 13:00:00 | 11,2 |
| 09.04.2019 | 14:00:00 | 11,2 |
| 09.04.2019 | 15:00:00 | 11,2 |
| 09.04.2019 | 16:00:00 | 11,2 |
| 09.04.2019 | 17:00:00 | 11,2 |
| 09.04.2019 | 18:00:00 | 11,1 |
| 09.04.2019 | 19:00:00 | 11   |
| 09.04.2019 | 20:00:00 | 11   |
| 09.04.2019 | 21:00:00 | 10,9 |
| 09.04.2019 | 22:00:00 | 10,9 |
| 09.04.2019 | 23:00:00 | 10,9 |
| 10.04.2019 | 00:00:00 | 10,8 |
| 10.04.2019 | 01:00:00 | 10,8 |
| 10.04.2019 | 02:00:00 | 10,7 |
| 10.04.2019 | 03:00:00 | 10,7 |
| 10.04.2019 | 04:00:00 | 10,7 |
| 10.04.2019 | 05:00:00 | 10,6 |
| 10.04.2019 | 06:00:00 | 10,6 |
| 10.04.2019 | 07:00:00 | 10,6 |
| 10.04.2019 | 08:00:00 | 10,6 |
| 10.04.2019 | 09:00:00 | 10,6 |
| 10.04.2019 | 10:00:00 | 10,8 |
| 10.04.2019 | 11:00:00 | 10,7 |
| 10.04.2019 | 12:00:00 | 10,8 |
| 10.04.2019 | 13:00:00 | 10,9 |
| 10.04.2019 | 14:00:00 | 11   |
| 10.04.2019 | 15:00:00 | 11   |
| 10.04.2019 | 16:00:00 | 11,1 |
| 10.04.2019 | 17:00:00 | 11   |
| 10.04.2019 | 18:00:00 | 11   |
| 10.04.2019 | 19:00:00 | 10,9 |
| 10.04.2019 | 20:00:00 | 10,8 |
| 10.04.2019 | 21:00:00 | 10,8 |
| 10.04.2019 | 22:00:00 | 10,7 |
| 10.04.2019 | 23:00:00 | 10,7 |
| 11.04.2019 | 00:00:00 | 10,6 |

|            |          |      |
|------------|----------|------|
| 11.04.2019 | 01:00:00 | 10,6 |
| 11.04.2019 | 02:00:00 | 10,5 |
| 11.04.2019 | 03:00:00 | 10,5 |
| 11.04.2019 | 04:00:00 | 10,4 |
| 11.04.2019 | 05:00:00 | 10,4 |
| 11.04.2019 | 06:00:00 | 10,4 |
| 11.04.2019 | 07:00:00 | 10,4 |
| 11.04.2019 | 08:00:00 | 10,4 |
| 11.04.2019 | 09:00:00 | 10,4 |
| 11.04.2019 | 10:00:00 | 10,5 |
| 11.04.2019 | 11:00:00 | 10,6 |
| 11.04.2019 | 12:00:00 | 10,6 |
| 11.04.2019 | 13:00:00 | 10,6 |
| 11.04.2019 | 14:00:00 | 10,6 |
| 11.04.2019 | 15:00:00 | 10,6 |
| 11.04.2019 | 16:00:00 | 10,6 |
| 11.04.2019 | 17:00:00 | 10,6 |
| 11.04.2019 | 18:00:00 | 10,5 |
| 11.04.2019 | 19:00:00 | 10,4 |
| 11.04.2019 | 20:00:00 | 10,4 |
| 11.04.2019 | 21:00:00 | 10,4 |
| 11.04.2019 | 22:00:00 | 10,3 |
| 11.04.2019 | 23:00:00 | 10,3 |
| 12.04.2019 | 00:00:00 | 10,2 |
| 12.04.2019 | 01:00:00 | 10,2 |
| 12.04.2019 | 02:00:00 | 10,2 |
| 12.04.2019 | 03:00:00 | 10,1 |
| 12.04.2019 | 04:00:00 | 10,1 |
| 12.04.2019 | 05:00:00 | 10,1 |
| 12.04.2019 | 06:00:00 | 10,1 |
| 12.04.2019 | 07:00:00 | 10   |
| 12.04.2019 | 08:00:00 | 10,1 |
| 12.04.2019 | 09:00:00 | 10,2 |
| 12.04.2019 | 10:00:00 | 10,3 |
| 12.04.2019 | 11:00:00 | 10,3 |
| 12.04.2019 | 12:00:00 | 10,4 |
| 12.04.2019 | 13:00:00 | 10,4 |
| 12.04.2019 | 14:00:00 | 10,4 |
| 12.04.2019 | 15:00:00 | 10,4 |
| 12.04.2019 | 16:00:00 | 10,4 |
| 12.04.2019 | 17:00:00 | 10,3 |
| 12.04.2019 | 18:00:00 | 10,2 |
| 12.04.2019 | 19:00:00 | 10,1 |
| 12.04.2019 | 20:00:00 | 10,1 |
| 12.04.2019 | 21:00:00 | 10   |
| 12.04.2019 | 22:00:00 | 10   |

|            |          |      |
|------------|----------|------|
| 12.04.2019 | 23:00:00 | 10   |
| 13.04.2019 | 00:00:00 | 10   |
| 13.04.2019 | 01:00:00 | 9,9  |
| 13.04.2019 | 02:00:00 | 9,9  |
| 13.04.2019 | 03:00:00 | 9,9  |
| 13.04.2019 | 04:00:00 | 9,9  |
| 13.04.2019 | 05:00:00 | 9,8  |
| 13.04.2019 | 06:00:00 | 9,8  |
| 13.04.2019 | 07:00:00 | 9,8  |
| 13.04.2019 | 08:00:00 | 9,8  |
| 13.04.2019 | 09:00:00 | 9,8  |
| 13.04.2019 | 10:00:00 | 9,9  |
| 13.04.2019 | 11:00:00 | 10   |
| 13.04.2019 | 12:00:00 | 10,1 |
| 13.04.2019 | 13:00:00 | 10,1 |
| 13.04.2019 | 14:00:00 | 10,2 |
| 13.04.2019 | 15:00:00 | 10,2 |
| 13.04.2019 | 16:00:00 | 10,2 |
| 13.04.2019 | 17:00:00 | 10,2 |
| 13.04.2019 | 18:00:00 | 10,1 |
| 13.04.2019 | 19:00:00 | 10,1 |
| 13.04.2019 | 20:00:00 | 10   |
| 13.04.2019 | 21:00:00 | 10   |
| 13.04.2019 | 22:00:00 | 9,9  |
| 13.04.2019 | 23:00:00 | 9,9  |
| 14.04.2019 | 00:00:00 | 9,9  |
| 14.04.2019 | 01:00:00 | 9,9  |
| 14.04.2019 | 02:00:00 | 9,9  |
| 14.04.2019 | 03:00:00 | 9,9  |
| 14.04.2019 | 04:00:00 | 9,8  |
| 14.04.2019 | 05:00:00 | 9,8  |
| 14.04.2019 | 06:00:00 | 9,8  |
| 14.04.2019 | 07:00:00 | 9,8  |
| 14.04.2019 | 08:00:00 | 9,8  |
| 14.04.2019 | 09:00:00 | 9,8  |
| 14.04.2019 | 10:00:00 | 9,8  |
| 14.04.2019 | 11:00:00 | 9,8  |
| 14.04.2019 | 12:00:00 | 9,9  |
| 14.04.2019 | 13:00:00 | 10   |
| 14.04.2019 | 14:00:00 | 10,1 |
| 14.04.2019 | 15:00:00 | 10,1 |
| 14.04.2019 | 16:00:00 | 10,1 |
| 14.04.2019 | 17:00:00 | 10,1 |
| 14.04.2019 | 18:00:00 | 10,1 |
| 14.04.2019 | 19:00:00 | 10   |
| 14.04.2019 | 20:00:00 | 10   |

|            |          |      |
|------------|----------|------|
| 14.04.2019 | 21:00:00 | 10   |
| 14.04.2019 | 22:00:00 | 9,9  |
| 14.04.2019 | 23:00:00 | 9,9  |
| 15.04.2019 | 00:00:00 | 9,9  |
| 15.04.2019 | 01:00:00 | 9,9  |
| 15.04.2019 | 02:00:00 | 9,8  |
| 15.04.2019 | 03:00:00 | 9,8  |
| 15.04.2019 | 04:00:00 | 9,8  |
| 15.04.2019 | 05:00:00 | 9,7  |
| 15.04.2019 | 06:00:00 | 9,7  |
| 15.04.2019 | 07:00:00 | 9,7  |
| 15.04.2019 | 08:00:00 | 9,8  |
| 15.04.2019 | 09:00:00 | 9,9  |
| 15.04.2019 | 10:00:00 | 10,1 |
| 15.04.2019 | 11:00:00 | 10,1 |
| 15.04.2019 | 12:00:00 | 10,2 |
| 15.04.2019 | 13:00:00 | 10,3 |
| 15.04.2019 | 14:00:00 | 10,3 |
| 15.04.2019 | 15:00:00 | 10,3 |
| 15.04.2019 | 16:00:00 | 10,3 |
| 15.04.2019 | 17:00:00 | 10,3 |
| 15.04.2019 | 18:00:00 | 10,2 |
| 15.04.2019 | 19:00:00 | 10,1 |
| 15.04.2019 | 20:00:00 | 10   |
| 15.04.2019 | 21:00:00 | 10   |
| 15.04.2019 | 22:00:00 | 9,9  |
| 15.04.2019 | 23:00:00 | 9,9  |
| 16.04.2019 | 00:00:00 | 9,9  |
| 16.04.2019 | 01:00:00 | 9,9  |
| 16.04.2019 | 02:00:00 | 9,8  |
| 16.04.2019 | 03:00:00 | 9,9  |
| 16.04.2019 | 04:00:00 | 9,9  |
| 16.04.2019 | 05:00:00 | 9,8  |
| 16.04.2019 | 06:00:00 | 9,8  |
| 16.04.2019 | 07:00:00 | 9,8  |
| 16.04.2019 | 08:00:00 | 9,9  |
| 16.04.2019 | 09:00:00 | 10   |
| 16.04.2019 | 10:00:00 | 10,1 |
| 16.04.2019 | 11:00:00 | 10,3 |
| 16.04.2019 | 12:00:00 | 10,4 |
| 16.04.2019 | 13:00:00 | 10,4 |
| 16.04.2019 | 14:00:00 | 10,4 |
| 16.04.2019 | 15:00:00 | 10,4 |
| 16.04.2019 | 16:00:00 | 10,4 |
| 16.04.2019 | 17:00:00 | 10,4 |
| 16.04.2019 | 18:00:00 | 10,3 |

|            |          |      |
|------------|----------|------|
| 16.04.2019 | 19:00:00 | 10,2 |
| 16.04.2019 | 20:00:00 | 10,2 |
| 16.04.2019 | 21:00:00 | 10,2 |
| 16.04.2019 | 22:00:00 | 10,2 |
| 16.04.2019 | 23:00:00 | 10,2 |
| 17.04.2019 | 00:00:00 | 10,2 |
| 17.04.2019 | 01:00:00 | 10,2 |
| 17.04.2019 | 02:00:00 | 10,2 |
| 17.04.2019 | 03:00:00 | 10,2 |
| 17.04.2019 | 04:00:00 | 10,1 |
| 17.04.2019 | 05:00:00 | 10   |
| 17.04.2019 | 06:00:00 | 10   |
| 17.04.2019 | 07:00:00 | 10   |
| 17.04.2019 | 08:00:00 | 10,1 |
| 17.04.2019 | 09:00:00 | 10,2 |
| 17.04.2019 | 10:00:00 | 10,3 |
| 17.04.2019 | 11:00:00 | 10,4 |
| 17.04.2019 | 12:00:00 | 10,6 |
| 17.04.2019 | 13:00:00 | 10,6 |
| 17.04.2019 | 14:00:00 | 10,5 |
| 17.04.2019 | 15:00:00 | 10,6 |
| 17.04.2019 | 16:00:00 | 10,5 |
| 17.04.2019 | 17:00:00 | 10,4 |
| 17.04.2019 | 18:00:00 | 10,4 |
| 17.04.2019 | 19:00:00 | 10,4 |
| 17.04.2019 | 20:00:00 | 10,3 |
| 17.04.2019 | 21:00:00 | 10,3 |
| 17.04.2019 | 22:00:00 | 10,3 |
| 17.04.2019 | 23:00:00 | 10,3 |
| 18.04.2019 | 00:00:00 | 10,4 |
| 18.04.2019 | 01:00:00 | 10,4 |
| 18.04.2019 | 02:00:00 | 10,4 |
| 18.04.2019 | 03:00:00 | 10,4 |
| 18.04.2019 | 04:00:00 | 10,4 |
| 18.04.2019 | 05:00:00 | 10,4 |
| 18.04.2019 | 06:00:00 | 10,4 |
| 18.04.2019 | 07:00:00 | 10,4 |
| 18.04.2019 | 08:00:00 | 10,4 |
| 18.04.2019 | 09:00:00 | 10,5 |
| 18.04.2019 | 10:00:00 | 10,7 |
| 18.04.2019 | 11:00:00 | 10,9 |
| 18.04.2019 | 12:00:00 | 11   |
| 18.04.2019 | 13:00:00 | 11   |
| 18.04.2019 | 14:00:00 | 11   |
| 18.04.2019 | 15:00:00 | 11   |
| 18.04.2019 | 16:00:00 | 11   |



|            |          |      |
|------------|----------|------|
| 18.04.2019 | 17:00:00 | 10,9 |
| 18.04.2019 | 18:00:00 | 10,9 |
| 18.04.2019 | 19:00:00 | 10,8 |
| 18.04.2019 | 20:00:00 | 10,8 |
| 18.04.2019 | 21:00:00 | 10,8 |
| 18.04.2019 | 22:00:00 | 10,8 |
| 18.04.2019 | 23:00:00 | 10,9 |
| 19.04.2019 | 00:00:00 | 10,9 |
| 19.04.2019 | 01:00:00 | 10,9 |
| 19.04.2019 | 02:00:00 | 10,9 |
| 19.04.2019 | 03:00:00 | 10,9 |
| 19.04.2019 | 04:00:00 | 10,9 |
| 19.04.2019 | 05:00:00 | 10,8 |
| 19.04.2019 | 06:00:00 | 10,8 |
| 19.04.2019 | 07:00:00 | 10,8 |
| 19.04.2019 | 08:00:00 | 10,9 |
| 19.04.2019 | 09:00:00 | 11   |
| 19.04.2019 | 10:00:00 | 11,1 |
| 19.04.2019 | 11:00:00 | 11,2 |
| 19.04.2019 | 12:00:00 | 11,3 |
| 19.04.2019 | 13:00:00 | 11,3 |
| 19.04.2019 | 14:00:00 | 11,3 |
| 19.04.2019 | 15:00:00 | 11,4 |
| 19.04.2019 | 16:00:00 | 11,4 |
| 19.04.2019 | 17:00:00 | 11,3 |
| 19.04.2019 | 18:00:00 | 11,3 |
| 19.04.2019 | 19:00:00 | 11,3 |
| 19.04.2019 | 20:00:00 | 11,3 |
| 19.04.2019 | 21:00:00 | 11,3 |
| 19.04.2019 | 22:00:00 | 11,3 |
| 19.04.2019 | 23:00:00 | 11,3 |
| 20.04.2019 | 00:00:00 | 11,3 |
| 20.04.2019 | 01:00:00 | 11,3 |
| 20.04.2019 | 02:00:00 | 11,2 |
| 20.04.2019 | 03:00:00 | 11,2 |
| 20.04.2019 | 04:00:00 | 11,1 |
| 20.04.2019 | 05:00:00 | 11,1 |
| 20.04.2019 | 06:00:00 | 11   |
| 20.04.2019 | 07:00:00 | 11   |
| 20.04.2019 | 08:00:00 | 11,1 |
| 20.04.2019 | 09:00:00 | 11,3 |
| 20.04.2019 | 10:00:00 | 11,4 |
| 20.04.2019 | 11:00:00 | 11,5 |
| 20.04.2019 | 12:00:00 | 11,6 |
| 20.04.2019 | 13:00:00 | 11,7 |
| 20.04.2019 | 14:00:00 | 11,6 |

|            |          |      |
|------------|----------|------|
| 20.04.2019 | 15:00:00 | 11,7 |
| 20.04.2019 | 16:00:00 | 11,7 |
| 20.04.2019 | 17:00:00 | 11,7 |
| 20.04.2019 | 18:00:00 | 11,7 |
| 20.04.2019 | 19:00:00 | 11,7 |
| 20.04.2019 | 20:00:00 | 11,7 |
| 20.04.2019 | 21:00:00 | 11,7 |
| 20.04.2019 | 22:00:00 | 11,7 |
| 20.04.2019 | 23:00:00 | 11,7 |
| 21.04.2019 | 00:00:00 | 11,6 |
| 21.04.2019 | 01:00:00 | 11,6 |
| 21.04.2019 | 02:00:00 | 11,6 |
| 21.04.2019 | 03:00:00 | 11,5 |
| 21.04.2019 | 04:00:00 | 11,4 |
| 21.04.2019 | 05:00:00 | 11,4 |
| 21.04.2019 | 06:00:00 | 11,3 |
| 21.04.2019 | 07:00:00 | 11,3 |
| 21.04.2019 | 08:00:00 | 11,4 |
| 21.04.2019 | 09:00:00 | 11,6 |
| 21.04.2019 | 10:00:00 | 11,6 |
| 21.04.2019 | 11:00:00 | 11,8 |
| 21.04.2019 | 12:00:00 | 11,9 |
| 21.04.2019 | 13:00:00 | 12   |
| 21.04.2019 | 14:00:00 | 12   |
| 21.04.2019 | 15:00:00 | 12,1 |
| 21.04.2019 | 16:00:00 | 12,1 |
| 21.04.2019 | 17:00:00 | 12,1 |
| 21.04.2019 | 18:00:00 | 12,1 |
| 21.04.2019 | 19:00:00 | 12,1 |
| 21.04.2019 | 20:00:00 | 12,1 |
| 21.04.2019 | 21:00:00 | 12   |
| 21.04.2019 | 22:00:00 | 12   |
| 21.04.2019 | 23:00:00 | 12   |
| 22.04.2019 | 00:00:00 | 11,9 |
| 22.04.2019 | 01:00:00 | 11,9 |
| 22.04.2019 | 02:00:00 | 11,8 |
| 22.04.2019 | 03:00:00 | 11,8 |
| 22.04.2019 | 04:00:00 | 11,7 |
| 22.04.2019 | 05:00:00 | 11,6 |
| 22.04.2019 | 06:00:00 | 11,6 |
| 22.04.2019 | 07:00:00 | 11,6 |
| 22.04.2019 | 08:00:00 | 11,7 |
| 22.04.2019 | 09:00:00 | 11,9 |
| 22.04.2019 | 10:00:00 | 11,9 |
| 22.04.2019 | 11:00:00 | 12,1 |
| 22.04.2019 | 12:00:00 | 12,3 |

|            |          |      |
|------------|----------|------|
| 22.04.2019 | 13:00:00 | 12,3 |
| 22.04.2019 | 14:00:00 | 12,3 |
| 22.04.2019 | 15:00:00 | 12,4 |
| 22.04.2019 | 16:00:00 | 12,4 |
| 22.04.2019 | 17:00:00 | 12,5 |
| 22.04.2019 | 18:00:00 | 12,4 |
| 22.04.2019 | 19:00:00 | 12,4 |
| 22.04.2019 | 20:00:00 | 12,3 |
| 22.04.2019 | 21:00:00 | 12,3 |
| 22.04.2019 | 22:00:00 | 12,3 |
| 22.04.2019 | 23:00:00 | 12,2 |
| 23.04.2019 | 00:00:00 | 12,2 |
| 23.04.2019 | 01:00:00 | 12,2 |
| 23.04.2019 | 02:00:00 | 12,1 |
| 23.04.2019 | 03:00:00 | 12,1 |
| 23.04.2019 | 04:00:00 | 12   |
| 23.04.2019 | 05:00:00 | 11,9 |
| 23.04.2019 | 06:00:00 | 11,9 |
| 23.04.2019 | 07:00:00 | 11,8 |
| 23.04.2019 | 08:00:00 | 11,9 |
| 23.04.2019 | 09:00:00 | 11,8 |
| 23.04.2019 | 10:00:00 | 11,8 |
| 23.04.2019 | 11:00:00 | 11,9 |
| 23.04.2019 | 12:00:00 | 11,9 |
| 23.04.2019 | 13:00:00 | 11,9 |
| 23.04.2019 | 14:00:00 | 12   |
| 23.04.2019 | 15:00:00 | 12   |
| 23.04.2019 | 16:00:00 | 12,1 |
| 23.04.2019 | 17:00:00 | 12,1 |
| 23.04.2019 | 18:00:00 | 12,1 |
| 23.04.2019 | 19:00:00 | 12,1 |
| 23.04.2019 | 20:00:00 | 12,1 |
| 23.04.2019 | 21:00:00 | 12,1 |
| 23.04.2019 | 22:00:00 | 12,1 |
| 23.04.2019 | 23:00:00 | 12,1 |
| 24.04.2019 | 00:00:00 | 12,1 |
| 24.04.2019 | 01:00:00 | 12   |
| 24.04.2019 | 02:00:00 | 12   |
| 24.04.2019 | 03:00:00 | 11,9 |
| 24.04.2019 | 04:00:00 | 11,9 |
| 24.04.2019 | 05:00:00 | 11,8 |
| 24.04.2019 | 06:00:00 | 11,8 |
| 24.04.2019 | 07:00:00 | 11,8 |
| 24.04.2019 | 08:00:00 | 11,8 |
| 24.04.2019 | 09:00:00 | 11,9 |
| 24.04.2019 | 10:00:00 | 12   |

|            |          |      |
|------------|----------|------|
| 24.04.2019 | 11:00:00 | 12,1 |
| 24.04.2019 | 12:00:00 | 12,3 |
| 24.04.2019 | 13:00:00 | 12,5 |
| 24.04.2019 | 14:00:00 | 12,6 |
| 24.04.2019 | 15:00:00 | 12,6 |
| 24.04.2019 | 16:00:00 | 12,6 |
| 24.04.2019 | 17:00:00 | 12,6 |
| 24.04.2019 | 18:00:00 | 12,5 |
| 24.04.2019 | 19:00:00 | 12,5 |
| 24.04.2019 | 20:00:00 | 12,4 |
| 24.04.2019 | 21:00:00 | 12,4 |
| 24.04.2019 | 22:00:00 | 12,4 |
| 24.04.2019 | 23:00:00 | 12,4 |
| 25.04.2019 | 00:00:00 | 12,3 |
| 25.04.2019 | 01:00:00 | 12,3 |
| 25.04.2019 | 02:00:00 | 12,3 |
| 25.04.2019 | 03:00:00 | 12,3 |
| 25.04.2019 | 04:00:00 | 12,3 |
| 25.04.2019 | 05:00:00 | 12,3 |
| 25.04.2019 | 06:00:00 | 12,3 |
| 25.04.2019 | 07:00:00 | 12,3 |
| 25.04.2019 | 08:00:00 | 12,4 |
| 25.04.2019 | 09:00:00 | 12,5 |
| 25.04.2019 | 10:00:00 | 12,7 |
| 25.04.2019 | 11:00:00 | 12,8 |
| 25.04.2019 | 12:00:00 | 13   |
| 25.04.2019 | 13:00:00 | 13,1 |
| 25.04.2019 | 14:00:00 | 13,2 |
| 25.04.2019 | 15:00:00 | 13,2 |
| 25.04.2019 | 16:00:00 | 13,3 |
| 25.04.2019 | 17:00:00 | 13,3 |
| 25.04.2019 | 18:00:00 | 13,2 |
| 25.04.2019 | 19:00:00 | 13,1 |
| 25.04.2019 | 20:00:00 | 13   |
| 25.04.2019 | 21:00:00 | 13   |
| 25.04.2019 | 22:00:00 | 12,9 |
| 25.04.2019 | 23:00:00 | 12,9 |
| 26.04.2019 | 00:00:00 | 12,9 |
| 26.04.2019 | 01:00:00 | 12,8 |
| 26.04.2019 | 02:00:00 | 12,8 |
| 26.04.2019 | 03:00:00 | 12,8 |
| 26.04.2019 | 04:00:00 | 12,7 |
| 26.04.2019 | 05:00:00 | 12,7 |
| 26.04.2019 | 06:00:00 | 12,7 |
| 26.04.2019 | 07:00:00 | 12,8 |
| 26.04.2019 | 08:00:00 | 13   |

|            |          |      |
|------------|----------|------|
| 26.04.2019 | 09:00:00 | 13,1 |
| 26.04.2019 | 10:00:00 | 13,3 |
| 26.04.2019 | 11:00:00 | 13,4 |
| 26.04.2019 | 12:00:00 | 13,4 |
| 26.04.2019 | 13:00:00 | 13,4 |
| 26.04.2019 | 14:00:00 | 13,4 |
| 26.04.2019 | 15:00:00 | 13,4 |
| 26.04.2019 | 16:00:00 | 13,4 |
| 26.04.2019 | 17:00:00 | 13,4 |
| 26.04.2019 | 18:00:00 | 13,4 |
| 26.04.2019 | 19:00:00 | 13,3 |
| 26.04.2019 | 20:00:00 | 13,2 |
| 26.04.2019 | 21:00:00 | 13,1 |
| 26.04.2019 | 22:00:00 | 13   |
| 26.04.2019 | 23:00:00 | 13   |
| 27.04.2019 | 00:00:00 | 13   |
| 27.04.2019 | 01:00:00 | 12,9 |
| 27.04.2019 | 02:00:00 | 12,9 |
| 27.04.2019 | 03:00:00 | 12,8 |
| 27.04.2019 | 04:00:00 | 12,8 |
| 27.04.2019 | 05:00:00 | 12,8 |
| 27.04.2019 | 06:00:00 | 12,7 |
| 27.04.2019 | 07:00:00 | 12,7 |
| 27.04.2019 | 08:00:00 | 12,8 |
| 27.04.2019 | 09:00:00 | 12,8 |
| 27.04.2019 | 10:00:00 | 12,9 |
| 27.04.2019 | 11:00:00 | 12,9 |
| 27.04.2019 | 12:00:00 | 13   |
| 27.04.2019 | 13:00:00 | 13   |
| 27.04.2019 | 14:00:00 | 13   |
| 27.04.2019 | 15:00:00 | 13   |
| 27.04.2019 | 16:00:00 | 13   |
| 27.04.2019 | 17:00:00 | 12,9 |
| 27.04.2019 | 18:00:00 | 12,9 |
| 27.04.2019 | 19:00:00 | 12,8 |
| 27.04.2019 | 20:00:00 | 12,8 |
| 27.04.2019 | 21:00:00 | 12,7 |
| 27.04.2019 | 22:00:00 | 12,7 |
| 27.04.2019 | 23:00:00 | 12,6 |
| 28.04.2019 | 00:00:00 | 12,5 |
| 28.04.2019 | 01:00:00 | 12,5 |
| 28.04.2019 | 02:00:00 | 12,4 |
| 28.04.2019 | 03:00:00 | 12,4 |
| 28.04.2019 | 04:00:00 | 12,3 |
| 28.04.2019 | 05:00:00 | 12,3 |
| 28.04.2019 | 06:00:00 | 12,3 |

|            |          |      |
|------------|----------|------|
| 28.04.2019 | 07:00:00 | 12,3 |
| 28.04.2019 | 08:00:00 | 12,4 |
| 28.04.2019 | 09:00:00 | 12,4 |
| 28.04.2019 | 10:00:00 | 12,5 |
| 28.04.2019 | 11:00:00 | 12,5 |
| 28.04.2019 | 12:00:00 | 12,6 |
| 28.04.2019 | 13:00:00 | 12,6 |
| 28.04.2019 | 14:00:00 | 12,6 |
| 28.04.2019 | 15:00:00 | 12,7 |
| 28.04.2019 | 16:00:00 | 12,6 |
| 28.04.2019 | 17:00:00 | 12,5 |
| 28.04.2019 | 18:00:00 | 12,4 |
| 28.04.2019 | 19:00:00 | 12,4 |
| 28.04.2019 | 20:00:00 | 12,3 |
| 28.04.2019 | 21:00:00 | 12,3 |
| 28.04.2019 | 22:00:00 | 12,2 |
| 28.04.2019 | 23:00:00 | 12,2 |
| 29.04.2019 | 00:00:00 | 12,2 |
| 29.04.2019 | 01:00:00 | 12,1 |
| 29.04.2019 | 02:00:00 | 12,1 |
| 29.04.2019 | 03:00:00 | 12,1 |
| 29.04.2019 | 04:00:00 | 12,1 |
| 29.04.2019 | 05:00:00 | 12   |
| 29.04.2019 | 06:00:00 | 12   |
| 29.04.2019 | 07:00:00 | 12   |
| 29.04.2019 | 08:00:00 | 12   |
| 29.04.2019 | 09:00:00 | 12   |
| 29.04.2019 | 10:00:00 | 12   |
| 29.04.2019 | 11:00:00 | 12,1 |
| 29.04.2019 | 12:00:00 | 12,1 |
| 29.04.2019 | 13:00:00 | 12,2 |
| 29.04.2019 | 14:00:00 | 12,2 |
| 29.04.2019 | 15:00:00 | 12,2 |
| 29.04.2019 | 16:00:00 | 12,2 |
| 29.04.2019 | 17:00:00 | 12,2 |
| 29.04.2019 | 18:00:00 | 12,2 |
| 29.04.2019 | 19:00:00 | 12,2 |
| 29.04.2019 | 20:00:00 | 12,1 |
| 29.04.2019 | 21:00:00 | 12,1 |
| 29.04.2019 | 22:00:00 | 12,1 |
| 29.04.2019 | 23:00:00 | 12,1 |
| 30.04.2019 | 00:00:00 | 12   |
| 30.04.2019 | 01:00:00 | 12   |
| 30.04.2019 | 02:00:00 | 12   |
| 30.04.2019 | 03:00:00 | 11,9 |
| 30.04.2019 | 04:00:00 | 11,9 |

|            |          |      |
|------------|----------|------|
| 30.04.2019 | 05:00:00 | 11,9 |
| 30.04.2019 | 06:00:00 | 11,8 |
| 30.04.2019 | 07:00:00 | 11,8 |
| 30.04.2019 | 08:00:00 | 11,8 |
| 30.04.2019 | 09:00:00 | 11,8 |
| 30.04.2019 | 10:00:00 | 11,8 |
| 30.04.2019 | 11:00:00 | 11,8 |
| 30.04.2019 | 12:00:00 | 11,7 |
| 30.04.2019 | 13:00:00 | 11,7 |
| 30.04.2019 | 14:00:00 | 11,8 |
| 30.04.2019 | 15:00:00 | 11,7 |
| 30.04.2019 | 16:00:00 | 11,7 |
| 30.04.2019 | 17:00:00 | 11,7 |
| 30.04.2019 | 18:00:00 | 11,7 |
| 30.04.2019 | 19:00:00 | 11,6 |
| 30.04.2019 | 20:00:00 | 11,6 |
| 30.04.2019 | 21:00:00 | 11,6 |
| 30.04.2019 | 22:00:00 | 11,5 |
| 30.04.2019 | 23:00:00 | 11,5 |
| 01.05.2019 | 00:00:00 | 11,5 |
| 01.05.2019 | 01:00:00 | 11,4 |
| 01.05.2019 | 02:00:00 | 11,4 |
| 01.05.2019 | 03:00:00 | 11,4 |
| 01.05.2019 | 04:00:00 | 11,4 |
| 01.05.2019 | 05:00:00 | 11,3 |
| 01.05.2019 | 06:00:00 | 11,3 |
| 01.05.2019 | 07:00:00 | 11,4 |
| 01.05.2019 | 08:00:00 | 11,4 |
| 01.05.2019 | 09:00:00 | 11,5 |
| 01.05.2019 | 10:00:00 | 11,6 |
| 01.05.2019 | 11:00:00 | 11,8 |
| 01.05.2019 | 12:00:00 | 11,8 |
| 01.05.2019 | 13:00:00 | 11,9 |
| 01.05.2019 | 14:00:00 | 11,9 |
| 01.05.2019 | 15:00:00 | 11,9 |
| 01.05.2019 | 16:00:00 | 11,8 |
| 01.05.2019 | 17:00:00 | 11,7 |
| 01.05.2019 | 18:00:00 | 11,6 |
| 01.05.2019 | 19:00:00 | 11,5 |
| 01.05.2019 | 20:00:00 | 11,5 |
| 01.05.2019 | 21:00:00 | 11,4 |
| 01.05.2019 | 22:00:00 | 11,3 |
| 01.05.2019 | 23:00:00 | 11,3 |
| 02.05.2019 | 00:00:00 | 11,2 |
| 02.05.2019 | 01:00:00 | 11,2 |
| 02.05.2019 | 02:00:00 | 11,1 |

|            |          |      |
|------------|----------|------|
| 02.05.2019 | 03:00:00 | 11,1 |
| 02.05.2019 | 04:00:00 | 11,1 |
| 02.05.2019 | 05:00:00 | 11   |
| 02.05.2019 | 06:00:00 | 11   |
| 02.05.2019 | 07:00:00 | 11,1 |
| 02.05.2019 | 08:00:00 | 11,2 |
| 02.05.2019 | 09:00:00 | 11,4 |
| 02.05.2019 | 10:00:00 | 11,6 |
| 02.05.2019 | 11:00:00 | 11,7 |
| 02.05.2019 | 12:00:00 | 11,9 |
| 02.05.2019 | 13:00:00 | 11,9 |
| 02.05.2019 | 14:00:00 | 11,9 |
| 02.05.2019 | 15:00:00 | 12   |
| 02.05.2019 | 16:00:00 | 12   |
| 02.05.2019 | 17:00:00 | 11,9 |
| 02.05.2019 | 18:00:00 | 11,8 |
| 02.05.2019 | 19:00:00 | 11,8 |
| 02.05.2019 | 20:00:00 | 11,7 |
| 02.05.2019 | 21:00:00 | 11,6 |
| 02.05.2019 | 22:00:00 | 11,6 |
| 02.05.2019 | 23:00:00 | 11,6 |
| 03.05.2019 | 00:00:00 | 11,5 |
| 03.05.2019 | 01:00:00 | 11,5 |
| 03.05.2019 | 02:00:00 | 11,5 |
| 03.05.2019 | 03:00:00 | 11,5 |
| 03.05.2019 | 04:00:00 | 11,5 |
| 03.05.2019 | 05:00:00 | 11,4 |
| 03.05.2019 | 06:00:00 | 11,4 |
| 03.05.2019 | 07:00:00 | 11,4 |
| 03.05.2019 | 08:00:00 | 11,3 |
| 03.05.2019 | 09:00:00 | 11,4 |
| 03.05.2019 | 10:00:00 | 11,4 |
| 03.05.2019 | 11:00:00 | 11,5 |
| 03.05.2019 | 12:00:00 | 11,6 |
| 03.05.2019 | 13:00:00 | 11,6 |
| 03.05.2019 | 14:00:00 | 11,7 |
| 03.05.2019 | 15:00:00 | 11,8 |
| 03.05.2019 | 16:00:00 | 11,8 |
| 03.05.2019 | 17:00:00 | 11,8 |
| 03.05.2019 | 18:00:00 | 11,8 |
| 03.05.2019 | 19:00:00 | 11,8 |
| 03.05.2019 | 20:00:00 | 11,8 |
| 03.05.2019 | 21:00:00 | 11,7 |
| 03.05.2019 | 22:00:00 | 11,7 |
| 03.05.2019 | 23:00:00 | 11,6 |
| 04.05.2019 | 00:00:00 | 11,6 |



|            |          |      |
|------------|----------|------|
| 04.05.2019 | 01:00:00 | 11,6 |
| 04.05.2019 | 02:00:00 | 11,5 |
| 04.05.2019 | 03:00:00 | 11,5 |
| 04.05.2019 | 04:00:00 | 11,4 |
| 04.05.2019 | 05:00:00 | 11,4 |
| 04.05.2019 | 06:00:00 | 11,3 |
| 04.05.2019 | 07:00:00 | 11,3 |
| 04.05.2019 | 08:00:00 | 11,4 |
| 04.05.2019 | 09:00:00 | 11,4 |
| 04.05.2019 | 10:00:00 | 11,6 |
| 04.05.2019 | 11:00:00 | 11,6 |
| 04.05.2019 | 12:00:00 | 11,6 |
| 04.05.2019 | 13:00:00 | 11,6 |
| 04.05.2019 | 14:00:00 | 11,6 |
| 04.05.2019 | 15:00:00 | 11,6 |
| 04.05.2019 | 16:00:00 | 11,6 |
| 04.05.2019 | 17:00:00 | 11,5 |
| 04.05.2019 | 18:00:00 | 11,5 |
| 04.05.2019 | 19:00:00 | 11,5 |
| 04.05.2019 | 20:00:00 | 11,4 |
| 04.05.2019 | 21:00:00 | 11,4 |
| 04.05.2019 | 22:00:00 | 11,3 |
| 04.05.2019 | 23:00:00 | 11,3 |
| 05.05.2019 | 00:00:00 | 11,3 |
| 05.05.2019 | 01:00:00 | 11,2 |
| 05.05.2019 | 02:00:00 | 11,1 |
| 05.05.2019 | 03:00:00 | 11,1 |
| 05.05.2019 | 04:00:00 | 11   |
| 05.05.2019 | 05:00:00 | 11   |
| 05.05.2019 | 06:00:00 | 11   |
| 05.05.2019 | 07:00:00 | 11   |
| 05.05.2019 | 08:00:00 | 11   |
| 05.05.2019 | 09:00:00 | 11   |
| 05.05.2019 | 10:00:00 | 11   |
| 05.05.2019 | 11:00:00 | 11,1 |
| 05.05.2019 | 12:00:00 | 11,1 |
| 05.05.2019 | 13:00:00 | 11,2 |
| 05.05.2019 | 14:00:00 | 11,2 |
| 05.05.2019 | 15:00:00 | 11,2 |
| 05.05.2019 | 16:00:00 | 11,1 |
| 05.05.2019 | 17:00:00 | 11,1 |
| 05.05.2019 | 18:00:00 | 11   |
| 05.05.2019 | 19:00:00 | 11   |
| 05.05.2019 | 20:00:00 | 10,9 |
| 05.05.2019 | 21:00:00 | 10,8 |
| 05.05.2019 | 22:00:00 | 10,8 |

|            |          |      |
|------------|----------|------|
| 05.05.2019 | 23:00:00 | 10,8 |
| 06.05.2019 | 00:00:00 | 10,8 |
| 06.05.2019 | 01:00:00 | 10,7 |
| 06.05.2019 | 02:00:00 | 10,7 |
| 06.05.2019 | 03:00:00 | 10,7 |
| 06.05.2019 | 04:00:00 | 10,6 |
| 06.05.2019 | 05:00:00 | 10,6 |
| 06.05.2019 | 06:00:00 | 10,6 |
| 06.05.2019 | 07:00:00 | 10,6 |
| 06.05.2019 | 08:00:00 | 10,6 |
| 06.05.2019 | 09:00:00 | 10,7 |
| 06.05.2019 | 10:00:00 | 10,8 |
| 06.05.2019 | 11:00:00 | 10,9 |
| 06.05.2019 | 12:00:00 | 10,9 |
| 06.05.2019 | 13:00:00 | 11   |
| 06.05.2019 | 14:00:00 | 11   |
| 06.05.2019 | 15:00:00 | 10,9 |
| 06.05.2019 | 16:00:00 | 10,9 |
| 06.05.2019 | 17:00:00 | 10,8 |
| 06.05.2019 | 18:00:00 | 10,8 |
| 06.05.2019 | 19:00:00 | 10,7 |
| 06.05.2019 | 20:00:00 | 10,6 |
| 06.05.2019 | 21:00:00 | 10,6 |
| 06.05.2019 | 22:00:00 | 10,5 |
| 06.05.2019 | 23:00:00 | 10,5 |
| 07.05.2019 | 00:00:00 | 10,4 |
| 07.05.2019 | 01:00:00 | 10,4 |
| 07.05.2019 | 02:00:00 | 10,3 |
| 07.05.2019 | 03:00:00 | 10,3 |
| 07.05.2019 | 04:00:00 | 10,3 |
| 07.05.2019 | 05:00:00 | 10,2 |
| 07.05.2019 | 06:00:00 | 10,3 |
| 07.05.2019 | 07:00:00 | 10,4 |
| 07.05.2019 | 08:00:00 | 10,5 |
| 07.05.2019 | 09:00:00 | 10,6 |
| 07.05.2019 | 10:00:00 | 10,6 |
| 07.05.2019 | 11:00:00 | 10,8 |
| 07.05.2019 | 12:00:00 | 10,9 |
| 07.05.2019 | 13:00:00 | 11   |
| 07.05.2019 | 14:00:00 | 11   |
| 07.05.2019 | 15:00:00 | 10,9 |
| 07.05.2019 | 16:00:00 | 10,9 |
| 07.05.2019 | 17:00:00 | 10,9 |
| 07.05.2019 | 18:00:00 | 10,8 |
| 07.05.2019 | 19:00:00 | 10,7 |
| 07.05.2019 | 20:00:00 | 10,7 |

|            |          |      |
|------------|----------|------|
| 07.05.2019 | 21:00:00 | 10,6 |
| 07.05.2019 | 22:00:00 | 10,6 |
| 07.05.2019 | 23:00:00 | 10,5 |
| 08.05.2019 | 00:00:00 | 10,5 |
| 08.05.2019 | 01:00:00 | 10,5 |
| 08.05.2019 | 02:00:00 | 10,4 |
| 08.05.2019 | 03:00:00 | 10,4 |
| 08.05.2019 | 04:00:00 | 10,3 |
| 08.05.2019 | 05:00:00 | 10,3 |
| 08.05.2019 | 06:00:00 | 10,4 |
| 08.05.2019 | 07:00:00 | 10,4 |
| 08.05.2019 | 08:00:00 | 10,5 |
| 08.05.2019 | 09:00:00 | 10,6 |
| 08.05.2019 | 10:00:00 | 10,7 |
| 08.05.2019 | 11:00:00 | 10,9 |
| 08.05.2019 | 12:00:00 | 11   |
| 08.05.2019 | 13:00:00 | 11,1 |
| 08.05.2019 | 14:00:00 | 11,2 |
| 08.05.2019 | 15:00:00 | 11,2 |
| 08.05.2019 | 16:00:00 | 11,2 |
| 08.05.2019 | 17:00:00 | 11,2 |
| 08.05.2019 | 18:00:00 | 11,2 |
| 08.05.2019 | 19:00:00 | 11,1 |
| 08.05.2019 | 20:00:00 | 11   |
| 08.05.2019 | 21:00:00 | 11   |
| 08.05.2019 | 22:00:00 | 10,9 |
| 08.05.2019 | 23:00:00 | 10,9 |
| 09.05.2019 | 00:00:00 | 10,9 |
| 09.05.2019 | 01:00:00 | 10,9 |
| 09.05.2019 | 02:00:00 | 10,9 |
| 09.05.2019 | 03:00:00 | 10,9 |
| 09.05.2019 | 04:00:00 | 10,9 |
| 09.05.2019 | 05:00:00 | 10,9 |
| 09.05.2019 | 06:00:00 | 10,8 |
| 09.05.2019 | 07:00:00 | 10,8 |
| 09.05.2019 | 08:00:00 | 10,8 |
| 09.05.2019 | 09:00:00 | 10,9 |
| 09.05.2019 | 10:00:00 | 10,9 |
| 09.05.2019 | 11:00:00 | 10,9 |
| 09.05.2019 | 12:00:00 | 11   |
| 09.05.2019 | 13:00:00 | 11,1 |
| 09.05.2019 | 14:00:00 | 11,3 |
| 09.05.2019 | 15:00:00 | 11,4 |
| 09.05.2019 | 16:00:00 | 11,4 |
| 09.05.2019 | 17:00:00 | 11,4 |
| 09.05.2019 | 18:00:00 | 11,4 |

|            |          |      |
|------------|----------|------|
| 09.05.2019 | 19:00:00 | 11,4 |
| 09.05.2019 | 20:00:00 | 11,3 |
| 09.05.2019 | 21:00:00 | 11,3 |
| 09.05.2019 | 22:00:00 | 11,2 |
| 09.05.2019 | 23:00:00 | 11,2 |
| 10.05.2019 | 00:00:00 | 11,1 |
| 10.05.2019 | 01:00:00 | 11,1 |
| 10.05.2019 | 02:00:00 | 11,1 |
| 10.05.2019 | 03:00:00 | 11   |
| 10.05.2019 | 04:00:00 | 11   |
| 10.05.2019 | 05:00:00 | 11   |
| 10.05.2019 | 06:00:00 | 11   |
| 10.05.2019 | 07:00:00 | 11,1 |
| 10.05.2019 | 08:00:00 | 11,2 |
| 10.05.2019 | 09:00:00 | 11,3 |
| 10.05.2019 | 10:00:00 | 11,5 |
| 10.05.2019 | 11:00:00 | 11,5 |
| 10.05.2019 | 12:00:00 | 11,6 |
| 10.05.2019 | 13:00:00 | 11,8 |
| 10.05.2019 | 14:00:00 | 11,8 |
| 10.05.2019 | 15:00:00 | 11,8 |
| 10.05.2019 | 16:00:00 | 11,8 |
| 10.05.2019 | 17:00:00 | 11,8 |
| 10.05.2019 | 18:00:00 | 11,7 |
| 10.05.2019 | 19:00:00 | 11,7 |
| 10.05.2019 | 20:00:00 | 11,6 |
| 10.05.2019 | 21:00:00 | 11,5 |
| 10.05.2019 | 22:00:00 | 11,4 |
| 10.05.2019 | 23:00:00 | 11,4 |
| 11.05.2019 | 00:00:00 | 11,3 |
| 11.05.2019 | 01:00:00 | 11,3 |
| 11.05.2019 | 02:00:00 | 11,3 |
| 11.05.2019 | 03:00:00 | 11,2 |
| 11.05.2019 | 04:00:00 | 11,2 |
| 11.05.2019 | 05:00:00 | 11,2 |
| 11.05.2019 | 06:00:00 | 11,2 |
| 11.05.2019 | 07:00:00 | 11,1 |
| 11.05.2019 | 08:00:00 | 11,2 |
| 11.05.2019 | 09:00:00 | 11,3 |
| 11.05.2019 | 10:00:00 | 11,4 |
| 11.05.2019 | 11:00:00 | 11,5 |
| 11.05.2019 | 12:00:00 | 11,6 |
| 11.05.2019 | 13:00:00 | 11,6 |
| 11.05.2019 | 14:00:00 | 11,7 |
| 11.05.2019 | 15:00:00 | 11,8 |
| 11.05.2019 | 16:00:00 | 11,8 |

|            |          |      |
|------------|----------|------|
| 11.05.2019 | 17:00:00 | 11,8 |
| 11.05.2019 | 18:00:00 | 11,8 |
| 11.05.2019 | 19:00:00 | 11,8 |
| 11.05.2019 | 20:00:00 | 11,7 |
| 11.05.2019 | 21:00:00 | 11,6 |
| 11.05.2019 | 22:00:00 | 11,6 |
| 11.05.2019 | 23:00:00 | 11,5 |
| 12.05.2019 | 00:00:00 | 11,4 |
| 12.05.2019 | 01:00:00 | 11,4 |
| 12.05.2019 | 02:00:00 | 11,3 |
| 12.05.2019 | 03:00:00 | 11,3 |
| 12.05.2019 | 04:00:00 | 11,2 |
| 12.05.2019 | 05:00:00 | 11,2 |
| 12.05.2019 | 06:00:00 | 11,2 |
| 12.05.2019 | 07:00:00 | 11,3 |
| 12.05.2019 | 08:00:00 | 11,3 |
| 12.05.2019 | 09:00:00 | 11,4 |
| 12.05.2019 | 10:00:00 | 11,5 |
| 12.05.2019 | 11:00:00 | 11,6 |
| 12.05.2019 | 12:00:00 | 11,6 |
| 12.05.2019 | 13:00:00 | 11,5 |
| 12.05.2019 | 14:00:00 | 11,5 |
| 12.05.2019 | 15:00:00 | 11,5 |
| 12.05.2019 | 16:00:00 | 11,5 |
| 12.05.2019 | 17:00:00 | 11,5 |
| 12.05.2019 | 18:00:00 | 11,5 |
| 12.05.2019 | 19:00:00 | 11,4 |
| 12.05.2019 | 20:00:00 | 11,4 |
| 12.05.2019 | 21:00:00 | 11,3 |
| 12.05.2019 | 22:00:00 | 11,3 |
| 12.05.2019 | 23:00:00 | 11,3 |
| 13.05.2019 | 00:00:00 | 11,2 |
| 13.05.2019 | 01:00:00 | 11,2 |
| 13.05.2019 | 02:00:00 | 11,2 |
| 13.05.2019 | 03:00:00 | 11,2 |
| 13.05.2019 | 04:00:00 | 11,2 |
| 13.05.2019 | 05:00:00 | 11,2 |
| 13.05.2019 | 06:00:00 | 11,2 |
| 13.05.2019 | 07:00:00 | 11,2 |
| 13.05.2019 | 08:00:00 | 11,2 |
| 13.05.2019 | 09:00:00 | 11,2 |
| 13.05.2019 | 10:00:00 | 11,2 |
| 13.05.2019 | 11:00:00 | 11,2 |
| 13.05.2019 | 12:00:00 | 11,3 |
| 13.05.2019 | 13:00:00 | 11,3 |
| 13.05.2019 | 14:00:00 | 11,3 |

|            |          |      |
|------------|----------|------|
| 13.05.2019 | 15:00:00 | 11,2 |
| 13.05.2019 | 16:00:00 | 11,2 |
| 13.05.2019 | 17:00:00 | 11,1 |
| 13.05.2019 | 18:00:00 | 11,1 |
| 13.05.2019 | 19:00:00 | 11,1 |
| 13.05.2019 | 20:00:00 | 11,1 |
| 13.05.2019 | 21:00:00 | 11   |
| 13.05.2019 | 22:00:00 | 11   |
| 13.05.2019 | 23:00:00 | 11   |
| 14.05.2019 | 00:00:00 | 11   |
| 14.05.2019 | 01:00:00 | 11   |
| 14.05.2019 | 02:00:00 | 11   |
| 14.05.2019 | 03:00:00 | 10,9 |
| 14.05.2019 | 04:00:00 | 10,9 |
| 14.05.2019 | 05:00:00 | 10,9 |
| 14.05.2019 | 06:00:00 | 10,9 |
| 14.05.2019 | 07:00:00 | 10,8 |
| 14.05.2019 | 08:00:00 | 10,9 |
| 14.05.2019 | 09:00:00 | 10,9 |
| 14.05.2019 | 10:00:00 | 10,9 |
| 14.05.2019 | 11:00:00 | 10,9 |
| 14.05.2019 | 12:00:00 | 10,9 |
| 14.05.2019 | 13:00:00 | 11   |
| 14.05.2019 | 14:00:00 | 11   |
| 14.05.2019 | 15:00:00 | 11   |
| 14.05.2019 | 16:00:00 | 10,9 |
| 14.05.2019 | 17:00:00 | 10,9 |
| 14.05.2019 | 18:00:00 | 10,9 |
| 14.05.2019 | 19:00:00 | 10,9 |
| 14.05.2019 | 20:00:00 | 10,9 |
| 14.05.2019 | 21:00:00 | 10,8 |
| 14.05.2019 | 22:00:00 | 10,8 |
| 14.05.2019 | 23:00:00 | 10,8 |
| 15.05.2019 | 00:00:00 | 10,8 |
| 15.05.2019 | 01:00:00 | 10,8 |
| 15.05.2019 | 02:00:00 | 10,7 |
| 15.05.2019 | 03:00:00 | 10,7 |
| 15.05.2019 | 04:00:00 | 10,7 |
| 15.05.2019 | 05:00:00 | 10,7 |
| 15.05.2019 | 06:00:00 | 10,7 |
| 15.05.2019 | 07:00:00 | 10,7 |
| 15.05.2019 | 08:00:00 | 10,7 |
| 15.05.2019 | 09:00:00 | 10,7 |
| 15.05.2019 | 10:00:00 | 10,7 |
| 15.05.2019 | 11:00:00 | 10,7 |
| 15.05.2019 | 12:00:00 | 10,7 |

|            |          |      |
|------------|----------|------|
| 15.05.2019 | 13:00:00 | 10,7 |
| 15.05.2019 | 14:00:00 | 10,7 |
| 15.05.2019 | 15:00:00 | 10,7 |
| 15.05.2019 | 16:00:00 | 10,7 |
| 15.05.2019 | 17:00:00 | 10,7 |
| 15.05.2019 | 18:00:00 | 10,6 |
| 15.05.2019 | 19:00:00 | 10,6 |
| 15.05.2019 | 20:00:00 | 10,6 |
| 15.05.2019 | 21:00:00 | 10,6 |
| 15.05.2019 | 22:00:00 | 10,5 |
| 15.05.2019 | 23:00:00 | 10,5 |
| 16.05.2019 | 00:00:00 | 10,5 |
| 16.05.2019 | 01:00:00 | 10,5 |
| 16.05.2019 | 02:00:00 | 10,5 |
| 16.05.2019 | 03:00:00 | 10,4 |
| 16.05.2019 | 04:00:00 | 10,4 |
| 16.05.2019 | 05:00:00 | 10,4 |
| 16.05.2019 | 06:00:00 | 10,4 |
| 16.05.2019 | 07:00:00 | 10,4 |
| 16.05.2019 | 08:00:00 | 10,4 |
| 16.05.2019 | 09:00:00 | 10,5 |
| 16.05.2019 | 10:00:00 | 10,5 |
| 16.05.2019 | 11:00:00 | 10,5 |
| 16.05.2019 | 12:00:00 | 10,6 |
| 16.05.2019 | 13:00:00 | 10,7 |
| 16.05.2019 | 14:00:00 | 10,7 |
| 16.05.2019 | 15:00:00 | 10,7 |
| 16.05.2019 | 16:00:00 | 10,7 |
| 16.05.2019 | 17:00:00 | 10,7 |
| 16.05.2019 | 18:00:00 | 10,7 |
| 16.05.2019 | 19:00:00 | 10,7 |
| 16.05.2019 | 20:00:00 | 10,7 |
| 16.05.2019 | 21:00:00 | 10,7 |
| 16.05.2019 | 22:00:00 | 10,7 |
| 16.05.2019 | 23:00:00 | 10,6 |
| 17.05.2019 | 00:00:00 | 10,6 |
| 17.05.2019 | 01:00:00 | 10,6 |
| 17.05.2019 | 02:00:00 | 10,6 |
| 17.05.2019 | 03:00:00 | 10,6 |
| 17.05.2019 | 04:00:00 | 10,6 |
| 17.05.2019 | 05:00:00 | 10,6 |
| 17.05.2019 | 06:00:00 | 10,6 |
| 17.05.2019 | 07:00:00 | 10,6 |
| 17.05.2019 | 08:00:00 | 10,7 |
| 17.05.2019 | 09:00:00 | 10,9 |
| 17.05.2019 | 10:00:00 | 11   |

|            |          |      |
|------------|----------|------|
| 17.05.2019 | 11:00:00 | 11,1 |
| 17.05.2019 | 12:00:00 | 11,1 |
| 17.05.2019 | 13:00:00 | 11,2 |
| 17.05.2019 | 14:00:00 | 11,2 |
| 17.05.2019 | 15:00:00 | 11,2 |
| 17.05.2019 | 16:00:00 | 11,2 |
| 17.05.2019 | 17:00:00 | 11,2 |
| 17.05.2019 | 18:00:00 | 11,2 |
| 17.05.2019 | 19:00:00 | 11,1 |
| 17.05.2019 | 20:00:00 | 11   |
| 17.05.2019 | 21:00:00 | 11   |
| 17.05.2019 | 22:00:00 | 11   |
| 17.05.2019 | 23:00:00 | 11   |
| 18.05.2019 | 00:00:00 | 11   |
| 18.05.2019 | 01:00:00 | 11   |
| 18.05.2019 | 02:00:00 | 10,9 |
| 18.05.2019 | 03:00:00 | 10,9 |
| 18.05.2019 | 04:00:00 | 10,9 |
| 18.05.2019 | 05:00:00 | 11   |
| 18.05.2019 | 06:00:00 | 11   |
| 18.05.2019 | 07:00:00 | 11,1 |
| 18.05.2019 | 08:00:00 | 11,2 |
| 18.05.2019 | 09:00:00 | 11,3 |
| 18.05.2019 | 10:00:00 | 11,4 |
| 18.05.2019 | 11:00:00 | 11,6 |
| 18.05.2019 | 12:00:00 | 11,7 |
| 18.05.2019 | 13:00:00 | 11,8 |
| 18.05.2019 | 14:00:00 | 11,8 |
| 18.05.2019 | 15:00:00 | 11,9 |
| 18.05.2019 | 16:00:00 | 11,9 |
| 18.05.2019 | 17:00:00 | 11,9 |
| 18.05.2019 | 18:00:00 | 11,9 |
| 18.05.2019 | 19:00:00 | 11,9 |
| 18.05.2019 | 20:00:00 | 11,8 |
| 18.05.2019 | 21:00:00 | 11,8 |
| 18.05.2019 | 22:00:00 | 11,8 |
| 18.05.2019 | 23:00:00 | 11,8 |
| 19.05.2019 | 00:00:00 | 11,8 |
| 19.05.2019 | 01:00:00 | 11,8 |
| 19.05.2019 | 02:00:00 | 11,8 |
| 19.05.2019 | 03:00:00 | 11,7 |
| 19.05.2019 | 04:00:00 | 11,7 |
| 19.05.2019 | 05:00:00 | 11,7 |
| 19.05.2019 | 06:00:00 | 11,8 |
| 19.05.2019 | 07:00:00 | 11,8 |
| 19.05.2019 | 08:00:00 | 11,8 |



|            |          |      |
|------------|----------|------|
| 19.05.2019 | 09:00:00 | 12,1 |
| 19.05.2019 | 10:00:00 | 12,3 |
| 19.05.2019 | 11:00:00 | 12,3 |
| 19.05.2019 | 12:00:00 | 12,3 |
| 19.05.2019 | 13:00:00 | 12,4 |
| 19.05.2019 | 14:00:00 | 12,5 |
| 19.05.2019 | 15:00:00 | 12,6 |
| 19.05.2019 | 16:00:00 | 12,6 |
| 19.05.2019 | 17:00:00 | 12,6 |
| 19.05.2019 | 18:00:00 | 12,6 |
| 19.05.2019 | 19:00:00 | 12,6 |
| 19.05.2019 | 20:00:00 | 12,5 |
| 19.05.2019 | 21:00:00 | 12,5 |
| 19.05.2019 | 22:00:00 | 12,4 |
| 19.05.2019 | 23:00:00 | 12,4 |
| 20.05.2019 | 00:00:00 | 12,3 |
| 20.05.2019 | 01:00:00 | 12,3 |
| 20.05.2019 | 02:00:00 | 12,3 |
| 20.05.2019 | 03:00:00 | 12,2 |
| 20.05.2019 | 04:00:00 | 12,2 |
| 20.05.2019 | 05:00:00 | 12,1 |
| 20.05.2019 | 06:00:00 | 12,1 |
| 20.05.2019 | 07:00:00 | 12,1 |
| 20.05.2019 | 08:00:00 | 12,1 |
| 20.05.2019 | 09:00:00 | 12,1 |
| 20.05.2019 | 10:00:00 | 12,3 |
| 20.05.2019 | 11:00:00 | 12,3 |
| 20.05.2019 | 12:00:00 | 12,5 |
| 20.05.2019 | 13:00:00 | 12,7 |
| 20.05.2019 | 14:00:00 | 12,8 |
| 20.05.2019 | 15:00:00 | 12,9 |
| 20.05.2019 | 16:00:00 | 13   |
| 20.05.2019 | 17:00:00 | 13   |
| 20.05.2019 | 18:00:00 | 12,9 |
| 20.05.2019 | 19:00:00 | 12,8 |
| 20.05.2019 | 20:00:00 | 12,7 |
| 20.05.2019 | 21:00:00 | 12,7 |
| 20.05.2019 | 22:00:00 | 12,6 |
| 20.05.2019 | 23:00:00 | 12,5 |
| 21.05.2019 | 00:00:00 | 12,5 |
| 21.05.2019 | 01:00:00 | 12,4 |
| 21.05.2019 | 02:00:00 | 12,4 |
| 21.05.2019 | 03:00:00 | 12,3 |
| 21.05.2019 | 04:00:00 | 12,2 |
| 21.05.2019 | 05:00:00 | 12,2 |
| 21.05.2019 | 06:00:00 | 12,2 |

|            |          |      |
|------------|----------|------|
| 21.05.2019 | 07:00:00 | 12,2 |
| 21.05.2019 | 08:00:00 | 12,3 |
| 21.05.2019 | 09:00:00 | 12,5 |
| 21.05.2019 | 10:00:00 | 12,6 |
| 21.05.2019 | 11:00:00 | 12,6 |
| 21.05.2019 | 12:00:00 | 12,7 |
| 21.05.2019 | 13:00:00 | 12,8 |
| 21.05.2019 | 14:00:00 | 12,9 |
| 21.05.2019 | 15:00:00 | 12,9 |
| 21.05.2019 | 16:00:00 | 12,9 |
| 21.05.2019 | 17:00:00 | 12,9 |
| 21.05.2019 | 18:00:00 | 12,8 |
| 21.05.2019 | 19:00:00 | 12,7 |
| 21.05.2019 | 20:00:00 | 12,7 |
| 21.05.2019 | 21:00:00 | 12,7 |
| 21.05.2019 | 22:00:00 | 12,7 |
| 21.05.2019 | 23:00:00 | 12,7 |
| 22.05.2019 | 00:00:00 | 12,6 |
| 22.05.2019 | 01:00:00 | 12,6 |
| 22.05.2019 | 02:00:00 | 12,6 |
| 22.05.2019 | 03:00:00 | 12,6 |
| 22.05.2019 | 04:00:00 | 12,6 |
| 22.05.2019 | 05:00:00 | 12,6 |
| 22.05.2019 | 06:00:00 | 12,6 |
| 22.05.2019 | 07:00:00 | 12,6 |
| 22.05.2019 | 08:00:00 | 12,6 |
| 22.05.2019 | 09:00:00 | 12,7 |
| 22.05.2019 | 10:00:00 | 12,7 |
| 22.05.2019 | 11:00:00 | 12,8 |
| 22.05.2019 | 12:00:00 | 12,8 |
| 22.05.2019 | 13:00:00 | 12,9 |
| 22.05.2019 | 14:00:00 | 12,9 |
| 22.05.2019 | 15:00:00 | 12,8 |
| 22.05.2019 | 16:00:00 | 12,8 |
| 22.05.2019 | 17:00:00 | 12,8 |
| 22.05.2019 | 18:00:00 | 12,8 |
| 22.05.2019 | 19:00:00 | 12,8 |
| 22.05.2019 | 20:00:00 | 12,9 |
| 22.05.2019 | 21:00:00 | 12,9 |
| 22.05.2019 | 22:00:00 | 12,9 |
| 22.05.2019 | 23:00:00 | 12,9 |
| 23.05.2019 | 00:00:00 | 12,9 |
| 23.05.2019 | 01:00:00 | 12,9 |
| 23.05.2019 | 02:00:00 | 12,9 |
| 23.05.2019 | 03:00:00 | 12,9 |
| 23.05.2019 | 04:00:00 | 12,8 |

|            |          |      |
|------------|----------|------|
| 23.05.2019 | 05:00:00 | 12,8 |
| 23.05.2019 | 06:00:00 | 12,8 |
| 23.05.2019 | 07:00:00 | 12,7 |
| 23.05.2019 | 08:00:00 | 12,7 |
| 23.05.2019 | 09:00:00 | 12,6 |
| 23.05.2019 | 10:00:00 | 12,5 |
| 23.05.2019 | 11:00:00 | 12,5 |
| 23.05.2019 | 12:00:00 | 12,4 |
| 23.05.2019 | 13:00:00 | 12,4 |
| 23.05.2019 | 14:00:00 | 12,3 |
| 23.05.2019 | 15:00:00 | 12,2 |
| 23.05.2019 | 16:00:00 | 12,2 |
| 23.05.2019 | 17:00:00 | 12,1 |
| 23.05.2019 | 18:00:00 | 12   |
| 23.05.2019 | 19:00:00 | 12   |
| 23.05.2019 | 20:00:00 | 11,9 |
| 23.05.2019 | 21:00:00 | 11,9 |
| 23.05.2019 | 22:00:00 | 11,9 |
| 23.05.2019 | 23:00:00 | 11,8 |
| 24.05.2019 | 00:00:00 | 11,8 |
| 24.05.2019 | 01:00:00 | 11,8 |
| 24.05.2019 | 02:00:00 | 11,7 |
| 24.05.2019 | 03:00:00 | 11,7 |
| 24.05.2019 | 04:00:00 | 11,7 |
| 24.05.2019 | 05:00:00 | 11,7 |
| 24.05.2019 | 06:00:00 | 11,8 |
| 24.05.2019 | 07:00:00 | 11,8 |
| 24.05.2019 | 08:00:00 | 11,9 |
| 24.05.2019 | 09:00:00 | 11,9 |
| 24.05.2019 | 10:00:00 | 12   |
| 24.05.2019 | 11:00:00 | 12,1 |
| 24.05.2019 | 12:00:00 | 12,2 |
| 24.05.2019 | 13:00:00 | 12,3 |
| 24.05.2019 | 14:00:00 | 12,3 |
| 24.05.2019 | 15:00:00 | 12,4 |
| 24.05.2019 | 16:00:00 | 12,4 |
| 24.05.2019 | 17:00:00 | 12,5 |
| 24.05.2019 | 18:00:00 | 12,5 |
| 24.05.2019 | 19:00:00 | 12,5 |
| 24.05.2019 | 20:00:00 | 12,5 |
| 24.05.2019 | 21:00:00 | 12,5 |
| 24.05.2019 | 22:00:00 | 12,5 |
| 24.05.2019 | 23:00:00 | 12,5 |
| 25.05.2019 | 00:00:00 | 12,5 |
| 25.05.2019 | 01:00:00 | 12,6 |
| 25.05.2019 | 02:00:00 | 12,6 |

|            |          |      |
|------------|----------|------|
| 25.05.2019 | 03:00:00 | 12,6 |
| 25.05.2019 | 04:00:00 | 12,5 |
| 25.05.2019 | 05:00:00 | 12,5 |
| 25.05.2019 | 06:00:00 | 12,5 |
| 25.05.2019 | 07:00:00 | 12,5 |
| 25.05.2019 | 08:00:00 | 12,5 |
| 25.05.2019 | 09:00:00 | 12,5 |
| 25.05.2019 | 10:00:00 | 12,6 |
| 25.05.2019 | 11:00:00 | 12,7 |
| 25.05.2019 | 12:00:00 | 12,8 |
| 25.05.2019 | 13:00:00 | 12,9 |
| 25.05.2019 | 14:00:00 | 13   |
| 25.05.2019 | 15:00:00 | 13   |
| 25.05.2019 | 16:00:00 | 13,1 |
| 25.05.2019 | 17:00:00 | 13,1 |
| 25.05.2019 | 18:00:00 | 13,1 |
| 25.05.2019 | 19:00:00 | 13,2 |
| 25.05.2019 | 20:00:00 | 13,2 |
| 25.05.2019 | 21:00:00 | 13,1 |
| 25.05.2019 | 22:00:00 | 13,1 |
| 25.05.2019 | 23:00:00 | 13,1 |
| 26.05.2019 | 00:00:00 | 13,2 |
| 26.05.2019 | 01:00:00 | 13,2 |
| 26.05.2019 | 02:00:00 | 13,2 |
| 26.05.2019 | 03:00:00 | 13,2 |
| 26.05.2019 | 04:00:00 | 13,1 |
| 26.05.2019 | 05:00:00 | 13,1 |
| 26.05.2019 | 06:00:00 | 13,1 |
| 26.05.2019 | 07:00:00 | 13,2 |
| 26.05.2019 | 08:00:00 | 13,2 |
| 26.05.2019 | 09:00:00 | 13,3 |
| 26.05.2019 | 10:00:00 | 13,3 |
| 26.05.2019 | 11:00:00 | 13,4 |
| 26.05.2019 | 12:00:00 | 13,4 |
| 26.05.2019 | 13:00:00 | 13,5 |
| 26.05.2019 | 14:00:00 | 13,5 |
| 26.05.2019 | 15:00:00 | 13,5 |
| 26.05.2019 | 16:00:00 | 13,6 |
| 26.05.2019 | 17:00:00 | 13,5 |
| 26.05.2019 | 18:00:00 | 13,5 |
| 26.05.2019 | 19:00:00 | 13,5 |
| 26.05.2019 | 20:00:00 | 13,5 |
| 26.05.2019 | 21:00:00 | 13,5 |
| 26.05.2019 | 22:00:00 | 13,5 |
| 26.05.2019 | 23:00:00 | 13,6 |
| 27.05.2019 | 00:00:00 | 13,6 |

|            |          |      |
|------------|----------|------|
| 27.05.2019 | 01:00:00 | 13,6 |
| 27.05.2019 | 02:00:00 | 13,6 |
| 27.05.2019 | 03:00:00 | 13,6 |
| 27.05.2019 | 04:00:00 | 13,6 |
| 27.05.2019 | 05:00:00 | 13,7 |
| 27.05.2019 | 06:00:00 | 13,7 |
| 27.05.2019 | 07:00:00 | 13,7 |
| 27.05.2019 | 08:00:00 | 13,8 |
| 27.05.2019 | 09:00:00 | 13,8 |
| 27.05.2019 | 10:00:00 | 13,8 |
| 27.05.2019 | 11:00:00 | 13,8 |
| 27.05.2019 | 12:00:00 | 13,7 |
| 27.05.2019 | 13:00:00 | 13,8 |
| 27.05.2019 | 14:00:00 | 13,8 |
| 27.05.2019 | 15:00:00 | 13,7 |
| 27.05.2019 | 16:00:00 | 13,7 |
| 27.05.2019 | 17:00:00 | 13,7 |
| 27.05.2019 | 18:00:00 | 13,7 |
| 27.05.2019 | 19:00:00 | 13,7 |
| 27.05.2019 | 20:00:00 | 13,7 |
| 27.05.2019 | 21:00:00 | 13,7 |
| 27.05.2019 | 22:00:00 | 13,7 |
| 27.05.2019 | 23:00:00 | 13,7 |
| 28.05.2019 | 00:00:00 | 13,6 |
| 28.05.2019 | 01:00:00 | 13,7 |
| 28.05.2019 | 02:00:00 | 13,7 |
| 28.05.2019 | 03:00:00 | 13,7 |
| 28.05.2019 | 04:00:00 | 13,7 |
| 28.05.2019 | 05:00:00 | 13,7 |
| 28.05.2019 | 06:00:00 | 13,8 |
| 28.05.2019 | 07:00:00 | 13,8 |
| 28.05.2019 | 08:00:00 | 13,8 |
| 28.05.2019 | 09:00:00 | 13,8 |
| 28.05.2019 | 10:00:00 | 13,8 |
| 28.05.2019 | 11:00:00 | 13,8 |
| 28.05.2019 | 12:00:00 | 13,8 |
| 28.05.2019 | 13:00:00 | 13,8 |
| 28.05.2019 | 14:00:00 | 13,8 |
| 28.05.2019 | 15:00:00 | 13,8 |
| 28.05.2019 | 16:00:00 | 13,8 |
| 28.05.2019 | 17:00:00 | 13,8 |
| 28.05.2019 | 18:00:00 | 13,8 |
| 28.05.2019 | 19:00:00 | 13,8 |
| 28.05.2019 | 20:00:00 | 13,7 |
| 28.05.2019 | 21:00:00 | 13,7 |
| 28.05.2019 | 22:00:00 | 13,7 |

|            |          |      |
|------------|----------|------|
| 28.05.2019 | 23:00:00 | 13,7 |
| 29.05.2019 | 00:00:00 | 13,6 |
| 29.05.2019 | 01:00:00 | 13,6 |
| 29.05.2019 | 02:00:00 | 13,6 |
| 29.05.2019 | 03:00:00 | 13,6 |
| 29.05.2019 | 04:00:00 | 13,6 |
| 29.05.2019 | 05:00:00 | 13,6 |
| 29.05.2019 | 06:00:00 | 13,6 |
| 29.05.2019 | 07:00:00 | 13,6 |
| 29.05.2019 | 08:00:00 | 13,7 |
| 29.05.2019 | 09:00:00 | 13,7 |
| 29.05.2019 | 10:00:00 | 13,7 |
| 29.05.2019 | 11:00:00 | 13,7 |
| 29.05.2019 | 12:00:00 | 13,7 |
| 29.05.2019 | 13:00:00 | 13,7 |
| 29.05.2019 | 14:00:00 | 13,7 |
| 29.05.2019 | 15:00:00 | 13,7 |
| 29.05.2019 | 16:00:00 | 13,7 |
| 29.05.2019 | 17:00:00 | 13,7 |
| 29.05.2019 | 18:00:00 | 13,6 |
| 29.05.2019 | 19:00:00 | 13,6 |
| 29.05.2019 | 20:00:00 | 13,6 |
| 29.05.2019 | 21:00:00 | 13,5 |
| 29.05.2019 | 22:00:00 | 13,5 |
| 29.05.2019 | 23:00:00 | 13,5 |
| 30.05.2019 | 00:00:00 | 13,5 |
| 30.05.2019 | 01:00:00 | 13,4 |
| 30.05.2019 | 02:00:00 | 13,4 |
| 30.05.2019 | 03:00:00 | 13,4 |
| 30.05.2019 | 04:00:00 | 13,3 |
| 30.05.2019 | 05:00:00 | 13,3 |
| 30.05.2019 | 06:00:00 | 13,2 |
| 30.05.2019 | 07:00:00 | 13,2 |
| 30.05.2019 | 08:00:00 | 13,1 |
| 30.05.2019 | 09:00:00 | 13   |
| 30.05.2019 | 10:00:00 | 13   |
| 30.05.2019 | 11:00:00 | 13   |
| 30.05.2019 | 12:00:00 | 13   |
| 30.05.2019 | 13:00:00 | 12,9 |
| 30.05.2019 | 14:00:00 | 12,9 |
| 30.05.2019 | 15:00:00 | 12,9 |
| 30.05.2019 | 16:00:00 | 12,9 |
| 30.05.2019 | 17:00:00 | 12,9 |
| 30.05.2019 | 18:00:00 | 12,8 |
| 30.05.2019 | 19:00:00 | 12,8 |
| 30.05.2019 | 20:00:00 | 12,8 |

|            |          |      |
|------------|----------|------|
| 30.05.2019 | 21:00:00 | 12,7 |
| 30.05.2019 | 22:00:00 | 12,7 |
| 30.05.2019 | 23:00:00 | 12,7 |
| 31.05.2019 | 00:00:00 | 12,7 |
| 31.05.2019 | 01:00:00 | 12,6 |
| 31.05.2019 | 02:00:00 | 12,6 |
| 31.05.2019 | 03:00:00 | 12,6 |
| 31.05.2019 | 04:00:00 | 12,6 |
| 31.05.2019 | 05:00:00 | 12,6 |
| 31.05.2019 | 06:00:00 | 12,6 |
| 31.05.2019 | 07:00:00 | 12,5 |
| 31.05.2019 | 08:00:00 | 12,5 |
| 31.05.2019 | 09:00:00 | 12,5 |
| 31.05.2019 | 10:00:00 | 12,5 |
| 31.05.2019 | 11:00:00 | 12,5 |
| 31.05.2019 | 12:00:00 | 12,6 |
| 31.05.2019 | 13:00:00 | 12,7 |
| 31.05.2019 | 14:00:00 | 12,7 |
| 31.05.2019 | 15:00:00 | 12,7 |
| 31.05.2019 | 16:00:00 | 12,7 |
| 31.05.2019 | 17:00:00 | 12,7 |
| 31.05.2019 | 18:00:00 | 12,7 |
| 31.05.2019 | 19:00:00 | 12,7 |
| 31.05.2019 | 20:00:00 | 12,6 |
| 31.05.2019 | 21:00:00 | 12,6 |
| 31.05.2019 | 22:00:00 | 12,5 |
| 31.05.2019 | 23:00:00 | 12,5 |
| 01.04.2020 | 00:00:00 | 7    |
| 01.04.2020 | 01:00:00 | 7    |
| 01.04.2020 | 02:00:00 | 7    |
| 01.04.2020 | 03:00:00 | 6,9  |
| 01.04.2020 | 04:00:00 | 6,9  |
| 01.04.2020 | 05:00:00 | 6,9  |
| 01.04.2020 | 06:00:00 | 6,9  |
| 01.04.2020 | 07:00:00 | 7,1  |
| 01.04.2020 | 08:00:00 | 7,3  |
| 01.04.2020 | 09:00:00 | 7,4  |
| 01.04.2020 | 10:00:00 | 7,7  |
| 01.04.2020 | 11:00:00 | 7,9  |
| 01.04.2020 | 12:00:00 | 7,9  |
| 01.04.2020 | 13:00:00 | 7,9  |
| 01.04.2020 | 14:00:00 | 7,9  |
| 01.04.2020 | 15:00:00 | 7,8  |
| 01.04.2020 | 16:00:00 | 7,9  |
| 01.04.2020 | 17:00:00 | 7,8  |
| 01.04.2020 | 18:00:00 | 7,7  |

|            |          |     |
|------------|----------|-----|
| 01.04.2020 | 19:00:00 | 7,6 |
| 01.04.2020 | 20:00:00 | 7,4 |
| 01.04.2020 | 21:00:00 | 7,4 |
| 01.04.2020 | 22:00:00 | 7,2 |
| 01.04.2020 | 23:00:00 | 7,1 |
| 02.04.2020 | 00:00:00 | 7,1 |
| 02.04.2020 | 01:00:00 | 6,9 |
| 02.04.2020 | 02:00:00 | 6,9 |
| 02.04.2020 | 03:00:00 | 6,9 |
| 02.04.2020 | 04:00:00 | 6,8 |
| 02.04.2020 | 05:00:00 | 7   |
| 02.04.2020 | 06:00:00 | 7   |
| 02.04.2020 | 07:00:00 | 7   |
| 02.04.2020 | 08:00:00 | 7,1 |
| 02.04.2020 | 09:00:00 | 7,3 |
| 02.04.2020 | 10:00:00 | 7,5 |
| 02.04.2020 | 11:00:00 | 7,7 |
| 02.04.2020 | 12:00:00 | 7,9 |
| 02.04.2020 | 13:00:00 | 7,8 |
| 02.04.2020 | 14:00:00 | 7,7 |
| 02.04.2020 | 15:00:00 | 7,8 |
| 02.04.2020 | 16:00:00 | 7,7 |
| 02.04.2020 | 17:00:00 | 7,6 |
| 02.04.2020 | 18:00:00 | 7,6 |
| 02.04.2020 | 19:00:00 | 7,4 |
| 02.04.2020 | 20:00:00 | 7,3 |
| 02.04.2020 | 21:00:00 | 7,2 |
| 02.04.2020 | 22:00:00 | 7,2 |
| 02.04.2020 | 23:00:00 | 7   |
| 03.04.2020 | 00:00:00 | 7   |
| 03.04.2020 | 01:00:00 | 7,1 |
| 03.04.2020 | 02:00:00 | 6,9 |
| 03.04.2020 | 03:00:00 | 6,9 |
| 03.04.2020 | 04:00:00 | 6,9 |
| 03.04.2020 | 05:00:00 | 7   |
| 03.04.2020 | 06:00:00 | 7,1 |
| 03.04.2020 | 07:00:00 | 7,1 |
| 03.04.2020 | 08:00:00 | 7,4 |
| 03.04.2020 | 09:00:00 | 7,6 |
| 03.04.2020 | 10:00:00 | 7,8 |
| 03.04.2020 | 11:00:00 | 8,1 |
| 03.04.2020 | 12:00:00 | 8,2 |
| 03.04.2020 | 13:00:00 | 8,1 |
| 03.04.2020 | 14:00:00 | 8,1 |
| 03.04.2020 | 15:00:00 | 8,1 |
| 03.04.2020 | 16:00:00 | 8,1 |



|            |          |     |
|------------|----------|-----|
| 03.04.2020 | 17:00:00 | 7,9 |
| 03.04.2020 | 18:00:00 | 7,9 |
| 03.04.2020 | 19:00:00 | 7,8 |
| 03.04.2020 | 20:00:00 | 7,7 |
| 03.04.2020 | 21:00:00 | 7,7 |
| 03.04.2020 | 22:00:00 | 7,6 |
| 03.04.2020 | 23:00:00 | 7,6 |
| 04.04.2020 | 00:00:00 | 7,5 |
| 04.04.2020 | 01:00:00 | 7,5 |
| 04.04.2020 | 02:00:00 | 7,5 |
| 04.04.2020 | 03:00:00 | 7,5 |
| 04.04.2020 | 04:00:00 | 7,6 |
| 04.04.2020 | 05:00:00 | 7,6 |
| 04.04.2020 | 06:00:00 | 7,6 |
| 04.04.2020 | 07:00:00 | 7,7 |
| 04.04.2020 | 08:00:00 | 7,8 |
| 04.04.2020 | 09:00:00 | 8   |
| 04.04.2020 | 10:00:00 | 8,2 |
| 04.04.2020 | 11:00:00 | 8,4 |
| 04.04.2020 | 12:00:00 | 8,6 |
| 04.04.2020 | 13:00:00 | 8,6 |
| 04.04.2020 | 14:00:00 | 8,6 |
| 04.04.2020 | 15:00:00 | 8,7 |
| 04.04.2020 | 16:00:00 | 8,7 |
| 04.04.2020 | 17:00:00 | 8,5 |
| 04.04.2020 | 18:00:00 | 8,4 |
| 04.04.2020 | 19:00:00 | 8,3 |
| 04.04.2020 | 20:00:00 | 8,2 |
| 04.04.2020 | 21:00:00 | 8,1 |
| 04.04.2020 | 22:00:00 | 8   |
| 04.04.2020 | 23:00:00 | 8   |
| 05.04.2020 | 00:00:00 | 7,8 |
| 05.04.2020 | 01:00:00 | 7,8 |
| 05.04.2020 | 02:00:00 | 7,7 |
| 05.04.2020 | 03:00:00 | 7,8 |
| 05.04.2020 | 04:00:00 | 7,7 |
| 05.04.2020 | 05:00:00 | 7,6 |
| 05.04.2020 | 06:00:00 | 7,6 |
| 05.04.2020 | 07:00:00 | 7,8 |
| 05.04.2020 | 08:00:00 | 8   |
| 05.04.2020 | 09:00:00 | 8,1 |
| 05.04.2020 | 10:00:00 | 8,4 |
| 05.04.2020 | 11:00:00 | 8,7 |
| 05.04.2020 | 12:00:00 | 8,9 |
| 05.04.2020 | 13:00:00 | 8,8 |
| 05.04.2020 | 14:00:00 | 8,8 |

|            |          |     |
|------------|----------|-----|
| 05.04.2020 | 15:00:00 | 8,9 |
| 05.04.2020 | 16:00:00 | 8,9 |
| 05.04.2020 | 17:00:00 | 8,9 |
| 05.04.2020 | 18:00:00 | 8,8 |
| 05.04.2020 | 19:00:00 | 8,7 |
| 05.04.2020 | 20:00:00 | 8,6 |
| 05.04.2020 | 21:00:00 | 8,6 |
| 05.04.2020 | 22:00:00 | 8,4 |
| 05.04.2020 | 23:00:00 | 8,3 |
| 06.04.2020 | 00:00:00 | 8,2 |
| 06.04.2020 | 01:00:00 | 8,2 |
| 06.04.2020 | 02:00:00 | 8,2 |
| 06.04.2020 | 03:00:00 | 8,2 |
| 06.04.2020 | 04:00:00 | 8,2 |
| 06.04.2020 | 05:00:00 | 8,2 |
| 06.04.2020 | 06:00:00 | 8,2 |
| 06.04.2020 | 07:00:00 | 8,3 |
| 06.04.2020 | 08:00:00 | 8,4 |
| 06.04.2020 | 09:00:00 | 8,6 |
| 06.04.2020 | 10:00:00 | 8,8 |
| 06.04.2020 | 11:00:00 | 8,9 |
| 06.04.2020 | 12:00:00 | 9   |
| 06.04.2020 | 13:00:00 | 9,1 |
| 06.04.2020 | 14:00:00 | 9,1 |
| 06.04.2020 | 15:00:00 | 9,2 |
| 06.04.2020 | 16:00:00 | 9,2 |
| 06.04.2020 | 17:00:00 | 9,1 |
| 06.04.2020 | 18:00:00 | 9   |
| 06.04.2020 | 19:00:00 | 8,9 |
| 06.04.2020 | 20:00:00 | 8,8 |
| 06.04.2020 | 21:00:00 | 8,6 |
| 06.04.2020 | 22:00:00 | 8,5 |
| 06.04.2020 | 23:00:00 | 8,5 |
| 07.04.2020 | 00:00:00 | 8,4 |
| 07.04.2020 | 01:00:00 | 8,4 |
| 07.04.2020 | 02:00:00 | 8,3 |
| 07.04.2020 | 03:00:00 | 8,3 |
| 07.04.2020 | 04:00:00 | 8,3 |
| 07.04.2020 | 05:00:00 | 8,3 |
| 07.04.2020 | 06:00:00 | 8,3 |
| 07.04.2020 | 07:00:00 | 8,3 |
| 07.04.2020 | 08:00:00 | 8,5 |
| 07.04.2020 | 09:00:00 | 8,6 |
| 07.04.2020 | 10:00:00 | 8,8 |
| 07.04.2020 | 11:00:00 | 9,1 |
| 07.04.2020 | 12:00:00 | 9,3 |

|            |          |     |
|------------|----------|-----|
| 07.04.2020 | 13:00:00 | 9,3 |
| 07.04.2020 | 14:00:00 | 9,4 |
| 07.04.2020 | 15:00:00 | 9,5 |
| 07.04.2020 | 16:00:00 | 9,5 |
| 07.04.2020 | 17:00:00 | 9,5 |
| 07.04.2020 | 18:00:00 | 9,4 |
| 07.04.2020 | 19:00:00 | 9,3 |
| 07.04.2020 | 20:00:00 | 9,2 |
| 07.04.2020 | 21:00:00 | 9,1 |
| 07.04.2020 | 22:00:00 | 8,9 |
| 07.04.2020 | 23:00:00 | 8,8 |
| 08.04.2020 | 00:00:00 | 8,7 |
| 08.04.2020 | 01:00:00 | 8,6 |
| 08.04.2020 | 02:00:00 | 8,5 |
| 08.04.2020 | 03:00:00 | 8,5 |
| 08.04.2020 | 04:00:00 | 8,5 |
| 08.04.2020 | 05:00:00 | 8,5 |
| 08.04.2020 | 06:00:00 | 8,6 |
| 08.04.2020 | 07:00:00 | 8,7 |
| 08.04.2020 | 08:00:00 | 8,8 |
| 08.04.2020 | 09:00:00 | 9   |
| 08.04.2020 | 10:00:00 | 9,2 |
| 08.04.2020 | 11:00:00 | 9,4 |
| 08.04.2020 | 12:00:00 | 9,6 |
| 08.04.2020 | 13:00:00 | 9,7 |
| 08.04.2020 | 14:00:00 | 9,7 |
| 08.04.2020 | 15:00:00 | 9,8 |
| 08.04.2020 | 16:00:00 | 9,8 |
| 08.04.2020 | 17:00:00 | 9,7 |
| 08.04.2020 | 18:00:00 | 9,6 |
| 08.04.2020 | 19:00:00 | 9,5 |
| 08.04.2020 | 20:00:00 | 9,4 |
| 08.04.2020 | 21:00:00 | 9,3 |
| 08.04.2020 | 22:00:00 | 9,2 |
| 08.04.2020 | 23:00:00 | 9,1 |
| 09.04.2020 | 00:00:00 | 9   |
| 09.04.2020 | 01:00:00 | 9   |
| 09.04.2020 | 02:00:00 | 8,9 |
| 09.04.2020 | 03:00:00 | 8,9 |
| 09.04.2020 | 04:00:00 | 8,9 |
| 09.04.2020 | 05:00:00 | 8,9 |
| 09.04.2020 | 06:00:00 | 9   |
| 09.04.2020 | 07:00:00 | 9,1 |
| 09.04.2020 | 08:00:00 | 9,2 |
| 09.04.2020 | 09:00:00 | 9,4 |
| 09.04.2020 | 10:00:00 | 9,7 |

|            |          |      |
|------------|----------|------|
| 09.04.2020 | 11:00:00 | 10   |
| 09.04.2020 | 12:00:00 | 10,1 |
| 09.04.2020 | 13:00:00 | 10,2 |
| 09.04.2020 | 14:00:00 | 10,2 |
| 09.04.2020 | 15:00:00 | 10,3 |
| 09.04.2020 | 16:00:00 | 10,3 |
| 09.04.2020 | 17:00:00 | 10,3 |
| 09.04.2020 | 18:00:00 | 10,2 |
| 09.04.2020 | 19:00:00 | 10,1 |
| 09.04.2020 | 20:00:00 | 9,9  |
| 09.04.2020 | 21:00:00 | 9,8  |
| 09.04.2020 | 22:00:00 | 9,7  |
| 09.04.2020 | 23:00:00 | 9,7  |
| 10.04.2020 | 00:00:00 | 9,6  |
| 10.04.2020 | 01:00:00 | 9,6  |
| 10.04.2020 | 02:00:00 | 9,6  |
| 10.04.2020 | 03:00:00 | 9,5  |
| 10.04.2020 | 04:00:00 | 9,5  |
| 10.04.2020 | 05:00:00 | 9,6  |
| 10.04.2020 | 06:00:00 | 9,6  |
| 10.04.2020 | 07:00:00 | 9,7  |
| 10.04.2020 | 08:00:00 | 9,8  |
| 10.04.2020 | 09:00:00 | 10,1 |
| 10.04.2020 | 10:00:00 | 10,4 |
| 10.04.2020 | 11:00:00 | 10,7 |
| 10.04.2020 | 12:00:00 | 10,9 |
| 10.04.2020 | 13:00:00 | 11   |
| 10.04.2020 | 14:00:00 | 10,9 |
| 10.04.2020 | 15:00:00 | 10,9 |
| 10.04.2020 | 16:00:00 | 10,9 |
| 10.04.2020 | 17:00:00 | 10,9 |
| 10.04.2020 | 18:00:00 | 10,8 |
| 10.04.2020 | 19:00:00 | 10,7 |
| 10.04.2020 | 20:00:00 | 10,6 |
| 10.04.2020 | 21:00:00 | 10,5 |
| 10.04.2020 | 22:00:00 | 10,3 |
| 10.04.2020 | 23:00:00 | 10,3 |
| 11.04.2020 | 00:00:00 | 10,2 |
| 11.04.2020 | 01:00:00 | 10,2 |
| 11.04.2020 | 02:00:00 | 10,1 |
| 11.04.2020 | 03:00:00 | 10,1 |
| 11.04.2020 | 04:00:00 | 10,1 |
| 11.04.2020 | 05:00:00 | 10,2 |
| 11.04.2020 | 06:00:00 | 10,3 |
| 11.04.2020 | 07:00:00 | 10,4 |
| 11.04.2020 | 08:00:00 | 10,5 |

|            |          |      |
|------------|----------|------|
| 11.04.2020 | 09:00:00 | 10,8 |
| 11.04.2020 | 10:00:00 | 10,9 |
| 11.04.2020 | 11:00:00 | 11,2 |
| 11.04.2020 | 12:00:00 | 11,4 |
| 11.04.2020 | 13:00:00 | 11,4 |
| 11.04.2020 | 14:00:00 | 11,4 |
| 11.04.2020 | 15:00:00 | 11,4 |
| 11.04.2020 | 16:00:00 | 11,4 |
| 11.04.2020 | 17:00:00 | 11,4 |
| 11.04.2020 | 18:00:00 | 11,3 |
| 11.04.2020 | 19:00:00 | 11,2 |
| 11.04.2020 | 20:00:00 | 11,1 |
| 11.04.2020 | 21:00:00 | 11   |
| 11.04.2020 | 22:00:00 | 10,9 |
| 11.04.2020 | 23:00:00 | 10,9 |
| 12.04.2020 | 00:00:00 | 10,8 |
| 12.04.2020 | 01:00:00 | 10,7 |
| 12.04.2020 | 02:00:00 | 10,7 |
| 12.04.2020 | 03:00:00 | 10,7 |
| 12.04.2020 | 04:00:00 | 10,6 |
| 12.04.2020 | 05:00:00 | 10,6 |
| 12.04.2020 | 06:00:00 | 10,8 |
| 12.04.2020 | 07:00:00 | 10,9 |
| 12.04.2020 | 08:00:00 | 11,2 |
| 12.04.2020 | 09:00:00 | 11,3 |
| 12.04.2020 | 10:00:00 | 11,5 |
| 12.04.2020 | 11:00:00 | 11,7 |
| 12.04.2020 | 12:00:00 | 12   |
| 12.04.2020 | 13:00:00 | 12   |
| 12.04.2020 | 14:00:00 | 11,9 |
| 12.04.2020 | 15:00:00 | 11,9 |
| 12.04.2020 | 16:00:00 | 11,9 |
| 12.04.2020 | 17:00:00 | 11,9 |
| 12.04.2020 | 18:00:00 | 11,8 |
| 12.04.2020 | 19:00:00 | 11,7 |
| 12.04.2020 | 20:00:00 | 11,6 |
| 12.04.2020 | 21:00:00 | 11,5 |
| 12.04.2020 | 22:00:00 | 11,4 |
| 12.04.2020 | 23:00:00 | 11,4 |
| 13.04.2020 | 00:00:00 | 11,3 |
| 13.04.2020 | 01:00:00 | 11,3 |
| 13.04.2020 | 02:00:00 | 11,3 |
| 13.04.2020 | 03:00:00 | 11,3 |
| 13.04.2020 | 04:00:00 | 11,4 |
| 13.04.2020 | 05:00:00 | 11,4 |
| 13.04.2020 | 06:00:00 | 11,4 |

|            |          |      |
|------------|----------|------|
| 13.04.2020 | 07:00:00 | 11,7 |
| 13.04.2020 | 08:00:00 | 11,8 |
| 13.04.2020 | 09:00:00 | 11,9 |
| 13.04.2020 | 10:00:00 | 12,1 |
| 13.04.2020 | 11:00:00 | 12,2 |
| 13.04.2020 | 12:00:00 | 12,3 |
| 13.04.2020 | 13:00:00 | 12,3 |
| 13.04.2020 | 14:00:00 | 12,4 |
| 13.04.2020 | 15:00:00 | 12,4 |
| 13.04.2020 | 16:00:00 | 12,3 |
| 13.04.2020 | 17:00:00 | 12,2 |
| 13.04.2020 | 18:00:00 | 12,2 |
| 13.04.2020 | 19:00:00 | 12,1 |
| 13.04.2020 | 20:00:00 | 11,9 |
| 13.04.2020 | 21:00:00 | 11,7 |
| 13.04.2020 | 22:00:00 | 11,6 |
| 13.04.2020 | 23:00:00 | 11,5 |
| 14.04.2020 | 00:00:00 | 11,5 |
| 14.04.2020 | 01:00:00 | 11,5 |
| 14.04.2020 | 02:00:00 | 11,5 |
| 14.04.2020 | 03:00:00 | 11,5 |
| 14.04.2020 | 04:00:00 | 11,5 |
| 14.04.2020 | 05:00:00 | 11,6 |
| 14.04.2020 | 06:00:00 | 11,7 |
| 14.04.2020 | 07:00:00 | 11,7 |
| 14.04.2020 | 08:00:00 | 11,8 |
| 14.04.2020 | 09:00:00 | 12   |
| 14.04.2020 | 10:00:00 | 12   |
| 14.04.2020 | 11:00:00 | 12   |
| 14.04.2020 | 12:00:00 | 12,1 |
| 14.04.2020 | 13:00:00 | 12,1 |
| 14.04.2020 | 14:00:00 | 12   |
| 14.04.2020 | 15:00:00 | 11,9 |
| 14.04.2020 | 16:00:00 | 11,9 |
| 14.04.2020 | 17:00:00 | 11,8 |
| 14.04.2020 | 18:00:00 | 11,8 |
| 14.04.2020 | 19:00:00 | 11,8 |
| 14.04.2020 | 20:00:00 | 11,5 |
| 14.04.2020 | 21:00:00 | 11,5 |
| 14.04.2020 | 22:00:00 | 11,4 |
| 14.04.2020 | 23:00:00 | 11,4 |
| 15.04.2020 | 00:00:00 | 11,4 |
| 15.04.2020 | 01:00:00 | 11,4 |
| 15.04.2020 | 02:00:00 | 11,4 |
| 15.04.2020 | 03:00:00 | 11,4 |
| 15.04.2020 | 04:00:00 | 11,4 |

|            |          |      |
|------------|----------|------|
| 15.04.2020 | 05:00:00 | 11,4 |
| 15.04.2020 | 06:00:00 | 11,4 |
| 15.04.2020 | 07:00:00 | 11,7 |
| 15.04.2020 | 08:00:00 | 11,8 |
| 15.04.2020 | 09:00:00 | 11,9 |
| 15.04.2020 | 10:00:00 | 12,1 |
| 15.04.2020 | 11:00:00 | 12,4 |
| 15.04.2020 | 12:00:00 | 12,4 |
| 15.04.2020 | 13:00:00 | 12,5 |
| 15.04.2020 | 14:00:00 | 12,4 |
| 15.04.2020 | 15:00:00 | 12,4 |
| 15.04.2020 | 16:00:00 | 12,4 |
| 15.04.2020 | 17:00:00 | 12,4 |
| 15.04.2020 | 18:00:00 | 12,2 |
| 15.04.2020 | 19:00:00 | 12,2 |
| 15.04.2020 | 20:00:00 | 12   |
| 15.04.2020 | 21:00:00 | 11,8 |
| 15.04.2020 | 22:00:00 | 11,8 |
| 15.04.2020 | 23:00:00 | 11,8 |
| 16.04.2020 | 00:00:00 | 11,6 |
| 16.04.2020 | 01:00:00 | 11,6 |
| 16.04.2020 | 02:00:00 | 11,6 |
| 16.04.2020 | 03:00:00 | 11,6 |
| 16.04.2020 | 04:00:00 | 11,7 |
| 16.04.2020 | 05:00:00 | 11,8 |
| 16.04.2020 | 06:00:00 | 11,9 |
| 16.04.2020 | 07:00:00 | 12   |
| 16.04.2020 | 08:00:00 | 12,2 |
| 16.04.2020 | 09:00:00 | 12,3 |
| 16.04.2020 | 10:00:00 | 12,6 |
| 16.04.2020 | 11:00:00 | 12,7 |
| 16.04.2020 | 12:00:00 | 12,9 |
| 16.04.2020 | 13:00:00 | 13   |
| 16.04.2020 | 14:00:00 | 12,8 |
| 16.04.2020 | 15:00:00 | 12,8 |
| 16.04.2020 | 16:00:00 | 12,8 |
| 16.04.2020 | 17:00:00 | 12,8 |
| 16.04.2020 | 18:00:00 | 12,7 |
| 16.04.2020 | 19:00:00 | 12,6 |
| 16.04.2020 | 20:00:00 | 12,5 |
| 16.04.2020 | 21:00:00 | 12,4 |
| 16.04.2020 | 22:00:00 | 12,3 |
| 16.04.2020 | 23:00:00 | 12,3 |
| 17.04.2020 | 00:00:00 | 12,2 |
| 17.04.2020 | 01:00:00 | 12,2 |
| 17.04.2020 | 02:00:00 | 12,3 |

|            |          |      |
|------------|----------|------|
| 17.04.2020 | 03:00:00 | 12,2 |
| 17.04.2020 | 04:00:00 | 12,3 |
| 17.04.2020 | 05:00:00 | 12,3 |
| 17.04.2020 | 06:00:00 | 12,5 |
| 17.04.2020 | 07:00:00 | 12,6 |
| 17.04.2020 | 08:00:00 | 12,8 |
| 17.04.2020 | 09:00:00 | 13   |
| 17.04.2020 | 10:00:00 | 13   |
| 17.04.2020 | 11:00:00 | 13,2 |
| 17.04.2020 | 12:00:00 | 13,3 |
| 17.04.2020 | 13:00:00 | 13,4 |
| 17.04.2020 | 14:00:00 | 13,3 |
| 17.04.2020 | 15:00:00 | 13,3 |
| 17.04.2020 | 16:00:00 | 13,3 |
| 17.04.2020 | 17:00:00 | 13,1 |
| 17.04.2020 | 18:00:00 | 13   |
| 17.04.2020 | 19:00:00 | 12,9 |
| 17.04.2020 | 20:00:00 | 12,8 |
| 17.04.2020 | 21:00:00 | 12,7 |
| 17.04.2020 | 22:00:00 | 12,6 |
| 17.04.2020 | 23:00:00 | 12,5 |
| 18.04.2020 | 00:00:00 | 12,4 |
| 18.04.2020 | 01:00:00 | 12,4 |
| 18.04.2020 | 02:00:00 | 12,4 |
| 18.04.2020 | 03:00:00 | 12,4 |
| 18.04.2020 | 04:00:00 | 12,4 |
| 18.04.2020 | 05:00:00 | 12,4 |
| 18.04.2020 | 06:00:00 | 12,5 |
| 18.04.2020 | 07:00:00 | 12,6 |
| 18.04.2020 | 08:00:00 | 12,8 |
| 18.04.2020 | 09:00:00 | 13   |
| 18.04.2020 | 10:00:00 | 13,2 |
| 18.04.2020 | 11:00:00 | 13,3 |
| 18.04.2020 | 12:00:00 | 13,5 |
| 18.04.2020 | 13:00:00 | 13,6 |
| 18.04.2020 | 14:00:00 | 13,5 |
| 18.04.2020 | 15:00:00 | 13,5 |
| 18.04.2020 | 16:00:00 | 13,4 |
| 18.04.2020 | 17:00:00 | 13,4 |
| 18.04.2020 | 18:00:00 | 13,2 |
| 18.04.2020 | 19:00:00 | 13,1 |
| 18.04.2020 | 20:00:00 | 13   |
| 18.04.2020 | 21:00:00 | 13   |
| 18.04.2020 | 22:00:00 | 12,9 |
| 18.04.2020 | 23:00:00 | 12,9 |
| 19.04.2020 | 00:00:00 | 12,8 |



|            |          |      |
|------------|----------|------|
| 19.04.2020 | 01:00:00 | 12,8 |
| 19.04.2020 | 02:00:00 | 12,8 |
| 19.04.2020 | 03:00:00 | 12,8 |
| 19.04.2020 | 04:00:00 | 12,9 |
| 19.04.2020 | 05:00:00 | 12,9 |
| 19.04.2020 | 06:00:00 | 13   |
| 19.04.2020 | 07:00:00 | 13   |
| 19.04.2020 | 08:00:00 | 13,1 |
| 19.04.2020 | 09:00:00 | 13,2 |
| 19.04.2020 | 10:00:00 | 13,2 |
| 19.04.2020 | 11:00:00 | 13,2 |
| 19.04.2020 | 12:00:00 | 13,3 |
| 19.04.2020 | 13:00:00 | 13,3 |
| 19.04.2020 | 14:00:00 | 13,4 |
| 19.04.2020 | 15:00:00 | 13,4 |
| 19.04.2020 | 16:00:00 | 13,3 |
| 19.04.2020 | 17:00:00 | 13,3 |
| 19.04.2020 | 18:00:00 | 13,2 |
| 19.04.2020 | 19:00:00 | 13,1 |
| 19.04.2020 | 20:00:00 | 13,1 |
| 19.04.2020 | 21:00:00 | 13   |
| 19.04.2020 | 22:00:00 | 12,9 |
| 19.04.2020 | 23:00:00 | 12,8 |
| 20.04.2020 | 00:00:00 | 12,8 |
| 20.04.2020 | 01:00:00 | 12,7 |
| 20.04.2020 | 02:00:00 | 12,7 |
| 20.04.2020 | 03:00:00 | 12,7 |
| 20.04.2020 | 04:00:00 | 12,6 |
| 20.04.2020 | 05:00:00 | 12,7 |
| 20.04.2020 | 06:00:00 | 12,8 |
| 20.04.2020 | 07:00:00 | 12,9 |
| 20.04.2020 | 08:00:00 | 13   |
| 20.04.2020 | 09:00:00 | 13,2 |
| 20.04.2020 | 10:00:00 | 13,5 |
| 20.04.2020 | 11:00:00 | 13,6 |
| 20.04.2020 | 12:00:00 | 13,6 |
| 20.04.2020 | 13:00:00 | 13,6 |
| 20.04.2020 | 14:00:00 | 13,5 |
| 20.04.2020 | 15:00:00 | 13,5 |
| 20.04.2020 | 16:00:00 | 13,4 |
| 20.04.2020 | 17:00:00 | 13,3 |
| 20.04.2020 | 18:00:00 | 13,2 |
| 20.04.2020 | 19:00:00 | 13,1 |
| 20.04.2020 | 20:00:00 | 12,9 |
| 20.04.2020 | 21:00:00 | 12,8 |
| 20.04.2020 | 22:00:00 | 12,7 |

|            |          |      |
|------------|----------|------|
| 20.04.2020 | 23:00:00 | 12,7 |
| 21.04.2020 | 00:00:00 | 12,6 |
| 21.04.2020 | 01:00:00 | 12,5 |
| 21.04.2020 | 02:00:00 | 12,5 |
| 21.04.2020 | 03:00:00 | 12,4 |
| 21.04.2020 | 04:00:00 | 12,4 |
| 21.04.2020 | 05:00:00 | 12,5 |
| 21.04.2020 | 06:00:00 | 12,5 |
| 21.04.2020 | 07:00:00 | 12,6 |
| 21.04.2020 | 08:00:00 | 12,7 |
| 21.04.2020 | 09:00:00 | 12,8 |
| 21.04.2020 | 10:00:00 | 13   |
| 21.04.2020 | 11:00:00 | 13   |
| 21.04.2020 | 12:00:00 | 13,2 |
| 21.04.2020 | 13:00:00 | 13,2 |
| 21.04.2020 | 14:00:00 | 13   |
| 21.04.2020 | 15:00:00 | 12,9 |
| 21.04.2020 | 16:00:00 | 12,9 |
| 21.04.2020 | 17:00:00 | 12,8 |
| 21.04.2020 | 18:00:00 | 12,7 |
| 21.04.2020 | 19:00:00 | 12,6 |
| 21.04.2020 | 20:00:00 | 12,5 |
| 21.04.2020 | 21:00:00 | 12,4 |
| 21.04.2020 | 22:00:00 | 12,4 |
| 21.04.2020 | 23:00:00 | 12,4 |
| 22.04.2020 | 00:00:00 | 12,4 |
| 22.04.2020 | 01:00:00 | 12,4 |
| 22.04.2020 | 02:00:00 | 12,4 |
| 22.04.2020 | 03:00:00 | 12,4 |
| 22.04.2020 | 04:00:00 | 12,4 |
| 22.04.2020 | 05:00:00 | 12,3 |
| 22.04.2020 | 06:00:00 | 12,4 |
| 22.04.2020 | 07:00:00 | 12,4 |
| 22.04.2020 | 08:00:00 | 12,5 |
| 22.04.2020 | 09:00:00 | 12,6 |
| 22.04.2020 | 10:00:00 | 12,7 |
| 22.04.2020 | 11:00:00 | 12,8 |
| 22.04.2020 | 12:00:00 | 12,9 |
| 22.04.2020 | 13:00:00 | 12,9 |
| 22.04.2020 | 14:00:00 | 12,8 |
| 22.04.2020 | 15:00:00 | 12,8 |
| 22.04.2020 | 16:00:00 | 12,7 |
| 22.04.2020 | 17:00:00 | 12,7 |
| 22.04.2020 | 18:00:00 | 12,6 |
| 22.04.2020 | 19:00:00 | 12,5 |
| 22.04.2020 | 20:00:00 | 12,4 |

|            |          |      |
|------------|----------|------|
| 22.04.2020 | 21:00:00 | 12,3 |
| 22.04.2020 | 22:00:00 | 12,3 |
| 22.04.2020 | 23:00:00 | 12,3 |
| 23.04.2020 | 00:00:00 | 12,2 |
| 23.04.2020 | 01:00:00 | 12,3 |
| 23.04.2020 | 02:00:00 | 12,3 |
| 23.04.2020 | 03:00:00 | 12,4 |
| 23.04.2020 | 04:00:00 | 12,3 |
| 23.04.2020 | 05:00:00 | 12,4 |
| 23.04.2020 | 06:00:00 | 12,4 |
| 23.04.2020 | 07:00:00 | 12,5 |
| 23.04.2020 | 08:00:00 | 12,6 |
| 23.04.2020 | 09:00:00 | 12,7 |
| 23.04.2020 | 10:00:00 | 12,8 |
| 23.04.2020 | 11:00:00 | 12,9 |
| 23.04.2020 | 12:00:00 | 13,1 |
| 23.04.2020 | 13:00:00 | 13,2 |
| 23.04.2020 | 14:00:00 | 13,1 |
| 23.04.2020 | 15:00:00 | 13   |
| 23.04.2020 | 16:00:00 | 13   |
| 23.04.2020 | 17:00:00 | 12,9 |
| 23.04.2020 | 18:00:00 | 12,9 |
| 23.04.2020 | 19:00:00 | 12,7 |
| 23.04.2020 | 20:00:00 | 12,7 |
| 23.04.2020 | 21:00:00 | 12,6 |
| 23.04.2020 | 22:00:00 | 12,5 |
| 23.04.2020 | 23:00:00 | 12,4 |
| 24.04.2020 | 00:00:00 | 12,4 |
| 24.04.2020 | 01:00:00 | 12,3 |
| 24.04.2020 | 02:00:00 | 12,3 |
| 24.04.2020 | 03:00:00 | 12,3 |
| 24.04.2020 | 04:00:00 | 12,4 |
| 24.04.2020 | 05:00:00 | 12,5 |
| 24.04.2020 | 06:00:00 | 12,6 |
| 24.04.2020 | 07:00:00 | 12,7 |
| 24.04.2020 | 08:00:00 | 12,9 |
| 24.04.2020 | 09:00:00 | 13   |
| 24.04.2020 | 10:00:00 | 13,2 |
| 24.04.2020 | 11:00:00 | 13,4 |
| 24.04.2020 | 12:00:00 | 13,5 |
| 24.04.2020 | 13:00:00 | 13,5 |
| 24.04.2020 | 14:00:00 | 13,4 |
| 24.04.2020 | 15:00:00 | 13,4 |
| 24.04.2020 | 16:00:00 | 13,4 |
| 24.04.2020 | 17:00:00 | 13,3 |
| 24.04.2020 | 18:00:00 | 13,2 |

|            |          |      |
|------------|----------|------|
| 24.04.2020 | 19:00:00 | 13   |
| 24.04.2020 | 20:00:00 | 12,9 |
| 24.04.2020 | 21:00:00 | 12,8 |
| 24.04.2020 | 22:00:00 | 12,7 |
| 24.04.2020 | 23:00:00 | 12,7 |
| 25.04.2020 | 00:00:00 | 12,7 |
| 25.04.2020 | 01:00:00 | 12,7 |
| 25.04.2020 | 02:00:00 | 12,7 |
| 25.04.2020 | 03:00:00 | 12,8 |
| 25.04.2020 | 04:00:00 | 12,9 |
| 25.04.2020 | 05:00:00 | 13   |
| 25.04.2020 | 06:00:00 | 13,1 |
| 25.04.2020 | 07:00:00 | 13,2 |
| 25.04.2020 | 08:00:00 | 13,3 |
| 25.04.2020 | 09:00:00 | 13,4 |
| 25.04.2020 | 10:00:00 | 13,4 |
| 25.04.2020 | 11:00:00 | 13,5 |
| 25.04.2020 | 12:00:00 | 13,6 |
| 25.04.2020 | 13:00:00 | 13,5 |
| 25.04.2020 | 14:00:00 | 13,4 |
| 25.04.2020 | 15:00:00 | 13,3 |
| 25.04.2020 | 16:00:00 | 13,3 |
| 25.04.2020 | 17:00:00 | 13,3 |
| 25.04.2020 | 18:00:00 | 13,2 |
| 25.04.2020 | 19:00:00 | 13,1 |
| 25.04.2020 | 20:00:00 | 13   |
| 25.04.2020 | 21:00:00 | 12,9 |
| 25.04.2020 | 22:00:00 | 12,9 |
| 25.04.2020 | 23:00:00 | 12,9 |
| 26.04.2020 | 00:00:00 | 12,9 |
| 26.04.2020 | 01:00:00 | 13   |
| 26.04.2020 | 02:00:00 | 13   |
| 26.04.2020 | 03:00:00 | 13   |
| 26.04.2020 | 04:00:00 | 13,1 |
| 26.04.2020 | 05:00:00 | 13,2 |
| 26.04.2020 | 06:00:00 | 13,2 |
| 26.04.2020 | 07:00:00 | 13,3 |
| 26.04.2020 | 08:00:00 | 13,4 |
| 26.04.2020 | 09:00:00 | 13,6 |
| 26.04.2020 | 10:00:00 | 13,8 |
| 26.04.2020 | 11:00:00 | 13,9 |
| 26.04.2020 | 12:00:00 | 14   |
| 26.04.2020 | 13:00:00 | 14   |
| 26.04.2020 | 14:00:00 | 13,9 |
| 26.04.2020 | 15:00:00 | 13,8 |
| 26.04.2020 | 16:00:00 | 13,8 |

|            |          |      |
|------------|----------|------|
| 26.04.2020 | 17:00:00 | 13,7 |
| 26.04.2020 | 18:00:00 | 13,6 |
| 26.04.2020 | 19:00:00 | 13,5 |
| 26.04.2020 | 20:00:00 | 13,4 |
| 26.04.2020 | 21:00:00 | 13,3 |
| 26.04.2020 | 22:00:00 | 13,2 |
| 26.04.2020 | 23:00:00 | 13,2 |
| 27.04.2020 | 00:00:00 | 13,1 |
| 27.04.2020 | 01:00:00 | 13,1 |
| 27.04.2020 | 02:00:00 | 13,1 |
| 27.04.2020 | 03:00:00 | 13,1 |
| 27.04.2020 | 04:00:00 | 13,2 |
| 27.04.2020 | 05:00:00 | 13,3 |
| 27.04.2020 | 06:00:00 | 13,3 |
| 27.04.2020 | 07:00:00 | 13,4 |
| 27.04.2020 | 08:00:00 | 13,5 |
| 27.04.2020 | 09:00:00 | 13,6 |
| 27.04.2020 | 10:00:00 | 13,7 |
| 27.04.2020 | 11:00:00 | 13,8 |
| 27.04.2020 | 12:00:00 | 13,9 |
| 27.04.2020 | 13:00:00 | 13,8 |
| 27.04.2020 | 14:00:00 | 13,8 |
| 27.04.2020 | 15:00:00 | 13,7 |
| 27.04.2020 | 16:00:00 | 13,7 |
| 27.04.2020 | 17:00:00 | 13,7 |
| 27.04.2020 | 18:00:00 | 13,6 |
| 27.04.2020 | 19:00:00 | 13,5 |
| 27.04.2020 | 20:00:00 | 13,4 |
| 27.04.2020 | 21:00:00 | 13,4 |
| 27.04.2020 | 22:00:00 | 13,4 |
| 27.04.2020 | 23:00:00 | 13,3 |
| 28.04.2020 | 00:00:00 | 13,3 |
| 28.04.2020 | 01:00:00 | 13,3 |
| 28.04.2020 | 02:00:00 | 13,3 |
| 28.04.2020 | 03:00:00 | 13,3 |
| 28.04.2020 | 04:00:00 | 13,4 |
| 28.04.2020 | 05:00:00 | 13,4 |
| 28.04.2020 | 06:00:00 | 13,6 |
| 28.04.2020 | 07:00:00 | 13,6 |
| 28.04.2020 | 08:00:00 | 13,8 |
| 28.04.2020 | 09:00:00 | 13,9 |
| 28.04.2020 | 10:00:00 | 14,1 |
| 28.04.2020 | 11:00:00 | 14,2 |
| 28.04.2020 | 12:00:00 | 14,3 |
| 28.04.2020 | 13:00:00 | 14,4 |
| 28.04.2020 | 14:00:00 | 14,2 |

|            |          |      |
|------------|----------|------|
| 28.04.2020 | 15:00:00 | 14,2 |
| 28.04.2020 | 16:00:00 | 14,2 |
| 28.04.2020 | 17:00:00 | 14,1 |
| 28.04.2020 | 18:00:00 | 14   |
| 28.04.2020 | 19:00:00 | 13,9 |
| 28.04.2020 | 20:00:00 | 13,8 |
| 28.04.2020 | 21:00:00 | 13,7 |
| 28.04.2020 | 22:00:00 | 13,6 |
| 28.04.2020 | 23:00:00 | 13,5 |
| 29.04.2020 | 00:00:00 | 13,5 |
| 29.04.2020 | 01:00:00 | 13,5 |
| 29.04.2020 | 02:00:00 | 13,5 |
| 29.04.2020 | 03:00:00 | 13,5 |
| 29.04.2020 | 04:00:00 | 13,6 |
| 29.04.2020 | 05:00:00 | 13,7 |
| 29.04.2020 | 06:00:00 | 13,8 |
| 29.04.2020 | 07:00:00 | 13,8 |
| 29.04.2020 | 08:00:00 | 13,9 |
| 29.04.2020 | 09:00:00 | 14   |
| 29.04.2020 | 10:00:00 | 14,2 |
| 29.04.2020 | 11:00:00 | 14,2 |
| 29.04.2020 | 12:00:00 | 14,3 |
| 29.04.2020 | 13:00:00 | 14,3 |
| 29.04.2020 | 14:00:00 | 14,2 |
| 29.04.2020 | 15:00:00 | 14,3 |
| 29.04.2020 | 16:00:00 | 14,2 |
| 29.04.2020 | 17:00:00 | 14,1 |
| 29.04.2020 | 18:00:00 | 14   |
| 29.04.2020 | 19:00:00 | 14   |
| 29.04.2020 | 20:00:00 | 13,9 |
| 29.04.2020 | 21:00:00 | 13,8 |
| 29.04.2020 | 22:00:00 | 13,8 |
| 29.04.2020 | 23:00:00 | 13,8 |
| 30.04.2020 | 00:00:00 | 13,7 |
| 30.04.2020 | 01:00:00 | 13,7 |
| 30.04.2020 | 02:00:00 | 13,8 |
| 30.04.2020 | 03:00:00 | 13,8 |
| 30.04.2020 | 04:00:00 | 13,8 |
| 30.04.2020 | 05:00:00 | 13,9 |
| 30.04.2020 | 06:00:00 | 13,9 |
| 30.04.2020 | 07:00:00 | 14   |
| 30.04.2020 | 08:00:00 | 14,1 |
| 30.04.2020 | 09:00:00 | 14,3 |
| 30.04.2020 | 10:00:00 | 14,4 |
| 30.04.2020 | 11:00:00 | 14,4 |
| 30.04.2020 | 12:00:00 | 14,5 |

|            |          |      |
|------------|----------|------|
| 30.04.2020 | 13:00:00 | 14,5 |
| 30.04.2020 | 14:00:00 | 14,4 |
| 30.04.2020 | 15:00:00 | 14,4 |
| 30.04.2020 | 16:00:00 | 14,4 |
| 30.04.2020 | 17:00:00 | 14,3 |
| 30.04.2020 | 18:00:00 | 14,3 |
| 30.04.2020 | 19:00:00 | 14,2 |
| 30.04.2020 | 20:00:00 | 14,1 |
| 30.04.2020 | 21:00:00 | 14   |
| 30.04.2020 | 22:00:00 | 14   |
| 30.04.2020 | 23:00:00 | 13,9 |
| 01.05.2020 | 00:00:00 | 13,9 |
| 01.05.2020 | 01:00:00 | 13,9 |
| 01.05.2020 | 02:00:00 | 13,9 |
| 01.05.2020 | 03:00:00 | 14   |
| 01.05.2020 | 04:00:00 | 14   |
| 01.05.2020 | 05:00:00 | 14   |
| 01.05.2020 | 06:00:00 | 14   |
| 01.05.2020 | 07:00:00 | 14   |
| 01.05.2020 | 08:00:00 | 14   |
| 01.05.2020 | 09:00:00 | 14,1 |
| 01.05.2020 | 10:00:00 | 14,2 |
| 01.05.2020 | 11:00:00 | 14,2 |
| 01.05.2020 | 12:00:00 | 14,3 |
| 01.05.2020 | 13:00:00 | 14,5 |
| 01.05.2020 | 14:00:00 | 14,4 |
| 01.05.2020 | 15:00:00 | 14,4 |
| 01.05.2020 | 16:00:00 | 14,4 |
| 01.05.2020 | 17:00:00 | 14,3 |
| 01.05.2020 | 18:00:00 | 14,3 |
| 01.05.2020 | 19:00:00 | 14,3 |
| 01.05.2020 | 20:00:00 | 14,3 |
| 01.05.2020 | 21:00:00 | 14,2 |
| 01.05.2020 | 22:00:00 | 14,2 |
| 01.05.2020 | 23:00:00 | 14,2 |
| 02.05.2020 | 00:00:00 | 14,2 |
| 02.05.2020 | 01:00:00 | 14,3 |
| 02.05.2020 | 02:00:00 | 14,3 |
| 02.05.2020 | 03:00:00 | 14,3 |
| 02.05.2020 | 04:00:00 | 14,3 |
| 02.05.2020 | 05:00:00 | 14,2 |
| 02.05.2020 | 06:00:00 | 14,3 |
| 02.05.2020 | 07:00:00 | 14,3 |
| 02.05.2020 | 08:00:00 | 14,3 |
| 02.05.2020 | 09:00:00 | 14,5 |
| 02.05.2020 | 10:00:00 | 14,5 |

|            |          |      |
|------------|----------|------|
| 02.05.2020 | 11:00:00 | 14,7 |
| 02.05.2020 | 12:00:00 | 14,7 |
| 02.05.2020 | 13:00:00 | 14,7 |
| 02.05.2020 | 14:00:00 | 14,6 |
| 02.05.2020 | 15:00:00 | 14,6 |
| 02.05.2020 | 16:00:00 | 14,6 |
| 02.05.2020 | 17:00:00 | 14,5 |
| 02.05.2020 | 18:00:00 | 14,4 |
| 02.05.2020 | 19:00:00 | 14,3 |
| 02.05.2020 | 20:00:00 | 14,2 |
| 02.05.2020 | 21:00:00 | 14,1 |
| 02.05.2020 | 22:00:00 | 14,1 |
| 02.05.2020 | 23:00:00 | 14,1 |
| 03.05.2020 | 00:00:00 | 14,1 |
| 03.05.2020 | 01:00:00 | 14,1 |
| 03.05.2020 | 02:00:00 | 14,1 |
| 03.05.2020 | 03:00:00 | 14,1 |
| 03.05.2020 | 04:00:00 | 14,1 |
| 03.05.2020 | 05:00:00 | 14,1 |
| 03.05.2020 | 06:00:00 | 14,1 |
| 03.05.2020 | 07:00:00 | 14   |
| 03.05.2020 | 08:00:00 | 14,1 |
| 03.05.2020 | 09:00:00 | 14,2 |
| 03.05.2020 | 10:00:00 | 14,2 |
| 03.05.2020 | 11:00:00 | 14,2 |
| 03.05.2020 | 12:00:00 | 14,3 |
| 03.05.2020 | 13:00:00 | 14,2 |
| 03.05.2020 | 14:00:00 | 14,2 |
| 03.05.2020 | 15:00:00 | 14,2 |
| 03.05.2020 | 16:00:00 | 14,2 |
| 03.05.2020 | 17:00:00 | 14,1 |
| 03.05.2020 | 18:00:00 | 14   |
| 03.05.2020 | 19:00:00 | 14   |
| 03.05.2020 | 20:00:00 | 14   |
| 03.05.2020 | 21:00:00 | 14   |
| 03.05.2020 | 22:00:00 | 14   |
| 03.05.2020 | 23:00:00 | 14   |
| 04.05.2020 | 00:00:00 | 14   |
| 04.05.2020 | 01:00:00 | 14   |
| 04.05.2020 | 02:00:00 | 14   |
| 04.05.2020 | 03:00:00 | 14   |
| 04.05.2020 | 04:00:00 | 14   |
| 04.05.2020 | 05:00:00 | 14   |
| 04.05.2020 | 06:00:00 | 14   |
| 04.05.2020 | 07:00:00 | 14,1 |
| 04.05.2020 | 08:00:00 | 14,2 |



|            |          |      |
|------------|----------|------|
| 04.05.2020 | 09:00:00 | 14,2 |
| 04.05.2020 | 10:00:00 | 14,4 |
| 04.05.2020 | 11:00:00 | 14,4 |
| 04.05.2020 | 12:00:00 | 14,5 |
| 04.05.2020 | 13:00:00 | 14,6 |
| 04.05.2020 | 14:00:00 | 14,5 |
| 04.05.2020 | 15:00:00 | 14,5 |
| 04.05.2020 | 16:00:00 | 14,5 |
| 04.05.2020 | 17:00:00 | 14,4 |
| 04.05.2020 | 18:00:00 | 14,4 |
| 04.05.2020 | 19:00:00 | 14,3 |
| 04.05.2020 | 20:00:00 | 14,3 |
| 04.05.2020 | 21:00:00 | 14,2 |
| 04.05.2020 | 22:00:00 | 14,2 |
| 04.05.2020 | 23:00:00 | 14,2 |
| 05.05.2020 | 00:00:00 | 14,2 |
| 05.05.2020 | 01:00:00 | 14,2 |
| 05.05.2020 | 02:00:00 | 14,2 |
| 05.05.2020 | 03:00:00 | 14,2 |
| 05.05.2020 | 04:00:00 | 14,2 |
| 05.05.2020 | 05:00:00 | 14,2 |
| 05.05.2020 | 06:00:00 | 14,1 |
| 05.05.2020 | 07:00:00 | 14,1 |
| 05.05.2020 | 08:00:00 | 14,2 |
| 05.05.2020 | 09:00:00 | 14,2 |
| 05.05.2020 | 10:00:00 | 14,2 |
| 05.05.2020 | 11:00:00 | 14,3 |
| 05.05.2020 | 12:00:00 | 14,3 |
| 05.05.2020 | 13:00:00 | 14,5 |
| 05.05.2020 | 14:00:00 | 14,3 |
| 05.05.2020 | 15:00:00 | 14,3 |
| 05.05.2020 | 16:00:00 | 14,3 |
| 05.05.2020 | 17:00:00 | 14,3 |
| 05.05.2020 | 18:00:00 | 14,2 |
| 05.05.2020 | 19:00:00 | 14   |
| 05.05.2020 | 20:00:00 | 13,9 |
| 05.05.2020 | 21:00:00 | 13,7 |
| 05.05.2020 | 22:00:00 | 13,7 |
| 05.05.2020 | 23:00:00 | 13,6 |
| 06.05.2020 | 00:00:00 | 13,7 |
| 06.05.2020 | 01:00:00 | 13,6 |
| 06.05.2020 | 02:00:00 | 13,6 |
| 06.05.2020 | 03:00:00 | 13,6 |
| 06.05.2020 | 04:00:00 | 13,5 |
| 06.05.2020 | 05:00:00 | 13,5 |
| 06.05.2020 | 06:00:00 | 13,6 |

|            |          |      |
|------------|----------|------|
| 06.05.2020 | 07:00:00 | 13,7 |
| 06.05.2020 | 08:00:00 | 13,8 |
| 06.05.2020 | 09:00:00 | 13,9 |
| 06.05.2020 | 10:00:00 | 13,9 |
| 06.05.2020 | 11:00:00 | 14   |
| 06.05.2020 | 12:00:00 | 14   |
| 06.05.2020 | 13:00:00 | 13,9 |
| 06.05.2020 | 14:00:00 | 13,9 |
| 06.05.2020 | 15:00:00 | 13,8 |
| 06.05.2020 | 16:00:00 | 13,9 |
| 06.05.2020 | 17:00:00 | 13,8 |
| 06.05.2020 | 18:00:00 | 13,8 |
| 06.05.2020 | 19:00:00 | 13,6 |
| 06.05.2020 | 20:00:00 | 13,6 |
| 06.05.2020 | 21:00:00 | 13,5 |
| 06.05.2020 | 22:00:00 | 13,4 |
| 06.05.2020 | 23:00:00 | 13,4 |
| 07.05.2020 | 00:00:00 | 13,4 |
| 07.05.2020 | 01:00:00 | 13,3 |
| 07.05.2020 | 02:00:00 | 13,3 |
| 07.05.2020 | 03:00:00 | 13,4 |
| 07.05.2020 | 04:00:00 | 13,4 |
| 07.05.2020 | 05:00:00 | 13,4 |
| 07.05.2020 | 06:00:00 | 13,4 |
| 07.05.2020 | 07:00:00 | 13,5 |
| 07.05.2020 | 08:00:00 | 13,5 |
| 07.05.2020 | 09:00:00 | 13,6 |
| 07.05.2020 | 10:00:00 | 13,7 |
| 07.05.2020 | 11:00:00 | 13,8 |
| 07.05.2020 | 12:00:00 | 13,8 |
| 07.05.2020 | 13:00:00 | 13,9 |
| 07.05.2020 | 14:00:00 | 13,8 |
| 07.05.2020 | 15:00:00 | 13,8 |
| 07.05.2020 | 16:00:00 | 13,8 |
| 07.05.2020 | 17:00:00 | 13,8 |
| 07.05.2020 | 18:00:00 | 13,8 |
| 07.05.2020 | 19:00:00 | 13,7 |
| 07.05.2020 | 20:00:00 | 13,7 |
| 07.05.2020 | 21:00:00 | 13,7 |
| 07.05.2020 | 22:00:00 | 13,6 |
| 07.05.2020 | 23:00:00 | 13,6 |
| 08.05.2020 | 00:00:00 | 13,6 |
| 08.05.2020 | 01:00:00 | 13,7 |
| 08.05.2020 | 02:00:00 | 13,8 |
| 08.05.2020 | 03:00:00 | 13,8 |
| 08.05.2020 | 04:00:00 | 13,7 |

|            |          |      |
|------------|----------|------|
| 08.05.2020 | 05:00:00 | 13,7 |
| 08.05.2020 | 06:00:00 | 13,7 |
| 08.05.2020 | 07:00:00 | 13,8 |
| 08.05.2020 | 08:00:00 | 13,9 |
| 08.05.2020 | 09:00:00 | 14,1 |
| 08.05.2020 | 10:00:00 | 14,2 |
| 08.05.2020 | 11:00:00 | 14,3 |
| 08.05.2020 | 12:00:00 | 14,4 |
| 08.05.2020 | 13:00:00 | 14,4 |
| 08.05.2020 | 14:00:00 | 14,3 |
| 08.05.2020 | 15:00:00 | 14,3 |
| 08.05.2020 | 16:00:00 | 14,3 |
| 08.05.2020 | 17:00:00 | 14,2 |
| 08.05.2020 | 18:00:00 | 14,1 |
| 08.05.2020 | 19:00:00 | 14   |
| 08.05.2020 | 20:00:00 | 13,9 |
| 08.05.2020 | 21:00:00 | 13,8 |
| 08.05.2020 | 22:00:00 | 13,7 |
| 08.05.2020 | 23:00:00 | 13,7 |
| 09.05.2020 | 00:00:00 | 13,6 |
| 09.05.2020 | 01:00:00 | 13,7 |
| 09.05.2020 | 02:00:00 | 13,7 |
| 09.05.2020 | 03:00:00 | 13,7 |
| 09.05.2020 | 04:00:00 | 13,7 |
| 09.05.2020 | 05:00:00 | 13,8 |
| 09.05.2020 | 06:00:00 | 13,9 |
| 09.05.2020 | 07:00:00 | 14   |
| 09.05.2020 | 08:00:00 | 14,1 |
| 09.05.2020 | 09:00:00 | 14,3 |
| 09.05.2020 | 10:00:00 | 14,4 |
| 09.05.2020 | 11:00:00 | 14,6 |
| 09.05.2020 | 12:00:00 | 14,7 |
| 09.05.2020 | 13:00:00 | 14,7 |
| 09.05.2020 | 14:00:00 | 14,7 |
| 09.05.2020 | 15:00:00 | 14,6 |
| 09.05.2020 | 16:00:00 | 14,6 |
| 09.05.2020 | 17:00:00 | 14,5 |
| 09.05.2020 | 18:00:00 | 14,4 |
| 09.05.2020 | 19:00:00 | 14,4 |
| 09.05.2020 | 20:00:00 | 14,2 |
| 09.05.2020 | 21:00:00 | 14,2 |
| 09.05.2020 | 22:00:00 | 14,1 |
| 09.05.2020 | 23:00:00 | 14   |
| 10.05.2020 | 00:00:00 | 14   |
| 10.05.2020 | 01:00:00 | 14   |
| 10.05.2020 | 02:00:00 | 14   |

|            |          |      |
|------------|----------|------|
| 10.05.2020 | 03:00:00 | 14,1 |
| 10.05.2020 | 04:00:00 | 14,1 |
| 10.05.2020 | 05:00:00 | 14,1 |
| 10.05.2020 | 06:00:00 | 14,2 |
| 10.05.2020 | 07:00:00 | 14,3 |
| 10.05.2020 | 08:00:00 | 14,4 |
| 10.05.2020 | 09:00:00 | 14,6 |
| 10.05.2020 | 10:00:00 | 14,7 |
| 10.05.2020 | 11:00:00 | 14,8 |
| 10.05.2020 | 12:00:00 | 14,8 |
| 10.05.2020 | 13:00:00 | 14,8 |
| 10.05.2020 | 14:00:00 | 14,7 |
| 10.05.2020 | 15:00:00 | 14,6 |
| 10.05.2020 | 16:00:00 | 14,7 |
| 10.05.2020 | 17:00:00 | 14,6 |
| 10.05.2020 | 18:00:00 | 14,5 |
| 10.05.2020 | 19:00:00 | 14,5 |
| 10.05.2020 | 20:00:00 | 14,4 |
| 10.05.2020 | 21:00:00 | 14,4 |
| 10.05.2020 | 22:00:00 | 14,4 |
| 10.05.2020 | 23:00:00 | 14,3 |
| 11.05.2020 | 00:00:00 | 14,3 |
| 11.05.2020 | 01:00:00 | 14,3 |
| 11.05.2020 | 02:00:00 | 14,3 |
| 11.05.2020 | 03:00:00 | 14,3 |
| 11.05.2020 | 04:00:00 | 14,4 |
| 11.05.2020 | 05:00:00 | 14,5 |
| 11.05.2020 | 06:00:00 | 14,5 |
| 11.05.2020 | 07:00:00 | 14,6 |
| 11.05.2020 | 08:00:00 | 14,7 |
| 11.05.2020 | 09:00:00 | 14,8 |
| 11.05.2020 | 10:00:00 | 14,9 |
| 11.05.2020 | 11:00:00 | 14,8 |
| 11.05.2020 | 12:00:00 | 14,7 |
| 11.05.2020 | 13:00:00 | 14,7 |
| 11.05.2020 | 14:00:00 | 14,6 |
| 11.05.2020 | 15:00:00 | 14,6 |
| 11.05.2020 | 16:00:00 | 14,6 |
| 11.05.2020 | 17:00:00 | 14,6 |
| 11.05.2020 | 18:00:00 | 14,5 |
| 11.05.2020 | 19:00:00 | 14,5 |
| 11.05.2020 | 20:00:00 | 14,5 |
| 11.05.2020 | 21:00:00 | 14,3 |
| 11.05.2020 | 22:00:00 | 14,2 |
| 11.05.2020 | 23:00:00 | 14,1 |
| 12.05.2020 | 00:00:00 | 14,1 |

|            |          |      |
|------------|----------|------|
| 12.05.2020 | 01:00:00 | 14,1 |
| 12.05.2020 | 02:00:00 | 14,1 |
| 12.05.2020 | 03:00:00 | 14,1 |
| 12.05.2020 | 04:00:00 | 14,1 |
| 12.05.2020 | 05:00:00 | 14,1 |
| 12.05.2020 | 06:00:00 | 14   |
| 12.05.2020 | 07:00:00 | 14,1 |
| 12.05.2020 | 08:00:00 | 14   |
| 12.05.2020 | 09:00:00 | 14,1 |
| 12.05.2020 | 10:00:00 | 14,2 |
| 12.05.2020 | 11:00:00 | 14,3 |
| 12.05.2020 | 12:00:00 | 14,4 |
| 12.05.2020 | 13:00:00 | 14,5 |
| 12.05.2020 | 14:00:00 | 14,4 |
| 12.05.2020 | 15:00:00 | 14,4 |
| 12.05.2020 | 16:00:00 | 14,4 |
| 12.05.2020 | 17:00:00 | 14,3 |
| 12.05.2020 | 18:00:00 | 14,3 |
| 12.05.2020 | 19:00:00 | 14,2 |
| 12.05.2020 | 20:00:00 | 14,1 |
| 12.05.2020 | 21:00:00 | 14,1 |
| 12.05.2020 | 22:00:00 | 14   |
| 12.05.2020 | 23:00:00 | 14   |
| 13.05.2020 | 00:00:00 | 14   |
| 13.05.2020 | 01:00:00 | 14   |
| 13.05.2020 | 02:00:00 | 14   |
| 13.05.2020 | 03:00:00 | 14   |
| 13.05.2020 | 04:00:00 | 14   |
| 13.05.2020 | 05:00:00 | 14   |
| 13.05.2020 | 06:00:00 | 13,9 |
| 13.05.2020 | 07:00:00 | 13,9 |
| 13.05.2020 | 08:00:00 | 14   |
| 13.05.2020 | 09:00:00 | 13,9 |
| 13.05.2020 | 10:00:00 | 14,1 |
| 13.05.2020 | 11:00:00 | 14,2 |
| 13.05.2020 | 12:00:00 | 14,4 |
| 13.05.2020 | 13:00:00 | 14,3 |
| 13.05.2020 | 14:00:00 | 14,3 |
| 13.05.2020 | 15:00:00 | 14,2 |
| 13.05.2020 | 16:00:00 | 14,2 |
| 13.05.2020 | 17:00:00 | 14,1 |
| 13.05.2020 | 18:00:00 | 14,1 |
| 13.05.2020 | 19:00:00 | 14,1 |
| 13.05.2020 | 20:00:00 | 14,1 |
| 13.05.2020 | 21:00:00 | 14,1 |
| 13.05.2020 | 22:00:00 | 14,2 |

|            |          |      |
|------------|----------|------|
| 13.05.2020 | 23:00:00 | 14,2 |
| 14.05.2020 | 00:00:00 | 14,2 |
| 14.05.2020 | 01:00:00 | 14,2 |
| 14.05.2020 | 02:00:00 | 14,2 |
| 14.05.2020 | 03:00:00 | 14,2 |
| 14.05.2020 | 04:00:00 | 14,2 |
| 14.05.2020 | 05:00:00 | 14,1 |
| 14.05.2020 | 06:00:00 | 14,1 |
| 14.05.2020 | 07:00:00 | 14   |
| 14.05.2020 | 08:00:00 | 14,1 |
| 14.05.2020 | 09:00:00 | 14   |
| 14.05.2020 | 10:00:00 | 14,1 |
| 14.05.2020 | 11:00:00 | 14,2 |
| 14.05.2020 | 12:00:00 | 14,3 |
| 14.05.2020 | 13:00:00 | 14,2 |
| 14.05.2020 | 14:00:00 | 14,2 |
| 14.05.2020 | 15:00:00 | 14,2 |
| 14.05.2020 | 16:00:00 | 14,1 |
| 14.05.2020 | 17:00:00 | 14,1 |
| 14.05.2020 | 18:00:00 | 14,1 |
| 14.05.2020 | 19:00:00 | 14,1 |
| 14.05.2020 | 20:00:00 | 14,1 |
| 14.05.2020 | 21:00:00 | 14   |
| 14.05.2020 | 22:00:00 | 14,1 |
| 14.05.2020 | 23:00:00 | 14,1 |
| 15.05.2020 | 00:00:00 | 14,1 |
| 15.05.2020 | 01:00:00 | 14,1 |
| 15.05.2020 | 02:00:00 | 14,1 |
| 15.05.2020 | 03:00:00 | 14   |
| 15.05.2020 | 04:00:00 | 14,1 |
| 15.05.2020 | 05:00:00 | 14,1 |
| 15.05.2020 | 06:00:00 | 14,1 |
| 15.05.2020 | 07:00:00 | 14,1 |
| 15.05.2020 | 08:00:00 | 14,1 |
| 15.05.2020 | 09:00:00 | 14   |
| 15.05.2020 | 10:00:00 | 14   |
| 15.05.2020 | 11:00:00 | 14   |
| 15.05.2020 | 12:00:00 | 14   |
| 15.05.2020 | 13:00:00 | 13,9 |
| 15.05.2020 | 14:00:00 | 13,9 |
| 15.05.2020 | 15:00:00 | 13,9 |
| 15.05.2020 | 16:00:00 | 13,9 |
| 15.05.2020 | 17:00:00 | 13,9 |
| 15.05.2020 | 18:00:00 | 13,9 |
| 15.05.2020 | 19:00:00 | 13,9 |
| 15.05.2020 | 20:00:00 | 13,9 |

|            |          |      |
|------------|----------|------|
| 15.05.2020 | 21:00:00 | 13,8 |
| 15.05.2020 | 22:00:00 | 13,8 |
| 15.05.2020 | 23:00:00 | 13,8 |
| 16.05.2020 | 00:00:00 | 13,7 |
| 16.05.2020 | 01:00:00 | 13,7 |
| 16.05.2020 | 02:00:00 | 13,7 |
| 16.05.2020 | 03:00:00 | 13,7 |
| 16.05.2020 | 04:00:00 | 13,7 |
| 16.05.2020 | 05:00:00 | 13,7 |
| 16.05.2020 | 06:00:00 | 13,7 |
| 16.05.2020 | 07:00:00 | 13,8 |
| 16.05.2020 | 08:00:00 | 13,9 |
| 16.05.2020 | 09:00:00 | 14,1 |
| 16.05.2020 | 10:00:00 | 14,1 |
| 16.05.2020 | 11:00:00 | 14,2 |
| 16.05.2020 | 12:00:00 | 14,2 |
| 16.05.2020 | 13:00:00 | 14,3 |
| 16.05.2020 | 14:00:00 | 14,1 |
| 16.05.2020 | 15:00:00 | 14,1 |
| 16.05.2020 | 16:00:00 | 14,1 |
| 16.05.2020 | 17:00:00 | 14   |
| 16.05.2020 | 18:00:00 | 14   |
| 16.05.2020 | 19:00:00 | 13,9 |
| 16.05.2020 | 20:00:00 | 13,8 |
| 16.05.2020 | 21:00:00 | 13,8 |
| 16.05.2020 | 22:00:00 | 13,7 |
| 16.05.2020 | 23:00:00 | 13,7 |
| 17.05.2020 | 00:00:00 | 13,7 |
| 17.05.2020 | 01:00:00 | 13,7 |
| 17.05.2020 | 02:00:00 | 13,7 |
| 17.05.2020 | 03:00:00 | 13,7 |
| 17.05.2020 | 04:00:00 | 13,7 |
| 17.05.2020 | 05:00:00 | 13,7 |
| 17.05.2020 | 06:00:00 | 13,7 |
| 17.05.2020 | 07:00:00 | 13,7 |
| 17.05.2020 | 08:00:00 | 13,8 |
| 17.05.2020 | 09:00:00 | 13,8 |
| 17.05.2020 | 10:00:00 | 14   |
| 17.05.2020 | 11:00:00 | 14   |
| 17.05.2020 | 12:00:00 | 14,2 |
| 17.05.2020 | 13:00:00 | 14,3 |
| 17.05.2020 | 14:00:00 | 14,2 |
| 17.05.2020 | 15:00:00 | 14,2 |
| 17.05.2020 | 16:00:00 | 14,2 |
| 17.05.2020 | 17:00:00 | 14,2 |
| 17.05.2020 | 18:00:00 | 14,2 |

|            |          |      |
|------------|----------|------|
| 17.05.2020 | 19:00:00 | 14,1 |
| 17.05.2020 | 20:00:00 | 14,1 |
| 17.05.2020 | 21:00:00 | 14   |
| 17.05.2020 | 22:00:00 | 14   |
| 17.05.2020 | 23:00:00 | 14   |
| 18.05.2020 | 00:00:00 | 13,9 |
| 18.05.2020 | 01:00:00 | 13,9 |
| 18.05.2020 | 02:00:00 | 13,9 |
| 18.05.2020 | 03:00:00 | 13,8 |
| 18.05.2020 | 04:00:00 | 13,8 |
| 18.05.2020 | 05:00:00 | 13,7 |
| 18.05.2020 | 06:00:00 | 13,8 |
| 18.05.2020 | 07:00:00 | 13,9 |
| 18.05.2020 | 08:00:00 | 13,9 |
| 18.05.2020 | 09:00:00 | 14,2 |
| 18.05.2020 | 10:00:00 | 14,3 |
| 18.05.2020 | 11:00:00 | 14,3 |
| 18.05.2020 | 12:00:00 | 14,5 |
| 18.05.2020 | 13:00:00 | 14,6 |
| 18.05.2020 | 14:00:00 | 14,5 |
| 18.05.2020 | 15:00:00 | 14,5 |
| 18.05.2020 | 16:00:00 | 14,5 |
| 18.05.2020 | 17:00:00 | 14,4 |
| 18.05.2020 | 18:00:00 | 14,4 |
| 18.05.2020 | 19:00:00 | 14,3 |
| 18.05.2020 | 20:00:00 | 14,2 |
| 18.05.2020 | 21:00:00 | 14,2 |
| 18.05.2020 | 22:00:00 | 14,1 |
| 18.05.2020 | 23:00:00 | 14,1 |
| 19.05.2020 | 00:00:00 | 14,1 |
| 19.05.2020 | 01:00:00 | 14,1 |
| 19.05.2020 | 02:00:00 | 14,1 |
| 19.05.2020 | 03:00:00 | 14,1 |
| 19.05.2020 | 04:00:00 | 14,1 |
| 19.05.2020 | 05:00:00 | 14,1 |
| 19.05.2020 | 06:00:00 | 14,2 |
| 19.05.2020 | 07:00:00 | 14,3 |
| 19.05.2020 | 08:00:00 | 14,4 |
| 19.05.2020 | 09:00:00 | 14,5 |
| 19.05.2020 | 10:00:00 | 14,7 |
| 19.05.2020 | 11:00:00 | 14,9 |
| 19.05.2020 | 12:00:00 | 15   |
| 19.05.2020 | 13:00:00 | 14,9 |
| 19.05.2020 | 14:00:00 | 14,9 |
| 19.05.2020 | 15:00:00 | 14,9 |
| 19.05.2020 | 16:00:00 | 14,8 |



|            |          |      |
|------------|----------|------|
| 19.05.2020 | 17:00:00 | 14,7 |
| 19.05.2020 | 18:00:00 | 14,6 |
| 19.05.2020 | 19:00:00 | 14,5 |
| 19.05.2020 | 20:00:00 | 14,4 |
| 19.05.2020 | 21:00:00 | 14,3 |
| 19.05.2020 | 22:00:00 | 14,3 |
| 19.05.2020 | 23:00:00 | 14,3 |
| 20.05.2020 | 00:00:00 | 14,2 |
| 20.05.2020 | 01:00:00 | 14,3 |
| 20.05.2020 | 02:00:00 | 14,3 |
| 20.05.2020 | 03:00:00 | 14,4 |
| 20.05.2020 | 04:00:00 | 14,4 |
| 20.05.2020 | 05:00:00 | 14,5 |
| 20.05.2020 | 06:00:00 | 14,5 |
| 20.05.2020 | 07:00:00 | 14,7 |
| 20.05.2020 | 08:00:00 | 14,7 |
| 20.05.2020 | 09:00:00 | 14,9 |
| 20.05.2020 | 10:00:00 | 15   |
| 20.05.2020 | 11:00:00 | 15,1 |
| 20.05.2020 | 12:00:00 | 15,2 |
| 20.05.2020 | 13:00:00 | 15,1 |
| 20.05.2020 | 14:00:00 | 14,9 |
| 20.05.2020 | 15:00:00 | 14,8 |
| 20.05.2020 | 16:00:00 | 14,8 |
| 20.05.2020 | 17:00:00 | 14,7 |
| 20.05.2020 | 18:00:00 | 14,6 |
| 20.05.2020 | 19:00:00 | 14,6 |
| 20.05.2020 | 20:00:00 | 14,5 |
| 20.05.2020 | 21:00:00 | 14,4 |
| 20.05.2020 | 22:00:00 | 14,4 |
| 20.05.2020 | 23:00:00 | 14,3 |
| 21.05.2020 | 00:00:00 | 14,2 |
| 21.05.2020 | 01:00:00 | 14,2 |
| 21.05.2020 | 02:00:00 | 14,3 |
| 21.05.2020 | 03:00:00 | 14,3 |
| 21.05.2020 | 04:00:00 | 14,3 |
| 21.05.2020 | 05:00:00 | 14,3 |
| 21.05.2020 | 06:00:00 | 14,4 |
| 21.05.2020 | 07:00:00 | 14,4 |
| 21.05.2020 | 08:00:00 | 14,6 |
| 21.05.2020 | 09:00:00 | 14,6 |
| 21.05.2020 | 10:00:00 | 14,8 |
| 21.05.2020 | 11:00:00 | 14,8 |
| 21.05.2020 | 12:00:00 | 14,8 |
| 21.05.2020 | 13:00:00 | 14,8 |
| 21.05.2020 | 14:00:00 | 14,7 |

|            |          |      |
|------------|----------|------|
| 21.05.2020 | 15:00:00 | 14,7 |
| 21.05.2020 | 16:00:00 | 14,7 |
| 21.05.2020 | 17:00:00 | 14,6 |
| 21.05.2020 | 18:00:00 | 14,4 |
| 21.05.2020 | 19:00:00 | 14,3 |
| 21.05.2020 | 20:00:00 | 14,3 |
| 21.05.2020 | 21:00:00 | 14,2 |
| 21.05.2020 | 22:00:00 | 14,1 |
| 21.05.2020 | 23:00:00 | 14   |
| 22.05.2020 | 00:00:00 | 14   |
| 22.05.2020 | 01:00:00 | 14   |
| 22.05.2020 | 02:00:00 | 14   |
| 22.05.2020 | 03:00:00 | 14   |
| 22.05.2020 | 04:00:00 | 14   |
| 22.05.2020 | 05:00:00 | 14,1 |
| 22.05.2020 | 06:00:00 | 14,1 |
| 22.05.2020 | 07:00:00 | 14,2 |
| 22.05.2020 | 08:00:00 | 14,4 |
| 22.05.2020 | 09:00:00 | 14,4 |
| 22.05.2020 | 10:00:00 | 14,5 |
| 22.05.2020 | 11:00:00 | 14,6 |
| 22.05.2020 | 12:00:00 | 14,7 |
| 22.05.2020 | 13:00:00 | 14,8 |
| 22.05.2020 | 14:00:00 | 14,7 |
| 22.05.2020 | 15:00:00 | 14,8 |
| 22.05.2020 | 16:00:00 | 14,8 |
| 22.05.2020 | 17:00:00 | 14,7 |
| 22.05.2020 | 18:00:00 | 14,7 |
| 22.05.2020 | 19:00:00 | 14,5 |
| 22.05.2020 | 20:00:00 | 14,5 |
| 22.05.2020 | 21:00:00 | 14,4 |
| 22.05.2020 | 22:00:00 | 14,4 |
| 22.05.2020 | 23:00:00 | 14,4 |
| 23.05.2020 | 00:00:00 | 14,4 |
| 23.05.2020 | 01:00:00 | 14,5 |
| 23.05.2020 | 02:00:00 | 14,5 |
| 23.05.2020 | 03:00:00 | 14,5 |
| 23.05.2020 | 04:00:00 | 14,6 |
| 23.05.2020 | 05:00:00 | 14,6 |
| 23.05.2020 | 06:00:00 | 14,7 |
| 23.05.2020 | 07:00:00 | 14,7 |
| 23.05.2020 | 08:00:00 | 14,7 |
| 23.05.2020 | 09:00:00 | 14,7 |
| 23.05.2020 | 10:00:00 | 14,7 |
| 23.05.2020 | 11:00:00 | 14,9 |
| 23.05.2020 | 12:00:00 | 15,2 |

|            |          |      |
|------------|----------|------|
| 23.05.2020 | 13:00:00 | 15,3 |
| 23.05.2020 | 14:00:00 | 15,2 |
| 23.05.2020 | 15:00:00 | 15,2 |
| 23.05.2020 | 16:00:00 | 15,2 |
| 23.05.2020 | 17:00:00 | 15,1 |
| 23.05.2020 | 18:00:00 | 15   |
| 23.05.2020 | 19:00:00 | 14,9 |
| 23.05.2020 | 20:00:00 | 14,8 |
| 23.05.2020 | 21:00:00 | 14,7 |
| 23.05.2020 | 22:00:00 | 14,7 |
| 23.05.2020 | 23:00:00 | 14,7 |
| 24.05.2020 | 00:00:00 | 14,6 |
| 24.05.2020 | 01:00:00 | 14,6 |
| 24.05.2020 | 02:00:00 | 14,7 |
| 24.05.2020 | 03:00:00 | 14,7 |
| 24.05.2020 | 04:00:00 | 14,7 |
| 24.05.2020 | 05:00:00 | 14,8 |
| 24.05.2020 | 06:00:00 | 14,9 |
| 24.05.2020 | 07:00:00 | 15   |
| 24.05.2020 | 08:00:00 | 15,1 |
| 24.05.2020 | 09:00:00 | 15,2 |
| 24.05.2020 | 10:00:00 | 15,3 |
| 24.05.2020 | 11:00:00 | 15,2 |
| 24.05.2020 | 12:00:00 | 15,2 |
| 24.05.2020 | 13:00:00 | 15,5 |
| 24.05.2020 | 14:00:00 | 15,4 |
| 24.05.2020 | 15:00:00 | 15,4 |
| 24.05.2020 | 16:00:00 | 15,3 |
| 24.05.2020 | 17:00:00 | 15,3 |
| 24.05.2020 | 18:00:00 | 15,2 |
| 24.05.2020 | 19:00:00 | 15,1 |
| 24.05.2020 | 20:00:00 | 15   |
| 24.05.2020 | 21:00:00 | 15   |
| 24.05.2020 | 22:00:00 | 14,9 |
| 24.05.2020 | 23:00:00 | 15   |
| 25.05.2020 | 00:00:00 | 15   |
| 25.05.2020 | 01:00:00 | 15,1 |
| 25.05.2020 | 02:00:00 | 15,2 |
| 25.05.2020 | 03:00:00 | 15,2 |
| 25.05.2020 | 04:00:00 | 15,3 |
| 25.05.2020 | 05:00:00 | 15,3 |
| 25.05.2020 | 06:00:00 | 15,3 |
| 25.05.2020 | 07:00:00 | 15,3 |
| 25.05.2020 | 08:00:00 | 15,3 |
| 25.05.2020 | 09:00:00 | 15,3 |
| 25.05.2020 | 10:00:00 | 15,3 |

|            |          |      |
|------------|----------|------|
| 25.05.2020 | 11:00:00 | 15,6 |
| 25.05.2020 | 12:00:00 | 15,6 |
| 25.05.2020 | 13:00:00 | 15,5 |
| 25.05.2020 | 14:00:00 | 15,5 |
| 25.05.2020 | 15:00:00 | 15,5 |
| 25.05.2020 | 16:00:00 | 15,5 |
| 25.05.2020 | 17:00:00 | 15,4 |
| 25.05.2020 | 18:00:00 | 15,3 |
| 25.05.2020 | 19:00:00 | 15,2 |
| 25.05.2020 | 20:00:00 | 15,2 |
| 25.05.2020 | 21:00:00 | 15,2 |
| 25.05.2020 | 22:00:00 | 15,2 |
| 25.05.2020 | 23:00:00 | 15,2 |
| 26.05.2020 | 00:00:00 | 15,2 |
| 26.05.2020 | 01:00:00 | 15,3 |
| 26.05.2020 | 02:00:00 | 15,3 |
| 26.05.2020 | 03:00:00 | 15,3 |
| 26.05.2020 | 04:00:00 | 15,3 |
| 26.05.2020 | 05:00:00 | 15,2 |
| 26.05.2020 | 06:00:00 | 15,2 |
| 26.05.2020 | 07:00:00 | 15,2 |
| 26.05.2020 | 08:00:00 | 15,2 |
| 26.05.2020 | 09:00:00 | 15,1 |
| 26.05.2020 | 10:00:00 | 15,3 |
| 26.05.2020 | 11:00:00 | 15,4 |
| 26.05.2020 | 12:00:00 | 15,2 |
| 26.05.2020 | 13:00:00 | 15,1 |
| 26.05.2020 | 14:00:00 | 15,1 |
| 26.05.2020 | 15:00:00 | 15,1 |
| 26.05.2020 | 16:00:00 | 15,2 |
| 26.05.2020 | 17:00:00 | 15,2 |
| 26.05.2020 | 18:00:00 | 15,1 |
| 26.05.2020 | 19:00:00 | 15,1 |
| 26.05.2020 | 20:00:00 | 15   |
| 26.05.2020 | 21:00:00 | 15   |
| 26.05.2020 | 22:00:00 | 15   |
| 26.05.2020 | 23:00:00 | 14,9 |
| 27.05.2020 | 00:00:00 | 14,9 |
| 27.05.2020 | 01:00:00 | 14,8 |
| 27.05.2020 | 02:00:00 | 14,8 |
| 27.05.2020 | 03:00:00 | 14,7 |
| 27.05.2020 | 04:00:00 | 14,7 |
| 27.05.2020 | 05:00:00 | 14,7 |
| 27.05.2020 | 06:00:00 | 14,7 |
| 27.05.2020 | 07:00:00 | 14,7 |
| 27.05.2020 | 08:00:00 | 14,8 |

|            |          |      |
|------------|----------|------|
| 27.05.2020 | 09:00:00 | 15   |
| 27.05.2020 | 10:00:00 | 15,2 |
| 27.05.2020 | 11:00:00 | 15,3 |
| 27.05.2020 | 12:00:00 | 15,4 |
| 27.05.2020 | 13:00:00 | 15,6 |
| 27.05.2020 | 14:00:00 | 15,5 |
| 27.05.2020 | 15:00:00 | 15,5 |
| 27.05.2020 | 16:00:00 | 15,5 |
| 27.05.2020 | 17:00:00 | 15,5 |
| 27.05.2020 | 18:00:00 | 15,4 |
| 27.05.2020 | 19:00:00 | 15,3 |
| 27.05.2020 | 20:00:00 | 15,3 |
| 27.05.2020 | 21:00:00 | 15,2 |
| 27.05.2020 | 22:00:00 | 15,1 |
| 27.05.2020 | 23:00:00 | 15   |
| 28.05.2020 | 00:00:00 | 14,9 |
| 28.05.2020 | 01:00:00 | 14,9 |
| 28.05.2020 | 02:00:00 | 14,8 |
| 28.05.2020 | 03:00:00 | 14,8 |
| 28.05.2020 | 04:00:00 | 14,7 |
| 28.05.2020 | 05:00:00 | 14,7 |
| 28.05.2020 | 06:00:00 | 14,6 |
| 28.05.2020 | 07:00:00 | 14,6 |
| 28.05.2020 | 08:00:00 | 14,7 |
| 28.05.2020 | 09:00:00 | 14,7 |
| 28.05.2020 | 10:00:00 | 14,7 |
| 28.05.2020 | 11:00:00 | 14,8 |
| 28.05.2020 | 12:00:00 | 14,8 |
| 28.05.2020 | 13:00:00 | 14,8 |
| 28.05.2020 | 14:00:00 | 14,7 |
| 28.05.2020 | 15:00:00 | 14,7 |
| 28.05.2020 | 16:00:00 | 14,6 |
| 28.05.2020 | 17:00:00 | 14,6 |
| 28.05.2020 | 18:00:00 | 14,5 |
| 28.05.2020 | 19:00:00 | 14,4 |
| 28.05.2020 | 20:00:00 | 14,4 |
| 28.05.2020 | 21:00:00 | 14,4 |
| 28.05.2020 | 22:00:00 | 14,4 |
| 28.05.2020 | 23:00:00 | 14,4 |
| 29.05.2020 | 00:00:00 | 14,3 |
| 29.05.2020 | 01:00:00 | 14,3 |
| 29.05.2020 | 02:00:00 | 14,3 |
| 29.05.2020 | 03:00:00 | 14,2 |
| 29.05.2020 | 04:00:00 | 14,2 |
| 29.05.2020 | 05:00:00 | 14,1 |
| 29.05.2020 | 06:00:00 | 14,1 |

|            |          |      |
|------------|----------|------|
| 29.05.2020 | 07:00:00 | 14,1 |
| 29.05.2020 | 08:00:00 | 14,2 |
| 29.05.2020 | 09:00:00 | 14,3 |
| 29.05.2020 | 10:00:00 | 14,3 |
| 29.05.2020 | 11:00:00 | 14,5 |
| 29.05.2020 | 12:00:00 | 14,3 |
| 29.05.2020 | 13:00:00 | 14,4 |
| 29.05.2020 | 14:00:00 | 14,3 |
| 29.05.2020 | 15:00:00 | 14,3 |
| 29.05.2020 | 16:00:00 | 14,3 |
| 29.05.2020 | 17:00:00 | 14,2 |
| 29.05.2020 | 18:00:00 | 14,2 |
| 29.05.2020 | 19:00:00 | 14,1 |
| 29.05.2020 | 20:00:00 | 14,1 |
| 29.05.2020 | 21:00:00 | 14   |
| 29.05.2020 | 22:00:00 | 14   |
| 29.05.2020 | 23:00:00 | 14   |
| 30.05.2020 | 00:00:00 | 14   |
| 30.05.2020 | 01:00:00 | 14   |
| 30.05.2020 | 02:00:00 | 13,9 |
| 30.05.2020 | 03:00:00 | 13,9 |
| 30.05.2020 | 04:00:00 | 13,9 |
| 30.05.2020 | 05:00:00 | 13,9 |
| 30.05.2020 | 06:00:00 | 13,9 |
| 30.05.2020 | 07:00:00 | 13,9 |
| 30.05.2020 | 08:00:00 | 13,9 |
| 30.05.2020 | 09:00:00 | 13,9 |
| 30.05.2020 | 10:00:00 | 13,9 |
| 30.05.2020 | 11:00:00 | 14,1 |
| 30.05.2020 | 12:00:00 | 14,3 |
| 30.05.2020 | 13:00:00 | 14,5 |
| 30.05.2020 | 14:00:00 | 14,4 |
| 30.05.2020 | 15:00:00 | 14,3 |
| 30.05.2020 | 16:00:00 | 14,3 |
| 30.05.2020 | 17:00:00 | 14,3 |
| 30.05.2020 | 18:00:00 | 14,3 |
| 30.05.2020 | 19:00:00 | 14,2 |
| 30.05.2020 | 20:00:00 | 14,2 |
| 30.05.2020 | 21:00:00 | 14,2 |
| 30.05.2020 | 22:00:00 | 14,1 |
| 30.05.2020 | 23:00:00 | 14,1 |
| 31.05.2020 | 00:00:00 | 14,1 |
| 31.05.2020 | 01:00:00 | 14   |
| 31.05.2020 | 02:00:00 | 14   |
| 31.05.2020 | 03:00:00 | 14   |
| 31.05.2020 | 04:00:00 | 13,9 |

|            |          |      |
|------------|----------|------|
| 31.05.2020 | 05:00:00 | 13,9 |
| 31.05.2020 | 06:00:00 | 13,9 |
| 31.05.2020 | 07:00:00 | 13,9 |
| 31.05.2020 | 08:00:00 | 13,9 |
| 31.05.2020 | 09:00:00 | 13,9 |
| 31.05.2020 | 10:00:00 | 13,9 |
| 31.05.2020 | 11:00:00 | 13,8 |
| 31.05.2020 | 12:00:00 | 13,8 |
| 31.05.2020 | 13:00:00 | 13,7 |
| 31.05.2020 | 14:00:00 | 13,7 |
| 31.05.2020 | 15:00:00 | 13,6 |
| 31.05.2020 | 16:00:00 | 13,6 |
| 31.05.2020 | 17:00:00 | 13,5 |
| 31.05.2020 | 18:00:00 | 13,5 |
| 31.05.2020 | 19:00:00 | 13,5 |
| 31.05.2020 | 20:00:00 | 13,4 |
| 31.05.2020 | 21:00:00 | 13,4 |
| 31.05.2020 | 22:00:00 | 13,4 |
| 31.05.2020 | 23:00:00 | 13,4 |
| 01.04.2021 | 00:00:00 | 8,4  |
| 01.04.2021 | 01:00:00 | 8,4  |
| 01.04.2021 | 02:00:00 | 8,6  |
| 01.04.2021 | 03:00:00 | 8,6  |
| 01.04.2021 | 04:00:00 | 8,7  |
| 01.04.2021 | 05:00:00 | 8,7  |
| 01.04.2021 | 06:00:00 | 8,7  |
| 01.04.2021 | 07:00:00 | 8,7  |
| 01.04.2021 | 08:00:00 | 8,7  |
| 01.04.2021 | 09:00:00 | 8,8  |
| 01.04.2021 | 10:00:00 | 8,9  |
| 01.04.2021 | 11:00:00 | 9    |
| 01.04.2021 | 12:00:00 | 9    |
| 01.04.2021 | 13:00:00 | 9,1  |
| 01.04.2021 | 14:00:00 | 9,2  |
| 01.04.2021 | 15:00:00 | 9,2  |
| 01.04.2021 | 16:00:00 | 9,2  |
| 01.04.2021 | 17:00:00 | 9,2  |
| 01.04.2021 | 18:00:00 | 9,2  |
| 01.04.2021 | 19:00:00 | 9,1  |
| 01.04.2021 | 20:00:00 | 9,1  |
| 01.04.2021 | 21:00:00 | 9,1  |
| 01.04.2021 | 22:00:00 | 9,2  |
| 01.04.2021 | 23:00:00 | 9,2  |
| 02.04.2021 | 00:00:00 | 9,3  |
| 02.04.2021 | 01:00:00 | 9,3  |
| 02.04.2021 | 02:00:00 | 9,4  |

|            |          |     |
|------------|----------|-----|
| 02.04.2021 | 03:00:00 | 9,4 |
| 02.04.2021 | 04:00:00 | 9,4 |
| 02.04.2021 | 05:00:00 | 9,4 |
| 02.04.2021 | 06:00:00 | 9,4 |
| 02.04.2021 | 07:00:00 | 9,3 |
| 02.04.2021 | 08:00:00 | 9,3 |
| 02.04.2021 | 09:00:00 | 9,3 |
| 02.04.2021 | 10:00:00 | 9,4 |
| 02.04.2021 | 11:00:00 | 9,4 |
| 02.04.2021 | 12:00:00 | 9,5 |
| 02.04.2021 | 13:00:00 | 9,5 |
| 02.04.2021 | 14:00:00 | 9,5 |
| 02.04.2021 | 15:00:00 | 9,6 |
| 02.04.2021 | 16:00:00 | 9,6 |
| 02.04.2021 | 17:00:00 | 9,5 |
| 02.04.2021 | 18:00:00 | 9,5 |
| 02.04.2021 | 19:00:00 | 9,6 |
| 02.04.2021 | 20:00:00 | 9,5 |
| 02.04.2021 | 21:00:00 | 9,5 |
| 02.04.2021 | 22:00:00 | 9,6 |
| 02.04.2021 | 23:00:00 | 9,6 |
| 03.04.2021 | 00:00:00 | 9,6 |
| 03.04.2021 | 01:00:00 | 9,6 |
| 03.04.2021 | 02:00:00 | 9,5 |
| 03.04.2021 | 03:00:00 | 9,5 |
| 03.04.2021 | 04:00:00 | 9,4 |
| 03.04.2021 | 05:00:00 | 9,4 |
| 03.04.2021 | 06:00:00 | 9,4 |
| 03.04.2021 | 07:00:00 | 9,4 |
| 03.04.2021 | 08:00:00 | 9,4 |
| 03.04.2021 | 09:00:00 | 9,4 |
| 03.04.2021 | 10:00:00 | 9,4 |
| 03.04.2021 | 11:00:00 | 9,5 |
| 03.04.2021 | 12:00:00 | 9,5 |
| 03.04.2021 | 13:00:00 | 9,5 |
| 03.04.2021 | 14:00:00 | 9,5 |
| 03.04.2021 | 15:00:00 | 9,5 |
| 03.04.2021 | 16:00:00 | 9,5 |
| 03.04.2021 | 17:00:00 | 9,5 |
| 03.04.2021 | 18:00:00 | 9,5 |
| 03.04.2021 | 19:00:00 | 9,5 |
| 03.04.2021 | 20:00:00 | 9,5 |
| 03.04.2021 | 21:00:00 | 9,4 |
| 03.04.2021 | 22:00:00 | 9,4 |
| 03.04.2021 | 23:00:00 | 9,4 |
| 04.04.2021 | 00:00:00 | 9,5 |



|            |          |     |
|------------|----------|-----|
| 04.04.2021 | 01:00:00 | 9,5 |
| 04.04.2021 | 02:00:00 | 9,4 |
| 04.04.2021 | 03:00:00 | 9,4 |
| 04.04.2021 | 04:00:00 | 9,4 |
| 04.04.2021 | 05:00:00 | 9,3 |
| 04.04.2021 | 06:00:00 | 9,3 |
| 04.04.2021 | 07:00:00 | 9,4 |
| 04.04.2021 | 08:00:00 | 9,4 |
| 04.04.2021 | 09:00:00 | 9,4 |
| 04.04.2021 | 10:00:00 | 9,5 |
| 04.04.2021 | 11:00:00 | 9,5 |
| 04.04.2021 | 12:00:00 | 9,7 |
| 04.04.2021 | 13:00:00 | 9,6 |
| 04.04.2021 | 14:00:00 | 9,7 |
| 04.04.2021 | 15:00:00 | 9,6 |
| 04.04.2021 | 16:00:00 | 9,6 |
| 04.04.2021 | 17:00:00 | 9,6 |
| 04.04.2021 | 18:00:00 | 9,6 |
| 04.04.2021 | 19:00:00 | 9,6 |
| 04.04.2021 | 20:00:00 | 9,5 |
| 04.04.2021 | 21:00:00 | 9,5 |
| 04.04.2021 | 22:00:00 | 9,5 |
| 04.04.2021 | 23:00:00 | 9,5 |
| 05.04.2021 | 00:00:00 | 9,5 |
| 05.04.2021 | 01:00:00 | 9,4 |
| 05.04.2021 | 02:00:00 | 9,3 |
| 05.04.2021 | 03:00:00 | 9,3 |
| 05.04.2021 | 04:00:00 | 9,3 |
| 05.04.2021 | 05:00:00 | 9,4 |
| 05.04.2021 | 06:00:00 | 9,4 |
| 05.04.2021 | 07:00:00 | 9,4 |
| 05.04.2021 | 08:00:00 | 9,4 |
| 05.04.2021 | 09:00:00 | 9,5 |
| 05.04.2021 | 10:00:00 | 9,6 |
| 05.04.2021 | 11:00:00 | 9,7 |
| 05.04.2021 | 12:00:00 | 9,9 |
| 05.04.2021 | 13:00:00 | 9,9 |
| 05.04.2021 | 14:00:00 | 10  |
| 05.04.2021 | 15:00:00 | 10  |
| 05.04.2021 | 16:00:00 | 10  |
| 05.04.2021 | 17:00:00 | 9,9 |
| 05.04.2021 | 18:00:00 | 9,8 |
| 05.04.2021 | 19:00:00 | 9,8 |
| 05.04.2021 | 20:00:00 | 9,7 |
| 05.04.2021 | 21:00:00 | 9,6 |
| 05.04.2021 | 22:00:00 | 9,6 |

|            |          |     |
|------------|----------|-----|
| 05.04.2021 | 23:00:00 | 9,5 |
| 06.04.2021 | 00:00:00 | 9,5 |
| 06.04.2021 | 01:00:00 | 9,5 |
| 06.04.2021 | 02:00:00 | 9,5 |
| 06.04.2021 | 03:00:00 | 9,5 |
| 06.04.2021 | 04:00:00 | 9,4 |
| 06.04.2021 | 05:00:00 | 9,4 |
| 06.04.2021 | 06:00:00 | 9,4 |
| 06.04.2021 | 07:00:00 | 9,3 |
| 06.04.2021 | 08:00:00 | 9,4 |
| 06.04.2021 | 09:00:00 | 9,5 |
| 06.04.2021 | 10:00:00 | 9,5 |
| 06.04.2021 | 11:00:00 | 9,6 |
| 06.04.2021 | 12:00:00 | 9,5 |
| 06.04.2021 | 13:00:00 | 9,5 |
| 06.04.2021 | 14:00:00 | 9,4 |
| 06.04.2021 | 15:00:00 | 9,3 |
| 06.04.2021 | 16:00:00 | 9,4 |
| 06.04.2021 | 17:00:00 | 9,3 |
| 06.04.2021 | 18:00:00 | 9,2 |
| 06.04.2021 | 19:00:00 | 9,2 |
| 06.04.2021 | 20:00:00 | 9,1 |
| 06.04.2021 | 21:00:00 | 9,1 |
| 06.04.2021 | 22:00:00 | 9,1 |
| 06.04.2021 | 23:00:00 | 8,9 |
| 07.04.2021 | 00:00:00 | 9   |
| 07.04.2021 | 01:00:00 | 8,8 |
| 07.04.2021 | 02:00:00 | 8,8 |
| 07.04.2021 | 03:00:00 | 8,8 |
| 07.04.2021 | 04:00:00 | 8,8 |
| 07.04.2021 | 05:00:00 | 8,8 |
| 07.04.2021 | 06:00:00 | 8,8 |
| 07.04.2021 | 07:00:00 | 9,1 |
| 07.04.2021 | 08:00:00 | 9,2 |
| 07.04.2021 | 09:00:00 | 9,3 |
| 07.04.2021 | 10:00:00 | 9,4 |
| 07.04.2021 | 11:00:00 | 9,4 |
| 07.04.2021 | 12:00:00 | 9,4 |
| 07.04.2021 | 13:00:00 | 9,5 |
| 07.04.2021 | 14:00:00 | 9,5 |
| 07.04.2021 | 15:00:00 | 9,4 |
| 07.04.2021 | 16:00:00 | 9,3 |
| 07.04.2021 | 17:00:00 | 8,9 |
| 07.04.2021 | 18:00:00 | 9,1 |
| 07.04.2021 | 19:00:00 | 9   |
| 07.04.2021 | 20:00:00 | 9   |

|            |          |     |
|------------|----------|-----|
| 07.04.2021 | 21:00:00 | 8,9 |
| 07.04.2021 | 22:00:00 | 8,8 |
| 07.04.2021 | 23:00:00 | 8,8 |
| 08.04.2021 | 00:00:00 | 8,7 |
| 08.04.2021 | 01:00:00 | 8,7 |
| 08.04.2021 | 02:00:00 | 8,7 |
| 08.04.2021 | 03:00:00 | 8,8 |
| 08.04.2021 | 04:00:00 | 8,7 |
| 08.04.2021 | 05:00:00 | 8,8 |
| 08.04.2021 | 06:00:00 | 8,7 |
| 08.04.2021 | 07:00:00 | 8,7 |
| 08.04.2021 | 08:00:00 | 8,9 |
| 08.04.2021 | 09:00:00 | 8,9 |
| 08.04.2021 | 10:00:00 | 8,9 |
| 08.04.2021 | 11:00:00 | 9,1 |
| 08.04.2021 | 12:00:00 | 9,2 |
| 08.04.2021 | 13:00:00 | 9,1 |
| 08.04.2021 | 14:00:00 | 9,1 |
| 08.04.2021 | 15:00:00 | 9,2 |
| 08.04.2021 | 16:00:00 | 9,1 |
| 08.04.2021 | 17:00:00 | 9,1 |
| 08.04.2021 | 18:00:00 | 8,9 |
| 08.04.2021 | 19:00:00 | 8,8 |
| 08.04.2021 | 20:00:00 | 8,7 |
| 08.04.2021 | 21:00:00 | 8,7 |
| 08.04.2021 | 22:00:00 | 8,7 |
| 08.04.2021 | 23:00:00 | 8,7 |
| 09.04.2021 | 00:00:00 | 8,6 |
| 09.04.2021 | 01:00:00 | 8,5 |
| 09.04.2021 | 02:00:00 | 8,6 |
| 09.04.2021 | 03:00:00 | 8,4 |
| 09.04.2021 | 04:00:00 | 8,4 |
| 09.04.2021 | 05:00:00 | 8,6 |
| 09.04.2021 | 06:00:00 | 8,6 |
| 09.04.2021 | 07:00:00 | 8,6 |
| 09.04.2021 | 08:00:00 | 8,7 |
| 09.04.2021 | 09:00:00 | 8,8 |
| 09.04.2021 | 10:00:00 | 8,9 |
| 09.04.2021 | 11:00:00 | 9,1 |
| 09.04.2021 | 12:00:00 | 9,4 |
| 09.04.2021 | 13:00:00 | 9,3 |
| 09.04.2021 | 14:00:00 | 9,3 |
| 09.04.2021 | 15:00:00 | 9,3 |
| 09.04.2021 | 16:00:00 | 9,3 |
| 09.04.2021 | 17:00:00 | 9,3 |
| 09.04.2021 | 18:00:00 | 9,2 |

|            |          |     |
|------------|----------|-----|
| 09.04.2021 | 19:00:00 | 9,1 |
| 09.04.2021 | 20:00:00 | 9   |
| 09.04.2021 | 21:00:00 | 8,9 |
| 09.04.2021 | 22:00:00 | 8,8 |
| 09.04.2021 | 23:00:00 | 8,8 |
| 10.04.2021 | 00:00:00 | 8,7 |
| 10.04.2021 | 01:00:00 | 8,7 |
| 10.04.2021 | 02:00:00 | 8,6 |
| 10.04.2021 | 03:00:00 | 8,6 |
| 10.04.2021 | 04:00:00 | 8,6 |
| 10.04.2021 | 05:00:00 | 8,6 |
| 10.04.2021 | 06:00:00 | 8,6 |
| 10.04.2021 | 07:00:00 | 8,8 |
| 10.04.2021 | 08:00:00 | 8,9 |
| 10.04.2021 | 09:00:00 | 9,1 |
| 10.04.2021 | 10:00:00 | 9,2 |
| 10.04.2021 | 11:00:00 | 9,4 |
| 10.04.2021 | 12:00:00 | 9,4 |
| 10.04.2021 | 13:00:00 | 9,5 |
| 10.04.2021 | 14:00:00 | 9,5 |
| 10.04.2021 | 15:00:00 | 9,5 |
| 10.04.2021 | 16:00:00 | 9,5 |
| 10.04.2021 | 17:00:00 | 9,5 |
| 10.04.2021 | 18:00:00 | 9,4 |
| 10.04.2021 | 19:00:00 | 9,3 |
| 10.04.2021 | 20:00:00 | 9,2 |
| 10.04.2021 | 21:00:00 | 9,1 |
| 10.04.2021 | 22:00:00 | 9   |
| 10.04.2021 | 23:00:00 | 8,9 |
| 11.04.2021 | 00:00:00 | 8,9 |
| 11.04.2021 | 01:00:00 | 8,8 |
| 11.04.2021 | 02:00:00 | 8,8 |
| 11.04.2021 | 03:00:00 | 8,8 |
| 11.04.2021 | 04:00:00 | 8,8 |
| 11.04.2021 | 05:00:00 | 8,9 |
| 11.04.2021 | 06:00:00 | 8,9 |
| 11.04.2021 | 07:00:00 | 9   |
| 11.04.2021 | 08:00:00 | 9,1 |
| 11.04.2021 | 09:00:00 | 9,3 |
| 11.04.2021 | 10:00:00 | 9,4 |
| 11.04.2021 | 11:00:00 | 9,5 |
| 11.04.2021 | 12:00:00 | 9,6 |
| 11.04.2021 | 13:00:00 | 9,8 |
| 11.04.2021 | 14:00:00 | 9,8 |
| 11.04.2021 | 15:00:00 | 9,8 |
| 11.04.2021 | 16:00:00 | 9,8 |

|            |          |     |
|------------|----------|-----|
| 11.04.2021 | 17:00:00 | 9,7 |
| 11.04.2021 | 18:00:00 | 9,6 |
| 11.04.2021 | 19:00:00 | 9,5 |
| 11.04.2021 | 20:00:00 | 9,4 |
| 11.04.2021 | 21:00:00 | 9,3 |
| 11.04.2021 | 22:00:00 | 9,2 |
| 11.04.2021 | 23:00:00 | 9,1 |
| 12.04.2021 | 00:00:00 | 9,1 |
| 12.04.2021 | 01:00:00 | 9   |
| 12.04.2021 | 02:00:00 | 9   |
| 12.04.2021 | 03:00:00 | 9   |
| 12.04.2021 | 04:00:00 | 9   |
| 12.04.2021 | 05:00:00 | 9   |
| 12.04.2021 | 06:00:00 | 9,2 |
| 12.04.2021 | 07:00:00 | 9,2 |
| 12.04.2021 | 08:00:00 | 9,4 |
| 12.04.2021 | 09:00:00 | 9,5 |
| 12.04.2021 | 10:00:00 | 9,8 |
| 12.04.2021 | 11:00:00 | 9,8 |
| 12.04.2021 | 12:00:00 | 9,9 |
| 12.04.2021 | 13:00:00 | 10  |
| 12.04.2021 | 14:00:00 | 10  |
| 12.04.2021 | 15:00:00 | 9,9 |
| 12.04.2021 | 16:00:00 | 9,7 |
| 12.04.2021 | 17:00:00 | 9,5 |
| 12.04.2021 | 18:00:00 | 9,3 |
| 12.04.2021 | 19:00:00 | 9,2 |
| 12.04.2021 | 20:00:00 | 9,1 |
| 12.04.2021 | 21:00:00 | 9   |
| 12.04.2021 | 22:00:00 | 9   |
| 12.04.2021 | 23:00:00 | 9   |
| 13.04.2021 | 00:00:00 | 9   |
| 13.04.2021 | 01:00:00 | 9   |
| 13.04.2021 | 02:00:00 | 9   |
| 13.04.2021 | 03:00:00 | 9   |
| 13.04.2021 | 04:00:00 | 9   |
| 13.04.2021 | 05:00:00 | 9,1 |
| 13.04.2021 | 06:00:00 | 9,1 |
| 13.04.2021 | 07:00:00 | 9,1 |
| 13.04.2021 | 08:00:00 | 9,1 |
| 13.04.2021 | 09:00:00 | 9,1 |
| 13.04.2021 | 10:00:00 | 9,1 |
| 13.04.2021 | 11:00:00 | 9,1 |
| 13.04.2021 | 12:00:00 | 9,1 |
| 13.04.2021 | 13:00:00 | 9   |
| 13.04.2021 | 14:00:00 | 9   |

|            |          |     |
|------------|----------|-----|
| 13.04.2021 | 15:00:00 | 8,9 |
| 13.04.2021 | 16:00:00 | 8,8 |
| 13.04.2021 | 17:00:00 | 8,7 |
| 13.04.2021 | 18:00:00 | 8,7 |
| 13.04.2021 | 19:00:00 | 8,7 |
| 13.04.2021 | 20:00:00 | 8,6 |
| 13.04.2021 | 21:00:00 | 8,6 |
| 13.04.2021 | 22:00:00 | 8,6 |
| 13.04.2021 | 23:00:00 | 8,6 |
| 14.04.2021 | 00:00:00 | 8,6 |
| 14.04.2021 | 01:00:00 | 8,6 |
| 14.04.2021 | 02:00:00 | 8,5 |
| 14.04.2021 | 03:00:00 | 8,5 |
| 14.04.2021 | 04:00:00 | 8,4 |
| 14.04.2021 | 05:00:00 | 8,4 |
| 14.04.2021 | 06:00:00 | 8,4 |
| 14.04.2021 | 07:00:00 | 8,4 |
| 14.04.2021 | 08:00:00 | 8,4 |
| 14.04.2021 | 09:00:00 | 8,5 |
| 14.04.2021 | 10:00:00 | 8,5 |
| 14.04.2021 | 11:00:00 | 8,6 |
| 14.04.2021 | 12:00:00 | 8,7 |
| 14.04.2021 | 13:00:00 | 8,7 |
| 14.04.2021 | 14:00:00 | 8,6 |
| 14.04.2021 | 15:00:00 | 8,6 |
| 14.04.2021 | 16:00:00 | 8,6 |
| 14.04.2021 | 17:00:00 | 8,5 |
| 14.04.2021 | 18:00:00 | 8,5 |
| 14.04.2021 | 19:00:00 | 8,4 |
| 14.04.2021 | 20:00:00 | 8,4 |
| 14.04.2021 | 21:00:00 | 8,3 |
| 14.04.2021 | 22:00:00 | 8,3 |
| 14.04.2021 | 23:00:00 | 8,2 |
| 15.04.2021 | 00:00:00 | 8,1 |
| 15.04.2021 | 01:00:00 | 8,2 |
| 15.04.2021 | 02:00:00 | 8,1 |
| 15.04.2021 | 03:00:00 | 8,1 |
| 15.04.2021 | 04:00:00 | 8,1 |
| 15.04.2021 | 05:00:00 | 8,1 |
| 15.04.2021 | 06:00:00 | 8,1 |
| 15.04.2021 | 07:00:00 | 8,1 |
| 15.04.2021 | 08:00:00 | 8,2 |
| 15.04.2021 | 09:00:00 | 8,3 |
| 15.04.2021 | 10:00:00 | 8,3 |
| 15.04.2021 | 11:00:00 | 8,3 |
| 15.04.2021 | 12:00:00 | 8,3 |

|            |          |     |
|------------|----------|-----|
| 15.04.2021 | 13:00:00 | 8,3 |
| 15.04.2021 | 14:00:00 | 8,3 |
| 15.04.2021 | 15:00:00 | 8,3 |
| 15.04.2021 | 16:00:00 | 8,2 |
| 15.04.2021 | 17:00:00 | 8,2 |
| 15.04.2021 | 18:00:00 | 8,1 |
| 15.04.2021 | 19:00:00 | 8   |
| 15.04.2021 | 20:00:00 | 8   |
| 15.04.2021 | 21:00:00 | 8   |
| 15.04.2021 | 22:00:00 | 7,9 |
| 15.04.2021 | 23:00:00 | 7,8 |
| 16.04.2021 | 00:00:00 | 7,8 |
| 16.04.2021 | 01:00:00 | 7,8 |
| 16.04.2021 | 02:00:00 | 7,8 |
| 16.04.2021 | 03:00:00 | 7,8 |
| 16.04.2021 | 04:00:00 | 7,8 |
| 16.04.2021 | 05:00:00 | 7,8 |
| 16.04.2021 | 06:00:00 | 7,9 |
| 16.04.2021 | 07:00:00 | 7,9 |
| 16.04.2021 | 08:00:00 | 8   |
| 16.04.2021 | 09:00:00 | 8   |
| 16.04.2021 | 10:00:00 | 8,1 |
| 16.04.2021 | 11:00:00 | 8,1 |
| 16.04.2021 | 12:00:00 | 8,2 |
| 16.04.2021 | 13:00:00 | 8,2 |
| 16.04.2021 | 14:00:00 | 8,1 |
| 16.04.2021 | 15:00:00 | 8,1 |
| 16.04.2021 | 16:00:00 | 8,1 |
| 16.04.2021 | 17:00:00 | 8   |
| 16.04.2021 | 18:00:00 | 8   |
| 16.04.2021 | 19:00:00 | 7,9 |
| 16.04.2021 | 20:00:00 | 7,9 |
| 16.04.2021 | 21:00:00 | 7,8 |
| 16.04.2021 | 22:00:00 | 7,8 |
| 16.04.2021 | 23:00:00 | 7,8 |
| 17.04.2021 | 00:00:00 | 7,9 |
| 17.04.2021 | 01:00:00 | 7,8 |
| 17.04.2021 | 02:00:00 | 7,9 |
| 17.04.2021 | 03:00:00 | 7,9 |
| 17.04.2021 | 04:00:00 | 7,9 |
| 17.04.2021 | 05:00:00 | 8   |
| 17.04.2021 | 06:00:00 | 8   |
| 17.04.2021 | 07:00:00 | 8   |
| 17.04.2021 | 08:00:00 | 8,1 |
| 17.04.2021 | 09:00:00 | 8,2 |
| 17.04.2021 | 10:00:00 | 8,3 |

|            |          |     |
|------------|----------|-----|
| 17.04.2021 | 11:00:00 | 8,4 |
| 17.04.2021 | 12:00:00 | 8,4 |
| 17.04.2021 | 13:00:00 | 8,5 |
| 17.04.2021 | 14:00:00 | 8,4 |
| 17.04.2021 | 15:00:00 | 8,4 |
| 17.04.2021 | 16:00:00 | 8,4 |
| 17.04.2021 | 17:00:00 | 8,4 |
| 17.04.2021 | 18:00:00 | 8,3 |
| 17.04.2021 | 19:00:00 | 8,2 |
| 17.04.2021 | 20:00:00 | 8,2 |
| 17.04.2021 | 21:00:00 | 8,1 |
| 17.04.2021 | 22:00:00 | 8,1 |
| 17.04.2021 | 23:00:00 | 8,1 |
| 18.04.2021 | 00:00:00 | 8   |
| 18.04.2021 | 01:00:00 | 8   |
| 18.04.2021 | 02:00:00 | 7,9 |
| 18.04.2021 | 03:00:00 | 7,9 |
| 18.04.2021 | 04:00:00 | 7,9 |
| 18.04.2021 | 05:00:00 | 8   |
| 18.04.2021 | 06:00:00 | 8   |
| 18.04.2021 | 07:00:00 | 8   |
| 18.04.2021 | 08:00:00 | 8   |
| 18.04.2021 | 09:00:00 | 8,1 |
| 18.04.2021 | 10:00:00 | 8,1 |
| 18.04.2021 | 11:00:00 | 8,2 |
| 18.04.2021 | 12:00:00 | 8,3 |
| 18.04.2021 | 13:00:00 | 8,4 |
| 18.04.2021 | 14:00:00 | 8,5 |
| 18.04.2021 | 15:00:00 | 8,5 |
| 18.04.2021 | 16:00:00 | 8,6 |
| 18.04.2021 | 17:00:00 | 8,5 |
| 18.04.2021 | 18:00:00 | 8,4 |
| 18.04.2021 | 19:00:00 | 8,4 |
| 18.04.2021 | 20:00:00 | 8,3 |
| 18.04.2021 | 21:00:00 | 8,3 |
| 18.04.2021 | 22:00:00 | 8,2 |
| 18.04.2021 | 23:00:00 | 8,2 |
| 19.04.2021 | 00:00:00 | 8,2 |
| 19.04.2021 | 01:00:00 | 8,2 |
| 19.04.2021 | 02:00:00 | 8,2 |
| 19.04.2021 | 03:00:00 | 8,2 |
| 19.04.2021 | 04:00:00 | 8,1 |
| 19.04.2021 | 05:00:00 | 8,1 |
| 19.04.2021 | 06:00:00 | 8,2 |
| 19.04.2021 | 07:00:00 | 8,2 |
| 19.04.2021 | 08:00:00 | 8,3 |



|            |          |     |
|------------|----------|-----|
| 19.04.2021 | 09:00:00 | 8,3 |
| 19.04.2021 | 10:00:00 | 8,4 |
| 19.04.2021 | 11:00:00 | 8,5 |
| 19.04.2021 | 12:00:00 | 8,6 |
| 19.04.2021 | 13:00:00 | 8,7 |
| 19.04.2021 | 14:00:00 | 8,7 |
| 19.04.2021 | 15:00:00 | 8,7 |
| 19.04.2021 | 16:00:00 | 8,7 |
| 19.04.2021 | 17:00:00 | 8,6 |
| 19.04.2021 | 18:00:00 | 8,6 |
| 19.04.2021 | 19:00:00 | 8,5 |
| 19.04.2021 | 20:00:00 | 8,4 |
| 19.04.2021 | 21:00:00 | 8,4 |
| 19.04.2021 | 22:00:00 | 8,3 |
| 19.04.2021 | 23:00:00 | 8,3 |
| 20.04.2021 | 00:00:00 | 8,3 |
| 20.04.2021 | 01:00:00 | 8,2 |
| 20.04.2021 | 02:00:00 | 8,2 |
| 20.04.2021 | 03:00:00 | 8,2 |
| 20.04.2021 | 04:00:00 | 8,2 |
| 20.04.2021 | 05:00:00 | 8,2 |
| 20.04.2021 | 06:00:00 | 8,2 |
| 20.04.2021 | 07:00:00 | 8,3 |
| 20.04.2021 | 08:00:00 | 8,3 |
| 20.04.2021 | 09:00:00 | 8,4 |
| 20.04.2021 | 10:00:00 | 8,5 |
| 20.04.2021 | 11:00:00 | 8,6 |
| 20.04.2021 | 12:00:00 | 8,8 |
| 20.04.2021 | 13:00:00 | 8,8 |
| 20.04.2021 | 14:00:00 | 8,8 |
| 20.04.2021 | 15:00:00 | 8,9 |
| 20.04.2021 | 16:00:00 | 8,9 |
| 20.04.2021 | 17:00:00 | 8,9 |
| 20.04.2021 | 18:00:00 | 8,8 |
| 20.04.2021 | 19:00:00 | 8,8 |
| 20.04.2021 | 20:00:00 | 8,7 |
| 20.04.2021 | 21:00:00 | 8,6 |
| 20.04.2021 | 22:00:00 | 8,6 |
| 20.04.2021 | 23:00:00 | 8,5 |
| 21.04.2021 | 00:00:00 | 8,5 |
| 21.04.2021 | 01:00:00 | 8,5 |
| 21.04.2021 | 02:00:00 | 8,5 |
| 21.04.2021 | 03:00:00 | 8,5 |
| 21.04.2021 | 04:00:00 | 8,5 |
| 21.04.2021 | 05:00:00 | 8,6 |
| 21.04.2021 | 06:00:00 | 8,6 |

|            |          |     |
|------------|----------|-----|
| 21.04.2021 | 07:00:00 | 8,7 |
| 21.04.2021 | 08:00:00 | 8,8 |
| 21.04.2021 | 09:00:00 | 9,1 |
| 21.04.2021 | 10:00:00 | 9,2 |
| 21.04.2021 | 11:00:00 | 9,5 |
| 21.04.2021 | 12:00:00 | 9,4 |
| 21.04.2021 | 13:00:00 | 9,7 |
| 21.04.2021 | 14:00:00 | 9,5 |
| 21.04.2021 | 15:00:00 | 9,5 |
| 21.04.2021 | 16:00:00 | 9,4 |
| 21.04.2021 | 17:00:00 | 9,3 |
| 21.04.2021 | 18:00:00 | 9,3 |
| 21.04.2021 | 19:00:00 | 9,2 |
| 21.04.2021 | 20:00:00 | 9,1 |
| 21.04.2021 | 21:00:00 | 9   |
| 21.04.2021 | 22:00:00 | 9   |
| 21.04.2021 | 23:00:00 | 8,9 |
| 22.04.2021 | 00:00:00 | 8,9 |
| 22.04.2021 | 01:00:00 | 8,9 |
| 22.04.2021 | 02:00:00 | 8,8 |
| 22.04.2021 | 03:00:00 | 8,8 |
| 22.04.2021 | 04:00:00 | 8,8 |
| 22.04.2021 | 05:00:00 | 8,9 |
| 22.04.2021 | 06:00:00 | 9   |
| 22.04.2021 | 07:00:00 | 9   |
| 22.04.2021 | 08:00:00 | 9,2 |
| 22.04.2021 | 09:00:00 | 9,2 |
| 22.04.2021 | 10:00:00 | 9,3 |
| 22.04.2021 | 11:00:00 | 9,3 |
| 22.04.2021 | 12:00:00 | 9,2 |
| 22.04.2021 | 13:00:00 | 9,3 |
| 22.04.2021 | 14:00:00 | 9,2 |
| 22.04.2021 | 15:00:00 | 9,2 |
| 22.04.2021 | 16:00:00 | 9,1 |
| 22.04.2021 | 17:00:00 | 9,1 |
| 22.04.2021 | 18:00:00 | 9,1 |
| 22.04.2021 | 19:00:00 | 9   |
| 22.04.2021 | 20:00:00 | 8,9 |
| 22.04.2021 | 21:00:00 | 8,8 |
| 22.04.2021 | 22:00:00 | 8,7 |
| 22.04.2021 | 23:00:00 | 8,7 |
| 23.04.2021 | 00:00:00 | 8,7 |
| 23.04.2021 | 01:00:00 | 8,7 |
| 23.04.2021 | 02:00:00 | 8,6 |
| 23.04.2021 | 03:00:00 | 8,6 |
| 23.04.2021 | 04:00:00 | 8,6 |

|            |          |      |
|------------|----------|------|
| 23.04.2021 | 05:00:00 | 8,7  |
| 23.04.2021 | 06:00:00 | 8,7  |
| 23.04.2021 | 07:00:00 | 8,8  |
| 23.04.2021 | 08:00:00 | 9    |
| 23.04.2021 | 09:00:00 | 9,2  |
| 23.04.2021 | 10:00:00 | 9,4  |
| 23.04.2021 | 11:00:00 | 9,5  |
| 23.04.2021 | 12:00:00 | 9,6  |
| 23.04.2021 | 13:00:00 | 9,7  |
| 23.04.2021 | 14:00:00 | 9,6  |
| 23.04.2021 | 15:00:00 | 9,5  |
| 23.04.2021 | 16:00:00 | 9,5  |
| 23.04.2021 | 17:00:00 | 9,4  |
| 23.04.2021 | 18:00:00 | 9,4  |
| 23.04.2021 | 19:00:00 | 9,4  |
| 23.04.2021 | 20:00:00 | 9,3  |
| 23.04.2021 | 21:00:00 | 9,2  |
| 23.04.2021 | 22:00:00 | 9,2  |
| 23.04.2021 | 23:00:00 | 9,1  |
| 24.04.2021 | 00:00:00 | 9,1  |
| 24.04.2021 | 01:00:00 | 9,1  |
| 24.04.2021 | 02:00:00 | 9,1  |
| 24.04.2021 | 03:00:00 | 9,1  |
| 24.04.2021 | 04:00:00 | 9,1  |
| 24.04.2021 | 05:00:00 | 9,1  |
| 24.04.2021 | 06:00:00 | 9,2  |
| 24.04.2021 | 07:00:00 | 9,3  |
| 24.04.2021 | 08:00:00 | 9,5  |
| 24.04.2021 | 09:00:00 | 9,7  |
| 24.04.2021 | 10:00:00 | 9,9  |
| 24.04.2021 | 11:00:00 | 10,1 |
| 24.04.2021 | 12:00:00 | 10,2 |
| 24.04.2021 | 13:00:00 | 10,2 |
| 24.04.2021 | 14:00:00 | 10,2 |
| 24.04.2021 | 15:00:00 | 10,2 |
| 24.04.2021 | 16:00:00 | 10,2 |
| 24.04.2021 | 17:00:00 | 10,1 |
| 24.04.2021 | 18:00:00 | 10,1 |
| 24.04.2021 | 19:00:00 | 10   |
| 24.04.2021 | 20:00:00 | 9,8  |
| 24.04.2021 | 21:00:00 | 9,7  |
| 24.04.2021 | 22:00:00 | 9,6  |
| 24.04.2021 | 23:00:00 | 9,5  |
| 25.04.2021 | 00:00:00 | 9,5  |
| 25.04.2021 | 01:00:00 | 9,4  |
| 25.04.2021 | 02:00:00 | 9,4  |

|            |          |      |
|------------|----------|------|
| 25.04.2021 | 03:00:00 | 9,4  |
| 25.04.2021 | 04:00:00 | 9,4  |
| 25.04.2021 | 05:00:00 | 9,6  |
| 25.04.2021 | 06:00:00 | 9,6  |
| 25.04.2021 | 07:00:00 | 9,7  |
| 25.04.2021 | 08:00:00 | 9,9  |
| 25.04.2021 | 09:00:00 | 10,1 |
| 25.04.2021 | 10:00:00 | 10,3 |
| 25.04.2021 | 11:00:00 | 10,5 |
| 25.04.2021 | 12:00:00 | 10,5 |
| 25.04.2021 | 13:00:00 | 10,7 |
| 25.04.2021 | 14:00:00 | 10,6 |
| 25.04.2021 | 15:00:00 | 10,5 |
| 25.04.2021 | 16:00:00 | 10,4 |
| 25.04.2021 | 17:00:00 | 10,4 |
| 25.04.2021 | 18:00:00 | 10,3 |
| 25.04.2021 | 19:00:00 | 10,2 |
| 25.04.2021 | 20:00:00 | 10,1 |
| 25.04.2021 | 21:00:00 | 9,9  |
| 25.04.2021 | 22:00:00 | 9,8  |
| 25.04.2021 | 23:00:00 | 9,8  |
| 26.04.2021 | 00:00:00 | 9,7  |
| 26.04.2021 | 01:00:00 | 9,7  |
| 26.04.2021 | 02:00:00 | 9,6  |
| 26.04.2021 | 03:00:00 | 9,6  |
| 26.04.2021 | 04:00:00 | 9,7  |
| 26.04.2021 | 05:00:00 | 9,6  |
| 26.04.2021 | 06:00:00 | 9,7  |
| 26.04.2021 | 07:00:00 | 9,8  |
| 26.04.2021 | 08:00:00 | 10,1 |
| 26.04.2021 | 09:00:00 | 10,4 |
| 26.04.2021 | 10:00:00 | 10,6 |
| 26.04.2021 | 11:00:00 | 10,9 |
| 26.04.2021 | 12:00:00 | 11,1 |
| 26.04.2021 | 13:00:00 | 11   |
| 26.04.2021 | 14:00:00 | 10,9 |
| 26.04.2021 | 15:00:00 | 10,9 |
| 26.04.2021 | 16:00:00 | 10,9 |
| 26.04.2021 | 17:00:00 | 10,9 |
| 26.04.2021 | 18:00:00 | 10,8 |
| 26.04.2021 | 19:00:00 | 10,6 |
| 26.04.2021 | 20:00:00 | 10,3 |
| 26.04.2021 | 21:00:00 | 10,2 |
| 26.04.2021 | 22:00:00 | 10,1 |
| 26.04.2021 | 23:00:00 | 9,9  |
| 27.04.2021 | 00:00:00 | 9,8  |

|            |          |      |
|------------|----------|------|
| 27.04.2021 | 01:00:00 | 9,7  |
| 27.04.2021 | 02:00:00 | 9,6  |
| 27.04.2021 | 03:00:00 | 9,6  |
| 27.04.2021 | 04:00:00 | 9,8  |
| 27.04.2021 | 05:00:00 | 9,7  |
| 27.04.2021 | 06:00:00 | 9,7  |
| 27.04.2021 | 07:00:00 | 9,9  |
| 27.04.2021 | 08:00:00 | 10,2 |
| 27.04.2021 | 09:00:00 | 10,5 |
| 27.04.2021 | 10:00:00 | 10,8 |
| 27.04.2021 | 11:00:00 | 10,9 |
| 27.04.2021 | 12:00:00 | 11   |
| 27.04.2021 | 13:00:00 | 11   |
| 27.04.2021 | 14:00:00 | 11   |
| 27.04.2021 | 15:00:00 | 11,1 |
| 27.04.2021 | 16:00:00 | 11   |
| 27.04.2021 | 17:00:00 | 10,9 |
| 27.04.2021 | 18:00:00 | 10,8 |
| 27.04.2021 | 19:00:00 | 10,6 |
| 27.04.2021 | 20:00:00 | 10,5 |
| 27.04.2021 | 21:00:00 | 10,4 |
| 27.04.2021 | 22:00:00 | 10,3 |
| 27.04.2021 | 23:00:00 | 10,3 |
| 28.04.2021 | 00:00:00 | 10,2 |
| 28.04.2021 | 01:00:00 | 10,2 |
| 28.04.2021 | 02:00:00 | 10,1 |
| 28.04.2021 | 03:00:00 | 10,1 |
| 28.04.2021 | 04:00:00 | 10,1 |
| 28.04.2021 | 05:00:00 | 10,1 |
| 28.04.2021 | 06:00:00 | 10,2 |
| 28.04.2021 | 07:00:00 | 10,3 |
| 28.04.2021 | 08:00:00 | 10,5 |
| 28.04.2021 | 09:00:00 | 10,8 |
| 28.04.2021 | 10:00:00 | 11   |
| 28.04.2021 | 11:00:00 | 11,2 |
| 28.04.2021 | 12:00:00 | 11,4 |
| 28.04.2021 | 13:00:00 | 11,4 |
| 28.04.2021 | 14:00:00 | 11,5 |
| 28.04.2021 | 15:00:00 | 11,4 |
| 28.04.2021 | 16:00:00 | 11,4 |
| 28.04.2021 | 17:00:00 | 11,4 |
| 28.04.2021 | 18:00:00 | 11,3 |
| 28.04.2021 | 19:00:00 | 11,1 |
| 28.04.2021 | 20:00:00 | 11   |
| 28.04.2021 | 21:00:00 | 10,9 |
| 28.04.2021 | 22:00:00 | 10,8 |

|            |          |      |
|------------|----------|------|
| 28.04.2021 | 23:00:00 | 10,7 |
| 29.04.2021 | 00:00:00 | 10,7 |
| 29.04.2021 | 01:00:00 | 10,6 |
| 29.04.2021 | 02:00:00 | 10,6 |
| 29.04.2021 | 03:00:00 | 10,6 |
| 29.04.2021 | 04:00:00 | 10,7 |
| 29.04.2021 | 05:00:00 | 10,7 |
| 29.04.2021 | 06:00:00 | 10,8 |
| 29.04.2021 | 07:00:00 | 10,9 |
| 29.04.2021 | 08:00:00 | 11   |
| 29.04.2021 | 09:00:00 | 11,4 |
| 29.04.2021 | 10:00:00 | 11,6 |
| 29.04.2021 | 11:00:00 | 11,7 |
| 29.04.2021 | 12:00:00 | 12,1 |
| 29.04.2021 | 13:00:00 | 12   |
| 29.04.2021 | 14:00:00 | 12   |
| 29.04.2021 | 15:00:00 | 12,2 |
| 29.04.2021 | 16:00:00 | 12,1 |
| 29.04.2021 | 17:00:00 | 12,1 |
| 29.04.2021 | 18:00:00 | 12   |
| 29.04.2021 | 19:00:00 | 11,8 |
| 29.04.2021 | 20:00:00 | 11,7 |
| 29.04.2021 | 21:00:00 | 11,7 |
| 29.04.2021 | 22:00:00 | 11,6 |
| 29.04.2021 | 23:00:00 | 11,5 |
| 30.04.2021 | 00:00:00 | 11,5 |
| 30.04.2021 | 01:00:00 | 11,5 |
| 30.04.2021 | 02:00:00 | 11,5 |
| 30.04.2021 | 03:00:00 | 11,5 |
| 30.04.2021 | 04:00:00 | 11,5 |
| 30.04.2021 | 05:00:00 | 11,6 |
| 30.04.2021 | 06:00:00 | 11,6 |
| 30.04.2021 | 07:00:00 | 11,7 |
| 30.04.2021 | 08:00:00 | 11,9 |
| 30.04.2021 | 09:00:00 | 12,2 |
| 30.04.2021 | 10:00:00 | 12,4 |
| 30.04.2021 | 11:00:00 | 12,3 |
| 30.04.2021 | 12:00:00 | 12,6 |
| 30.04.2021 | 13:00:00 | 12,7 |
| 30.04.2021 | 14:00:00 | 12,6 |
| 30.04.2021 | 15:00:00 | 12,6 |
| 30.04.2021 | 16:00:00 | 12,7 |
| 30.04.2021 | 17:00:00 | 12,6 |
| 30.04.2021 | 18:00:00 | 12,6 |
| 30.04.2021 | 19:00:00 | 12,5 |
| 30.04.2021 | 20:00:00 | 12,4 |

|            |          |      |
|------------|----------|------|
| 30.04.2021 | 21:00:00 | 12,3 |
| 30.04.2021 | 22:00:00 | 12,2 |
| 30.04.2021 | 23:00:00 | 12,2 |
| 01.05.2021 | 00:00:00 | 12,2 |
| 01.05.2021 | 01:00:00 | 12,2 |
| 01.05.2021 | 02:00:00 | 12,2 |
| 01.05.2021 | 03:00:00 | 12,3 |
| 01.05.2021 | 04:00:00 | 12,4 |
| 01.05.2021 | 05:00:00 | 12,4 |
| 01.05.2021 | 06:00:00 | 12,5 |
| 01.05.2021 | 07:00:00 | 12,6 |
| 01.05.2021 | 08:00:00 | 12,7 |
| 01.05.2021 | 09:00:00 | 12,9 |
| 01.05.2021 | 10:00:00 | 13,1 |
| 01.05.2021 | 11:00:00 | 13,2 |
| 01.05.2021 | 12:00:00 | 13,4 |
| 01.05.2021 | 13:00:00 | 13,3 |
| 01.05.2021 | 14:00:00 | 13,3 |
| 01.05.2021 | 15:00:00 | 13,3 |
| 01.05.2021 | 16:00:00 | 13,3 |
| 01.05.2021 | 17:00:00 | 13,3 |
| 01.05.2021 | 18:00:00 | 13,2 |
| 01.05.2021 | 19:00:00 | 13,2 |
| 01.05.2021 | 20:00:00 | 13,1 |
| 01.05.2021 | 21:00:00 | 13,1 |
| 01.05.2021 | 22:00:00 | 13,1 |
| 01.05.2021 | 23:00:00 | 13,1 |
| 02.05.2021 | 00:00:00 | 13,2 |
| 02.05.2021 | 01:00:00 | 13,2 |
| 02.05.2021 | 02:00:00 | 13,2 |
| 02.05.2021 | 03:00:00 | 13,3 |
| 02.05.2021 | 04:00:00 | 13,3 |
| 02.05.2021 | 05:00:00 | 13,3 |
| 02.05.2021 | 06:00:00 | 13,2 |
| 02.05.2021 | 07:00:00 | 13,2 |
| 02.05.2021 | 08:00:00 | 13,1 |
| 02.05.2021 | 09:00:00 | 13,3 |
| 02.05.2021 | 10:00:00 | 13,3 |
| 02.05.2021 | 11:00:00 | 13,2 |
| 02.05.2021 | 12:00:00 | 13,1 |
| 02.05.2021 | 13:00:00 | 13,1 |
| 02.05.2021 | 14:00:00 | 13,1 |
| 02.05.2021 | 15:00:00 | 13,1 |
| 02.05.2021 | 16:00:00 | 13   |
| 02.05.2021 | 17:00:00 | 13   |
| 02.05.2021 | 18:00:00 | 12,9 |

|            |          |      |
|------------|----------|------|
| 02.05.2021 | 19:00:00 | 12,9 |
| 02.05.2021 | 20:00:00 | 12,9 |
| 02.05.2021 | 21:00:00 | 12,8 |
| 02.05.2021 | 22:00:00 | 12,9 |
| 02.05.2021 | 23:00:00 | 12,9 |
| 03.05.2021 | 00:00:00 | 12,9 |
| 03.05.2021 | 01:00:00 | 12,9 |
| 03.05.2021 | 02:00:00 | 12,8 |
| 03.05.2021 | 03:00:00 | 12,8 |
| 03.05.2021 | 04:00:00 | 12,8 |
| 03.05.2021 | 05:00:00 | 12,8 |
| 03.05.2021 | 06:00:00 | 12,8 |
| 03.05.2021 | 07:00:00 | 12,9 |
| 03.05.2021 | 08:00:00 | 13   |
| 03.05.2021 | 09:00:00 | 13   |
| 03.05.2021 | 10:00:00 | 13   |
| 03.05.2021 | 11:00:00 | 13,3 |
| 03.05.2021 | 12:00:00 | 13,1 |
| 03.05.2021 | 13:00:00 | 13   |
| 03.05.2021 | 14:00:00 | 13   |
| 03.05.2021 | 15:00:00 | 13   |
| 03.05.2021 | 16:00:00 | 13   |
| 03.05.2021 | 17:00:00 | 13   |
| 03.05.2021 | 18:00:00 | 13   |
| 03.05.2021 | 19:00:00 | 12,9 |
| 03.05.2021 | 20:00:00 | 12,8 |
| 03.05.2021 | 21:00:00 | 12,8 |
| 03.05.2021 | 22:00:00 | 12,7 |
| 03.05.2021 | 23:00:00 | 12,7 |
| 04.05.2021 | 00:00:00 | 12,7 |
| 04.05.2021 | 01:00:00 | 12,6 |
| 04.05.2021 | 02:00:00 | 12,6 |
| 04.05.2021 | 03:00:00 | 12,5 |
| 04.05.2021 | 04:00:00 | 12,4 |
| 04.05.2021 | 05:00:00 | 12,4 |
| 04.05.2021 | 06:00:00 | 12,5 |
| 04.05.2021 | 07:00:00 | 12,5 |
| 04.05.2021 | 08:00:00 | 12,6 |
| 04.05.2021 | 09:00:00 | 12,7 |
| 04.05.2021 | 10:00:00 | 12,8 |
| 04.05.2021 | 11:00:00 | 13   |
| 04.05.2021 | 12:00:00 | 13,1 |
| 04.05.2021 | 13:00:00 | 13,1 |
| 04.05.2021 | 14:00:00 | 13   |
| 04.05.2021 | 15:00:00 | 13   |
| 04.05.2021 | 16:00:00 | 13   |



|            |          |      |
|------------|----------|------|
| 04.05.2021 | 17:00:00 | 13   |
| 04.05.2021 | 18:00:00 | 13   |
| 04.05.2021 | 19:00:00 | 13   |
| 04.05.2021 | 20:00:00 | 13   |
| 04.05.2021 | 21:00:00 | 13   |
| 04.05.2021 | 22:00:00 | 13   |
| 04.05.2021 | 23:00:00 | 13   |
| 05.05.2021 | 00:00:00 | 13   |
| 05.05.2021 | 01:00:00 | 13   |
| 05.05.2021 | 02:00:00 | 13   |
| 05.05.2021 | 03:00:00 | 12,9 |
| 05.05.2021 | 04:00:00 | 12,9 |
| 05.05.2021 | 05:00:00 | 12,9 |
| 05.05.2021 | 06:00:00 | 12,8 |
| 05.05.2021 | 07:00:00 | 12,9 |
| 05.05.2021 | 08:00:00 | 12,9 |
| 05.05.2021 | 09:00:00 | 13,1 |
| 05.05.2021 | 10:00:00 | 13,1 |
| 05.05.2021 | 11:00:00 | 13,3 |
| 05.05.2021 | 12:00:00 | 13,1 |
| 05.05.2021 | 13:00:00 | 13   |
| 05.05.2021 | 14:00:00 | 13   |
| 05.05.2021 | 15:00:00 | 12,8 |
| 05.05.2021 | 16:00:00 | 12,8 |
| 05.05.2021 | 17:00:00 | 12,7 |
| 05.05.2021 | 18:00:00 | 12,7 |
| 05.05.2021 | 19:00:00 | 12,7 |
| 05.05.2021 | 20:00:00 | 12,6 |
| 05.05.2021 | 21:00:00 | 12,6 |
| 05.05.2021 | 22:00:00 | 12,5 |
| 05.05.2021 | 23:00:00 | 12,7 |
| 06.05.2021 | 00:00:00 | 12,5 |
| 06.05.2021 | 01:00:00 | 12,5 |
| 06.05.2021 | 02:00:00 | 12,5 |
| 06.05.2021 | 03:00:00 | 12,5 |
| 06.05.2021 | 04:00:00 | 12,5 |
| 06.05.2021 | 05:00:00 | 12,4 |
| 06.05.2021 | 06:00:00 | 12,5 |
| 06.05.2021 | 07:00:00 | 12,5 |
| 06.05.2021 | 08:00:00 | 12,5 |
| 06.05.2021 | 09:00:00 | 12,6 |
| 06.05.2021 | 10:00:00 | 12,6 |
| 06.05.2021 | 11:00:00 | 12,7 |
| 06.05.2021 | 12:00:00 | 12,7 |
| 06.05.2021 | 13:00:00 | 12,8 |
| 06.05.2021 | 14:00:00 | 12,8 |

|            |          |      |
|------------|----------|------|
| 06.05.2021 | 15:00:00 | 12,8 |
| 06.05.2021 | 16:00:00 | 12,8 |
| 06.05.2021 | 17:00:00 | 12,7 |
| 06.05.2021 | 18:00:00 | 12,7 |
| 06.05.2021 | 19:00:00 | 12,6 |
| 06.05.2021 | 20:00:00 | 12,5 |
| 06.05.2021 | 21:00:00 | 12,5 |
| 06.05.2021 | 22:00:00 | 12,5 |
| 06.05.2021 | 23:00:00 | 12,4 |
| 07.05.2021 | 00:00:00 | 12,4 |
| 07.05.2021 | 01:00:00 | 12,4 |
| 07.05.2021 | 02:00:00 | 12,4 |
| 07.05.2021 | 03:00:00 | 12,4 |
| 07.05.2021 | 04:00:00 | 12,4 |
| 07.05.2021 | 05:00:00 | 12,3 |
| 07.05.2021 | 06:00:00 | 12,4 |
| 07.05.2021 | 07:00:00 | 12,4 |
| 07.05.2021 | 08:00:00 | 12,4 |
| 07.05.2021 | 09:00:00 | 12,4 |
| 07.05.2021 | 10:00:00 | 12,4 |
| 07.05.2021 | 11:00:00 | 12,5 |
| 07.05.2021 | 12:00:00 | 12,5 |
| 07.05.2021 | 13:00:00 | 12,5 |
| 07.05.2021 | 14:00:00 | 12,4 |
| 07.05.2021 | 15:00:00 | 12,4 |
| 07.05.2021 | 16:00:00 | 12,3 |
| 07.05.2021 | 17:00:00 | 12,3 |
| 07.05.2021 | 18:00:00 | 12,3 |
| 07.05.2021 | 19:00:00 | 12,3 |
| 07.05.2021 | 20:00:00 | 12,2 |
| 07.05.2021 | 21:00:00 | 12,2 |
| 07.05.2021 | 22:00:00 | 12,2 |
| 07.05.2021 | 23:00:00 | 12,3 |
| 08.05.2021 | 00:00:00 | 12,2 |
| 08.05.2021 | 01:00:00 | 12,2 |
| 08.05.2021 | 02:00:00 | 12,2 |
| 08.05.2021 | 03:00:00 | 12,1 |
| 08.05.2021 | 04:00:00 | 12,1 |
| 08.05.2021 | 05:00:00 | 12   |
| 08.05.2021 | 06:00:00 | 12,1 |
| 08.05.2021 | 07:00:00 | 12,1 |
| 08.05.2021 | 08:00:00 | 12,1 |
| 08.05.2021 | 09:00:00 | 12,2 |
| 08.05.2021 | 10:00:00 | 12,5 |
| 08.05.2021 | 11:00:00 | 12,6 |
| 08.05.2021 | 12:00:00 | 12,6 |

|            |          |      |
|------------|----------|------|
| 08.05.2021 | 13:00:00 | 12,7 |
| 08.05.2021 | 14:00:00 | 12,6 |
| 08.05.2021 | 15:00:00 | 12,6 |
| 08.05.2021 | 16:00:00 | 12,6 |
| 08.05.2021 | 17:00:00 | 12,5 |
| 08.05.2021 | 18:00:00 | 12,4 |
| 08.05.2021 | 19:00:00 | 12,4 |
| 08.05.2021 | 20:00:00 | 12,3 |
| 08.05.2021 | 21:00:00 | 12,3 |
| 08.05.2021 | 22:00:00 | 12,3 |
| 08.05.2021 | 23:00:00 | 12,3 |
| 09.05.2021 | 00:00:00 | 12,2 |
| 09.05.2021 | 01:00:00 | 12,2 |
| 09.05.2021 | 02:00:00 | 12,2 |
| 09.05.2021 | 03:00:00 | 12,1 |
| 09.05.2021 | 04:00:00 | 12,1 |
| 09.05.2021 | 05:00:00 | 12,2 |
| 09.05.2021 | 06:00:00 | 12,2 |
| 09.05.2021 | 07:00:00 | 12,3 |
| 09.05.2021 | 08:00:00 | 12,3 |
| 09.05.2021 | 09:00:00 | 12,5 |
| 09.05.2021 | 10:00:00 | 12,6 |
| 09.05.2021 | 11:00:00 | 12,8 |
| 09.05.2021 | 12:00:00 | 12,9 |
| 09.05.2021 | 13:00:00 | 12,9 |
| 09.05.2021 | 14:00:00 | 12,8 |
| 09.05.2021 | 15:00:00 | 12,9 |
| 09.05.2021 | 16:00:00 | 12,9 |
| 09.05.2021 | 17:00:00 | 12,9 |
| 09.05.2021 | 18:00:00 | 12,8 |
| 09.05.2021 | 19:00:00 | 12,8 |
| 09.05.2021 | 20:00:00 | 12,7 |
| 09.05.2021 | 21:00:00 | 12,7 |
| 09.05.2021 | 22:00:00 | 12,7 |
| 09.05.2021 | 23:00:00 | 12,7 |
| 10.05.2021 | 00:00:00 | 12,7 |
| 10.05.2021 | 01:00:00 | 12,7 |
| 10.05.2021 | 02:00:00 | 12,7 |
| 10.05.2021 | 03:00:00 | 12,7 |
| 10.05.2021 | 04:00:00 | 12,7 |
| 10.05.2021 | 05:00:00 | 12,6 |
| 10.05.2021 | 06:00:00 | 12,6 |
| 10.05.2021 | 07:00:00 | 12,6 |
| 10.05.2021 | 08:00:00 | 12,7 |
| 10.05.2021 | 09:00:00 | 12,8 |
| 10.05.2021 | 10:00:00 | 13   |

|            |          |      |
|------------|----------|------|
| 10.05.2021 | 11:00:00 | 13,1 |
| 10.05.2021 | 12:00:00 | 13,2 |
| 10.05.2021 | 13:00:00 | 13,3 |
| 10.05.2021 | 14:00:00 | 13,2 |
| 10.05.2021 | 15:00:00 | 13,2 |
| 10.05.2021 | 16:00:00 | 13,2 |
| 10.05.2021 | 17:00:00 | 13,2 |
| 10.05.2021 | 18:00:00 | 13,1 |
| 10.05.2021 | 19:00:00 | 13,1 |
| 10.05.2021 | 20:00:00 | 13,1 |
| 10.05.2021 | 21:00:00 | 13,1 |
| 10.05.2021 | 22:00:00 | 13,1 |
| 10.05.2021 | 23:00:00 | 13,1 |
| 11.05.2021 | 00:00:00 | 13,1 |
| 11.05.2021 | 01:00:00 | 13,2 |
| 11.05.2021 | 02:00:00 | 13,2 |
| 11.05.2021 | 03:00:00 | 13,2 |
| 11.05.2021 | 04:00:00 | 13,1 |
| 11.05.2021 | 05:00:00 | 13,1 |
| 11.05.2021 | 06:00:00 | 13,1 |
| 11.05.2021 | 07:00:00 | 13,2 |
| 11.05.2021 | 08:00:00 | 13,2 |
| 11.05.2021 | 09:00:00 | 13,3 |
| 11.05.2021 | 10:00:00 | 13,4 |
| 11.05.2021 | 11:00:00 | 13,5 |
| 11.05.2021 | 12:00:00 | 13,6 |
| 11.05.2021 | 13:00:00 | 13,7 |
| 11.05.2021 | 14:00:00 | 13,6 |
| 11.05.2021 | 15:00:00 | 13,6 |
| 11.05.2021 | 16:00:00 | 13,6 |
| 11.05.2021 | 17:00:00 | 13,6 |
| 11.05.2021 | 18:00:00 | 13,6 |
| 11.05.2021 | 19:00:00 | 13,6 |
| 11.05.2021 | 20:00:00 | 13,6 |
| 11.05.2021 | 21:00:00 | 13,7 |
| 11.05.2021 | 22:00:00 | 13,7 |
| 11.05.2021 | 23:00:00 | 13,7 |
| 12.05.2021 | 00:00:00 | 13,7 |
| 12.05.2021 | 01:00:00 | 13,6 |
| 12.05.2021 | 02:00:00 | 13,6 |
| 12.05.2021 | 03:00:00 | 13,6 |
| 12.05.2021 | 04:00:00 | 13,5 |
| 12.05.2021 | 05:00:00 | 13,5 |
| 12.05.2021 | 06:00:00 | 13,4 |
| 12.05.2021 | 07:00:00 | 13,4 |
| 12.05.2021 | 08:00:00 | 13,4 |

|            |          |      |
|------------|----------|------|
| 12.05.2021 | 09:00:00 | 13,3 |
| 12.05.2021 | 10:00:00 | 13,3 |
| 12.05.2021 | 11:00:00 | 13,3 |
| 12.05.2021 | 12:00:00 | 13,3 |
| 12.05.2021 | 13:00:00 | 13,4 |
| 12.05.2021 | 14:00:00 | 13,5 |
| 12.05.2021 | 15:00:00 | 13,6 |
| 12.05.2021 | 16:00:00 | 13,6 |
| 12.05.2021 | 17:00:00 | 13,6 |
| 12.05.2021 | 18:00:00 | 13,6 |
| 12.05.2021 | 19:00:00 | 13,5 |
| 12.05.2021 | 20:00:00 | 13,4 |
| 12.05.2021 | 21:00:00 | 13,4 |
| 12.05.2021 | 22:00:00 | 13,3 |
| 12.05.2021 | 23:00:00 | 13,2 |
| 13.05.2021 | 00:00:00 | 13,2 |
| 13.05.2021 | 01:00:00 | 13,2 |
| 13.05.2021 | 02:00:00 | 13,1 |
| 13.05.2021 | 03:00:00 | 13,1 |
| 13.05.2021 | 04:00:00 | 13,1 |
| 13.05.2021 | 05:00:00 | 13,1 |
| 13.05.2021 | 06:00:00 | 13,1 |
| 13.05.2021 | 07:00:00 | 13,1 |
| 13.05.2021 | 08:00:00 | 13,2 |
| 13.05.2021 | 09:00:00 | 13,2 |
| 13.05.2021 | 10:00:00 | 13,3 |
| 13.05.2021 | 11:00:00 | 13,3 |
| 13.05.2021 | 12:00:00 | 13,4 |
| 13.05.2021 | 13:00:00 | 13,3 |
| 13.05.2021 | 14:00:00 | 13,3 |
| 13.05.2021 | 15:00:00 | 13,2 |
| 13.05.2021 | 16:00:00 | 13,2 |
| 13.05.2021 | 17:00:00 | 13,1 |
| 13.05.2021 | 18:00:00 | 13,1 |
| 13.05.2021 | 19:00:00 | 13,1 |
| 13.05.2021 | 20:00:00 | 13   |
| 13.05.2021 | 21:00:00 | 13   |
| 13.05.2021 | 22:00:00 | 13   |
| 13.05.2021 | 23:00:00 | 13   |
| 14.05.2021 | 00:00:00 | 13   |
| 14.05.2021 | 01:00:00 | 13   |
| 14.05.2021 | 02:00:00 | 13   |
| 14.05.2021 | 03:00:00 | 12,9 |
| 14.05.2021 | 04:00:00 | 12,9 |
| 14.05.2021 | 05:00:00 | 12,9 |
| 14.05.2021 | 06:00:00 | 12,9 |

|            |          |      |
|------------|----------|------|
| 14.05.2021 | 07:00:00 | 12,9 |
| 14.05.2021 | 08:00:00 | 12,9 |
| 14.05.2021 | 09:00:00 | 12,9 |
| 14.05.2021 | 10:00:00 | 13   |
| 14.05.2021 | 11:00:00 | 13   |
| 14.05.2021 | 12:00:00 | 12,9 |
| 14.05.2021 | 13:00:00 | 13   |
| 14.05.2021 | 14:00:00 | 13   |
| 14.05.2021 | 15:00:00 | 13,1 |
| 14.05.2021 | 16:00:00 | 13,1 |
| 14.05.2021 | 17:00:00 | 13,1 |
| 14.05.2021 | 18:00:00 | 13,1 |
| 14.05.2021 | 19:00:00 | 13,1 |
| 14.05.2021 | 20:00:00 | 13   |
| 14.05.2021 | 21:00:00 | 13   |
| 14.05.2021 | 22:00:00 | 13   |
| 14.05.2021 | 23:00:00 | 12,9 |
| 15.05.2021 | 00:00:00 | 12,9 |
| 15.05.2021 | 01:00:00 | 12,9 |
| 15.05.2021 | 02:00:00 | 12,9 |
| 15.05.2021 | 03:00:00 | 12,9 |
| 15.05.2021 | 04:00:00 | 12,9 |
| 15.05.2021 | 05:00:00 | 12,9 |
| 15.05.2021 | 06:00:00 | 12,9 |
| 15.05.2021 | 07:00:00 | 12,9 |
| 15.05.2021 | 08:00:00 | 12,9 |
| 15.05.2021 | 09:00:00 | 13   |
| 15.05.2021 | 10:00:00 | 13   |
| 15.05.2021 | 11:00:00 | 13   |
| 15.05.2021 | 12:00:00 | 13,1 |
| 15.05.2021 | 13:00:00 | 13,2 |
| 15.05.2021 | 14:00:00 | 13,1 |
| 15.05.2021 | 15:00:00 | 13,1 |
| 15.05.2021 | 16:00:00 | 13   |
| 15.05.2021 | 17:00:00 | 13   |
| 15.05.2021 | 18:00:00 | 12,9 |
| 15.05.2021 | 19:00:00 | 12,8 |
| 15.05.2021 | 20:00:00 | 12,8 |
| 15.05.2021 | 21:00:00 | 12,7 |
| 15.05.2021 | 22:00:00 | 12,7 |
| 15.05.2021 | 23:00:00 | 12,7 |
| 16.05.2021 | 00:00:00 | 12,7 |
| 16.05.2021 | 01:00:00 | 12,7 |
| 16.05.2021 | 02:00:00 | 12,7 |
| 16.05.2021 | 03:00:00 | 12,7 |
| 16.05.2021 | 04:00:00 | 12,6 |

|            |          |      |
|------------|----------|------|
| 16.05.2021 | 05:00:00 | 12,6 |
| 16.05.2021 | 06:00:00 | 12,6 |
| 16.05.2021 | 07:00:00 | 12,7 |
| 16.05.2021 | 08:00:00 | 12,8 |
| 16.05.2021 | 09:00:00 | 12,9 |
| 16.05.2021 | 10:00:00 | 13   |
| 16.05.2021 | 11:00:00 | 13,1 |
| 16.05.2021 | 12:00:00 | 13,2 |
| 16.05.2021 | 13:00:00 | 13,3 |
| 16.05.2021 | 14:00:00 | 13,2 |
| 16.05.2021 | 15:00:00 | 13,2 |
| 16.05.2021 | 16:00:00 | 13,2 |
| 16.05.2021 | 17:00:00 | 13,2 |
| 16.05.2021 | 18:00:00 | 13,1 |
| 16.05.2021 | 19:00:00 | 13,1 |
| 16.05.2021 | 20:00:00 | 13   |
| 16.05.2021 | 21:00:00 | 12,9 |
| 16.05.2021 | 22:00:00 | 12,9 |
| 16.05.2021 | 23:00:00 | 12,8 |
| 17.05.2021 | 00:00:00 | 12,8 |
| 17.05.2021 | 01:00:00 | 12,7 |
| 17.05.2021 | 02:00:00 | 12,7 |
| 17.05.2021 | 03:00:00 | 12,6 |
| 17.05.2021 | 04:00:00 | 12,6 |
| 17.05.2021 | 05:00:00 | 12,6 |
| 17.05.2021 | 06:00:00 | 12,5 |
| 17.05.2021 | 07:00:00 | 12,5 |
| 17.05.2021 | 08:00:00 | 12,5 |
| 17.05.2021 | 09:00:00 | 12,6 |
| 17.05.2021 | 10:00:00 | 12,6 |
| 17.05.2021 | 11:00:00 | 12,6 |
| 17.05.2021 | 12:00:00 | 12,7 |
| 17.05.2021 | 13:00:00 | 12,8 |
| 17.05.2021 | 14:00:00 | 12,8 |
| 17.05.2021 | 15:00:00 | 12,9 |
| 17.05.2021 | 16:00:00 | 12,9 |
| 17.05.2021 | 17:00:00 | 12,9 |
| 17.05.2021 | 18:00:00 | 12,9 |
| 17.05.2021 | 19:00:00 | 12,8 |
| 17.05.2021 | 20:00:00 | 12,8 |
| 17.05.2021 | 21:00:00 | 12,7 |
| 17.05.2021 | 22:00:00 | 12,7 |
| 17.05.2021 | 23:00:00 | 12,7 |
| 18.05.2021 | 00:00:00 | 12,6 |
| 18.05.2021 | 01:00:00 | 12,6 |
| 18.05.2021 | 02:00:00 | 12,6 |

|            |          |      |
|------------|----------|------|
| 18.05.2021 | 03:00:00 | 12,5 |
| 18.05.2021 | 04:00:00 | 12,5 |
| 18.05.2021 | 05:00:00 | 12,6 |
| 18.05.2021 | 06:00:00 | 12,6 |
| 18.05.2021 | 07:00:00 | 12,6 |
| 18.05.2021 | 08:00:00 | 12,8 |
| 18.05.2021 | 09:00:00 | 12,8 |
| 18.05.2021 | 10:00:00 | 12,9 |
| 18.05.2021 | 11:00:00 | 12,9 |
| 18.05.2021 | 12:00:00 | 13,1 |
| 18.05.2021 | 13:00:00 | 13,1 |
| 18.05.2021 | 14:00:00 | 13,1 |
| 18.05.2021 | 15:00:00 | 13,1 |
| 18.05.2021 | 16:00:00 | 13,1 |
| 18.05.2021 | 17:00:00 | 13,1 |
| 18.05.2021 | 18:00:00 | 13   |
| 18.05.2021 | 19:00:00 | 13   |
| 18.05.2021 | 20:00:00 | 12,9 |
| 18.05.2021 | 21:00:00 | 12,9 |
| 18.05.2021 | 22:00:00 | 12,8 |
| 18.05.2021 | 23:00:00 | 12,8 |
| 19.05.2021 | 00:00:00 | 12,8 |
| 19.05.2021 | 01:00:00 | 12,7 |
| 19.05.2021 | 02:00:00 | 12,7 |
| 19.05.2021 | 03:00:00 | 12,7 |
| 19.05.2021 | 04:00:00 | 12,6 |
| 19.05.2021 | 05:00:00 | 12,6 |
| 19.05.2021 | 06:00:00 | 12,6 |
| 19.05.2021 | 07:00:00 | 12,6 |
| 19.05.2021 | 08:00:00 | 12,7 |
| 19.05.2021 | 09:00:00 | 12,8 |
| 19.05.2021 | 10:00:00 | 12,8 |
| 19.05.2021 | 11:00:00 | 12,9 |
| 19.05.2021 | 12:00:00 | 13   |
| 19.05.2021 | 13:00:00 | 13,1 |
| 19.05.2021 | 14:00:00 | 13   |
| 19.05.2021 | 15:00:00 | 13   |
| 19.05.2021 | 16:00:00 | 13,1 |
| 19.05.2021 | 17:00:00 | 13,1 |
| 19.05.2021 | 18:00:00 | 13   |
| 19.05.2021 | 19:00:00 | 13   |
| 19.05.2021 | 20:00:00 | 13   |
| 19.05.2021 | 21:00:00 | 12,9 |
| 19.05.2021 | 22:00:00 | 12,9 |
| 19.05.2021 | 23:00:00 | 12,8 |
| 20.05.2021 | 00:00:00 | 12,8 |



|            |          |      |
|------------|----------|------|
| 20.05.2021 | 01:00:00 | 12,8 |
| 20.05.2021 | 02:00:00 | 12,7 |
| 20.05.2021 | 03:00:00 | 12,7 |
| 20.05.2021 | 04:00:00 | 12,6 |
| 20.05.2021 | 05:00:00 | 12,6 |
| 20.05.2021 | 06:00:00 | 12,6 |
| 20.05.2021 | 07:00:00 | 12,6 |
| 20.05.2021 | 08:00:00 | 12,6 |
| 20.05.2021 | 09:00:00 | 12,8 |
| 20.05.2021 | 10:00:00 | 12,9 |
| 20.05.2021 | 11:00:00 | 12,9 |
| 20.05.2021 | 12:00:00 | 12,9 |
| 20.05.2021 | 13:00:00 | 12,9 |
| 20.05.2021 | 14:00:00 | 13   |
| 20.05.2021 | 15:00:00 | 13   |
| 20.05.2021 | 16:00:00 | 12,9 |
| 20.05.2021 | 17:00:00 | 12,8 |
| 20.05.2021 | 18:00:00 | 12,9 |
| 20.05.2021 | 19:00:00 | 12,9 |
| 20.05.2021 | 20:00:00 | 12,8 |
| 20.05.2021 | 21:00:00 | 12,8 |
| 20.05.2021 | 22:00:00 | 12,8 |
| 20.05.2021 | 23:00:00 | 12,7 |
| 21.05.2021 | 00:00:00 | 12,7 |
| 21.05.2021 | 01:00:00 | 12,6 |
| 21.05.2021 | 02:00:00 | 12,6 |
| 21.05.2021 | 03:00:00 | 12,6 |
| 21.05.2021 | 04:00:00 | 12,5 |
| 21.05.2021 | 05:00:00 | 12,5 |
| 21.05.2021 | 06:00:00 | 12,5 |
| 21.05.2021 | 07:00:00 | 12,6 |
| 21.05.2021 | 08:00:00 | 12,7 |
| 21.05.2021 | 09:00:00 | 12,8 |
| 21.05.2021 | 10:00:00 | 12,9 |
| 21.05.2021 | 11:00:00 | 13   |
| 21.05.2021 | 12:00:00 | 13,1 |
| 21.05.2021 | 13:00:00 | 13   |
| 21.05.2021 | 14:00:00 | 13   |
| 21.05.2021 | 15:00:00 | 13   |
| 21.05.2021 | 16:00:00 | 12,9 |
| 21.05.2021 | 17:00:00 | 12,9 |
| 21.05.2021 | 18:00:00 | 12,9 |
| 21.05.2021 | 19:00:00 | 12,8 |
| 21.05.2021 | 20:00:00 | 12,8 |
| 21.05.2021 | 21:00:00 | 12,7 |
| 21.05.2021 | 22:00:00 | 12,7 |

|            |          |      |
|------------|----------|------|
| 21.05.2021 | 23:00:00 | 12,6 |
| 22.05.2021 | 00:00:00 | 12,6 |
| 22.05.2021 | 01:00:00 | 12,5 |
| 22.05.2021 | 02:00:00 | 12,5 |
| 22.05.2021 | 03:00:00 | 12,4 |
| 22.05.2021 | 04:00:00 | 12,4 |
| 22.05.2021 | 05:00:00 | 12,4 |
| 22.05.2021 | 06:00:00 | 12,4 |
| 22.05.2021 | 07:00:00 | 12,4 |
| 22.05.2021 | 08:00:00 | 12,4 |
| 22.05.2021 | 09:00:00 | 12,5 |
| 22.05.2021 | 10:00:00 | 12,5 |
| 22.05.2021 | 11:00:00 | 12,5 |
| 22.05.2021 | 12:00:00 | 12,6 |
| 22.05.2021 | 13:00:00 | 12,6 |
| 22.05.2021 | 14:00:00 | 12,6 |
| 22.05.2021 | 15:00:00 | 12,7 |
| 22.05.2021 | 16:00:00 | 12,7 |
| 22.05.2021 | 17:00:00 | 12,7 |
| 22.05.2021 | 18:00:00 | 12,7 |
| 22.05.2021 | 19:00:00 | 12,6 |
| 22.05.2021 | 20:00:00 | 12,6 |
| 22.05.2021 | 21:00:00 | 12,6 |
| 22.05.2021 | 22:00:00 | 12,5 |
| 22.05.2021 | 23:00:00 | 12,5 |
| 23.05.2021 | 00:00:00 | 12,5 |
| 23.05.2021 | 01:00:00 | 12,5 |
| 23.05.2021 | 02:00:00 | 12,5 |
| 23.05.2021 | 03:00:00 | 12,5 |
| 23.05.2021 | 04:00:00 | 12,4 |
| 23.05.2021 | 05:00:00 | 12,4 |
| 23.05.2021 | 06:00:00 | 12,4 |
| 23.05.2021 | 07:00:00 | 12,4 |
| 23.05.2021 | 08:00:00 | 12,4 |
| 23.05.2021 | 09:00:00 | 12,4 |
| 23.05.2021 | 10:00:00 | 12,4 |
| 23.05.2021 | 11:00:00 | 12,4 |
| 23.05.2021 | 12:00:00 | 12,4 |
| 23.05.2021 | 13:00:00 | 12,5 |
| 23.05.2021 | 14:00:00 | 12,5 |
| 23.05.2021 | 15:00:00 | 12,6 |
| 23.05.2021 | 16:00:00 | 12,7 |
| 23.05.2021 | 17:00:00 | 12,7 |
| 23.05.2021 | 18:00:00 | 12,7 |
| 23.05.2021 | 19:00:00 | 12,7 |
| 23.05.2021 | 20:00:00 | 12,6 |

|            |          |      |
|------------|----------|------|
| 23.05.2021 | 21:00:00 | 12,6 |
| 23.05.2021 | 22:00:00 | 12,5 |
| 23.05.2021 | 23:00:00 | 12,5 |
| 24.05.2021 | 00:00:00 | 12,4 |
| 24.05.2021 | 01:00:00 | 12,4 |
| 24.05.2021 | 02:00:00 | 12,4 |
| 24.05.2021 | 03:00:00 | 12,4 |
| 24.05.2021 | 04:00:00 | 12,3 |
| 24.05.2021 | 05:00:00 | 12,3 |
| 24.05.2021 | 06:00:00 | 12,4 |
| 24.05.2021 | 07:00:00 | 12,4 |
| 24.05.2021 | 08:00:00 | 12,5 |
| 24.05.2021 | 09:00:00 | 12,5 |
| 24.05.2021 | 10:00:00 | 12,6 |
| 24.05.2021 | 11:00:00 | 12,5 |
| 24.05.2021 | 12:00:00 | 12,5 |
| 24.05.2021 | 13:00:00 | 12,5 |
| 24.05.2021 | 14:00:00 | 12,5 |
| 24.05.2021 | 15:00:00 | 12,5 |
| 24.05.2021 | 16:00:00 | 12,5 |
| 24.05.2021 | 17:00:00 | 12,5 |
| 24.05.2021 | 18:00:00 | 12,5 |
| 24.05.2021 | 19:00:00 | 12,5 |
| 24.05.2021 | 20:00:00 | 12,5 |
| 24.05.2021 | 21:00:00 | 12,5 |
| 24.05.2021 | 22:00:00 | 12,4 |
| 24.05.2021 | 23:00:00 | 12,4 |
| 25.05.2021 | 00:00:00 | 12,4 |
| 25.05.2021 | 01:00:00 | 12,4 |
| 25.05.2021 | 02:00:00 | 12,4 |
| 25.05.2021 | 03:00:00 | 12,4 |
| 25.05.2021 | 04:00:00 | 12,4 |
| 25.05.2021 | 05:00:00 | 12,4 |
| 25.05.2021 | 06:00:00 | 12,3 |
| 25.05.2021 | 07:00:00 | 12,3 |
| 25.05.2021 | 08:00:00 | 12,3 |
| 25.05.2021 | 09:00:00 | 12,4 |
| 25.05.2021 | 10:00:00 | 12,4 |
| 25.05.2021 | 11:00:00 | 12,5 |
| 25.05.2021 | 12:00:00 | 12,4 |
| 25.05.2021 | 13:00:00 | 12,4 |
| 25.05.2021 | 14:00:00 | 12,4 |
| 25.05.2021 | 15:00:00 | 12,3 |
| 25.05.2021 | 16:00:00 | 12,3 |
| 25.05.2021 | 17:00:00 | 12,2 |
| 25.05.2021 | 18:00:00 | 12,2 |

|            |          |      |
|------------|----------|------|
| 25.05.2021 | 19:00:00 | 12,2 |
| 25.05.2021 | 20:00:00 | 12,2 |
| 25.05.2021 | 21:00:00 | 12,2 |
| 25.05.2021 | 22:00:00 | 12,1 |
| 25.05.2021 | 23:00:00 | 12,1 |
| 26.05.2021 | 00:00:00 | 12,1 |
| 26.05.2021 | 01:00:00 | 12,1 |
| 26.05.2021 | 02:00:00 | 12,1 |
| 26.05.2021 | 03:00:00 | 12   |
| 26.05.2021 | 04:00:00 | 12   |
| 26.05.2021 | 05:00:00 | 12   |
| 26.05.2021 | 06:00:00 | 12,1 |
| 26.05.2021 | 07:00:00 | 12,1 |
| 26.05.2021 | 08:00:00 | 12,2 |
| 26.05.2021 | 09:00:00 | 12,3 |
| 26.05.2021 | 10:00:00 | 12,5 |
| 26.05.2021 | 11:00:00 | 12,5 |
| 26.05.2021 | 12:00:00 | 12,6 |
| 26.05.2021 | 13:00:00 | 12,7 |
| 26.05.2021 | 14:00:00 | 12,7 |
| 26.05.2021 | 15:00:00 | 12,7 |
| 26.05.2021 | 16:00:00 | 12,7 |
| 26.05.2021 | 17:00:00 | 12,7 |
| 26.05.2021 | 18:00:00 | 12,6 |
| 26.05.2021 | 19:00:00 | 12,6 |
| 26.05.2021 | 20:00:00 | 12,6 |
| 26.05.2021 | 21:00:00 | 12,6 |
| 26.05.2021 | 22:00:00 | 12,6 |
| 26.05.2021 | 23:00:00 | 12,6 |
| 27.05.2021 | 00:00:00 | 12,6 |
| 27.05.2021 | 01:00:00 | 12,6 |
| 27.05.2021 | 02:00:00 | 12,6 |
| 27.05.2021 | 03:00:00 | 12,6 |
| 27.05.2021 | 04:00:00 | 12,6 |
| 27.05.2021 | 05:00:00 | 12,6 |
| 27.05.2021 | 06:00:00 | 12,6 |
| 27.05.2021 | 07:00:00 | 12,6 |
| 27.05.2021 | 08:00:00 | 12,6 |
| 27.05.2021 | 09:00:00 | 12,6 |
| 27.05.2021 | 10:00:00 | 12,7 |
| 27.05.2021 | 11:00:00 | 12,8 |
| 27.05.2021 | 12:00:00 | 12,9 |
| 27.05.2021 | 13:00:00 | 13   |
| 27.05.2021 | 14:00:00 | 13   |
| 27.05.2021 | 15:00:00 | 13,1 |
| 27.05.2021 | 16:00:00 | 13,1 |

|            |          |      |
|------------|----------|------|
| 27.05.2021 | 17:00:00 | 13,1 |
| 27.05.2021 | 18:00:00 | 13,1 |
| 27.05.2021 | 19:00:00 | 13   |
| 27.05.2021 | 20:00:00 | 12,9 |
| 27.05.2021 | 21:00:00 | 12,9 |
| 27.05.2021 | 22:00:00 | 12,8 |
| 27.05.2021 | 23:00:00 | 12,8 |
| 28.05.2021 | 00:00:00 | 12,8 |
| 28.05.2021 | 01:00:00 | 12,7 |
| 28.05.2021 | 02:00:00 | 12,7 |
| 28.05.2021 | 03:00:00 | 12,7 |
| 28.05.2021 | 04:00:00 | 12,6 |
| 28.05.2021 | 05:00:00 | 12,6 |
| 28.05.2021 | 06:00:00 | 12,6 |
| 28.05.2021 | 07:00:00 | 12,7 |
| 28.05.2021 | 08:00:00 | 12,8 |
| 28.05.2021 | 09:00:00 | 12,8 |
| 28.05.2021 | 10:00:00 | 12,9 |
| 28.05.2021 | 11:00:00 | 12,9 |
| 28.05.2021 | 12:00:00 | 12,9 |
| 28.05.2021 | 13:00:00 | 12,8 |
| 28.05.2021 | 14:00:00 | 12,9 |
| 28.05.2021 | 15:00:00 | 12,8 |
| 28.05.2021 | 16:00:00 | 12,9 |
| 28.05.2021 | 17:00:00 | 12,9 |
| 28.05.2021 | 18:00:00 | 12,9 |
| 28.05.2021 | 19:00:00 | 12,8 |
| 28.05.2021 | 20:00:00 | 12,8 |
| 28.05.2021 | 21:00:00 | 12,8 |
| 28.05.2021 | 22:00:00 | 12,8 |
| 28.05.2021 | 23:00:00 | 12,8 |
| 29.05.2021 | 00:00:00 | 12,8 |
| 29.05.2021 | 01:00:00 | 12,8 |
| 29.05.2021 | 02:00:00 | 12,8 |
| 29.05.2021 | 03:00:00 | 12,8 |
| 29.05.2021 | 04:00:00 | 12,7 |
| 29.05.2021 | 05:00:00 | 12,7 |
| 29.05.2021 | 06:00:00 | 12,8 |
| 29.05.2021 | 07:00:00 | 12,8 |
| 29.05.2021 | 08:00:00 | 12,9 |
| 29.05.2021 | 09:00:00 | 13   |
| 29.05.2021 | 10:00:00 | 13,1 |
| 29.05.2021 | 11:00:00 | 13,1 |
| 29.05.2021 | 12:00:00 | 13,3 |
| 29.05.2021 | 13:00:00 | 13,3 |
| 29.05.2021 | 14:00:00 | 13,2 |

|            |          |      |
|------------|----------|------|
| 29.05.2021 | 15:00:00 | 13,2 |
| 29.05.2021 | 16:00:00 | 13,2 |
| 29.05.2021 | 17:00:00 | 13,1 |
| 29.05.2021 | 18:00:00 | 13   |
| 29.05.2021 | 19:00:00 | 12,9 |
| 29.05.2021 | 20:00:00 | 12,9 |
| 29.05.2021 | 21:00:00 | 12,8 |
| 29.05.2021 | 22:00:00 | 12,8 |
| 29.05.2021 | 23:00:00 | 12,7 |
| 30.05.2021 | 00:00:00 | 12,7 |
| 30.05.2021 | 01:00:00 | 12,7 |
| 30.05.2021 | 02:00:00 | 12,6 |
| 30.05.2021 | 03:00:00 | 12,6 |
| 30.05.2021 | 04:00:00 | 12,6 |
| 30.05.2021 | 05:00:00 | 12,6 |
| 30.05.2021 | 06:00:00 | 12,6 |
| 30.05.2021 | 07:00:00 | 12,7 |
| 30.05.2021 | 08:00:00 | 12,9 |
| 30.05.2021 | 09:00:00 | 12,9 |
| 30.05.2021 | 10:00:00 | 12,9 |
| 30.05.2021 | 11:00:00 | 13   |
| 30.05.2021 | 12:00:00 | 13,1 |
| 30.05.2021 | 13:00:00 | 13   |
| 30.05.2021 | 14:00:00 | 13   |
| 30.05.2021 | 15:00:00 | 13   |
| 30.05.2021 | 16:00:00 | 13   |
| 30.05.2021 | 17:00:00 | 13   |
| 30.05.2021 | 18:00:00 | 13   |
| 30.05.2021 | 19:00:00 | 13   |
| 30.05.2021 | 20:00:00 | 12,9 |
| 30.05.2021 | 21:00:00 | 12,9 |
| 30.05.2021 | 22:00:00 | 12,8 |
| 30.05.2021 | 23:00:00 | 12,7 |
| 31.05.2021 | 00:00:00 | 12,7 |
| 31.05.2021 | 01:00:00 | 12,6 |
| 31.05.2021 | 02:00:00 | 12,6 |
| 31.05.2021 | 03:00:00 | 12,6 |
| 31.05.2021 | 04:00:00 | 12,5 |
| 31.05.2021 | 05:00:00 | 12,5 |
| 31.05.2021 | 06:00:00 | 12,6 |
| 31.05.2021 | 07:00:00 | 12,7 |
| 31.05.2021 | 08:00:00 | 12,9 |
| 31.05.2021 | 09:00:00 | 13   |
| 31.05.2021 | 10:00:00 | 13,2 |
| 31.05.2021 | 11:00:00 | 13,2 |
| 31.05.2021 | 12:00:00 | 13,2 |

|            |          |      |
|------------|----------|------|
| 31.05.2021 | 13:00:00 | 13,2 |
| 31.05.2021 | 14:00:00 | 13,3 |
| 31.05.2021 | 15:00:00 | 13,4 |
| 31.05.2021 | 16:00:00 | 13,4 |
| 31.05.2021 | 17:00:00 | 13,3 |
| 31.05.2021 | 18:00:00 | 13,3 |
| 31.05.2021 | 19:00:00 | 13,2 |
| 31.05.2021 | 20:00:00 | 13,2 |
| 31.05.2021 | 21:00:00 | 13,1 |
| 31.05.2021 | 22:00:00 | 13,1 |
| 31.05.2021 | 23:00:00 | 13   |
| 01.04.2022 | 00:00:00 | 9,5  |
| 01.04.2022 | 01:00:00 | 9,5  |
| 01.04.2022 | 02:00:00 | 9,6  |
| 01.04.2022 | 03:00:00 | 9,6  |
| 01.04.2022 | 04:00:00 | 9,6  |
| 01.04.2022 | 05:00:00 | 9,6  |
| 01.04.2022 | 06:00:00 | 9,6  |
| 01.04.2022 | 07:00:00 | 9,5  |
| 01.04.2022 | 08:00:00 | 9,5  |
| 01.04.2022 | 09:00:00 | 9,5  |
| 01.04.2022 | 10:00:00 | 9,5  |
| 01.04.2022 | 11:00:00 | 9,5  |
| 01.04.2022 | 12:00:00 | 9,5  |
| 01.04.2022 | 13:00:00 | 9,5  |
| 01.04.2022 | 14:00:00 | 9,5  |
| 01.04.2022 | 15:00:00 | 9,4  |
| 01.04.2022 | 16:00:00 | 9,4  |
| 01.04.2022 | 17:00:00 | 9,4  |
| 01.04.2022 | 18:00:00 | 9,4  |
| 01.04.2022 | 19:00:00 | 9,3  |
| 01.04.2022 | 20:00:00 | 9,3  |
| 01.04.2022 | 21:00:00 | 9,2  |
| 01.04.2022 | 22:00:00 | 9,2  |
| 01.04.2022 | 23:00:00 | 9,2  |
| 02.04.2022 | 00:00:00 | 9,2  |
| 02.04.2022 | 01:00:00 | 9,2  |
| 02.04.2022 | 02:00:00 | 9,1  |
| 02.04.2022 | 03:00:00 | 9,1  |
| 02.04.2022 | 04:00:00 | 9,1  |
| 02.04.2022 | 05:00:00 | 9,1  |
| 02.04.2022 | 06:00:00 | 9,1  |
| 02.04.2022 | 07:00:00 | 9,1  |
| 02.04.2022 | 08:00:00 | 9,1  |
| 02.04.2022 | 09:00:00 | 9,1  |
| 02.04.2022 | 10:00:00 | 9,1  |

|            |          |     |
|------------|----------|-----|
| 02.04.2022 | 11:00:00 | 9,1 |
| 02.04.2022 | 12:00:00 | 9,1 |
| 02.04.2022 | 13:00:00 | 9,1 |
| 02.04.2022 | 14:00:00 | 9,1 |
| 02.04.2022 | 15:00:00 | 9,1 |
| 02.04.2022 | 16:00:00 | 9   |
| 02.04.2022 | 17:00:00 | 9   |
| 02.04.2022 | 18:00:00 | 8,9 |
| 02.04.2022 | 19:00:00 | 8,9 |
| 02.04.2022 | 20:00:00 | 8,9 |
| 02.04.2022 | 21:00:00 | 8,8 |
| 02.04.2022 | 22:00:00 | 8,8 |
| 02.04.2022 | 23:00:00 | 8,8 |
| 03.04.2022 | 00:00:00 | 8,8 |
| 03.04.2022 | 01:00:00 | 8,8 |
| 03.04.2022 | 02:00:00 | 8,8 |
| 03.04.2022 | 03:00:00 | 8,8 |
| 03.04.2022 | 04:00:00 | 8,8 |
| 03.04.2022 | 05:00:00 | 8,8 |
| 03.04.2022 | 06:00:00 | 8,8 |
| 03.04.2022 | 07:00:00 | 8,8 |
| 03.04.2022 | 08:00:00 | 8,8 |
| 03.04.2022 | 09:00:00 | 8,8 |
| 03.04.2022 | 10:00:00 | 8,9 |
| 03.04.2022 | 11:00:00 | 8,9 |
| 03.04.2022 | 12:00:00 | 8,9 |
| 03.04.2022 | 13:00:00 | 8,9 |
| 03.04.2022 | 14:00:00 | 8,9 |
| 03.04.2022 | 15:00:00 | 8,8 |
| 03.04.2022 | 16:00:00 | 8,8 |
| 03.04.2022 | 17:00:00 | 8,8 |
| 03.04.2022 | 18:00:00 | 8,8 |
| 03.04.2022 | 19:00:00 | 8,7 |
| 03.04.2022 | 20:00:00 | 8,7 |
| 03.04.2022 | 21:00:00 | 8,5 |
| 03.04.2022 | 22:00:00 | 8,6 |
| 03.04.2022 | 23:00:00 | 8,6 |
| 04.04.2022 | 00:00:00 | 8,6 |
| 04.04.2022 | 01:00:00 | 8,6 |
| 04.04.2022 | 02:00:00 | 8,5 |
| 04.04.2022 | 03:00:00 | 8,5 |
| 04.04.2022 | 04:00:00 | 8,5 |
| 04.04.2022 | 05:00:00 | 8,6 |
| 04.04.2022 | 06:00:00 | 8,6 |
| 04.04.2022 | 07:00:00 | 8,6 |
| 04.04.2022 | 08:00:00 | 8,7 |



|            |          |     |
|------------|----------|-----|
| 04.04.2022 | 09:00:00 | 8,7 |
| 04.04.2022 | 10:00:00 | 8,9 |
| 04.04.2022 | 11:00:00 | 9   |
| 04.04.2022 | 12:00:00 | 9,1 |
| 04.04.2022 | 13:00:00 | 9,1 |
| 04.04.2022 | 14:00:00 | 9,1 |
| 04.04.2022 | 15:00:00 | 9,1 |
| 04.04.2022 | 16:00:00 | 9,1 |
| 04.04.2022 | 17:00:00 | 9,1 |
| 04.04.2022 | 18:00:00 | 9   |
| 04.04.2022 | 19:00:00 | 8,9 |
| 04.04.2022 | 20:00:00 | 8,8 |
| 04.04.2022 | 21:00:00 | 8,8 |
| 04.04.2022 | 22:00:00 | 8,7 |
| 04.04.2022 | 23:00:00 | 8,7 |
| 05.04.2022 | 00:00:00 | 8,7 |
| 05.04.2022 | 01:00:00 | 8,7 |
| 05.04.2022 | 02:00:00 | 8,7 |
| 05.04.2022 | 03:00:00 | 8,7 |
| 05.04.2022 | 04:00:00 | 8,7 |
| 05.04.2022 | 05:00:00 | 8,7 |
| 05.04.2022 | 06:00:00 | 8,7 |
| 05.04.2022 | 07:00:00 | 8,8 |
| 05.04.2022 | 08:00:00 | 8,8 |
| 05.04.2022 | 09:00:00 | 8,8 |
| 05.04.2022 | 10:00:00 | 8,8 |
| 05.04.2022 | 11:00:00 | 8,9 |
| 05.04.2022 | 12:00:00 | 8,9 |
| 05.04.2022 | 13:00:00 | 8,9 |
| 05.04.2022 | 14:00:00 | 9   |
| 05.04.2022 | 15:00:00 | 9   |
| 05.04.2022 | 16:00:00 | 8,9 |
| 05.04.2022 | 17:00:00 | 8,9 |
| 05.04.2022 | 18:00:00 | 8,8 |
| 05.04.2022 | 19:00:00 | 8,8 |
| 05.04.2022 | 20:00:00 | 8,7 |
| 05.04.2022 | 21:00:00 | 8,7 |
| 05.04.2022 | 22:00:00 | 8,6 |
| 05.04.2022 | 23:00:00 | 8,6 |
| 06.04.2022 | 00:00:00 | 8,6 |
| 06.04.2022 | 01:00:00 | 8,6 |
| 06.04.2022 | 02:00:00 | 8,6 |
| 06.04.2022 | 03:00:00 | 8,7 |
| 06.04.2022 | 04:00:00 | 8,7 |
| 06.04.2022 | 05:00:00 | 8,8 |
| 06.04.2022 | 06:00:00 | 8,9 |

|            |          |     |
|------------|----------|-----|
| 06.04.2022 | 07:00:00 | 8,9 |
| 06.04.2022 | 08:00:00 | 9   |
| 06.04.2022 | 09:00:00 | 9,2 |
| 06.04.2022 | 10:00:00 | 9,3 |
| 06.04.2022 | 11:00:00 | 9,4 |
| 06.04.2022 | 12:00:00 | 9,5 |
| 06.04.2022 | 13:00:00 | 9,4 |
| 06.04.2022 | 14:00:00 | 9,4 |
| 06.04.2022 | 15:00:00 | 9,4 |
| 06.04.2022 | 16:00:00 | 9,4 |
| 06.04.2022 | 17:00:00 | 9,3 |
| 06.04.2022 | 18:00:00 | 9,3 |
| 06.04.2022 | 19:00:00 | 9,2 |
| 06.04.2022 | 20:00:00 | 9,1 |
| 06.04.2022 | 21:00:00 | 9,1 |
| 06.04.2022 | 22:00:00 | 9,1 |
| 06.04.2022 | 23:00:00 | 9   |
| 07.04.2022 | 00:00:00 | 9,1 |
| 07.04.2022 | 01:00:00 | 9,1 |
| 07.04.2022 | 02:00:00 | 9,2 |
| 07.04.2022 | 03:00:00 | 9,2 |
| 07.04.2022 | 04:00:00 | 9,2 |
| 07.04.2022 | 05:00:00 | 9,2 |
| 07.04.2022 | 06:00:00 | 9,2 |
| 07.04.2022 | 07:00:00 | 9,2 |
| 07.04.2022 | 08:00:00 | 9,3 |
| 07.04.2022 | 09:00:00 | 9,2 |
| 07.04.2022 | 10:00:00 | 9,3 |
| 07.04.2022 | 11:00:00 | 9,4 |
| 07.04.2022 | 12:00:00 | 9,4 |
| 07.04.2022 | 13:00:00 | 9,5 |
| 07.04.2022 | 14:00:00 | 9,5 |
| 07.04.2022 | 15:00:00 | 9,6 |
| 07.04.2022 | 16:00:00 | 9,5 |
| 07.04.2022 | 17:00:00 | 9,5 |
| 07.04.2022 | 18:00:00 | 9,5 |
| 07.04.2022 | 19:00:00 | 9,4 |
| 07.04.2022 | 20:00:00 | 9,4 |
| 07.04.2022 | 21:00:00 | 9,4 |
| 07.04.2022 | 22:00:00 | 9,4 |
| 07.04.2022 | 23:00:00 | 9,4 |
| 08.04.2022 | 00:00:00 | 9,4 |
| 08.04.2022 | 01:00:00 | 9,5 |
| 08.04.2022 | 02:00:00 | 9,5 |
| 08.04.2022 | 03:00:00 | 9,5 |
| 08.04.2022 | 04:00:00 | 9,4 |

|            |          |     |
|------------|----------|-----|
| 08.04.2022 | 05:00:00 | 9,4 |
| 08.04.2022 | 06:00:00 | 9,3 |
| 08.04.2022 | 07:00:00 | 9,3 |
| 08.04.2022 | 08:00:00 | 9,3 |
| 08.04.2022 | 09:00:00 | 9,3 |
| 08.04.2022 | 10:00:00 | 9,4 |
| 08.04.2022 | 11:00:00 | 9,5 |
| 08.04.2022 | 12:00:00 | 9,6 |
| 08.04.2022 | 13:00:00 | 9,6 |
| 08.04.2022 | 14:00:00 | 9,6 |
| 08.04.2022 | 15:00:00 | 9,6 |
| 08.04.2022 | 16:00:00 | 9,5 |
| 08.04.2022 | 17:00:00 | 9,5 |
| 08.04.2022 | 18:00:00 | 9,5 |
| 08.04.2022 | 19:00:00 | 9,5 |
| 08.04.2022 | 20:00:00 | 9,5 |
| 08.04.2022 | 21:00:00 | 9,5 |
| 08.04.2022 | 22:00:00 | 9,4 |
| 08.04.2022 | 23:00:00 | 9,4 |
| 09.04.2022 | 00:00:00 | 9,3 |
| 09.04.2022 | 01:00:00 | 9,3 |
| 09.04.2022 | 02:00:00 | 9,3 |
| 09.04.2022 | 03:00:00 | 9,3 |
| 09.04.2022 | 04:00:00 | 9,2 |
| 09.04.2022 | 05:00:00 | 9,2 |
| 09.04.2022 | 06:00:00 | 9,1 |
| 09.04.2022 | 07:00:00 | 9,1 |
| 09.04.2022 | 08:00:00 | 9,1 |
| 09.04.2022 | 09:00:00 | 9,1 |
| 09.04.2022 | 10:00:00 | 9   |
| 09.04.2022 | 11:00:00 | 9,1 |
| 09.04.2022 | 12:00:00 | 9,1 |
| 09.04.2022 | 13:00:00 | 9,1 |
| 09.04.2022 | 14:00:00 | 9,2 |
| 09.04.2022 | 15:00:00 | 9,2 |
| 09.04.2022 | 16:00:00 | 9,2 |
| 09.04.2022 | 17:00:00 | 9,1 |
| 09.04.2022 | 18:00:00 | 9,1 |
| 09.04.2022 | 19:00:00 | 9   |
| 09.04.2022 | 20:00:00 | 9   |
| 09.04.2022 | 21:00:00 | 8,9 |
| 09.04.2022 | 22:00:00 | 8,9 |
| 09.04.2022 | 23:00:00 | 8,8 |
| 10.04.2022 | 00:00:00 | 8,8 |
| 10.04.2022 | 01:00:00 | 8,8 |
| 10.04.2022 | 02:00:00 | 8,7 |

|            |          |     |
|------------|----------|-----|
| 10.04.2022 | 03:00:00 | 8,7 |
| 10.04.2022 | 04:00:00 | 8,7 |
| 10.04.2022 | 05:00:00 | 8,6 |
| 10.04.2022 | 06:00:00 | 8,6 |
| 10.04.2022 | 07:00:00 | 8,6 |
| 10.04.2022 | 08:00:00 | 8,6 |
| 10.04.2022 | 09:00:00 | 8,7 |
| 10.04.2022 | 10:00:00 | 8,7 |
| 10.04.2022 | 11:00:00 | 8,8 |
| 10.04.2022 | 12:00:00 | 8,8 |
| 10.04.2022 | 13:00:00 | 8,9 |
| 10.04.2022 | 14:00:00 | 8,9 |
| 10.04.2022 | 15:00:00 | 8,8 |
| 10.04.2022 | 16:00:00 | 8,8 |
| 10.04.2022 | 17:00:00 | 8,7 |
| 10.04.2022 | 18:00:00 | 8,7 |
| 10.04.2022 | 19:00:00 | 8,6 |
| 10.04.2022 | 20:00:00 | 8,6 |
| 10.04.2022 | 21:00:00 | 8,5 |
| 10.04.2022 | 22:00:00 | 8,5 |
| 10.04.2022 | 23:00:00 | 8,4 |
| 11.04.2022 | 00:00:00 | 8,4 |
| 11.04.2022 | 01:00:00 | 8,3 |
| 11.04.2022 | 02:00:00 | 8,3 |
| 11.04.2022 | 03:00:00 | 8,3 |
| 11.04.2022 | 04:00:00 | 8,2 |
| 11.04.2022 | 05:00:00 | 8,2 |
| 11.04.2022 | 06:00:00 | 8,2 |
| 11.04.2022 | 07:00:00 | 8,2 |
| 11.04.2022 | 08:00:00 | 8,3 |
| 11.04.2022 | 09:00:00 | 8,4 |
| 11.04.2022 | 10:00:00 | 8,5 |
| 11.04.2022 | 11:00:00 | 8,7 |
| 11.04.2022 | 12:00:00 | 8,8 |
| 11.04.2022 | 13:00:00 | 8,9 |
| 11.04.2022 | 14:00:00 | 8,9 |
| 11.04.2022 | 15:00:00 | 9   |
| 11.04.2022 | 16:00:00 | 9   |
| 11.04.2022 | 17:00:00 | 9   |
| 11.04.2022 | 18:00:00 | 8,9 |
| 11.04.2022 | 19:00:00 | 8,9 |
| 11.04.2022 | 20:00:00 | 8,8 |
| 11.04.2022 | 21:00:00 | 8,7 |
| 11.04.2022 | 22:00:00 | 8,7 |
| 11.04.2022 | 23:00:00 | 8,7 |
| 12.04.2022 | 00:00:00 | 8,7 |

|            |          |     |
|------------|----------|-----|
| 12.04.2022 | 01:00:00 | 8,7 |
| 12.04.2022 | 02:00:00 | 8,6 |
| 12.04.2022 | 03:00:00 | 8,6 |
| 12.04.2022 | 04:00:00 | 8,6 |
| 12.04.2022 | 05:00:00 | 8,6 |
| 12.04.2022 | 06:00:00 | 8,6 |
| 12.04.2022 | 07:00:00 | 8,6 |
| 12.04.2022 | 08:00:00 | 8,6 |
| 12.04.2022 | 09:00:00 | 8,7 |
| 12.04.2022 | 10:00:00 | 8,9 |
| 12.04.2022 | 11:00:00 | 9   |
| 12.04.2022 | 12:00:00 | 9,1 |
| 12.04.2022 | 13:00:00 | 9,2 |
| 12.04.2022 | 14:00:00 | 9,2 |
| 12.04.2022 | 15:00:00 | 9,3 |
| 12.04.2022 | 16:00:00 | 9,3 |
| 12.04.2022 | 17:00:00 | 9,3 |
| 12.04.2022 | 18:00:00 | 9,3 |
| 12.04.2022 | 19:00:00 | 9,3 |
| 12.04.2022 | 20:00:00 | 9,3 |
| 12.04.2022 | 21:00:00 | 9,2 |
| 12.04.2022 | 22:00:00 | 9,2 |
| 12.04.2022 | 23:00:00 | 9,2 |
| 13.04.2022 | 00:00:00 | 9,2 |
| 13.04.2022 | 01:00:00 | 9,2 |
| 13.04.2022 | 02:00:00 | 9,1 |
| 13.04.2022 | 03:00:00 | 9,1 |
| 13.04.2022 | 04:00:00 | 9   |
| 13.04.2022 | 05:00:00 | 9   |
| 13.04.2022 | 06:00:00 | 9   |
| 13.04.2022 | 07:00:00 | 9   |
| 13.04.2022 | 08:00:00 | 9   |
| 13.04.2022 | 09:00:00 | 9,1 |
| 13.04.2022 | 10:00:00 | 9,2 |
| 13.04.2022 | 11:00:00 | 9,3 |
| 13.04.2022 | 12:00:00 | 9,5 |
| 13.04.2022 | 13:00:00 | 9,6 |
| 13.04.2022 | 14:00:00 | 9,6 |
| 13.04.2022 | 15:00:00 | 9,7 |
| 13.04.2022 | 16:00:00 | 9,7 |
| 13.04.2022 | 17:00:00 | 9,7 |
| 13.04.2022 | 18:00:00 | 9,7 |
| 13.04.2022 | 19:00:00 | 9,7 |
| 13.04.2022 | 20:00:00 | 9,6 |
| 13.04.2022 | 21:00:00 | 9,6 |
| 13.04.2022 | 22:00:00 | 9,6 |

|            |          |      |
|------------|----------|------|
| 13.04.2022 | 23:00:00 | 9,6  |
| 14.04.2022 | 00:00:00 | 9,6  |
| 14.04.2022 | 01:00:00 | 9,5  |
| 14.04.2022 | 02:00:00 | 9,5  |
| 14.04.2022 | 03:00:00 | 9,5  |
| 14.04.2022 | 04:00:00 | 9,5  |
| 14.04.2022 | 05:00:00 | 9,4  |
| 14.04.2022 | 06:00:00 | 9,4  |
| 14.04.2022 | 07:00:00 | 9,4  |
| 14.04.2022 | 08:00:00 | 9,4  |
| 14.04.2022 | 09:00:00 | 9,5  |
| 14.04.2022 | 10:00:00 | 9,6  |
| 14.04.2022 | 11:00:00 | 9,7  |
| 14.04.2022 | 12:00:00 | 9,8  |
| 14.04.2022 | 13:00:00 | 9,9  |
| 14.04.2022 | 14:00:00 | 10   |
| 14.04.2022 | 15:00:00 | 10   |
| 14.04.2022 | 16:00:00 | 10,1 |
| 14.04.2022 | 17:00:00 | 10,1 |
| 14.04.2022 | 18:00:00 | 10,1 |
| 14.04.2022 | 19:00:00 | 10,1 |
| 14.04.2022 | 20:00:00 | 10   |
| 14.04.2022 | 21:00:00 | 10   |
| 14.04.2022 | 22:00:00 | 10   |
| 14.04.2022 | 23:00:00 | 10   |
| 15.04.2022 | 00:00:00 | 10   |
| 15.04.2022 | 01:00:00 | 10   |
| 15.04.2022 | 02:00:00 | 10   |
| 15.04.2022 | 03:00:00 | 10   |
| 15.04.2022 | 04:00:00 | 9,9  |
| 15.04.2022 | 05:00:00 | 9,9  |
| 15.04.2022 | 06:00:00 | 9,9  |
| 15.04.2022 | 07:00:00 | 9,9  |
| 15.04.2022 | 08:00:00 | 9,8  |
| 15.04.2022 | 09:00:00 | 9,8  |
| 15.04.2022 | 10:00:00 | 9,8  |
| 15.04.2022 | 11:00:00 | 9,9  |
| 15.04.2022 | 12:00:00 | 10   |
| 15.04.2022 | 13:00:00 | 10,2 |
| 15.04.2022 | 14:00:00 | 10,2 |
| 15.04.2022 | 15:00:00 | 10,3 |
| 15.04.2022 | 16:00:00 | 10,3 |
| 15.04.2022 | 17:00:00 | 10,4 |
| 15.04.2022 | 18:00:00 | 10,4 |
| 15.04.2022 | 19:00:00 | 10,4 |
| 15.04.2022 | 20:00:00 | 10,4 |

|            |          |      |
|------------|----------|------|
| 15.04.2022 | 21:00:00 | 10,4 |
| 15.04.2022 | 22:00:00 | 10,4 |
| 15.04.2022 | 23:00:00 | 10,3 |
| 16.04.2022 | 00:00:00 | 10,2 |
| 16.04.2022 | 01:00:00 | 10,2 |
| 16.04.2022 | 02:00:00 | 10,2 |
| 16.04.2022 | 03:00:00 | 10,1 |
| 16.04.2022 | 04:00:00 | 10,1 |
| 16.04.2022 | 05:00:00 | 10,1 |
| 16.04.2022 | 06:00:00 | 10   |
| 16.04.2022 | 07:00:00 | 10   |
| 16.04.2022 | 08:00:00 | 10   |
| 16.04.2022 | 09:00:00 | 10   |
| 16.04.2022 | 10:00:00 | 10   |
| 16.04.2022 | 11:00:00 | 10   |
| 16.04.2022 | 12:00:00 | 10   |
| 16.04.2022 | 13:00:00 | 10   |
| 16.04.2022 | 14:00:00 | 10,1 |
| 16.04.2022 | 15:00:00 | 10,1 |
| 16.04.2022 | 16:00:00 | 10,1 |
| 16.04.2022 | 17:00:00 | 10,1 |
| 16.04.2022 | 18:00:00 | 10,2 |
| 16.04.2022 | 19:00:00 | 10,1 |
| 16.04.2022 | 20:00:00 | 10,1 |
| 16.04.2022 | 21:00:00 | 10,1 |
| 16.04.2022 | 22:00:00 | 10   |
| 16.04.2022 | 23:00:00 | 10   |
| 17.04.2022 | 00:00:00 | 9,9  |
| 17.04.2022 | 01:00:00 | 9,9  |
| 17.04.2022 | 02:00:00 | 9,9  |
| 17.04.2022 | 03:00:00 | 9,8  |
| 17.04.2022 | 04:00:00 | 9,8  |
| 17.04.2022 | 05:00:00 | 9,8  |
| 17.04.2022 | 06:00:00 | 9,7  |
| 17.04.2022 | 07:00:00 | 9,8  |
| 17.04.2022 | 08:00:00 | 9,8  |
| 17.04.2022 | 09:00:00 | 9,9  |
| 17.04.2022 | 10:00:00 | 10   |
| 17.04.2022 | 11:00:00 | 10,2 |
| 17.04.2022 | 12:00:00 | 10,4 |
| 17.04.2022 | 13:00:00 | 10,5 |
| 17.04.2022 | 14:00:00 | 10,5 |
| 17.04.2022 | 15:00:00 | 10,5 |
| 17.04.2022 | 16:00:00 | 10,6 |
| 17.04.2022 | 17:00:00 | 10,6 |
| 17.04.2022 | 18:00:00 | 10,5 |

|            |          |      |
|------------|----------|------|
| 17.04.2022 | 19:00:00 | 10,4 |
| 17.04.2022 | 20:00:00 | 10,4 |
| 17.04.2022 | 21:00:00 | 10,3 |
| 17.04.2022 | 22:00:00 | 10,2 |
| 17.04.2022 | 23:00:00 | 10,3 |
| 18.04.2022 | 00:00:00 | 10,2 |
| 18.04.2022 | 01:00:00 | 10,2 |
| 18.04.2022 | 02:00:00 | 10,2 |
| 18.04.2022 | 03:00:00 | 10,2 |
| 18.04.2022 | 04:00:00 | 10   |
| 18.04.2022 | 05:00:00 | 10,1 |
| 18.04.2022 | 06:00:00 | 10,1 |
| 18.04.2022 | 07:00:00 | 10,1 |
| 18.04.2022 | 08:00:00 | 10,1 |
| 18.04.2022 | 09:00:00 | 10,1 |
| 18.04.2022 | 10:00:00 | 10,1 |
| 18.04.2022 | 11:00:00 | 10,2 |
| 18.04.2022 | 12:00:00 | 10,3 |
| 18.04.2022 | 13:00:00 | 10,3 |
| 18.04.2022 | 14:00:00 | 10,4 |
| 18.04.2022 | 15:00:00 | 10,5 |
| 18.04.2022 | 16:00:00 | 10,6 |
| 18.04.2022 | 17:00:00 | 10,6 |
| 18.04.2022 | 18:00:00 | 10,6 |
| 18.04.2022 | 19:00:00 | 10,6 |
| 18.04.2022 | 20:00:00 | 10,5 |
| 18.04.2022 | 21:00:00 | 10,5 |
| 18.04.2022 | 22:00:00 | 10,4 |
| 18.04.2022 | 23:00:00 | 10,5 |
| 19.04.2022 | 00:00:00 | 10,5 |
| 19.04.2022 | 01:00:00 | 10,5 |
| 19.04.2022 | 02:00:00 | 10,4 |
| 19.04.2022 | 03:00:00 | 10,4 |
| 19.04.2022 | 04:00:00 | 10,5 |
| 19.04.2022 | 05:00:00 | 10,4 |
| 19.04.2022 | 06:00:00 | 10,4 |
| 19.04.2022 | 07:00:00 | 10,4 |
| 19.04.2022 | 08:00:00 | 10,3 |
| 19.04.2022 | 09:00:00 | 10,3 |
| 19.04.2022 | 10:00:00 | 10,4 |
| 19.04.2022 | 11:00:00 | 10,4 |
| 19.04.2022 | 12:00:00 | 10,3 |
| 19.04.2022 | 13:00:00 | 10,3 |
| 19.04.2022 | 14:00:00 | 10,2 |
| 19.04.2022 | 15:00:00 | 10,2 |
| 19.04.2022 | 16:00:00 | 10,2 |



|            |          |      |
|------------|----------|------|
| 19.04.2022 | 17:00:00 | 10,1 |
| 19.04.2022 | 18:00:00 | 10,1 |
| 19.04.2022 | 19:00:00 | 10   |
| 19.04.2022 | 20:00:00 | 10   |
| 19.04.2022 | 21:00:00 | 10   |
| 19.04.2022 | 22:00:00 | 10   |
| 19.04.2022 | 23:00:00 | 10   |
| 20.04.2022 | 00:00:00 | 10   |
| 20.04.2022 | 01:00:00 | 10   |
| 20.04.2022 | 02:00:00 | 10   |
| 20.04.2022 | 03:00:00 | 10   |
| 20.04.2022 | 04:00:00 | 10   |
| 20.04.2022 | 05:00:00 | 9,9  |
| 20.04.2022 | 06:00:00 | 10   |
| 20.04.2022 | 07:00:00 | 10,1 |
| 20.04.2022 | 08:00:00 | 10,2 |
| 20.04.2022 | 09:00:00 | 10,3 |
| 20.04.2022 | 10:00:00 | 10,5 |
| 20.04.2022 | 11:00:00 | 10,6 |
| 20.04.2022 | 12:00:00 | 10,8 |
| 20.04.2022 | 13:00:00 | 10,7 |
| 20.04.2022 | 14:00:00 | 10,7 |
| 20.04.2022 | 15:00:00 | 10,8 |
| 20.04.2022 | 16:00:00 | 10,8 |
| 20.04.2022 | 17:00:00 | 10,8 |
| 20.04.2022 | 18:00:00 | 10,7 |
| 20.04.2022 | 19:00:00 | 10,7 |
| 20.04.2022 | 20:00:00 | 10,6 |
| 20.04.2022 | 21:00:00 | 10,5 |
| 20.04.2022 | 22:00:00 | 10,5 |
| 20.04.2022 | 23:00:00 | 10,5 |
| 21.04.2022 | 00:00:00 | 10,5 |
| 21.04.2022 | 01:00:00 | 10,4 |
| 21.04.2022 | 02:00:00 | 10,5 |
| 21.04.2022 | 03:00:00 | 10,4 |
| 21.04.2022 | 04:00:00 | 10,4 |
| 21.04.2022 | 05:00:00 | 10,5 |
| 21.04.2022 | 06:00:00 | 10,5 |
| 21.04.2022 | 07:00:00 | 10,5 |
| 21.04.2022 | 08:00:00 | 10,6 |
| 21.04.2022 | 09:00:00 | 10,7 |
| 21.04.2022 | 10:00:00 | 10,9 |
| 21.04.2022 | 11:00:00 | 11   |
| 21.04.2022 | 12:00:00 | 11,2 |
| 21.04.2022 | 13:00:00 | 11,3 |
| 21.04.2022 | 14:00:00 | 11,2 |

|            |          |      |
|------------|----------|------|
| 21.04.2022 | 15:00:00 | 11,3 |
| 21.04.2022 | 16:00:00 | 11,2 |
| 21.04.2022 | 17:00:00 | 11,2 |
| 21.04.2022 | 18:00:00 | 11,1 |
| 21.04.2022 | 19:00:00 | 11,1 |
| 21.04.2022 | 20:00:00 | 11   |
| 21.04.2022 | 21:00:00 | 10,9 |
| 21.04.2022 | 22:00:00 | 10,9 |
| 21.04.2022 | 23:00:00 | 10,9 |
| 22.04.2022 | 00:00:00 | 10,9 |
| 22.04.2022 | 01:00:00 | 10,9 |
| 22.04.2022 | 02:00:00 | 10,9 |
| 22.04.2022 | 03:00:00 | 10,9 |
| 22.04.2022 | 04:00:00 | 10,9 |
| 22.04.2022 | 05:00:00 | 11   |
| 22.04.2022 | 06:00:00 | 11   |
| 22.04.2022 | 07:00:00 | 11   |
| 22.04.2022 | 08:00:00 | 11   |
| 22.04.2022 | 09:00:00 | 11   |
| 22.04.2022 | 10:00:00 | 11   |
| 22.04.2022 | 11:00:00 | 11   |
| 22.04.2022 | 12:00:00 | 10,9 |
| 22.04.2022 | 13:00:00 | 10,9 |
| 22.04.2022 | 14:00:00 | 10,9 |
| 22.04.2022 | 15:00:00 | 10,8 |
| 22.04.2022 | 16:00:00 | 10,8 |
| 22.04.2022 | 17:00:00 | 10,8 |
| 22.04.2022 | 18:00:00 | 10,7 |
| 22.04.2022 | 19:00:00 | 10,7 |
| 22.04.2022 | 20:00:00 | 10,7 |
| 22.04.2022 | 21:00:00 | 10,7 |
| 22.04.2022 | 22:00:00 | 10,7 |
| 22.04.2022 | 23:00:00 | 10,7 |
| 23.04.2022 | 00:00:00 | 10,7 |
| 23.04.2022 | 01:00:00 | 10,8 |
| 23.04.2022 | 02:00:00 | 10,8 |
| 23.04.2022 | 03:00:00 | 10,8 |
| 23.04.2022 | 04:00:00 | 10,8 |
| 23.04.2022 | 05:00:00 | 10,8 |
| 23.04.2022 | 06:00:00 | 10,8 |
| 23.04.2022 | 07:00:00 | 10,8 |
| 23.04.2022 | 08:00:00 | 10,7 |
| 23.04.2022 | 09:00:00 | 10,7 |
| 23.04.2022 | 10:00:00 | 10,7 |
| 23.04.2022 | 11:00:00 | 10,8 |
| 23.04.2022 | 12:00:00 | 10,8 |

|            |          |      |
|------------|----------|------|
| 23.04.2022 | 13:00:00 | 11   |
| 23.04.2022 | 14:00:00 | 11   |
| 23.04.2022 | 15:00:00 | 11   |
| 23.04.2022 | 16:00:00 | 10,9 |
| 23.04.2022 | 17:00:00 | 10,9 |
| 23.04.2022 | 18:00:00 | 10,8 |
| 23.04.2022 | 19:00:00 | 10,8 |
| 23.04.2022 | 20:00:00 | 10,7 |
| 23.04.2022 | 21:00:00 | 10,7 |
| 23.04.2022 | 22:00:00 | 10,6 |
| 23.04.2022 | 23:00:00 | 10,6 |
| 24.04.2022 | 00:00:00 | 10,6 |
| 24.04.2022 | 01:00:00 | 10,6 |
| 24.04.2022 | 02:00:00 | 10,6 |
| 24.04.2022 | 03:00:00 | 10,7 |
| 24.04.2022 | 04:00:00 | 10,7 |
| 24.04.2022 | 05:00:00 | 10,7 |
| 24.04.2022 | 06:00:00 | 10,7 |
| 24.04.2022 | 07:00:00 | 10,8 |
| 24.04.2022 | 08:00:00 | 10,8 |
| 24.04.2022 | 09:00:00 | 10,9 |
| 24.04.2022 | 10:00:00 | 11   |
| 24.04.2022 | 11:00:00 | 11   |
| 24.04.2022 | 12:00:00 | 11   |
| 24.04.2022 | 13:00:00 | 11,1 |
| 24.04.2022 | 14:00:00 | 11,1 |
| 24.04.2022 | 15:00:00 | 11,2 |
| 24.04.2022 | 16:00:00 | 11,2 |
| 24.04.2022 | 17:00:00 | 11,2 |
| 24.04.2022 | 18:00:00 | 11,1 |
| 24.04.2022 | 19:00:00 | 11,1 |
| 24.04.2022 | 20:00:00 | 11   |
| 24.04.2022 | 21:00:00 | 10,9 |
| 24.04.2022 | 22:00:00 | 10,9 |
| 24.04.2022 | 23:00:00 | 10,8 |
| 25.04.2022 | 00:00:00 | 10,8 |
| 25.04.2022 | 01:00:00 | 10,7 |
| 25.04.2022 | 02:00:00 | 10,7 |
| 25.04.2022 | 03:00:00 | 10,7 |
| 25.04.2022 | 04:00:00 | 10,7 |
| 25.04.2022 | 05:00:00 | 10,8 |
| 25.04.2022 | 06:00:00 | 10,8 |
| 25.04.2022 | 07:00:00 | 10,9 |
| 25.04.2022 | 08:00:00 | 11   |
| 25.04.2022 | 09:00:00 | 11,1 |
| 25.04.2022 | 10:00:00 | 11,2 |

|            |          |      |
|------------|----------|------|
| 25.04.2022 | 11:00:00 | 11,5 |
| 25.04.2022 | 12:00:00 | 11,6 |
| 25.04.2022 | 13:00:00 | 11,7 |
| 25.04.2022 | 14:00:00 | 11,6 |
| 25.04.2022 | 15:00:00 | 11,5 |
| 25.04.2022 | 16:00:00 | 11,4 |
| 25.04.2022 | 17:00:00 | 11,4 |
| 25.04.2022 | 18:00:00 | 11,3 |
| 25.04.2022 | 19:00:00 | 11,2 |
| 25.04.2022 | 20:00:00 | 11,1 |
| 25.04.2022 | 21:00:00 | 11   |
| 25.04.2022 | 22:00:00 | 11   |
| 25.04.2022 | 23:00:00 | 11   |
| 26.04.2022 | 00:00:00 | 11   |
| 26.04.2022 | 01:00:00 | 11   |
| 26.04.2022 | 02:00:00 | 10,9 |
| 26.04.2022 | 03:00:00 | 10,9 |
| 26.04.2022 | 04:00:00 | 10,9 |
| 26.04.2022 | 05:00:00 | 11   |
| 26.04.2022 | 06:00:00 | 11,1 |
| 26.04.2022 | 07:00:00 | 11,1 |
| 26.04.2022 | 08:00:00 | 11,2 |
| 26.04.2022 | 09:00:00 | 11,3 |
| 26.04.2022 | 10:00:00 | 11,3 |
| 26.04.2022 | 11:00:00 | 11,3 |
| 26.04.2022 | 12:00:00 | 11,4 |
| 26.04.2022 | 13:00:00 | 11,5 |
| 26.04.2022 | 14:00:00 | 11,6 |
| 26.04.2022 | 15:00:00 | 11,7 |
| 26.04.2022 | 16:00:00 | 11,7 |
| 26.04.2022 | 17:00:00 | 11,7 |
| 26.04.2022 | 18:00:00 | 11,7 |
| 26.04.2022 | 19:00:00 | 11,6 |
| 26.04.2022 | 20:00:00 | 11,6 |
| 26.04.2022 | 21:00:00 | 11,5 |
| 26.04.2022 | 22:00:00 | 11,5 |
| 26.04.2022 | 23:00:00 | 11,5 |
| 27.04.2022 | 00:00:00 | 11,5 |
| 27.04.2022 | 01:00:00 | 11,5 |
| 27.04.2022 | 02:00:00 | 11,5 |
| 27.04.2022 | 03:00:00 | 11,5 |
| 27.04.2022 | 04:00:00 | 11,5 |
| 27.04.2022 | 05:00:00 | 11,6 |
| 27.04.2022 | 06:00:00 | 11,6 |
| 27.04.2022 | 07:00:00 | 11,6 |
| 27.04.2022 | 08:00:00 | 11,6 |

|            |          |      |
|------------|----------|------|
| 27.04.2022 | 09:00:00 | 11,6 |
| 27.04.2022 | 10:00:00 | 11,6 |
| 27.04.2022 | 11:00:00 | 11,7 |
| 27.04.2022 | 12:00:00 | 11,7 |
| 27.04.2022 | 13:00:00 | 11,7 |
| 27.04.2022 | 14:00:00 | 11,7 |
| 27.04.2022 | 15:00:00 | 11,7 |
| 27.04.2022 | 16:00:00 | 11,7 |
| 27.04.2022 | 17:00:00 | 11,7 |
| 27.04.2022 | 18:00:00 | 11,7 |
| 27.04.2022 | 19:00:00 | 11,7 |
| 27.04.2022 | 20:00:00 | 11,7 |
| 27.04.2022 | 21:00:00 | 11,7 |
| 27.04.2022 | 22:00:00 | 11,7 |
| 27.04.2022 | 23:00:00 | 11,7 |
| 28.04.2022 | 00:00:00 | 11,7 |
| 28.04.2022 | 01:00:00 | 11,7 |
| 28.04.2022 | 02:00:00 | 11,6 |
| 28.04.2022 | 03:00:00 | 11,5 |
| 28.04.2022 | 04:00:00 | 11,4 |
| 28.04.2022 | 05:00:00 | 11,4 |
| 28.04.2022 | 06:00:00 | 11,4 |
| 28.04.2022 | 07:00:00 | 11,4 |
| 28.04.2022 | 08:00:00 | 11,5 |
| 28.04.2022 | 09:00:00 | 11,7 |
| 28.04.2022 | 10:00:00 | 11,8 |
| 28.04.2022 | 11:00:00 | 11,9 |
| 28.04.2022 | 12:00:00 | 11,8 |
| 28.04.2022 | 13:00:00 | 11,9 |
| 28.04.2022 | 14:00:00 | 11,9 |
| 28.04.2022 | 15:00:00 | 11,9 |
| 28.04.2022 | 16:00:00 | 11,9 |
| 28.04.2022 | 17:00:00 | 11,9 |
| 28.04.2022 | 18:00:00 | 11,8 |
| 28.04.2022 | 19:00:00 | 11,8 |
| 28.04.2022 | 20:00:00 | 11,7 |
| 28.04.2022 | 21:00:00 | 11,7 |
| 28.04.2022 | 22:00:00 | 11,7 |
| 28.04.2022 | 23:00:00 | 11,6 |
| 29.04.2022 | 00:00:00 | 11,6 |
| 29.04.2022 | 01:00:00 | 11,6 |
| 29.04.2022 | 02:00:00 | 11,5 |
| 29.04.2022 | 03:00:00 | 11,4 |
| 29.04.2022 | 04:00:00 | 11,4 |
| 29.04.2022 | 05:00:00 | 11,3 |
| 29.04.2022 | 06:00:00 | 11,4 |

|            |          |      |
|------------|----------|------|
| 29.04.2022 | 07:00:00 | 11,4 |
| 29.04.2022 | 08:00:00 | 11,5 |
| 29.04.2022 | 09:00:00 | 11,7 |
| 29.04.2022 | 10:00:00 | 11,8 |
| 29.04.2022 | 11:00:00 | 12   |
| 29.04.2022 | 12:00:00 | 11,9 |
| 29.04.2022 | 13:00:00 | 12,1 |
| 29.04.2022 | 14:00:00 | 12,1 |
| 29.04.2022 | 15:00:00 | 12,1 |
| 29.04.2022 | 16:00:00 | 12,1 |
| 29.04.2022 | 17:00:00 | 12,1 |
| 29.04.2022 | 18:00:00 | 12   |
| 29.04.2022 | 19:00:00 | 12   |
| 29.04.2022 | 20:00:00 | 11,9 |
| 29.04.2022 | 21:00:00 | 11,8 |
| 29.04.2022 | 22:00:00 | 11,8 |
| 29.04.2022 | 23:00:00 | 11,8 |
| 30.04.2022 | 00:00:00 | 11,8 |
| 30.04.2022 | 01:00:00 | 11,7 |
| 30.04.2022 | 02:00:00 | 11,8 |
| 30.04.2022 | 03:00:00 | 11,7 |
| 30.04.2022 | 04:00:00 | 11,7 |
| 30.04.2022 | 05:00:00 | 11,7 |
| 30.04.2022 | 06:00:00 | 11,7 |
| 30.04.2022 | 07:00:00 | 11,7 |
| 30.04.2022 | 08:00:00 | 11,8 |
| 30.04.2022 | 09:00:00 | 11,9 |
| 30.04.2022 | 10:00:00 | 12   |
| 30.04.2022 | 11:00:00 | 12,2 |
| 30.04.2022 | 12:00:00 | 12,3 |
| 30.04.2022 | 13:00:00 | 12,4 |
| 30.04.2022 | 14:00:00 | 12,4 |
| 30.04.2022 | 15:00:00 | 12,4 |
| 30.04.2022 | 16:00:00 | 12,4 |
| 30.04.2022 | 17:00:00 | 12,3 |
| 30.04.2022 | 18:00:00 | 12,3 |
| 30.04.2022 | 19:00:00 | 12,2 |
| 30.04.2022 | 20:00:00 | 12,1 |
| 30.04.2022 | 21:00:00 | 12,1 |
| 30.04.2022 | 22:00:00 | 12,1 |
| 30.04.2022 | 23:00:00 | 12,1 |
| 01.05.2022 | 00:00:00 | 12,1 |
| 01.05.2022 | 01:00:00 | 12,2 |
| 01.05.2022 | 02:00:00 | 12,2 |
| 01.05.2022 | 03:00:00 | 12,2 |
| 01.05.2022 | 04:00:00 | 12,2 |

|            |          |      |
|------------|----------|------|
| 01.05.2022 | 05:00:00 | 12,2 |
| 01.05.2022 | 06:00:00 | 12,3 |
| 01.05.2022 | 07:00:00 | 12,3 |
| 01.05.2022 | 08:00:00 | 12,4 |
| 01.05.2022 | 09:00:00 | 12,5 |
| 01.05.2022 | 10:00:00 | 12,5 |
| 01.05.2022 | 11:00:00 | 12,5 |
| 01.05.2022 | 12:00:00 | 12,5 |
| 01.05.2022 | 13:00:00 | 12,5 |
| 01.05.2022 | 14:00:00 | 12,5 |
| 01.05.2022 | 15:00:00 | 12,4 |
| 01.05.2022 | 16:00:00 | 12,4 |
| 01.05.2022 | 17:00:00 | 12,4 |
| 01.05.2022 | 18:00:00 | 12,4 |
| 01.05.2022 | 19:00:00 | 12,3 |
| 01.05.2022 | 20:00:00 | 12,3 |
| 01.05.2022 | 21:00:00 | 12,3 |
| 01.05.2022 | 22:00:00 | 12,3 |
| 01.05.2022 | 23:00:00 | 12,3 |
| 02.05.2022 | 00:00:00 | 12,3 |
| 02.05.2022 | 01:00:00 | 12,4 |
| 02.05.2022 | 02:00:00 | 12,4 |
| 02.05.2022 | 03:00:00 | 12,4 |
| 02.05.2022 | 04:00:00 | 12,4 |
| 02.05.2022 | 05:00:00 | 12,4 |
| 02.05.2022 | 06:00:00 | 12,5 |
| 02.05.2022 | 07:00:00 | 12,6 |
| 02.05.2022 | 08:00:00 | 12,6 |
| 02.05.2022 | 09:00:00 | 12,7 |
| 02.05.2022 | 10:00:00 | 12,8 |
| 02.05.2022 | 11:00:00 | 12,9 |
| 02.05.2022 | 12:00:00 | 13,1 |
| 02.05.2022 | 13:00:00 | 13,2 |
| 02.05.2022 | 14:00:00 | 13,2 |
| 02.05.2022 | 15:00:00 | 13,2 |
| 02.05.2022 | 16:00:00 | 13,1 |
| 02.05.2022 | 17:00:00 | 13,1 |
| 02.05.2022 | 18:00:00 | 13   |
| 02.05.2022 | 19:00:00 | 12,9 |
| 02.05.2022 | 20:00:00 | 12,9 |
| 02.05.2022 | 21:00:00 | 12,8 |
| 02.05.2022 | 22:00:00 | 12,8 |
| 02.05.2022 | 23:00:00 | 12,7 |
| 03.05.2022 | 00:00:00 | 12,7 |
| 03.05.2022 | 01:00:00 | 12,8 |
| 03.05.2022 | 02:00:00 | 12,8 |

|            |          |      |
|------------|----------|------|
| 03.05.2022 | 03:00:00 | 12,8 |
| 03.05.2022 | 04:00:00 | 12,8 |
| 03.05.2022 | 05:00:00 | 12,8 |
| 03.05.2022 | 06:00:00 | 12,8 |
| 03.05.2022 | 07:00:00 | 12,8 |
| 03.05.2022 | 08:00:00 | 12,9 |
| 03.05.2022 | 09:00:00 | 13,1 |
| 03.05.2022 | 10:00:00 | 13,2 |
| 03.05.2022 | 11:00:00 | 13,4 |
| 03.05.2022 | 12:00:00 | 13,5 |
| 03.05.2022 | 13:00:00 | 13,6 |
| 03.05.2022 | 14:00:00 | 13,5 |
| 03.05.2022 | 15:00:00 | 13,5 |
| 03.05.2022 | 16:00:00 | 13,5 |
| 03.05.2022 | 17:00:00 | 13,5 |
| 03.05.2022 | 18:00:00 | 13,4 |
| 03.05.2022 | 19:00:00 | 13,3 |
| 03.05.2022 | 20:00:00 | 13,2 |
| 03.05.2022 | 21:00:00 | 13,2 |
| 03.05.2022 | 22:00:00 | 13,1 |
| 03.05.2022 | 23:00:00 | 13,1 |
| 04.05.2022 | 00:00:00 | 13,1 |
| 04.05.2022 | 01:00:00 | 13,1 |
| 04.05.2022 | 02:00:00 | 13,2 |
| 04.05.2022 | 03:00:00 | 13,2 |
| 04.05.2022 | 04:00:00 | 13,2 |
| 04.05.2022 | 05:00:00 | 13,2 |
| 04.05.2022 | 06:00:00 | 13,3 |
| 04.05.2022 | 07:00:00 | 13,3 |
| 04.05.2022 | 08:00:00 | 13,4 |
| 04.05.2022 | 09:00:00 | 13,5 |
| 04.05.2022 | 10:00:00 | 13,6 |
| 04.05.2022 | 11:00:00 | 13,7 |
| 04.05.2022 | 12:00:00 | 13,8 |
| 04.05.2022 | 13:00:00 | 13,9 |
| 04.05.2022 | 14:00:00 | 13,7 |
| 04.05.2022 | 15:00:00 | 13,7 |
| 04.05.2022 | 16:00:00 | 13,6 |
| 04.05.2022 | 17:00:00 | 13,5 |
| 04.05.2022 | 18:00:00 | 13,4 |
| 04.05.2022 | 19:00:00 | 13,3 |
| 04.05.2022 | 20:00:00 | 13,3 |
| 04.05.2022 | 21:00:00 | 13,2 |
| 04.05.2022 | 22:00:00 | 13,2 |
| 04.05.2022 | 23:00:00 | 13,2 |
| 05.05.2022 | 00:00:00 | 13,3 |



|            |          |      |
|------------|----------|------|
| 05.05.2022 | 01:00:00 | 13,3 |
| 05.05.2022 | 02:00:00 | 13,3 |
| 05.05.2022 | 03:00:00 | 13,4 |
| 05.05.2022 | 04:00:00 | 13,4 |
| 05.05.2022 | 05:00:00 | 13,5 |
| 05.05.2022 | 06:00:00 | 13,5 |
| 05.05.2022 | 07:00:00 | 13,5 |
| 05.05.2022 | 08:00:00 | 13,7 |
| 05.05.2022 | 09:00:00 | 13,7 |
| 05.05.2022 | 10:00:00 | 13,8 |
| 05.05.2022 | 11:00:00 | 13,8 |
| 05.05.2022 | 12:00:00 | 14,1 |
| 05.05.2022 | 13:00:00 | 13,9 |
| 05.05.2022 | 14:00:00 | 13,9 |
| 05.05.2022 | 15:00:00 | 14   |
| 05.05.2022 | 16:00:00 | 13,9 |
| 05.05.2022 | 17:00:00 | 13,9 |
| 05.05.2022 | 18:00:00 | 13,9 |
| 05.05.2022 | 19:00:00 | 13,9 |
| 05.05.2022 | 20:00:00 | 13,8 |
| 05.05.2022 | 21:00:00 | 13,8 |
| 05.05.2022 | 22:00:00 | 13,7 |
| 05.05.2022 | 23:00:00 | 13,8 |
| 06.05.2022 | 00:00:00 | 13,8 |
| 06.05.2022 | 01:00:00 | 13,8 |
| 06.05.2022 | 02:00:00 | 13,8 |
| 06.05.2022 | 03:00:00 | 13,8 |
| 06.05.2022 | 04:00:00 | 13,8 |
| 06.05.2022 | 05:00:00 | 13,9 |
| 06.05.2022 | 06:00:00 | 13,9 |
| 06.05.2022 | 07:00:00 | 13,9 |
| 06.05.2022 | 08:00:00 | 13,9 |
| 06.05.2022 | 09:00:00 | 13,9 |
| 06.05.2022 | 10:00:00 | 13,9 |
| 06.05.2022 | 11:00:00 | 14   |
| 06.05.2022 | 12:00:00 | 14   |
| 06.05.2022 | 13:00:00 | 14   |
| 06.05.2022 | 14:00:00 | 14   |
| 06.05.2022 | 15:00:00 | 14   |
| 06.05.2022 | 16:00:00 | 14   |
| 06.05.2022 | 17:00:00 | 14   |
| 06.05.2022 | 18:00:00 | 14   |
| 06.05.2022 | 19:00:00 | 14   |
| 06.05.2022 | 20:00:00 | 14   |
| 06.05.2022 | 21:00:00 | 14   |
| 06.05.2022 | 22:00:00 | 14   |

|            |          |      |
|------------|----------|------|
| 06.05.2022 | 23:00:00 | 14   |
| 07.05.2022 | 00:00:00 | 14   |
| 07.05.2022 | 01:00:00 | 14   |
| 07.05.2022 | 02:00:00 | 14   |
| 07.05.2022 | 03:00:00 | 14,1 |
| 07.05.2022 | 04:00:00 | 14,1 |
| 07.05.2022 | 05:00:00 | 14   |
| 07.05.2022 | 06:00:00 | 14   |
| 07.05.2022 | 07:00:00 | 14   |
| 07.05.2022 | 08:00:00 | 14   |
| 07.05.2022 | 09:00:00 | 14   |
| 07.05.2022 | 10:00:00 | 14,1 |
| 07.05.2022 | 11:00:00 | 14,2 |
| 07.05.2022 | 12:00:00 | 14,1 |
| 07.05.2022 | 13:00:00 | 14,2 |
| 07.05.2022 | 14:00:00 | 14,2 |
| 07.05.2022 | 15:00:00 | 14,2 |
| 07.05.2022 | 16:00:00 | 14,2 |
| 07.05.2022 | 17:00:00 | 14,2 |
| 07.05.2022 | 18:00:00 | 14,1 |
| 07.05.2022 | 19:00:00 | 14   |
| 07.05.2022 | 20:00:00 | 14   |
| 07.05.2022 | 21:00:00 | 14   |
| 07.05.2022 | 22:00:00 | 14   |
| 07.05.2022 | 23:00:00 | 14   |
| 08.05.2022 | 00:00:00 | 14,1 |
| 08.05.2022 | 01:00:00 | 14,1 |
| 08.05.2022 | 02:00:00 | 14   |
| 08.05.2022 | 03:00:00 | 14   |
| 08.05.2022 | 04:00:00 | 14   |
| 08.05.2022 | 05:00:00 | 14   |
| 08.05.2022 | 06:00:00 | 14   |
| 08.05.2022 | 07:00:00 | 14   |
| 08.05.2022 | 08:00:00 | 14   |
| 08.05.2022 | 09:00:00 | 14   |
| 08.05.2022 | 10:00:00 | 14   |
| 08.05.2022 | 11:00:00 | 14,1 |
| 08.05.2022 | 12:00:00 | 14,1 |
| 08.05.2022 | 13:00:00 | 14,1 |
| 08.05.2022 | 14:00:00 | 14,2 |
| 08.05.2022 | 15:00:00 | 14,2 |
| 08.05.2022 | 16:00:00 | 14,2 |
| 08.05.2022 | 17:00:00 | 14,2 |
| 08.05.2022 | 18:00:00 | 14,2 |
| 08.05.2022 | 19:00:00 | 14,2 |
| 08.05.2022 | 20:00:00 | 14,2 |

|            |          |      |
|------------|----------|------|
| 08.05.2022 | 21:00:00 | 14,1 |
| 08.05.2022 | 22:00:00 | 14,1 |
| 08.05.2022 | 23:00:00 | 14,1 |
| 09.05.2022 | 00:00:00 | 14,1 |
| 09.05.2022 | 01:00:00 | 14   |
| 09.05.2022 | 02:00:00 | 14   |
| 09.05.2022 | 03:00:00 | 14   |
| 09.05.2022 | 04:00:00 | 14   |
| 09.05.2022 | 05:00:00 | 14   |
| 09.05.2022 | 06:00:00 | 14   |
| 09.05.2022 | 07:00:00 | 14   |
| 09.05.2022 | 08:00:00 | 14   |
| 09.05.2022 | 09:00:00 | 14,1 |
| 09.05.2022 | 10:00:00 | 14,3 |
| 09.05.2022 | 11:00:00 | 14,4 |
| 09.05.2022 | 12:00:00 | 14,5 |
| 09.05.2022 | 13:00:00 | 14,5 |
| 09.05.2022 | 14:00:00 | 14,6 |
| 09.05.2022 | 15:00:00 | 14,6 |
| 09.05.2022 | 16:00:00 | 14,6 |
| 09.05.2022 | 17:00:00 | 14,6 |
| 09.05.2022 | 18:00:00 | 14,6 |
| 09.05.2022 | 19:00:00 | 14,6 |
| 09.05.2022 | 20:00:00 | 14,5 |
| 09.05.2022 | 21:00:00 | 14,5 |
| 09.05.2022 | 22:00:00 | 14,4 |
| 09.05.2022 | 23:00:00 | 14,4 |
| 10.05.2022 | 00:00:00 | 14,4 |
| 10.05.2022 | 01:00:00 | 14,4 |
| 10.05.2022 | 02:00:00 | 14,3 |
| 10.05.2022 | 03:00:00 | 14,3 |
| 10.05.2022 | 04:00:00 | 14,3 |
| 10.05.2022 | 05:00:00 | 14,3 |
| 10.05.2022 | 06:00:00 | 14,3 |
| 10.05.2022 | 07:00:00 | 14,4 |
| 10.05.2022 | 08:00:00 | 14,5 |
| 10.05.2022 | 09:00:00 | 14,6 |
| 10.05.2022 | 10:00:00 | 14,7 |
| 10.05.2022 | 11:00:00 | 14,8 |
| 10.05.2022 | 12:00:00 | 15   |
| 10.05.2022 | 13:00:00 | 15,1 |
| 10.05.2022 | 14:00:00 | 15   |
| 10.05.2022 | 15:00:00 | 15,1 |
| 10.05.2022 | 16:00:00 | 15,1 |
| 10.05.2022 | 17:00:00 | 15,2 |
| 10.05.2022 | 18:00:00 | 15,1 |

|            |          |      |
|------------|----------|------|
| 10.05.2022 | 19:00:00 | 15,1 |
| 10.05.2022 | 20:00:00 | 15   |
| 10.05.2022 | 21:00:00 | 15   |
| 10.05.2022 | 22:00:00 | 14,9 |
| 10.05.2022 | 23:00:00 | 14,9 |
| 11.05.2022 | 00:00:00 | 14,9 |
| 11.05.2022 | 01:00:00 | 14,8 |
| 11.05.2022 | 02:00:00 | 14,8 |
| 11.05.2022 | 03:00:00 | 14,8 |
| 11.05.2022 | 04:00:00 | 14,7 |
| 11.05.2022 | 05:00:00 | 14,7 |
| 11.05.2022 | 06:00:00 | 14,7 |
| 11.05.2022 | 07:00:00 | 14,7 |
| 11.05.2022 | 08:00:00 | 14,9 |
| 11.05.2022 | 09:00:00 | 15   |
| 11.05.2022 | 10:00:00 | 15,1 |
| 11.05.2022 | 11:00:00 | 15,2 |
| 11.05.2022 | 12:00:00 | 15,3 |
| 11.05.2022 | 13:00:00 | 15,5 |
| 11.05.2022 | 14:00:00 | 15,4 |
| 11.05.2022 | 15:00:00 | 15,5 |
| 11.05.2022 | 16:00:00 | 15,5 |
| 11.05.2022 | 17:00:00 | 15,5 |
| 11.05.2022 | 18:00:00 | 15,5 |
| 11.05.2022 | 19:00:00 | 15,5 |
| 11.05.2022 | 20:00:00 | 15,4 |
| 11.05.2022 | 21:00:00 | 15,4 |
| 11.05.2022 | 22:00:00 | 15,3 |
| 11.05.2022 | 23:00:00 | 15,2 |
| 12.05.2022 | 00:00:00 | 15,1 |
| 12.05.2022 | 01:00:00 | 15,1 |
| 12.05.2022 | 02:00:00 | 15   |
| 12.05.2022 | 03:00:00 | 15   |
| 12.05.2022 | 04:00:00 | 14,9 |
| 12.05.2022 | 05:00:00 | 14,9 |
| 12.05.2022 | 06:00:00 | 14,9 |
| 12.05.2022 | 07:00:00 | 14,9 |
| 12.05.2022 | 08:00:00 | 15   |
| 12.05.2022 | 09:00:00 | 15,1 |
| 12.05.2022 | 10:00:00 | 15,2 |
| 12.05.2022 | 11:00:00 | 15,3 |
| 12.05.2022 | 12:00:00 | 15,4 |
| 12.05.2022 | 13:00:00 | 15,5 |
| 12.05.2022 | 14:00:00 | 15,5 |
| 12.05.2022 | 15:00:00 | 15,6 |
| 12.05.2022 | 16:00:00 | 15,7 |

|            |          |      |
|------------|----------|------|
| 12.05.2022 | 17:00:00 | 15,7 |
| 12.05.2022 | 18:00:00 | 15,7 |
| 12.05.2022 | 19:00:00 | 15,7 |
| 12.05.2022 | 20:00:00 | 15,7 |
| 12.05.2022 | 21:00:00 | 15,7 |
| 12.05.2022 | 22:00:00 | 15,7 |
| 12.05.2022 | 23:00:00 | 15,7 |
| 13.05.2022 | 00:00:00 | 15,7 |
| 13.05.2022 | 01:00:00 | 15,6 |
| 13.05.2022 | 02:00:00 | 15,6 |
| 13.05.2022 | 03:00:00 | 15,5 |
| 13.05.2022 | 04:00:00 | 15,5 |
| 13.05.2022 | 05:00:00 | 15,4 |
| 13.05.2022 | 06:00:00 | 15,4 |
| 13.05.2022 | 07:00:00 | 15,3 |
| 13.05.2022 | 08:00:00 | 15,3 |
| 13.05.2022 | 09:00:00 | 15,2 |
| 13.05.2022 | 10:00:00 | 15,3 |
| 13.05.2022 | 11:00:00 | 15,4 |
| 13.05.2022 | 12:00:00 | 15,3 |
| 13.05.2022 | 13:00:00 | 15,5 |
| 13.05.2022 | 14:00:00 | 15,6 |
| 13.05.2022 | 15:00:00 | 15,8 |
| 13.05.2022 | 16:00:00 | 15,9 |
| 13.05.2022 | 17:00:00 | 15,9 |
| 13.05.2022 | 18:00:00 | 15,9 |
| 13.05.2022 | 19:00:00 | 15,9 |
| 13.05.2022 | 20:00:00 | 15,8 |
| 13.05.2022 | 21:00:00 | 15,8 |
| 13.05.2022 | 22:00:00 | 15,7 |
| 13.05.2022 | 23:00:00 | 15,7 |
| 14.05.2022 | 00:00:00 | 15,7 |
| 14.05.2022 | 01:00:00 | 15,6 |
| 14.05.2022 | 02:00:00 | 15,6 |
| 14.05.2022 | 03:00:00 | 15,5 |
| 14.05.2022 | 04:00:00 | 15,4 |
| 14.05.2022 | 05:00:00 | 15,4 |
| 14.05.2022 | 06:00:00 | 15,3 |
| 14.05.2022 | 07:00:00 | 15,4 |
| 14.05.2022 | 08:00:00 | 15,5 |
| 14.05.2022 | 09:00:00 | 15,6 |
| 14.05.2022 | 10:00:00 | 15,7 |
| 14.05.2022 | 11:00:00 | 15,8 |
| 14.05.2022 | 12:00:00 | 16   |
| 14.05.2022 | 13:00:00 | 16,1 |
| 14.05.2022 | 14:00:00 | 16,1 |

|            |          |      |
|------------|----------|------|
| 14.05.2022 | 15:00:00 | 16,1 |
| 14.05.2022 | 16:00:00 | 16,2 |
| 14.05.2022 | 17:00:00 | 16,3 |
| 14.05.2022 | 18:00:00 | 16,3 |
| 14.05.2022 | 19:00:00 | 16,3 |
| 14.05.2022 | 20:00:00 | 16,2 |
| 14.05.2022 | 21:00:00 | 16,1 |
| 14.05.2022 | 22:00:00 | 16,1 |
| 14.05.2022 | 23:00:00 | 16   |
| 15.05.2022 | 00:00:00 | 15,9 |
| 15.05.2022 | 01:00:00 | 15,9 |
| 15.05.2022 | 02:00:00 | 15,8 |
| 15.05.2022 | 03:00:00 | 15,7 |
| 15.05.2022 | 04:00:00 | 15,7 |
| 15.05.2022 | 05:00:00 | 15,6 |
| 15.05.2022 | 06:00:00 | 15,6 |
| 15.05.2022 | 07:00:00 | 15,7 |
| 15.05.2022 | 08:00:00 | 15,8 |
| 15.05.2022 | 09:00:00 | 15,9 |
| 15.05.2022 | 10:00:00 | 16,1 |
| 15.05.2022 | 11:00:00 | 16,2 |
| 15.05.2022 | 12:00:00 | 16,3 |
| 15.05.2022 | 13:00:00 | 16,5 |
| 15.05.2022 | 14:00:00 | 16,5 |
| 15.05.2022 | 15:00:00 | 16,6 |
| 15.05.2022 | 16:00:00 | 16,6 |
| 15.05.2022 | 17:00:00 | 16,5 |
| 15.05.2022 | 18:00:00 | 16,5 |
| 15.05.2022 | 19:00:00 | 16,5 |
| 15.05.2022 | 20:00:00 | 16,4 |
| 15.05.2022 | 21:00:00 | 16,3 |
| 15.05.2022 | 22:00:00 | 16,3 |
| 15.05.2022 | 23:00:00 | 16,2 |
| 16.05.2022 | 00:00:00 | 16,1 |
| 16.05.2022 | 01:00:00 | 16,1 |
| 16.05.2022 | 02:00:00 | 16   |
| 16.05.2022 | 03:00:00 | 16   |
| 16.05.2022 | 04:00:00 | 15,9 |
| 16.05.2022 | 05:00:00 | 15,9 |
| 16.05.2022 | 06:00:00 | 15,9 |
| 16.05.2022 | 07:00:00 | 15,9 |
| 16.05.2022 | 08:00:00 | 16   |
| 16.05.2022 | 09:00:00 | 16,1 |
| 16.05.2022 | 10:00:00 | 16,3 |
| 16.05.2022 | 11:00:00 | 16,4 |
| 16.05.2022 | 12:00:00 | 16,6 |

|            |          |      |
|------------|----------|------|
| 16.05.2022 | 13:00:00 | 16,7 |
| 16.05.2022 | 14:00:00 | 16,7 |
| 16.05.2022 | 15:00:00 | 16,7 |
| 16.05.2022 | 16:00:00 | 16,8 |
| 16.05.2022 | 17:00:00 | 16,8 |
| 16.05.2022 | 18:00:00 | 16,8 |
| 16.05.2022 | 19:00:00 | 16,8 |
| 16.05.2022 | 20:00:00 | 16,8 |
| 16.05.2022 | 21:00:00 | 16,7 |
| 16.05.2022 | 22:00:00 | 16,7 |
| 16.05.2022 | 23:00:00 | 16,7 |
| 17.05.2022 | 00:00:00 | 16,7 |
| 17.05.2022 | 01:00:00 | 16,6 |
| 17.05.2022 | 02:00:00 | 16,6 |
| 17.05.2022 | 03:00:00 | 16,5 |
| 17.05.2022 | 04:00:00 | 16,5 |
| 17.05.2022 | 05:00:00 | 16,4 |
| 17.05.2022 | 06:00:00 | 16,4 |
| 17.05.2022 | 07:00:00 | 16,4 |
| 17.05.2022 | 08:00:00 | 16,4 |
| 17.05.2022 | 09:00:00 | 16,5 |
| 17.05.2022 | 10:00:00 | 16,5 |
| 17.05.2022 | 11:00:00 | 16,6 |
| 17.05.2022 | 12:00:00 | 16,7 |
| 17.05.2022 | 13:00:00 | 16,7 |
| 17.05.2022 | 14:00:00 | 16,8 |
| 17.05.2022 | 15:00:00 | 16,8 |
| 17.05.2022 | 16:00:00 | 17   |
| 17.05.2022 | 17:00:00 | 17   |
| 17.05.2022 | 18:00:00 | 17   |
| 17.05.2022 | 19:00:00 | 16,9 |
| 17.05.2022 | 20:00:00 | 16,8 |
| 17.05.2022 | 21:00:00 | 16,8 |
| 17.05.2022 | 22:00:00 | 16,7 |
| 17.05.2022 | 23:00:00 | 16,7 |
| 18.05.2022 | 00:00:00 | 16,6 |
| 18.05.2022 | 01:00:00 | 16,5 |
| 18.05.2022 | 02:00:00 | 16,5 |
| 18.05.2022 | 03:00:00 | 16,4 |
| 18.05.2022 | 04:00:00 | 16,3 |
| 18.05.2022 | 05:00:00 | 16,3 |
| 18.05.2022 | 06:00:00 | 16,3 |
| 18.05.2022 | 07:00:00 | 16,4 |
| 18.05.2022 | 08:00:00 | 16,5 |
| 18.05.2022 | 09:00:00 | 16,6 |
| 18.05.2022 | 10:00:00 | 16,8 |

|            |          |      |
|------------|----------|------|
| 18.05.2022 | 11:00:00 | 16,9 |
| 18.05.2022 | 12:00:00 | 17,1 |
| 18.05.2022 | 13:00:00 | 17,2 |
| 18.05.2022 | 14:00:00 | 17,1 |
| 18.05.2022 | 15:00:00 | 17,1 |
| 18.05.2022 | 16:00:00 | 17,1 |
| 18.05.2022 | 17:00:00 | 17   |
| 18.05.2022 | 18:00:00 | 16,9 |
| 18.05.2022 | 19:00:00 | 16,8 |
| 18.05.2022 | 20:00:00 | 16,7 |
| 18.05.2022 | 21:00:00 | 16,6 |
| 18.05.2022 | 22:00:00 | 16,5 |
| 18.05.2022 | 23:00:00 | 16,3 |
| 19.05.2022 | 00:00:00 | 16,3 |
| 19.05.2022 | 01:00:00 | 16,2 |
| 19.05.2022 | 02:00:00 | 16,1 |
| 19.05.2022 | 03:00:00 | 16   |
| 19.05.2022 | 04:00:00 | 15,9 |
| 19.05.2022 | 05:00:00 | 15,9 |
| 19.05.2022 | 06:00:00 | 15,9 |
| 19.05.2022 | 07:00:00 | 15,9 |
| 19.05.2022 | 08:00:00 | 16   |
| 19.05.2022 | 09:00:00 | 16,2 |
| 19.05.2022 | 10:00:00 | 16,3 |
| 19.05.2022 | 11:00:00 | 16,5 |
| 19.05.2022 | 12:00:00 | 16,7 |
| 19.05.2022 | 13:00:00 | 16,8 |
| 19.05.2022 | 14:00:00 | 16,8 |
| 19.05.2022 | 15:00:00 | 16,9 |
| 19.05.2022 | 16:00:00 | 17   |
| 19.05.2022 | 17:00:00 | 16,9 |
| 19.05.2022 | 18:00:00 | 16,9 |
| 19.05.2022 | 19:00:00 | 16,8 |
| 19.05.2022 | 20:00:00 | 16,8 |
| 19.05.2022 | 21:00:00 | 16,7 |
| 19.05.2022 | 22:00:00 | 16,6 |
| 19.05.2022 | 23:00:00 | 16,6 |
| 20.05.2022 | 00:00:00 | 16,5 |
| 20.05.2022 | 01:00:00 | 16,5 |
| 20.05.2022 | 02:00:00 | 16,4 |
| 20.05.2022 | 03:00:00 | 16,4 |
| 20.05.2022 | 04:00:00 | 16,3 |
| 20.05.2022 | 05:00:00 | 16,3 |
| 20.05.2022 | 06:00:00 | 16,3 |
| 20.05.2022 | 07:00:00 | 16,4 |
| 20.05.2022 | 08:00:00 | 16,4 |



|            |          |      |
|------------|----------|------|
| 20.05.2022 | 09:00:00 | 16,6 |
| 20.05.2022 | 10:00:00 | 16,8 |
| 20.05.2022 | 11:00:00 | 17   |
| 20.05.2022 | 12:00:00 | 17,2 |
| 20.05.2022 | 13:00:00 | 17,3 |
| 20.05.2022 | 14:00:00 | 17,4 |
| 20.05.2022 | 15:00:00 | 17,5 |
| 20.05.2022 | 16:00:00 | 17,6 |
| 20.05.2022 | 17:00:00 | 17,6 |
| 20.05.2022 | 18:00:00 | 17,6 |
| 20.05.2022 | 19:00:00 | 17,6 |
| 20.05.2022 | 20:00:00 | 17,6 |
| 20.05.2022 | 21:00:00 | 17,5 |
| 20.05.2022 | 22:00:00 | 17,5 |
| 20.05.2022 | 23:00:00 | 17,4 |
| 21.05.2022 | 00:00:00 | 17,3 |
| 21.05.2022 | 01:00:00 | 17,3 |
| 21.05.2022 | 02:00:00 | 17,3 |
| 21.05.2022 | 03:00:00 | 17,2 |
| 21.05.2022 | 04:00:00 | 17,1 |
| 21.05.2022 | 05:00:00 | 17,1 |
| 21.05.2022 | 06:00:00 | 17   |
| 21.05.2022 | 07:00:00 | 17   |
| 21.05.2022 | 08:00:00 | 17,1 |
| 21.05.2022 | 09:00:00 | 17,2 |
| 21.05.2022 | 10:00:00 | 17,4 |
| 21.05.2022 | 11:00:00 | 17,6 |
| 21.05.2022 | 12:00:00 | 17,7 |
| 21.05.2022 | 13:00:00 | 17,8 |
| 21.05.2022 | 14:00:00 | 17,8 |
| 21.05.2022 | 15:00:00 | 17,9 |
| 21.05.2022 | 16:00:00 | 17,9 |
| 21.05.2022 | 17:00:00 | 17,9 |
| 21.05.2022 | 18:00:00 | 17,9 |
| 21.05.2022 | 19:00:00 | 17,8 |
| 21.05.2022 | 20:00:00 | 17,7 |
| 21.05.2022 | 21:00:00 | 17,6 |
| 21.05.2022 | 22:00:00 | 17,5 |
| 21.05.2022 | 23:00:00 | 17,5 |
| 22.05.2022 | 00:00:00 | 17,4 |
| 22.05.2022 | 01:00:00 | 17,3 |
| 22.05.2022 | 02:00:00 | 17,3 |
| 22.05.2022 | 03:00:00 | 17,2 |
| 22.05.2022 | 04:00:00 | 17,2 |
| 22.05.2022 | 05:00:00 | 17,1 |
| 22.05.2022 | 06:00:00 | 17,1 |

|            |          |      |
|------------|----------|------|
| 22.05.2022 | 07:00:00 | 17,1 |
| 22.05.2022 | 08:00:00 | 17,2 |
| 22.05.2022 | 09:00:00 | 17,4 |
| 22.05.2022 | 10:00:00 | 17,6 |
| 22.05.2022 | 11:00:00 | 17,7 |
| 22.05.2022 | 12:00:00 | 17,9 |
| 22.05.2022 | 13:00:00 | 18   |
| 22.05.2022 | 14:00:00 | 17,9 |
| 22.05.2022 | 15:00:00 | 17,9 |
| 22.05.2022 | 16:00:00 | 17,9 |
| 22.05.2022 | 17:00:00 | 17,9 |
| 22.05.2022 | 18:00:00 | 17,9 |
| 22.05.2022 | 19:00:00 | 17,8 |
| 22.05.2022 | 20:00:00 | 17,7 |
| 22.05.2022 | 21:00:00 | 17,6 |
| 22.05.2022 | 22:00:00 | 17,5 |
| 22.05.2022 | 23:00:00 | 17,4 |
| 23.05.2022 | 00:00:00 | 17,4 |
| 23.05.2022 | 01:00:00 | 17,3 |
| 23.05.2022 | 02:00:00 | 17,3 |
| 23.05.2022 | 03:00:00 | 17,3 |
| 23.05.2022 | 04:00:00 | 17,2 |
| 23.05.2022 | 05:00:00 | 17,2 |
| 23.05.2022 | 06:00:00 | 17,2 |
| 23.05.2022 | 07:00:00 | 17,3 |
| 23.05.2022 | 08:00:00 | 17,5 |
| 23.05.2022 | 09:00:00 | 17,4 |
| 23.05.2022 | 10:00:00 | 17,6 |
| 23.05.2022 | 11:00:00 | 17,8 |
| 23.05.2022 | 12:00:00 | 17,8 |
| 23.05.2022 | 13:00:00 | 17,9 |
| 23.05.2022 | 14:00:00 | 17,9 |
| 23.05.2022 | 15:00:00 | 17,9 |
| 23.05.2022 | 16:00:00 | 17,9 |
| 23.05.2022 | 17:00:00 | 17,9 |
| 23.05.2022 | 18:00:00 | 17,8 |
| 23.05.2022 | 19:00:00 | 17,7 |
| 23.05.2022 | 20:00:00 | 17,6 |
| 23.05.2022 | 21:00:00 | 17,6 |
| 23.05.2022 | 22:00:00 | 17,5 |
| 23.05.2022 | 23:00:00 | 17,4 |
| 24.05.2022 | 00:00:00 | 17,4 |
| 24.05.2022 | 01:00:00 | 17,3 |
| 24.05.2022 | 02:00:00 | 17,3 |
| 24.05.2022 | 03:00:00 | 17,3 |
| 24.05.2022 | 04:00:00 | 17,3 |

|            |          |      |
|------------|----------|------|
| 24.05.2022 | 05:00:00 | 17,3 |
| 24.05.2022 | 06:00:00 | 17,3 |
| 24.05.2022 | 07:00:00 | 17,3 |
| 24.05.2022 | 08:00:00 | 17,3 |
| 24.05.2022 | 09:00:00 | 17,4 |
| 24.05.2022 | 10:00:00 | 17,6 |
| 24.05.2022 | 11:00:00 | 17,7 |
| 24.05.2022 | 12:00:00 | 17,7 |
| 24.05.2022 | 13:00:00 | 17,8 |
| 24.05.2022 | 14:00:00 | 17,8 |
| 24.05.2022 | 15:00:00 | 17,8 |
| 24.05.2022 | 16:00:00 | 17,8 |
| 24.05.2022 | 17:00:00 | 17,7 |
| 24.05.2022 | 18:00:00 | 17,6 |
| 24.05.2022 | 19:00:00 | 17,6 |
| 24.05.2022 | 20:00:00 | 17,5 |
| 24.05.2022 | 21:00:00 | 17,5 |
| 24.05.2022 | 22:00:00 | 17,5 |
| 24.05.2022 | 23:00:00 | 17,4 |
| 25.05.2022 | 00:00:00 | 17,4 |
| 25.05.2022 | 01:00:00 | 17,4 |
| 25.05.2022 | 02:00:00 | 17,4 |
| 25.05.2022 | 03:00:00 | 17,3 |
| 25.05.2022 | 04:00:00 | 17,3 |
| 25.05.2022 | 05:00:00 | 17,3 |
| 25.05.2022 | 06:00:00 | 17,4 |
| 25.05.2022 | 07:00:00 | 17,4 |
| 25.05.2022 | 08:00:00 | 17,4 |
| 25.05.2022 | 09:00:00 | 17,5 |
| 25.05.2022 | 10:00:00 | 17,5 |
| 25.05.2022 | 11:00:00 | 17,5 |
| 25.05.2022 | 12:00:00 | 17,7 |
| 25.05.2022 | 13:00:00 | 17,6 |
| 25.05.2022 | 14:00:00 | 17,5 |
| 25.05.2022 | 15:00:00 | 17,4 |
| 25.05.2022 | 16:00:00 | 17,3 |
| 25.05.2022 | 17:00:00 | 17,3 |
| 25.05.2022 | 18:00:00 | 17,2 |
| 25.05.2022 | 19:00:00 | 17,2 |
| 25.05.2022 | 20:00:00 | 17,2 |
| 25.05.2022 | 21:00:00 | 17,2 |
| 25.05.2022 | 22:00:00 | 17,1 |
| 25.05.2022 | 23:00:00 | 17,1 |
| 26.05.2022 | 00:00:00 | 17,1 |
| 26.05.2022 | 01:00:00 | 17,1 |
| 26.05.2022 | 02:00:00 | 17   |

|            |          |      |
|------------|----------|------|
| 26.05.2022 | 03:00:00 | 17   |
| 26.05.2022 | 04:00:00 | 17   |
| 26.05.2022 | 05:00:00 | 16,9 |
| 26.05.2022 | 06:00:00 | 16,9 |
| 26.05.2022 | 07:00:00 | 17   |
| 26.05.2022 | 08:00:00 | 17   |
| 26.05.2022 | 09:00:00 | 17   |
| 26.05.2022 | 10:00:00 | 17,1 |
| 26.05.2022 | 11:00:00 | 17,2 |
| 26.05.2022 | 12:00:00 | 17,2 |
| 26.05.2022 | 13:00:00 | 17,3 |
| 26.05.2022 | 14:00:00 | 17,3 |
| 26.05.2022 | 15:00:00 | 17,2 |
| 26.05.2022 | 16:00:00 | 17,2 |
| 26.05.2022 | 17:00:00 | 17,1 |
| 26.05.2022 | 18:00:00 | 17   |
| 26.05.2022 | 19:00:00 | 16,9 |
| 26.05.2022 | 20:00:00 | 16,9 |
| 26.05.2022 | 21:00:00 | 16,8 |
| 26.05.2022 | 22:00:00 | 16,8 |
| 26.05.2022 | 23:00:00 | 16,7 |
| 27.05.2022 | 00:00:00 | 16,7 |
| 27.05.2022 | 01:00:00 | 16,6 |
| 27.05.2022 | 02:00:00 | 16,6 |
| 27.05.2022 | 03:00:00 | 16,5 |
| 27.05.2022 | 04:00:00 | 16,4 |
| 27.05.2022 | 05:00:00 | 16,4 |
| 27.05.2022 | 06:00:00 | 16,4 |
| 27.05.2022 | 07:00:00 | 16,5 |
| 27.05.2022 | 08:00:00 | 16,7 |
| 27.05.2022 | 09:00:00 | 16,8 |
| 27.05.2022 | 10:00:00 | 17   |
| 27.05.2022 | 11:00:00 | 17,2 |
| 27.05.2022 | 12:00:00 | 17,3 |
| 27.05.2022 | 13:00:00 | 17,4 |
| 27.05.2022 | 14:00:00 | 17,4 |
| 27.05.2022 | 15:00:00 | 17,4 |
| 27.05.2022 | 16:00:00 | 17,3 |
| 27.05.2022 | 17:00:00 | 17,3 |
| 27.05.2022 | 18:00:00 | 17,2 |
| 27.05.2022 | 19:00:00 | 17,1 |
| 27.05.2022 | 20:00:00 | 16,9 |
| 27.05.2022 | 21:00:00 | 16,8 |
| 27.05.2022 | 22:00:00 | 16,7 |
| 27.05.2022 | 23:00:00 | 16,6 |
| 28.05.2022 | 00:00:00 | 16,6 |

|            |          |      |
|------------|----------|------|
| 28.05.2022 | 01:00:00 | 16,5 |
| 28.05.2022 | 02:00:00 | 16,4 |
| 28.05.2022 | 03:00:00 | 16,4 |
| 28.05.2022 | 04:00:00 | 16,3 |
| 28.05.2022 | 05:00:00 | 16,3 |
| 28.05.2022 | 06:00:00 | 16,2 |
| 28.05.2022 | 07:00:00 | 16,2 |
| 28.05.2022 | 08:00:00 | 16,3 |
| 28.05.2022 | 09:00:00 | 16,2 |
| 28.05.2022 | 10:00:00 | 16,3 |
| 28.05.2022 | 11:00:00 | 16,5 |
| 28.05.2022 | 12:00:00 | 16,6 |
| 28.05.2022 | 13:00:00 | 16,5 |
| 28.05.2022 | 14:00:00 | 16,5 |
| 28.05.2022 | 15:00:00 | 16,6 |
| 28.05.2022 | 16:00:00 | 16,6 |
| 28.05.2022 | 17:00:00 | 16,6 |
| 28.05.2022 | 18:00:00 | 16,5 |
| 28.05.2022 | 19:00:00 | 16,5 |
| 28.05.2022 | 20:00:00 | 16,5 |
| 28.05.2022 | 21:00:00 | 16,4 |
| 28.05.2022 | 22:00:00 | 16,3 |
| 28.05.2022 | 23:00:00 | 16,2 |
| 29.05.2022 | 00:00:00 | 16,2 |
| 29.05.2022 | 01:00:00 | 16,1 |
| 29.05.2022 | 02:00:00 | 16,1 |
| 29.05.2022 | 03:00:00 | 16   |
| 29.05.2022 | 04:00:00 | 15,9 |
| 29.05.2022 | 05:00:00 | 15,9 |
| 29.05.2022 | 06:00:00 | 15,9 |
| 29.05.2022 | 07:00:00 | 15,9 |
| 29.05.2022 | 08:00:00 | 16   |
| 29.05.2022 | 09:00:00 | 16   |
| 29.05.2022 | 10:00:00 | 16,1 |
| 29.05.2022 | 11:00:00 | 16   |
| 29.05.2022 | 12:00:00 | 16   |
| 29.05.2022 | 13:00:00 | 16   |
| 29.05.2022 | 14:00:00 | 16   |
| 29.05.2022 | 15:00:00 | 15,9 |
| 29.05.2022 | 16:00:00 | 15,9 |
| 29.05.2022 | 17:00:00 | 15,9 |
| 29.05.2022 | 18:00:00 | 15,9 |
| 29.05.2022 | 19:00:00 | 15,8 |
| 29.05.2022 | 20:00:00 | 15,8 |
| 29.05.2022 | 21:00:00 | 15,8 |
| 29.05.2022 | 22:00:00 | 15,8 |

|            |          |      |
|------------|----------|------|
| 29.05.2022 | 23:00:00 | 15,8 |
| 30.05.2022 | 00:00:00 | 15,8 |
| 30.05.2022 | 01:00:00 | 15,8 |
| 30.05.2022 | 02:00:00 | 15,8 |
| 30.05.2022 | 03:00:00 | 15,7 |
| 30.05.2022 | 04:00:00 | 15,7 |
| 30.05.2022 | 05:00:00 | 15,6 |
| 30.05.2022 | 06:00:00 | 15,6 |
| 30.05.2022 | 07:00:00 | 15,7 |
| 30.05.2022 | 08:00:00 | 15,7 |
| 30.05.2022 | 09:00:00 | 15,8 |
| 30.05.2022 | 10:00:00 | 16,1 |
| 30.05.2022 | 11:00:00 | 16,2 |
| 30.05.2022 | 12:00:00 | 16,3 |
| 30.05.2022 | 13:00:00 | 16,3 |
| 30.05.2022 | 14:00:00 | 16,4 |
| 30.05.2022 | 15:00:00 | 16,3 |
| 30.05.2022 | 16:00:00 | 16,3 |
| 30.05.2022 | 17:00:00 | 16,2 |
| 30.05.2022 | 18:00:00 | 16,2 |
| 30.05.2022 | 19:00:00 | 16,1 |
| 30.05.2022 | 20:00:00 | 16,1 |
| 30.05.2022 | 21:00:00 | 16   |
| 30.05.2022 | 22:00:00 | 15,9 |
| 30.05.2022 | 23:00:00 | 15,9 |
| 31.05.2022 | 00:00:00 | 15,9 |
| 31.05.2022 | 01:00:00 | 15,9 |
| 31.05.2022 | 02:00:00 | 15,8 |
| 31.05.2022 | 03:00:00 | 15,8 |
| 31.05.2022 | 04:00:00 | 15,8 |
| 31.05.2022 | 05:00:00 | 15,8 |
| 31.05.2022 | 06:00:00 | 15,8 |
| 31.05.2022 | 07:00:00 | 15,9 |
| 31.05.2022 | 08:00:00 | 16   |
| 31.05.2022 | 09:00:00 | 16,2 |
| 31.05.2022 | 10:00:00 | 16,3 |
| 31.05.2022 | 11:00:00 | 16,4 |
| 31.05.2022 | 12:00:00 | 16,4 |
| 31.05.2022 | 13:00:00 | 16,5 |
| 31.05.2022 | 14:00:00 | 16,5 |
| 31.05.2022 | 15:00:00 | 16,5 |
| 31.05.2022 | 16:00:00 | 16,5 |
| 31.05.2022 | 17:00:00 | 16,5 |
| 31.05.2022 | 18:00:00 | 16,5 |
| 31.05.2022 | 19:00:00 | 16,4 |
| 31.05.2022 | 20:00:00 | 16,4 |

|            |          |      |
|------------|----------|------|
| 31.05.2022 | 21:00:00 | 16,4 |
| 31.05.2022 | 22:00:00 | 16,4 |
| 31.05.2022 | 23:00:00 | 16,4 |
| 01.04.2023 | 00:00:00 | 9,2  |
| 01.04.2023 | 01:00:00 | 9,1  |
| 01.04.2023 | 02:00:00 | 9,1  |
| 01.04.2023 | 03:00:00 | 9,1  |
| 01.04.2023 | 04:00:00 | 9    |
| 01.04.2023 | 05:00:00 | 9    |
| 01.04.2023 | 06:00:00 | 9    |
| 01.04.2023 | 07:00:00 | 9    |
| 01.04.2023 | 08:00:00 | 9    |
| 01.04.2023 | 09:00:00 | 9,1  |
| 01.04.2023 | 10:00:00 | 9,2  |
| 01.04.2023 | 11:00:00 | 9,2  |
| 01.04.2023 | 12:00:00 | 9,2  |
| 01.04.2023 | 13:00:00 | 9,2  |
| 01.04.2023 | 14:00:00 | 9,2  |
| 01.04.2023 | 15:00:00 | 9,2  |
| 01.04.2023 | 16:00:00 | 9,3  |
| 01.04.2023 | 17:00:00 | 9,3  |
| 01.04.2023 | 18:00:00 | 9,2  |
| 01.04.2023 | 19:00:00 | 9,1  |
| 01.04.2023 | 20:00:00 | 9,1  |
| 01.04.2023 | 21:00:00 | 9    |
| 01.04.2023 | 22:00:00 | 9    |
| 01.04.2023 | 23:00:00 | 9    |
| 02.04.2023 | 00:00:00 | 9    |
| 02.04.2023 | 01:00:00 | 9    |
| 02.04.2023 | 02:00:00 | 9    |
| 02.04.2023 | 03:00:00 | 9    |
| 02.04.2023 | 04:00:00 | 8,9  |
| 02.04.2023 | 05:00:00 | 8,9  |
| 02.04.2023 | 06:00:00 | 8,9  |
| 02.04.2023 | 07:00:00 | 8,9  |
| 02.04.2023 | 08:00:00 | 8,9  |
| 02.04.2023 | 09:00:00 | 8,9  |
| 02.04.2023 | 10:00:00 | 8,9  |
| 02.04.2023 | 11:00:00 | 9    |
| 02.04.2023 | 12:00:00 | 9    |
| 02.04.2023 | 13:00:00 | 9    |
| 02.04.2023 | 14:00:00 | 8,9  |
| 02.04.2023 | 15:00:00 | 8,9  |
| 02.04.2023 | 16:00:00 | 8,9  |
| 02.04.2023 | 17:00:00 | 8,8  |
| 02.04.2023 | 18:00:00 | 8,8  |

|            |          |     |
|------------|----------|-----|
| 02.04.2023 | 19:00:00 | 8,7 |
| 02.04.2023 | 20:00:00 | 8,7 |
| 02.04.2023 | 21:00:00 | 8,6 |
| 02.04.2023 | 22:00:00 | 8,6 |
| 02.04.2023 | 23:00:00 | 8,6 |
| 03.04.2023 | 00:00:00 | 8,5 |
| 03.04.2023 | 01:00:00 | 8,5 |
| 03.04.2023 | 02:00:00 | 8,5 |
| 03.04.2023 | 03:00:00 | 8,4 |
| 03.04.2023 | 04:00:00 | 8,4 |
| 03.04.2023 | 05:00:00 | 8,4 |
| 03.04.2023 | 06:00:00 | 8,4 |
| 03.04.2023 | 07:00:00 | 8,3 |
| 03.04.2023 | 08:00:00 | 8,3 |
| 03.04.2023 | 09:00:00 | 8,3 |
| 03.04.2023 | 10:00:00 | 8,5 |
| 03.04.2023 | 11:00:00 | 8,4 |
| 03.04.2023 | 12:00:00 | 8,4 |
| 03.04.2023 | 13:00:00 | 8,4 |
| 03.04.2023 | 14:00:00 | 8,4 |
| 03.04.2023 | 15:00:00 | 8,4 |
| 03.04.2023 | 16:00:00 | 8,4 |
| 03.04.2023 | 17:00:00 | 8,3 |
| 03.04.2023 | 18:00:00 | 8,3 |
| 03.04.2023 | 19:00:00 | 8,3 |
| 03.04.2023 | 20:00:00 | 8,2 |
| 03.04.2023 | 21:00:00 | 8,2 |
| 03.04.2023 | 22:00:00 | 8,2 |
| 03.04.2023 | 23:00:00 | 8,2 |
| 04.04.2023 | 00:00:00 | 8,2 |
| 04.04.2023 | 01:00:00 | 8,1 |
| 04.04.2023 | 02:00:00 | 8,1 |
| 04.04.2023 | 03:00:00 | 8,1 |
| 04.04.2023 | 04:00:00 | 8   |
| 04.04.2023 | 05:00:00 | 8   |
| 04.04.2023 | 06:00:00 | 7,9 |
| 04.04.2023 | 07:00:00 | 8   |
| 04.04.2023 | 08:00:00 | 8   |
| 04.04.2023 | 09:00:00 | 8,1 |
| 04.04.2023 | 10:00:00 | 8,2 |
| 04.04.2023 | 11:00:00 | 8,2 |
| 04.04.2023 | 12:00:00 | 8,4 |
| 04.04.2023 | 13:00:00 | 8,4 |
| 04.04.2023 | 14:00:00 | 8,4 |
| 04.04.2023 | 15:00:00 | 8,4 |
| 04.04.2023 | 16:00:00 | 8,3 |



|            |          |     |
|------------|----------|-----|
| 04.04.2023 | 17:00:00 | 8,3 |
| 04.04.2023 | 18:00:00 | 8,2 |
| 04.04.2023 | 19:00:00 | 8,2 |
| 04.04.2023 | 20:00:00 | 8,1 |
| 04.04.2023 | 21:00:00 | 8,1 |
| 04.04.2023 | 22:00:00 | 8,1 |
| 04.04.2023 | 23:00:00 | 8,1 |
| 05.04.2023 | 00:00:00 | 8,1 |
| 05.04.2023 | 01:00:00 | 8   |
| 05.04.2023 | 02:00:00 | 8   |
| 05.04.2023 | 03:00:00 | 8   |
| 05.04.2023 | 04:00:00 | 7,9 |
| 05.04.2023 | 05:00:00 | 7,9 |
| 05.04.2023 | 06:00:00 | 7,8 |
| 05.04.2023 | 07:00:00 | 7,9 |
| 05.04.2023 | 08:00:00 | 7,8 |
| 05.04.2023 | 09:00:00 | 7,9 |
| 05.04.2023 | 10:00:00 | 8   |
| 05.04.2023 | 11:00:00 | 8,1 |
| 05.04.2023 | 12:00:00 | 8,2 |
| 05.04.2023 | 13:00:00 | 8,2 |
| 05.04.2023 | 14:00:00 | 8,2 |
| 05.04.2023 | 15:00:00 | 8,2 |
| 05.04.2023 | 16:00:00 | 8,2 |
| 05.04.2023 | 17:00:00 | 8,2 |
| 05.04.2023 | 18:00:00 | 8,2 |
| 05.04.2023 | 19:00:00 | 8,1 |
| 05.04.2023 | 20:00:00 | 8,1 |
| 05.04.2023 | 21:00:00 | 8,1 |
| 05.04.2023 | 22:00:00 | 8,1 |
| 05.04.2023 | 23:00:00 | 8,1 |
| 06.04.2023 | 00:00:00 | 8   |
| 06.04.2023 | 01:00:00 | 7,9 |
| 06.04.2023 | 02:00:00 | 7,9 |
| 06.04.2023 | 03:00:00 | 7,9 |
| 06.04.2023 | 04:00:00 | 7,8 |
| 06.04.2023 | 05:00:00 | 7,8 |
| 06.04.2023 | 06:00:00 | 7,7 |
| 06.04.2023 | 07:00:00 | 7,8 |
| 06.04.2023 | 08:00:00 | 7,8 |
| 06.04.2023 | 09:00:00 | 7,9 |
| 06.04.2023 | 10:00:00 | 8   |
| 06.04.2023 | 11:00:00 | 8,1 |
| 06.04.2023 | 12:00:00 | 8,1 |
| 06.04.2023 | 13:00:00 | 8,2 |
| 06.04.2023 | 14:00:00 | 8,3 |

|            |          |     |
|------------|----------|-----|
| 06.04.2023 | 15:00:00 | 8,3 |
| 06.04.2023 | 16:00:00 | 8,3 |
| 06.04.2023 | 17:00:00 | 8,3 |
| 06.04.2023 | 18:00:00 | 8,2 |
| 06.04.2023 | 19:00:00 | 8,2 |
| 06.04.2023 | 20:00:00 | 8,2 |
| 06.04.2023 | 21:00:00 | 8,2 |
| 06.04.2023 | 22:00:00 | 8,1 |
| 06.04.2023 | 23:00:00 | 8,1 |
| 07.04.2023 | 00:00:00 | 8,1 |
| 07.04.2023 | 01:00:00 | 8,1 |
| 07.04.2023 | 02:00:00 | 8,1 |
| 07.04.2023 | 03:00:00 | 8,1 |
| 07.04.2023 | 04:00:00 | 8,1 |
| 07.04.2023 | 05:00:00 | 8   |
| 07.04.2023 | 06:00:00 | 8   |
| 07.04.2023 | 07:00:00 | 8   |
| 07.04.2023 | 08:00:00 | 8   |
| 07.04.2023 | 09:00:00 | 8   |
| 07.04.2023 | 10:00:00 | 8,1 |
| 07.04.2023 | 11:00:00 | 8,1 |
| 07.04.2023 | 12:00:00 | 8,1 |
| 07.04.2023 | 13:00:00 | 8,2 |
| 07.04.2023 | 14:00:00 | 8,2 |
| 07.04.2023 | 15:00:00 | 8,2 |
| 07.04.2023 | 16:00:00 | 8,3 |
| 07.04.2023 | 17:00:00 | 8,3 |
| 07.04.2023 | 18:00:00 | 8,3 |
| 07.04.2023 | 19:00:00 | 8,3 |
| 07.04.2023 | 20:00:00 | 8,3 |
| 07.04.2023 | 21:00:00 | 8,4 |
| 07.04.2023 | 22:00:00 | 8,4 |
| 07.04.2023 | 23:00:00 | 8,4 |
| 08.04.2023 | 00:00:00 | 8,4 |
| 08.04.2023 | 01:00:00 | 8,4 |
| 08.04.2023 | 02:00:00 | 8,4 |
| 08.04.2023 | 03:00:00 | 8,4 |
| 08.04.2023 | 04:00:00 | 8,3 |
| 08.04.2023 | 05:00:00 | 8,3 |
| 08.04.2023 | 06:00:00 | 8,3 |
| 08.04.2023 | 07:00:00 | 8,3 |
| 08.04.2023 | 08:00:00 | 8,2 |
| 08.04.2023 | 09:00:00 | 8,2 |
| 08.04.2023 | 10:00:00 | 8,2 |
| 08.04.2023 | 11:00:00 | 8,2 |
| 08.04.2023 | 12:00:00 | 8,2 |

|            |          |     |
|------------|----------|-----|
| 08.04.2023 | 13:00:00 | 8,2 |
| 08.04.2023 | 14:00:00 | 8,3 |
| 08.04.2023 | 15:00:00 | 8,3 |
| 08.04.2023 | 16:00:00 | 8,3 |
| 08.04.2023 | 17:00:00 | 8,2 |
| 08.04.2023 | 18:00:00 | 8,2 |
| 08.04.2023 | 19:00:00 | 8,2 |
| 08.04.2023 | 20:00:00 | 8,2 |
| 08.04.2023 | 21:00:00 | 8,2 |
| 08.04.2023 | 22:00:00 | 8,3 |
| 08.04.2023 | 23:00:00 | 8,3 |
| 09.04.2023 | 00:00:00 | 8,3 |
| 09.04.2023 | 01:00:00 | 8,4 |
| 09.04.2023 | 02:00:00 | 8,4 |
| 09.04.2023 | 03:00:00 | 8,4 |
| 09.04.2023 | 04:00:00 | 8,4 |
| 09.04.2023 | 05:00:00 | 8,4 |
| 09.04.2023 | 06:00:00 | 8,4 |
| 09.04.2023 | 07:00:00 | 8,4 |
| 09.04.2023 | 08:00:00 | 8,5 |
| 09.04.2023 | 09:00:00 | 8,5 |
| 09.04.2023 | 10:00:00 | 8,6 |
| 09.04.2023 | 11:00:00 | 8,6 |
| 09.04.2023 | 12:00:00 | 8,7 |
| 09.04.2023 | 13:00:00 | 8,7 |
| 09.04.2023 | 14:00:00 | 8,7 |
| 09.04.2023 | 15:00:00 | 8,7 |
| 09.04.2023 | 16:00:00 | 8,6 |
| 09.04.2023 | 17:00:00 | 8,6 |
| 09.04.2023 | 18:00:00 | 8,5 |
| 09.04.2023 | 19:00:00 | 8,5 |
| 09.04.2023 | 20:00:00 | 8,4 |
| 09.04.2023 | 21:00:00 | 8,4 |
| 09.04.2023 | 22:00:00 | 8,3 |
| 09.04.2023 | 23:00:00 | 8,3 |
| 10.04.2023 | 00:00:00 | 8,3 |
| 10.04.2023 | 01:00:00 | 8,3 |
| 10.04.2023 | 02:00:00 | 8,3 |
| 10.04.2023 | 03:00:00 | 8,3 |
| 10.04.2023 | 04:00:00 | 8,3 |
| 10.04.2023 | 05:00:00 | 8,3 |
| 10.04.2023 | 06:00:00 | 8,4 |
| 10.04.2023 | 07:00:00 | 8,4 |
| 10.04.2023 | 08:00:00 | 8,5 |
| 10.04.2023 | 09:00:00 | 8,5 |
| 10.04.2023 | 10:00:00 | 8,6 |

|            |          |     |
|------------|----------|-----|
| 10.04.2023 | 11:00:00 | 8,7 |
| 10.04.2023 | 12:00:00 | 8,9 |
| 10.04.2023 | 13:00:00 | 8,9 |
| 10.04.2023 | 14:00:00 | 8,9 |
| 10.04.2023 | 15:00:00 | 8,9 |
| 10.04.2023 | 16:00:00 | 8,9 |
| 10.04.2023 | 17:00:00 | 8,9 |
| 10.04.2023 | 18:00:00 | 8,8 |
| 10.04.2023 | 19:00:00 | 8,7 |
| 10.04.2023 | 20:00:00 | 8,7 |
| 10.04.2023 | 21:00:00 | 8,6 |
| 10.04.2023 | 22:00:00 | 8,6 |
| 10.04.2023 | 23:00:00 | 8,5 |
| 11.04.2023 | 00:00:00 | 8,5 |
| 11.04.2023 | 01:00:00 | 8,4 |
| 11.04.2023 | 02:00:00 | 8,5 |
| 11.04.2023 | 03:00:00 | 8,4 |
| 11.04.2023 | 04:00:00 | 8,4 |
| 11.04.2023 | 05:00:00 | 8,4 |
| 11.04.2023 | 06:00:00 | 8,4 |
| 11.04.2023 | 07:00:00 | 8,4 |
| 11.04.2023 | 08:00:00 | 8,5 |
| 11.04.2023 | 09:00:00 | 8,6 |
| 11.04.2023 | 10:00:00 | 8,6 |
| 11.04.2023 | 11:00:00 | 8,7 |
| 11.04.2023 | 12:00:00 | 8,6 |
| 11.04.2023 | 13:00:00 | 8,7 |
| 11.04.2023 | 14:00:00 | 8,7 |
| 11.04.2023 | 15:00:00 | 8,7 |
| 11.04.2023 | 16:00:00 | 8,7 |
| 11.04.2023 | 17:00:00 | 8,7 |
| 11.04.2023 | 18:00:00 | 8,6 |
| 11.04.2023 | 19:00:00 | 8,6 |
| 11.04.2023 | 20:00:00 | 8,6 |
| 11.04.2023 | 21:00:00 | 8,5 |
| 11.04.2023 | 22:00:00 | 8,5 |
| 11.04.2023 | 23:00:00 | 8,5 |
| 12.04.2023 | 00:00:00 | 8,5 |
| 12.04.2023 | 01:00:00 | 8,5 |
| 12.04.2023 | 02:00:00 | 8,5 |
| 12.04.2023 | 03:00:00 | 8,5 |
| 12.04.2023 | 04:00:00 | 8,5 |
| 12.04.2023 | 05:00:00 | 8,5 |
| 12.04.2023 | 06:00:00 | 8,5 |
| 12.04.2023 | 07:00:00 | 8,6 |
| 12.04.2023 | 08:00:00 | 8,7 |

|            |          |     |
|------------|----------|-----|
| 12.04.2023 | 09:00:00 | 8,9 |
| 12.04.2023 | 10:00:00 | 8,9 |
| 12.04.2023 | 11:00:00 | 9,1 |
| 12.04.2023 | 12:00:00 | 9,1 |
| 12.04.2023 | 13:00:00 | 9,1 |
| 12.04.2023 | 14:00:00 | 9,1 |
| 12.04.2023 | 15:00:00 | 9,1 |
| 12.04.2023 | 16:00:00 | 9   |
| 12.04.2023 | 17:00:00 | 9   |
| 12.04.2023 | 18:00:00 | 8,9 |
| 12.04.2023 | 19:00:00 | 8,8 |
| 12.04.2023 | 20:00:00 | 8,8 |
| 12.04.2023 | 21:00:00 | 8,8 |
| 12.04.2023 | 22:00:00 | 8,7 |
| 12.04.2023 | 23:00:00 | 8,7 |
| 13.04.2023 | 00:00:00 | 8,7 |
| 13.04.2023 | 01:00:00 | 8,7 |
| 13.04.2023 | 02:00:00 | 8,8 |
| 13.04.2023 | 03:00:00 | 8,8 |
| 13.04.2023 | 04:00:00 | 8,8 |
| 13.04.2023 | 05:00:00 | 8,9 |
| 13.04.2023 | 06:00:00 | 8,9 |
| 13.04.2023 | 07:00:00 | 8,9 |
| 13.04.2023 | 08:00:00 | 8,9 |
| 13.04.2023 | 09:00:00 | 8,9 |
| 13.04.2023 | 10:00:00 | 9   |
| 13.04.2023 | 11:00:00 | 9   |
| 13.04.2023 | 12:00:00 | 9   |
| 13.04.2023 | 13:00:00 | 9   |
| 13.04.2023 | 14:00:00 | 9   |
| 13.04.2023 | 15:00:00 | 9   |
| 13.04.2023 | 16:00:00 | 8,9 |
| 13.04.2023 | 17:00:00 | 8,9 |
| 13.04.2023 | 18:00:00 | 8,9 |
| 13.04.2023 | 19:00:00 | 8,9 |
| 13.04.2023 | 20:00:00 | 8,9 |
| 13.04.2023 | 21:00:00 | 8,9 |
| 13.04.2023 | 22:00:00 | 8,9 |
| 13.04.2023 | 23:00:00 | 8,9 |
| 14.04.2023 | 00:00:00 | 8,9 |
| 14.04.2023 | 01:00:00 | 9   |
| 14.04.2023 | 02:00:00 | 9   |
| 14.04.2023 | 03:00:00 | 9   |
| 14.04.2023 | 04:00:00 | 9   |
| 14.04.2023 | 05:00:00 | 9   |
| 14.04.2023 | 06:00:00 | 9   |

|            |          |     |
|------------|----------|-----|
| 14.04.2023 | 07:00:00 | 9   |
| 14.04.2023 | 08:00:00 | 8,9 |
| 14.04.2023 | 09:00:00 | 8,9 |
| 14.04.2023 | 10:00:00 | 8,8 |
| 14.04.2023 | 11:00:00 | 8,8 |
| 14.04.2023 | 12:00:00 | 8,8 |
| 14.04.2023 | 13:00:00 | 8,8 |
| 14.04.2023 | 14:00:00 | 8,8 |
| 14.04.2023 | 15:00:00 | 8,8 |
| 14.04.2023 | 16:00:00 | 8,7 |
| 14.04.2023 | 17:00:00 | 8,7 |
| 14.04.2023 | 18:00:00 | 8,8 |
| 14.04.2023 | 19:00:00 | 8,8 |
| 14.04.2023 | 20:00:00 | 8,7 |
| 14.04.2023 | 21:00:00 | 8,7 |
| 14.04.2023 | 22:00:00 | 8,7 |
| 14.04.2023 | 23:00:00 | 8,6 |
| 15.04.2023 | 00:00:00 | 8,6 |
| 15.04.2023 | 01:00:00 | 8,6 |
| 15.04.2023 | 02:00:00 | 8,5 |
| 15.04.2023 | 03:00:00 | 8,5 |
| 15.04.2023 | 04:00:00 | 8,5 |
| 15.04.2023 | 05:00:00 | 8,5 |
| 15.04.2023 | 06:00:00 | 8,5 |
| 15.04.2023 | 07:00:00 | 8,5 |
| 15.04.2023 | 08:00:00 | 8,5 |
| 15.04.2023 | 09:00:00 | 8,5 |
| 15.04.2023 | 10:00:00 | 8,5 |
| 15.04.2023 | 11:00:00 | 8,5 |
| 15.04.2023 | 12:00:00 | 8,5 |
| 15.04.2023 | 13:00:00 | 8,5 |
| 15.04.2023 | 14:00:00 | 8,5 |
| 15.04.2023 | 15:00:00 | 8,5 |
| 15.04.2023 | 16:00:00 | 8,5 |
| 15.04.2023 | 17:00:00 | 8,4 |
| 15.04.2023 | 18:00:00 | 8,4 |
| 15.04.2023 | 19:00:00 | 8,4 |
| 15.04.2023 | 20:00:00 | 8,4 |
| 15.04.2023 | 21:00:00 | 8,3 |
| 15.04.2023 | 22:00:00 | 8,3 |
| 15.04.2023 | 23:00:00 | 8,2 |
| 16.04.2023 | 00:00:00 | 8,2 |
| 16.04.2023 | 01:00:00 | 8,2 |
| 16.04.2023 | 02:00:00 | 8,1 |
| 16.04.2023 | 03:00:00 | 8,1 |
| 16.04.2023 | 04:00:00 | 8,1 |

|            |          |     |
|------------|----------|-----|
| 16.04.2023 | 05:00:00 | 8   |
| 16.04.2023 | 06:00:00 | 8   |
| 16.04.2023 | 07:00:00 | 8   |
| 16.04.2023 | 08:00:00 | 8   |
| 16.04.2023 | 09:00:00 | 8,1 |
| 16.04.2023 | 10:00:00 | 8,2 |
| 16.04.2023 | 11:00:00 | 8,2 |
| 16.04.2023 | 12:00:00 | 8,3 |
| 16.04.2023 | 13:00:00 | 8,4 |
| 16.04.2023 | 14:00:00 | 8,4 |
| 16.04.2023 | 15:00:00 | 8,4 |
| 16.04.2023 | 16:00:00 | 8,4 |
| 16.04.2023 | 17:00:00 | 8,4 |
| 16.04.2023 | 18:00:00 | 8,3 |
| 16.04.2023 | 19:00:00 | 8,3 |
| 16.04.2023 | 20:00:00 | 8,3 |
| 16.04.2023 | 21:00:00 | 8,3 |
| 16.04.2023 | 22:00:00 | 8,3 |
| 16.04.2023 | 23:00:00 | 8,3 |
| 17.04.2023 | 00:00:00 | 8,3 |
| 17.04.2023 | 01:00:00 | 8,3 |
| 17.04.2023 | 02:00:00 | 8,3 |
| 17.04.2023 | 03:00:00 | 8,3 |
| 17.04.2023 | 04:00:00 | 8,3 |
| 17.04.2023 | 05:00:00 | 8,3 |
| 17.04.2023 | 06:00:00 | 8,3 |
| 17.04.2023 | 07:00:00 | 8,4 |
| 17.04.2023 | 08:00:00 | 8,4 |
| 17.04.2023 | 09:00:00 | 8,5 |
| 17.04.2023 | 10:00:00 | 8,6 |
| 17.04.2023 | 11:00:00 | 8,7 |
| 17.04.2023 | 12:00:00 | 8,8 |
| 17.04.2023 | 13:00:00 | 8,8 |
| 17.04.2023 | 14:00:00 | 8,8 |
| 17.04.2023 | 15:00:00 | 8,7 |
| 17.04.2023 | 16:00:00 | 8,7 |
| 17.04.2023 | 17:00:00 | 8,7 |
| 17.04.2023 | 18:00:00 | 8,7 |
| 17.04.2023 | 19:00:00 | 8,6 |
| 17.04.2023 | 20:00:00 | 8,6 |
| 17.04.2023 | 21:00:00 | 8,5 |
| 17.04.2023 | 22:00:00 | 8,5 |
| 17.04.2023 | 23:00:00 | 8,5 |
| 18.04.2023 | 00:00:00 | 8,5 |
| 18.04.2023 | 01:00:00 | 8,5 |
| 18.04.2023 | 02:00:00 | 8,5 |

|            |          |     |
|------------|----------|-----|
| 18.04.2023 | 03:00:00 | 8,5 |
| 18.04.2023 | 04:00:00 | 8,5 |
| 18.04.2023 | 05:00:00 | 8,5 |
| 18.04.2023 | 06:00:00 | 8,6 |
| 18.04.2023 | 07:00:00 | 8,6 |
| 18.04.2023 | 08:00:00 | 8,6 |
| 18.04.2023 | 09:00:00 | 8,6 |
| 18.04.2023 | 10:00:00 | 8,7 |
| 18.04.2023 | 11:00:00 | 8,7 |
| 18.04.2023 | 12:00:00 | 8,8 |
| 18.04.2023 | 13:00:00 | 8,9 |
| 18.04.2023 | 14:00:00 | 8,8 |
| 18.04.2023 | 15:00:00 | 8,8 |
| 18.04.2023 | 16:00:00 | 8,8 |
| 18.04.2023 | 17:00:00 | 8,8 |
| 18.04.2023 | 18:00:00 | 8,8 |
| 18.04.2023 | 19:00:00 | 8,8 |
| 18.04.2023 | 20:00:00 | 8,7 |
| 18.04.2023 | 21:00:00 | 8,7 |
| 18.04.2023 | 22:00:00 | 8,7 |
| 18.04.2023 | 23:00:00 | 8,7 |
| 19.04.2023 | 00:00:00 | 8,7 |
| 19.04.2023 | 01:00:00 | 8,7 |
| 19.04.2023 | 02:00:00 | 8,6 |
| 19.04.2023 | 03:00:00 | 8,6 |
| 19.04.2023 | 04:00:00 | 8,6 |
| 19.04.2023 | 05:00:00 | 8,6 |
| 19.04.2023 | 06:00:00 | 8,6 |
| 19.04.2023 | 07:00:00 | 8,6 |
| 19.04.2023 | 08:00:00 | 8,6 |
| 19.04.2023 | 09:00:00 | 8,7 |
| 19.04.2023 | 10:00:00 | 8,7 |
| 19.04.2023 | 11:00:00 | 8,7 |
| 19.04.2023 | 12:00:00 | 8,7 |
| 19.04.2023 | 13:00:00 | 8,8 |
| 19.04.2023 | 14:00:00 | 8,8 |
| 19.04.2023 | 15:00:00 | 8,8 |
| 19.04.2023 | 16:00:00 | 8,8 |
| 19.04.2023 | 17:00:00 | 8,8 |
| 19.04.2023 | 18:00:00 | 8,8 |
| 19.04.2023 | 19:00:00 | 8,7 |
| 19.04.2023 | 20:00:00 | 8,7 |
| 19.04.2023 | 21:00:00 | 8,7 |
| 19.04.2023 | 22:00:00 | 8,7 |
| 19.04.2023 | 23:00:00 | 8,7 |
| 20.04.2023 | 00:00:00 | 8,7 |



|            |          |     |
|------------|----------|-----|
| 20.04.2023 | 01:00:00 | 8,7 |
| 20.04.2023 | 02:00:00 | 8,7 |
| 20.04.2023 | 03:00:00 | 8,7 |
| 20.04.2023 | 04:00:00 | 8,7 |
| 20.04.2023 | 05:00:00 | 8,7 |
| 20.04.2023 | 06:00:00 | 8,7 |
| 20.04.2023 | 07:00:00 | 8,7 |
| 20.04.2023 | 08:00:00 | 8,8 |
| 20.04.2023 | 09:00:00 | 8,8 |
| 20.04.2023 | 10:00:00 | 8,9 |
| 20.04.2023 | 11:00:00 | 9   |
| 20.04.2023 | 12:00:00 | 9,1 |
| 20.04.2023 | 13:00:00 | 9,2 |
| 20.04.2023 | 14:00:00 | 9,2 |
| 20.04.2023 | 15:00:00 | 9,3 |
| 20.04.2023 | 16:00:00 | 9,3 |
| 20.04.2023 | 17:00:00 | 9,3 |
| 20.04.2023 | 18:00:00 | 9,2 |
| 20.04.2023 | 19:00:00 | 9,2 |
| 20.04.2023 | 20:00:00 | 9,2 |
| 20.04.2023 | 21:00:00 | 9,1 |
| 20.04.2023 | 22:00:00 | 9,1 |
| 20.04.2023 | 23:00:00 | 9,1 |
| 21.04.2023 | 00:00:00 | 9,1 |
| 21.04.2023 | 01:00:00 | 9,1 |
| 21.04.2023 | 02:00:00 | 9,1 |
| 21.04.2023 | 03:00:00 | 9,1 |
| 21.04.2023 | 04:00:00 | 9   |
| 21.04.2023 | 05:00:00 | 9   |
| 21.04.2023 | 06:00:00 | 9   |
| 21.04.2023 | 07:00:00 | 9   |
| 21.04.2023 | 08:00:00 | 9,1 |
| 21.04.2023 | 09:00:00 | 9,2 |
| 21.04.2023 | 10:00:00 | 9,3 |
| 21.04.2023 | 11:00:00 | 9,4 |
| 21.04.2023 | 12:00:00 | 9,6 |
| 21.04.2023 | 13:00:00 | 9,7 |
| 21.04.2023 | 14:00:00 | 9,7 |
| 21.04.2023 | 15:00:00 | 9,8 |
| 21.04.2023 | 16:00:00 | 9,8 |
| 21.04.2023 | 17:00:00 | 9,8 |
| 21.04.2023 | 18:00:00 | 9,7 |
| 21.04.2023 | 19:00:00 | 9,7 |
| 21.04.2023 | 20:00:00 | 9,6 |
| 21.04.2023 | 21:00:00 | 9,6 |
| 21.04.2023 | 22:00:00 | 9,6 |

|            |          |      |
|------------|----------|------|
| 21.04.2023 | 23:00:00 | 9,6  |
| 22.04.2023 | 00:00:00 | 9,6  |
| 22.04.2023 | 01:00:00 | 9,6  |
| 22.04.2023 | 02:00:00 | 9,6  |
| 22.04.2023 | 03:00:00 | 9,6  |
| 22.04.2023 | 04:00:00 | 9,6  |
| 22.04.2023 | 05:00:00 | 9,6  |
| 22.04.2023 | 06:00:00 | 9,6  |
| 22.04.2023 | 07:00:00 | 9,7  |
| 22.04.2023 | 08:00:00 | 9,8  |
| 22.04.2023 | 09:00:00 | 9,9  |
| 22.04.2023 | 10:00:00 | 10,1 |
| 22.04.2023 | 11:00:00 | 10,2 |
| 22.04.2023 | 12:00:00 | 10,4 |
| 22.04.2023 | 13:00:00 | 10,5 |
| 22.04.2023 | 14:00:00 | 10,5 |
| 22.04.2023 | 15:00:00 | 10,5 |
| 22.04.2023 | 16:00:00 | 10,5 |
| 22.04.2023 | 17:00:00 | 10,4 |
| 22.04.2023 | 18:00:00 | 10,3 |
| 22.04.2023 | 19:00:00 | 10,3 |
| 22.04.2023 | 20:00:00 | 10,2 |
| 22.04.2023 | 21:00:00 | 10,2 |
| 22.04.2023 | 22:00:00 | 10,2 |
| 22.04.2023 | 23:00:00 | 10,2 |
| 23.04.2023 | 00:00:00 | 10,2 |
| 23.04.2023 | 01:00:00 | 10,2 |
| 23.04.2023 | 02:00:00 | 10,2 |
| 23.04.2023 | 03:00:00 | 10,1 |
| 23.04.2023 | 04:00:00 | 10,1 |
| 23.04.2023 | 05:00:00 | 10,1 |
| 23.04.2023 | 06:00:00 | 10,1 |
| 23.04.2023 | 07:00:00 | 10,1 |
| 23.04.2023 | 08:00:00 | 10,3 |
| 23.04.2023 | 09:00:00 | 10,4 |
| 23.04.2023 | 10:00:00 | 10,6 |
| 23.04.2023 | 11:00:00 | 10,7 |
| 23.04.2023 | 12:00:00 | 10,9 |
| 23.04.2023 | 13:00:00 | 11   |
| 23.04.2023 | 14:00:00 | 11   |
| 23.04.2023 | 15:00:00 | 11   |
| 23.04.2023 | 16:00:00 | 10,9 |
| 23.04.2023 | 17:00:00 | 10,9 |
| 23.04.2023 | 18:00:00 | 10,8 |
| 23.04.2023 | 19:00:00 | 10,7 |
| 23.04.2023 | 20:00:00 | 10,7 |

|            |          |      |
|------------|----------|------|
| 23.04.2023 | 21:00:00 | 10,6 |
| 23.04.2023 | 22:00:00 | 10,6 |
| 23.04.2023 | 23:00:00 | 10,6 |
| 24.04.2023 | 00:00:00 | 10,6 |
| 24.04.2023 | 01:00:00 | 10,6 |
| 24.04.2023 | 02:00:00 | 10,6 |
| 24.04.2023 | 03:00:00 | 10,5 |
| 24.04.2023 | 04:00:00 | 10,5 |
| 24.04.2023 | 05:00:00 | 10,5 |
| 24.04.2023 | 06:00:00 | 10,5 |
| 24.04.2023 | 07:00:00 | 10,5 |
| 24.04.2023 | 08:00:00 | 10,6 |
| 24.04.2023 | 09:00:00 | 10,7 |
| 24.04.2023 | 10:00:00 | 10,7 |
| 24.04.2023 | 11:00:00 | 10,8 |
| 24.04.2023 | 12:00:00 | 10,8 |
| 24.04.2023 | 13:00:00 | 10,8 |
| 24.04.2023 | 14:00:00 | 10,8 |
| 24.04.2023 | 15:00:00 | 10,8 |
| 24.04.2023 | 16:00:00 | 10,8 |
| 24.04.2023 | 17:00:00 | 10,8 |
| 24.04.2023 | 18:00:00 | 10,7 |
| 24.04.2023 | 19:00:00 | 10,7 |
| 24.04.2023 | 20:00:00 | 10,7 |
| 24.04.2023 | 21:00:00 | 10,6 |
| 24.04.2023 | 22:00:00 | 10,6 |
| 24.04.2023 | 23:00:00 | 10,6 |
| 25.04.2023 | 00:00:00 | 10,6 |
| 25.04.2023 | 01:00:00 | 10,6 |
| 25.04.2023 | 02:00:00 | 10,6 |
| 25.04.2023 | 03:00:00 | 10,6 |
| 25.04.2023 | 04:00:00 | 10,6 |
| 25.04.2023 | 05:00:00 | 10,5 |
| 25.04.2023 | 06:00:00 | 10,5 |
| 25.04.2023 | 07:00:00 | 10,6 |
| 25.04.2023 | 08:00:00 | 10,7 |
| 25.04.2023 | 09:00:00 | 10,8 |
| 25.04.2023 | 10:00:00 | 10,9 |
| 25.04.2023 | 11:00:00 | 11   |
| 25.04.2023 | 12:00:00 | 11   |
| 25.04.2023 | 13:00:00 | 10,9 |
| 25.04.2023 | 14:00:00 | 11   |
| 25.04.2023 | 15:00:00 | 11,1 |
| 25.04.2023 | 16:00:00 | 11   |
| 25.04.2023 | 17:00:00 | 11   |
| 25.04.2023 | 18:00:00 | 10,9 |

|            |          |      |
|------------|----------|------|
| 25.04.2023 | 19:00:00 | 10,9 |
| 25.04.2023 | 20:00:00 | 10,8 |
| 25.04.2023 | 21:00:00 | 10,8 |
| 25.04.2023 | 22:00:00 | 10,8 |
| 25.04.2023 | 23:00:00 | 10,8 |
| 26.04.2023 | 00:00:00 | 10,8 |
| 26.04.2023 | 01:00:00 | 10,8 |
| 26.04.2023 | 02:00:00 | 10,8 |
| 26.04.2023 | 03:00:00 | 10,8 |
| 26.04.2023 | 04:00:00 | 10,7 |
| 26.04.2023 | 05:00:00 | 10,7 |
| 26.04.2023 | 06:00:00 | 10,7 |
| 26.04.2023 | 07:00:00 | 10,7 |
| 26.04.2023 | 08:00:00 | 10,8 |
| 26.04.2023 | 09:00:00 | 10,9 |
| 26.04.2023 | 10:00:00 | 10,9 |
| 26.04.2023 | 11:00:00 | 10,9 |
| 26.04.2023 | 12:00:00 | 11   |
| 26.04.2023 | 13:00:00 | 11   |
| 26.04.2023 | 14:00:00 | 11   |
| 26.04.2023 | 15:00:00 | 11   |
| 26.04.2023 | 16:00:00 | 11   |
| 26.04.2023 | 17:00:00 | 11   |
| 26.04.2023 | 18:00:00 | 11   |
| 26.04.2023 | 19:00:00 | 10,9 |
| 26.04.2023 | 20:00:00 | 10,9 |
| 26.04.2023 | 21:00:00 | 10,9 |
| 26.04.2023 | 22:00:00 | 10,9 |
| 26.04.2023 | 23:00:00 | 11   |
| 27.04.2023 | 00:00:00 | 11   |
| 27.04.2023 | 01:00:00 | 11   |
| 27.04.2023 | 02:00:00 | 11   |
| 27.04.2023 | 03:00:00 | 11   |
| 27.04.2023 | 04:00:00 | 10,9 |
| 27.04.2023 | 05:00:00 | 10,9 |
| 27.04.2023 | 06:00:00 | 10,9 |
| 27.04.2023 | 07:00:00 | 10,9 |
| 27.04.2023 | 08:00:00 | 11   |
| 27.04.2023 | 09:00:00 | 11,1 |
| 27.04.2023 | 10:00:00 | 11,2 |
| 27.04.2023 | 11:00:00 | 11,4 |
| 27.04.2023 | 12:00:00 | 11,4 |
| 27.04.2023 | 13:00:00 | 11,5 |
| 27.04.2023 | 14:00:00 | 11,5 |
| 27.04.2023 | 15:00:00 | 11,5 |
| 27.04.2023 | 16:00:00 | 11,5 |

|            |          |      |
|------------|----------|------|
| 27.04.2023 | 17:00:00 | 11,5 |
| 27.04.2023 | 18:00:00 | 11,5 |
| 27.04.2023 | 19:00:00 | 11,4 |
| 27.04.2023 | 20:00:00 | 11,4 |
| 27.04.2023 | 21:00:00 | 11,3 |
| 27.04.2023 | 22:00:00 | 11,3 |
| 27.04.2023 | 23:00:00 | 11,2 |
| 28.04.2023 | 00:00:00 | 11,2 |
| 28.04.2023 | 01:00:00 | 11,2 |
| 28.04.2023 | 02:00:00 | 11,2 |
| 28.04.2023 | 03:00:00 | 11,1 |
| 28.04.2023 | 04:00:00 | 11,1 |
| 28.04.2023 | 05:00:00 | 11,1 |
| 28.04.2023 | 06:00:00 | 11,1 |
| 28.04.2023 | 07:00:00 | 11,1 |
| 28.04.2023 | 08:00:00 | 11,1 |
| 28.04.2023 | 09:00:00 | 11,2 |
| 28.04.2023 | 10:00:00 | 11,3 |
| 28.04.2023 | 11:00:00 | 11,4 |
| 28.04.2023 | 12:00:00 | 11,5 |
| 28.04.2023 | 13:00:00 | 11,7 |
| 28.04.2023 | 14:00:00 | 11,6 |
| 28.04.2023 | 15:00:00 | 11,6 |
| 28.04.2023 | 16:00:00 | 11,6 |
| 28.04.2023 | 17:00:00 | 11,5 |
| 28.04.2023 | 18:00:00 | 11,5 |
| 28.04.2023 | 19:00:00 | 11,5 |
| 28.04.2023 | 20:00:00 | 11,4 |
| 28.04.2023 | 21:00:00 | 11,4 |
| 28.04.2023 | 22:00:00 | 11,4 |
| 28.04.2023 | 23:00:00 | 11,4 |
| 29.04.2023 | 00:00:00 | 11,4 |
| 29.04.2023 | 01:00:00 | 11,4 |
| 29.04.2023 | 02:00:00 | 11,4 |
| 29.04.2023 | 03:00:00 | 11,4 |
| 29.04.2023 | 04:00:00 | 11,4 |
| 29.04.2023 | 05:00:00 | 11,4 |
| 29.04.2023 | 06:00:00 | 11,4 |
| 29.04.2023 | 07:00:00 | 11,4 |
| 29.04.2023 | 08:00:00 | 11,5 |
| 29.04.2023 | 09:00:00 | 11,6 |
| 29.04.2023 | 10:00:00 | 11,7 |
| 29.04.2023 | 11:00:00 | 11,7 |
| 29.04.2023 | 12:00:00 | 11,8 |
| 29.04.2023 | 13:00:00 | 11,9 |
| 29.04.2023 | 14:00:00 | 11,9 |

|            |          |      |
|------------|----------|------|
| 29.04.2023 | 15:00:00 | 11,9 |
| 29.04.2023 | 16:00:00 | 11,9 |
| 29.04.2023 | 17:00:00 | 11,9 |
| 29.04.2023 | 18:00:00 | 11,8 |
| 29.04.2023 | 19:00:00 | 11,8 |
| 29.04.2023 | 20:00:00 | 11,7 |
| 29.04.2023 | 21:00:00 | 11,7 |
| 29.04.2023 | 22:00:00 | 11,7 |
| 29.04.2023 | 23:00:00 | 11,6 |
| 30.04.2023 | 00:00:00 | 11,6 |
| 30.04.2023 | 01:00:00 | 11,6 |
| 30.04.2023 | 02:00:00 | 11,6 |
| 30.04.2023 | 03:00:00 | 11,6 |
| 30.04.2023 | 04:00:00 | 11,6 |
| 30.04.2023 | 05:00:00 | 11,6 |
| 30.04.2023 | 06:00:00 | 11,6 |
| 30.04.2023 | 07:00:00 | 11,7 |
| 30.04.2023 | 08:00:00 | 11,8 |
| 30.04.2023 | 09:00:00 | 11,9 |
| 30.04.2023 | 10:00:00 | 11,9 |
| 30.04.2023 | 11:00:00 | 11,9 |
| 30.04.2023 | 12:00:00 | 12   |
| 30.04.2023 | 13:00:00 | 11,9 |
| 30.04.2023 | 14:00:00 | 11,9 |
| 30.04.2023 | 15:00:00 | 12   |
| 30.04.2023 | 16:00:00 | 11,9 |
| 30.04.2023 | 17:00:00 | 11,9 |
| 30.04.2023 | 18:00:00 | 11,9 |
| 30.04.2023 | 19:00:00 | 11,9 |
| 30.04.2023 | 20:00:00 | 11,9 |
| 30.04.2023 | 21:00:00 | 11,9 |
| 30.04.2023 | 22:00:00 | 11,9 |
| 30.04.2023 | 23:00:00 | 11,9 |
| 01.05.2023 | 00:00:00 | 11,9 |
| 01.05.2023 | 01:00:00 | 11,8 |
| 01.05.2023 | 02:00:00 | 11,8 |
| 01.05.2023 | 03:00:00 | 11,8 |
| 01.05.2023 | 04:00:00 | 11,8 |
| 01.05.2023 | 05:00:00 | 11,8 |
| 01.05.2023 | 06:00:00 | 11,8 |
| 01.05.2023 | 07:00:00 | 11,8 |
| 01.05.2023 | 08:00:00 | 11,9 |
| 01.05.2023 | 09:00:00 | 12   |
| 01.05.2023 | 10:00:00 | 12,1 |
| 01.05.2023 | 11:00:00 | 12,2 |
| 01.05.2023 | 12:00:00 | 12,3 |

|            |          |      |
|------------|----------|------|
| 01.05.2023 | 13:00:00 | 12,3 |
| 01.05.2023 | 14:00:00 | 12,3 |
| 01.05.2023 | 15:00:00 | 12,3 |
| 01.05.2023 | 16:00:00 | 12,3 |
| 01.05.2023 | 17:00:00 | 12,3 |
| 01.05.2023 | 18:00:00 | 12,2 |
| 01.05.2023 | 19:00:00 | 12,2 |
| 01.05.2023 | 20:00:00 | 12,1 |
| 01.05.2023 | 21:00:00 | 12,1 |
| 01.05.2023 | 22:00:00 | 12,1 |
| 01.05.2023 | 23:00:00 | 12,1 |
| 02.05.2023 | 00:00:00 | 12   |
| 02.05.2023 | 01:00:00 | 12   |
| 02.05.2023 | 02:00:00 | 12   |
| 02.05.2023 | 03:00:00 | 12   |
| 02.05.2023 | 04:00:00 | 12   |
| 02.05.2023 | 05:00:00 | 12   |
| 02.05.2023 | 06:00:00 | 12   |
| 02.05.2023 | 07:00:00 | 12,1 |
| 02.05.2023 | 08:00:00 | 12,2 |
| 02.05.2023 | 09:00:00 | 12,2 |
| 02.05.2023 | 10:00:00 | 12,3 |
| 02.05.2023 | 11:00:00 | 12,3 |
| 02.05.2023 | 12:00:00 | 12,3 |
| 02.05.2023 | 13:00:00 | 12,3 |
| 02.05.2023 | 14:00:00 | 12,3 |
| 02.05.2023 | 15:00:00 | 12,3 |
| 02.05.2023 | 16:00:00 | 12,2 |
| 02.05.2023 | 17:00:00 | 12,1 |
| 02.05.2023 | 18:00:00 | 12   |
| 02.05.2023 | 19:00:00 | 12   |
| 02.05.2023 | 20:00:00 | 11,9 |
| 02.05.2023 | 21:00:00 | 11,9 |
| 02.05.2023 | 22:00:00 | 11,9 |
| 02.05.2023 | 23:00:00 | 11,9 |
| 03.05.2023 | 00:00:00 | 11,8 |
| 03.05.2023 | 01:00:00 | 11,8 |
| 03.05.2023 | 02:00:00 | 11,8 |
| 03.05.2023 | 03:00:00 | 11,8 |
| 03.05.2023 | 04:00:00 | 11,8 |
| 03.05.2023 | 05:00:00 | 11,8 |
| 03.05.2023 | 06:00:00 | 11,9 |
| 03.05.2023 | 07:00:00 | 11,9 |
| 03.05.2023 | 08:00:00 | 12   |
| 03.05.2023 | 09:00:00 | 12,1 |
| 03.05.2023 | 10:00:00 | 12,2 |

|            |          |      |
|------------|----------|------|
| 03.05.2023 | 11:00:00 | 12,3 |
| 03.05.2023 | 12:00:00 | 12,4 |
| 03.05.2023 | 13:00:00 | 12,4 |
| 03.05.2023 | 14:00:00 | 12,3 |
| 03.05.2023 | 15:00:00 | 12,2 |
| 03.05.2023 | 16:00:00 | 12,2 |
| 03.05.2023 | 17:00:00 | 12,2 |
| 03.05.2023 | 18:00:00 | 12,2 |
| 03.05.2023 | 19:00:00 | 12,2 |
| 03.05.2023 | 20:00:00 | 12,1 |
| 03.05.2023 | 21:00:00 | 12,1 |
| 03.05.2023 | 22:00:00 | 12   |
| 03.05.2023 | 23:00:00 | 12   |
| 04.05.2023 | 00:00:00 | 12   |
| 04.05.2023 | 01:00:00 | 12   |
| 04.05.2023 | 02:00:00 | 11,9 |
| 04.05.2023 | 03:00:00 | 11,9 |
| 04.05.2023 | 04:00:00 | 11,9 |
| 04.05.2023 | 05:00:00 | 11,8 |
| 04.05.2023 | 06:00:00 | 11,8 |
| 04.05.2023 | 07:00:00 | 11,9 |
| 04.05.2023 | 08:00:00 | 12   |
| 04.05.2023 | 09:00:00 | 12,1 |
| 04.05.2023 | 10:00:00 | 12,2 |
| 04.05.2023 | 11:00:00 | 12,4 |
| 04.05.2023 | 12:00:00 | 12,5 |
| 04.05.2023 | 13:00:00 | 12,6 |
| 04.05.2023 | 14:00:00 | 12,6 |
| 04.05.2023 | 15:00:00 | 12,6 |
| 04.05.2023 | 16:00:00 | 12,6 |
| 04.05.2023 | 17:00:00 | 12,6 |
| 04.05.2023 | 18:00:00 | 12,6 |
| 04.05.2023 | 19:00:00 | 12,5 |
| 04.05.2023 | 20:00:00 | 12,5 |
| 04.05.2023 | 21:00:00 | 12,4 |
| 04.05.2023 | 22:00:00 | 12,4 |
| 04.05.2023 | 23:00:00 | 12,4 |
| 05.05.2023 | 00:00:00 | 12,3 |
| 05.05.2023 | 01:00:00 | 12,3 |
| 05.05.2023 | 02:00:00 | 12,3 |
| 05.05.2023 | 03:00:00 | 12,2 |
| 05.05.2023 | 04:00:00 | 12,2 |
| 05.05.2023 | 05:00:00 | 12,2 |
| 05.05.2023 | 06:00:00 | 12,2 |
| 05.05.2023 | 07:00:00 | 12,2 |
| 05.05.2023 | 08:00:00 | 12,4 |



|            |          |      |
|------------|----------|------|
| 05.05.2023 | 09:00:00 | 12,5 |
| 05.05.2023 | 10:00:00 | 12,7 |
| 05.05.2023 | 11:00:00 | 12,9 |
| 05.05.2023 | 12:00:00 | 13   |
| 05.05.2023 | 13:00:00 | 13,1 |
| 05.05.2023 | 14:00:00 | 13,1 |
| 05.05.2023 | 15:00:00 | 13,2 |
| 05.05.2023 | 16:00:00 | 13,1 |
| 05.05.2023 | 17:00:00 | 13,1 |
| 05.05.2023 | 18:00:00 | 13   |
| 05.05.2023 | 19:00:00 | 13   |
| 05.05.2023 | 20:00:00 | 12,9 |
| 05.05.2023 | 21:00:00 | 12,8 |
| 05.05.2023 | 22:00:00 | 12,8 |
| 05.05.2023 | 23:00:00 | 12,8 |
| 06.05.2023 | 00:00:00 | 12,7 |
| 06.05.2023 | 01:00:00 | 12,7 |
| 06.05.2023 | 02:00:00 | 12,7 |
| 06.05.2023 | 03:00:00 | 12,6 |
| 06.05.2023 | 04:00:00 | 12,6 |
| 06.05.2023 | 05:00:00 | 12,6 |
| 06.05.2023 | 06:00:00 | 12,6 |
| 06.05.2023 | 07:00:00 | 12,6 |
| 06.05.2023 | 08:00:00 | 12,6 |
| 06.05.2023 | 09:00:00 | 12,8 |
| 06.05.2023 | 10:00:00 | 12,9 |
| 06.05.2023 | 11:00:00 | 13   |
| 06.05.2023 | 12:00:00 | 13,1 |
| 06.05.2023 | 13:00:00 | 13,1 |
| 06.05.2023 | 14:00:00 | 13,2 |
| 06.05.2023 | 15:00:00 | 13,2 |
| 06.05.2023 | 16:00:00 | 13,2 |
| 06.05.2023 | 17:00:00 | 13,2 |
| 06.05.2023 | 18:00:00 | 13,2 |
| 06.05.2023 | 19:00:00 | 13,1 |
| 06.05.2023 | 20:00:00 | 13,1 |
| 06.05.2023 | 21:00:00 | 13,1 |
| 06.05.2023 | 22:00:00 | 13   |
| 06.05.2023 | 23:00:00 | 13   |
| 07.05.2023 | 00:00:00 | 13   |
| 07.05.2023 | 01:00:00 | 12,9 |
| 07.05.2023 | 02:00:00 | 12,9 |
| 07.05.2023 | 03:00:00 | 12,9 |
| 07.05.2023 | 04:00:00 | 12,9 |
| 07.05.2023 | 05:00:00 | 12,9 |
| 07.05.2023 | 06:00:00 | 12,9 |

|            |          |      |
|------------|----------|------|
| 07.05.2023 | 07:00:00 | 13   |
| 07.05.2023 | 08:00:00 | 13   |
| 07.05.2023 | 09:00:00 | 13,1 |
| 07.05.2023 | 10:00:00 | 13,2 |
| 07.05.2023 | 11:00:00 | 13,3 |
| 07.05.2023 | 12:00:00 | 13,4 |
| 07.05.2023 | 13:00:00 | 13,5 |
| 07.05.2023 | 14:00:00 | 13,5 |
| 07.05.2023 | 15:00:00 | 13,6 |
| 07.05.2023 | 16:00:00 | 13,6 |
| 07.05.2023 | 17:00:00 | 13,6 |
| 07.05.2023 | 18:00:00 | 13,6 |
| 07.05.2023 | 19:00:00 | 13,6 |
| 07.05.2023 | 20:00:00 | 13,5 |
| 07.05.2023 | 21:00:00 | 13,5 |
| 07.05.2023 | 22:00:00 | 13,4 |
| 07.05.2023 | 23:00:00 | 13,4 |
| 08.05.2023 | 00:00:00 | 13,4 |
| 08.05.2023 | 01:00:00 | 13,4 |
| 08.05.2023 | 02:00:00 | 13,3 |
| 08.05.2023 | 03:00:00 | 13,3 |
| 08.05.2023 | 04:00:00 | 13,3 |
| 08.05.2023 | 05:00:00 | 13,3 |
| 08.05.2023 | 06:00:00 | 13,3 |
| 08.05.2023 | 07:00:00 | 13,3 |
| 08.05.2023 | 08:00:00 | 13,5 |
| 08.05.2023 | 09:00:00 | 13,6 |
| 08.05.2023 | 10:00:00 | 13,7 |
| 08.05.2023 | 11:00:00 | 13,8 |
| 08.05.2023 | 12:00:00 | 13,8 |
| 08.05.2023 | 13:00:00 | 13,9 |
| 08.05.2023 | 14:00:00 | 13,9 |
| 08.05.2023 | 15:00:00 | 14   |
| 08.05.2023 | 16:00:00 | 14   |
| 08.05.2023 | 17:00:00 | 13,9 |
| 08.05.2023 | 18:00:00 | 13,8 |
| 08.05.2023 | 19:00:00 | 13,7 |
| 08.05.2023 | 20:00:00 | 13,7 |
| 08.05.2023 | 21:00:00 | 13,6 |
| 08.05.2023 | 22:00:00 | 13,5 |
| 08.05.2023 | 23:00:00 | 13,5 |
| 09.05.2023 | 00:00:00 | 13,4 |
| 09.05.2023 | 01:00:00 | 13,4 |
| 09.05.2023 | 02:00:00 | 13,3 |
| 09.05.2023 | 03:00:00 | 13,3 |
| 09.05.2023 | 04:00:00 | 13,2 |

|            |          |      |
|------------|----------|------|
| 09.05.2023 | 05:00:00 | 13,2 |
| 09.05.2023 | 06:00:00 | 13,2 |
| 09.05.2023 | 07:00:00 | 13,2 |
| 09.05.2023 | 08:00:00 | 13,3 |
| 09.05.2023 | 09:00:00 | 13,5 |
| 09.05.2023 | 10:00:00 | 13,6 |
| 09.05.2023 | 11:00:00 | 13,8 |
| 09.05.2023 | 12:00:00 | 13,9 |
| 09.05.2023 | 13:00:00 | 13,9 |
| 09.05.2023 | 14:00:00 | 13,9 |
| 09.05.2023 | 15:00:00 | 13,8 |
| 09.05.2023 | 16:00:00 | 13,9 |
| 09.05.2023 | 17:00:00 | 13,8 |
| 09.05.2023 | 18:00:00 | 13,8 |
| 09.05.2023 | 19:00:00 | 13,7 |
| 09.05.2023 | 20:00:00 | 13,6 |
| 09.05.2023 | 21:00:00 | 13,6 |
| 09.05.2023 | 22:00:00 | 13,5 |
| 09.05.2023 | 23:00:00 | 13,5 |
| 10.05.2023 | 00:00:00 | 13,4 |
| 10.05.2023 | 01:00:00 | 13,4 |
| 10.05.2023 | 02:00:00 | 13,4 |
| 10.05.2023 | 03:00:00 | 13,3 |
| 10.05.2023 | 04:00:00 | 13,3 |
| 10.05.2023 | 05:00:00 | 13,3 |
| 10.05.2023 | 06:00:00 | 13,3 |
| 10.05.2023 | 07:00:00 | 13,3 |
| 10.05.2023 | 08:00:00 | 13,4 |
| 10.05.2023 | 09:00:00 | 13,6 |
| 10.05.2023 | 10:00:00 | 13,7 |
| 10.05.2023 | 11:00:00 | 13,8 |
| 10.05.2023 | 12:00:00 | 14   |
| 10.05.2023 | 13:00:00 | 14,1 |
| 10.05.2023 | 14:00:00 | 14,1 |
| 10.05.2023 | 15:00:00 | 14,1 |
| 10.05.2023 | 16:00:00 | 14,1 |
| 10.05.2023 | 17:00:00 | 14   |
| 10.05.2023 | 18:00:00 | 14   |
| 10.05.2023 | 19:00:00 | 13,9 |
| 10.05.2023 | 20:00:00 | 13,9 |
| 10.05.2023 | 21:00:00 | 13,8 |
| 10.05.2023 | 22:00:00 | 13,8 |
| 10.05.2023 | 23:00:00 | 13,7 |
| 11.05.2023 | 00:00:00 | 13,7 |
| 11.05.2023 | 01:00:00 | 13,7 |
| 11.05.2023 | 02:00:00 | 13,6 |

|            |          |      |
|------------|----------|------|
| 11.05.2023 | 03:00:00 | 13,6 |
| 11.05.2023 | 04:00:00 | 13,6 |
| 11.05.2023 | 05:00:00 | 13,5 |
| 11.05.2023 | 06:00:00 | 13,5 |
| 11.05.2023 | 07:00:00 | 13,6 |
| 11.05.2023 | 08:00:00 | 13,7 |
| 11.05.2023 | 09:00:00 | 13,7 |
| 11.05.2023 | 10:00:00 | 13,9 |
| 11.05.2023 | 11:00:00 | 13,9 |
| 11.05.2023 | 12:00:00 | 14   |
| 11.05.2023 | 13:00:00 | 14   |
| 11.05.2023 | 14:00:00 | 14   |
| 11.05.2023 | 15:00:00 | 14   |
| 11.05.2023 | 16:00:00 | 14   |
| 11.05.2023 | 17:00:00 | 13,9 |
| 11.05.2023 | 18:00:00 | 13,9 |
| 11.05.2023 | 19:00:00 | 13,8 |
| 11.05.2023 | 20:00:00 | 13,8 |
| 11.05.2023 | 21:00:00 | 13,7 |
| 11.05.2023 | 22:00:00 | 13,7 |
| 11.05.2023 | 23:00:00 | 13,6 |
| 12.05.2023 | 00:00:00 | 13,6 |
| 12.05.2023 | 01:00:00 | 13,6 |
| 12.05.2023 | 02:00:00 | 13,6 |
| 12.05.2023 | 03:00:00 | 13,6 |
| 12.05.2023 | 04:00:00 | 13,5 |
| 12.05.2023 | 05:00:00 | 13,5 |
| 12.05.2023 | 06:00:00 | 13,5 |
| 12.05.2023 | 07:00:00 | 13,5 |
| 12.05.2023 | 08:00:00 | 13,5 |
| 12.05.2023 | 09:00:00 | 13,5 |
| 12.05.2023 | 10:00:00 | 13,5 |
| 12.05.2023 | 11:00:00 | 13,5 |
| 12.05.2023 | 12:00:00 | 13,5 |
| 12.05.2023 | 13:00:00 | 13,5 |
| 12.05.2023 | 14:00:00 | 13,5 |
| 12.05.2023 | 15:00:00 | 13,5 |
| 12.05.2023 | 16:00:00 | 13,5 |
| 12.05.2023 | 17:00:00 | 13,5 |
| 12.05.2023 | 18:00:00 | 13,5 |
| 12.05.2023 | 19:00:00 | 13,4 |
| 12.05.2023 | 20:00:00 | 13,4 |
| 12.05.2023 | 21:00:00 | 13,4 |
| 12.05.2023 | 22:00:00 | 13,4 |
| 12.05.2023 | 23:00:00 | 13,4 |
| 13.05.2023 | 00:00:00 | 13,4 |

|            |          |      |
|------------|----------|------|
| 13.05.2023 | 01:00:00 | 13,3 |
| 13.05.2023 | 02:00:00 | 13,3 |
| 13.05.2023 | 03:00:00 | 13,3 |
| 13.05.2023 | 04:00:00 | 13,3 |
| 13.05.2023 | 05:00:00 | 13,3 |
| 13.05.2023 | 06:00:00 | 13,2 |
| 13.05.2023 | 07:00:00 | 13,3 |
| 13.05.2023 | 08:00:00 | 13,3 |
| 13.05.2023 | 09:00:00 | 13,3 |
| 13.05.2023 | 10:00:00 | 13,2 |
| 13.05.2023 | 11:00:00 | 13,3 |
| 13.05.2023 | 12:00:00 | 13,3 |
| 13.05.2023 | 13:00:00 | 13,3 |
| 13.05.2023 | 14:00:00 | 13,3 |
| 13.05.2023 | 15:00:00 | 13,2 |
| 13.05.2023 | 16:00:00 | 13,2 |
| 13.05.2023 | 17:00:00 | 13,1 |
| 13.05.2023 | 18:00:00 | 13,1 |
| 13.05.2023 | 19:00:00 | 13   |
| 13.05.2023 | 20:00:00 | 12,9 |
| 13.05.2023 | 21:00:00 | 12,9 |
| 13.05.2023 | 22:00:00 | 12,8 |
| 13.05.2023 | 23:00:00 | 12,8 |
| 14.05.2023 | 00:00:00 | 12,7 |
| 14.05.2023 | 01:00:00 | 12,7 |
| 14.05.2023 | 02:00:00 | 12,7 |
| 14.05.2023 | 03:00:00 | 12,6 |
| 14.05.2023 | 04:00:00 | 12,6 |
| 14.05.2023 | 05:00:00 | 12,6 |
| 14.05.2023 | 06:00:00 | 12,6 |
| 14.05.2023 | 07:00:00 | 12,6 |
| 14.05.2023 | 08:00:00 | 12,6 |
| 14.05.2023 | 09:00:00 | 12,6 |
| 14.05.2023 | 10:00:00 | 12,6 |
| 14.05.2023 | 11:00:00 | 12,6 |
| 14.05.2023 | 12:00:00 | 12,6 |
| 14.05.2023 | 13:00:00 | 12,6 |
| 14.05.2023 | 14:00:00 | 12,6 |
| 14.05.2023 | 15:00:00 | 12,6 |
| 14.05.2023 | 16:00:00 | 12,6 |
| 14.05.2023 | 17:00:00 | 12,6 |
| 14.05.2023 | 18:00:00 | 12,5 |
| 14.05.2023 | 19:00:00 | 12,5 |
| 14.05.2023 | 20:00:00 | 12,5 |
| 14.05.2023 | 21:00:00 | 12,5 |
| 14.05.2023 | 22:00:00 | 12,5 |

|            |          |      |
|------------|----------|------|
| 14.05.2023 | 23:00:00 | 12,5 |
| 15.05.2023 | 00:00:00 | 12,5 |
| 15.05.2023 | 01:00:00 | 12,5 |
| 15.05.2023 | 02:00:00 | 12,5 |
| 15.05.2023 | 03:00:00 | 12,5 |
| 15.05.2023 | 04:00:00 | 12,5 |
| 15.05.2023 | 05:00:00 | 12,5 |
| 15.05.2023 | 06:00:00 | 12,5 |
| 15.05.2023 | 07:00:00 | 12,5 |
| 15.05.2023 | 08:00:00 | 12,5 |
| 15.05.2023 | 09:00:00 | 12,6 |
| 15.05.2023 | 10:00:00 | 12,7 |
| 15.05.2023 | 11:00:00 | 12,7 |
| 15.05.2023 | 12:00:00 | 12,7 |
| 15.05.2023 | 13:00:00 | 12,8 |
| 15.05.2023 | 14:00:00 | 12,7 |
| 15.05.2023 | 15:00:00 | 12,8 |
| 15.05.2023 | 16:00:00 | 12,8 |
| 15.05.2023 | 17:00:00 | 12,7 |
| 15.05.2023 | 18:00:00 | 12,7 |
| 15.05.2023 | 19:00:00 | 12,6 |
| 15.05.2023 | 20:00:00 | 12,6 |
| 15.05.2023 | 21:00:00 | 12,5 |
| 15.05.2023 | 22:00:00 | 12,5 |
| 15.05.2023 | 23:00:00 | 12,5 |
| 16.05.2023 | 00:00:00 | 12,4 |
| 16.05.2023 | 01:00:00 | 12,4 |
| 16.05.2023 | 02:00:00 | 12,4 |
| 16.05.2023 | 03:00:00 | 12,4 |
| 16.05.2023 | 04:00:00 | 12,3 |
| 16.05.2023 | 05:00:00 | 12,3 |
| 16.05.2023 | 06:00:00 | 12,3 |
| 16.05.2023 | 07:00:00 | 12,4 |
| 16.05.2023 | 08:00:00 | 12,4 |
| 16.05.2023 | 09:00:00 | 12,4 |
| 16.05.2023 | 10:00:00 | 12,3 |
| 16.05.2023 | 11:00:00 | 12,3 |
| 16.05.2023 | 12:00:00 | 12,3 |
| 16.05.2023 | 13:00:00 | 12,3 |
| 16.05.2023 | 14:00:00 | 12,3 |
| 16.05.2023 | 15:00:00 | 12,3 |
| 16.05.2023 | 16:00:00 | 12,3 |
| 16.05.2023 | 17:00:00 | 12,2 |
| 16.05.2023 | 18:00:00 | 12,2 |
| 16.05.2023 | 19:00:00 | 12,2 |
| 16.05.2023 | 20:00:00 | 12,2 |

|            |          |      |
|------------|----------|------|
| 16.05.2023 | 21:00:00 | 12,2 |
| 16.05.2023 | 22:00:00 | 12,2 |
| 16.05.2023 | 23:00:00 | 12,1 |
| 17.05.2023 | 00:00:00 | 12,1 |
| 17.05.2023 | 01:00:00 | 12,1 |
| 17.05.2023 | 02:00:00 | 12,1 |
| 17.05.2023 | 03:00:00 | 12,1 |
| 17.05.2023 | 04:00:00 | 12,1 |
| 17.05.2023 | 05:00:00 | 12,1 |
| 17.05.2023 | 06:00:00 | 12,1 |
| 17.05.2023 | 07:00:00 | 12,1 |
| 17.05.2023 | 08:00:00 | 12,1 |
| 17.05.2023 | 09:00:00 | 12,1 |
| 17.05.2023 | 10:00:00 | 12,1 |
| 17.05.2023 | 11:00:00 | 12,1 |
| 17.05.2023 | 12:00:00 | 12,1 |
| 17.05.2023 | 13:00:00 | 12   |
| 17.05.2023 | 14:00:00 | 12   |
| 17.05.2023 | 15:00:00 | 12   |
| 17.05.2023 | 16:00:00 | 11,9 |
| 17.05.2023 | 17:00:00 | 11,9 |
| 17.05.2023 | 18:00:00 | 11,8 |
| 17.05.2023 | 19:00:00 | 11,8 |
| 17.05.2023 | 20:00:00 | 11,8 |
| 17.05.2023 | 21:00:00 | 11,8 |
| 17.05.2023 | 22:00:00 | 11,8 |
| 17.05.2023 | 23:00:00 | 11,7 |
| 18.05.2023 | 00:00:00 | 11,7 |
| 18.05.2023 | 01:00:00 | 11,7 |
| 18.05.2023 | 02:00:00 | 11,7 |
| 18.05.2023 | 03:00:00 | 11,7 |
| 18.05.2023 | 04:00:00 | 11,7 |
| 18.05.2023 | 05:00:00 | 11,6 |
| 18.05.2023 | 06:00:00 | 11,6 |
| 18.05.2023 | 07:00:00 | 11,5 |
| 18.05.2023 | 08:00:00 | 11,5 |
| 18.05.2023 | 09:00:00 | 11,5 |
| 18.05.2023 | 10:00:00 | 11,4 |
| 18.05.2023 | 11:00:00 | 11,4 |
| 18.05.2023 | 12:00:00 | 11,4 |
| 18.05.2023 | 13:00:00 | 11,4 |
| 18.05.2023 | 14:00:00 | 11,4 |
| 18.05.2023 | 15:00:00 | 11,4 |
| 18.05.2023 | 16:00:00 | 11,3 |
| 18.05.2023 | 17:00:00 | 11,3 |
| 18.05.2023 | 18:00:00 | 11,3 |

|            |          |      |
|------------|----------|------|
| 18.05.2023 | 19:00:00 | 11,3 |
| 18.05.2023 | 20:00:00 | 11,3 |
| 18.05.2023 | 21:00:00 | 11,2 |
| 18.05.2023 | 22:00:00 | 11,2 |
| 18.05.2023 | 23:00:00 | 11,2 |
| 19.05.2023 | 00:00:00 | 11,2 |
| 19.05.2023 | 01:00:00 | 11,2 |
| 19.05.2023 | 02:00:00 | 11,2 |
| 19.05.2023 | 03:00:00 | 11,2 |
| 19.05.2023 | 04:00:00 | 11,2 |
| 19.05.2023 | 05:00:00 | 11,2 |
| 19.05.2023 | 06:00:00 | 11,2 |
| 19.05.2023 | 07:00:00 | 11,3 |
| 19.05.2023 | 08:00:00 | 11,3 |
| 19.05.2023 | 09:00:00 | 11,3 |
| 19.05.2023 | 10:00:00 | 11,4 |
| 19.05.2023 | 11:00:00 | 11,4 |
| 19.05.2023 | 12:00:00 | 11,5 |
| 19.05.2023 | 13:00:00 | 11,6 |
| 19.05.2023 | 14:00:00 | 11,6 |
| 19.05.2023 | 15:00:00 | 11,6 |
| 19.05.2023 | 16:00:00 | 11,7 |
| 19.05.2023 | 17:00:00 | 11,7 |
| 19.05.2023 | 18:00:00 | 11,7 |
| 19.05.2023 | 19:00:00 | 11,7 |
| 19.05.2023 | 20:00:00 | 11,6 |
| 19.05.2023 | 21:00:00 | 11,6 |
| 19.05.2023 | 22:00:00 | 11,6 |
| 19.05.2023 | 23:00:00 | 11,5 |
| 20.05.2023 | 00:00:00 | 11,5 |
| 20.05.2023 | 01:00:00 | 11,5 |
| 20.05.2023 | 02:00:00 | 11,5 |
| 20.05.2023 | 03:00:00 | 11,4 |
| 20.05.2023 | 04:00:00 | 11,4 |
| 20.05.2023 | 05:00:00 | 11,4 |
| 20.05.2023 | 06:00:00 | 11,4 |
| 20.05.2023 | 07:00:00 | 11,5 |
| 20.05.2023 | 08:00:00 | 11,6 |
| 20.05.2023 | 09:00:00 | 11,7 |
| 20.05.2023 | 10:00:00 | 11,8 |
| 20.05.2023 | 11:00:00 | 11,9 |
| 20.05.2023 | 12:00:00 | 12,1 |
| 20.05.2023 | 13:00:00 | 12,2 |
| 20.05.2023 | 14:00:00 | 12,2 |
| 20.05.2023 | 15:00:00 | 12,3 |
| 20.05.2023 | 16:00:00 | 12,3 |



|            |          |      |
|------------|----------|------|
| 20.05.2023 | 17:00:00 | 12,3 |
| 20.05.2023 | 18:00:00 | 12,3 |
| 20.05.2023 | 19:00:00 | 12,3 |
| 20.05.2023 | 20:00:00 | 12,3 |
| 20.05.2023 | 21:00:00 | 12,2 |
| 20.05.2023 | 22:00:00 | 12,2 |
| 20.05.2023 | 23:00:00 | 12,2 |
| 21.05.2023 | 00:00:00 | 12,2 |
| 21.05.2023 | 01:00:00 | 12,2 |
| 21.05.2023 | 02:00:00 | 12,2 |
| 21.05.2023 | 03:00:00 | 12,2 |
| 21.05.2023 | 04:00:00 | 12,2 |
| 21.05.2023 | 05:00:00 | 12,3 |
| 21.05.2023 | 06:00:00 | 12,3 |
| 21.05.2023 | 07:00:00 | 12,4 |
| 21.05.2023 | 08:00:00 | 12,5 |
| 21.05.2023 | 09:00:00 | 12,7 |
| 21.05.2023 | 10:00:00 | 12,9 |
| 21.05.2023 | 11:00:00 | 13   |
| 21.05.2023 | 12:00:00 | 13,1 |
| 21.05.2023 | 13:00:00 | 13,2 |
| 21.05.2023 | 14:00:00 | 13,3 |
| 21.05.2023 | 15:00:00 | 13,2 |
| 21.05.2023 | 16:00:00 | 13,2 |
| 21.05.2023 | 17:00:00 | 13,2 |
| 21.05.2023 | 18:00:00 | 13,2 |
| 21.05.2023 | 19:00:00 | 13,1 |
| 21.05.2023 | 20:00:00 | 13,1 |
| 21.05.2023 | 21:00:00 | 13,1 |
| 21.05.2023 | 22:00:00 | 13,1 |
| 21.05.2023 | 23:00:00 | 13   |
| 22.05.2023 | 00:00:00 | 13   |
| 22.05.2023 | 01:00:00 | 13   |
| 22.05.2023 | 02:00:00 | 13   |
| 22.05.2023 | 03:00:00 | 13   |
| 22.05.2023 | 04:00:00 | 13   |
| 22.05.2023 | 05:00:00 | 13   |
| 22.05.2023 | 06:00:00 | 13,1 |
| 22.05.2023 | 07:00:00 | 13,1 |
| 22.05.2023 | 08:00:00 | 13,2 |
| 22.05.2023 | 09:00:00 | 13,4 |
| 22.05.2023 | 10:00:00 | 13,5 |
| 22.05.2023 | 11:00:00 | 13,7 |
| 22.05.2023 | 12:00:00 | 13,8 |
| 22.05.2023 | 13:00:00 | 13,9 |
| 22.05.2023 | 14:00:00 | 13,9 |

|            |          |      |
|------------|----------|------|
| 22.05.2023 | 15:00:00 | 14   |
| 22.05.2023 | 16:00:00 | 13,9 |
| 22.05.2023 | 17:00:00 | 13,9 |
| 22.05.2023 | 18:00:00 | 13,8 |
| 22.05.2023 | 19:00:00 | 13,8 |
| 22.05.2023 | 20:00:00 | 13,7 |
| 22.05.2023 | 21:00:00 | 13,7 |
| 22.05.2023 | 22:00:00 | 13,6 |
| 22.05.2023 | 23:00:00 | 13,6 |
| 23.05.2023 | 00:00:00 | 13,6 |
| 23.05.2023 | 01:00:00 | 13,6 |
| 23.05.2023 | 02:00:00 | 13,6 |
| 23.05.2023 | 03:00:00 | 13,6 |
| 23.05.2023 | 04:00:00 | 13,6 |
| 23.05.2023 | 05:00:00 | 13,6 |
| 23.05.2023 | 06:00:00 | 13,6 |
| 23.05.2023 | 07:00:00 | 13,7 |
| 23.05.2023 | 08:00:00 | 13,8 |
| 23.05.2023 | 09:00:00 | 14   |
| 23.05.2023 | 10:00:00 | 14,1 |
| 23.05.2023 | 11:00:00 | 14,3 |
| 23.05.2023 | 12:00:00 | 14,4 |
| 23.05.2023 | 13:00:00 | 14,5 |
| 23.05.2023 | 14:00:00 | 14,5 |
| 23.05.2023 | 15:00:00 | 14,5 |
| 23.05.2023 | 16:00:00 | 14,4 |
| 23.05.2023 | 17:00:00 | 14,4 |
| 23.05.2023 | 18:00:00 | 14,3 |
| 23.05.2023 | 19:00:00 | 14,3 |
| 23.05.2023 | 20:00:00 | 14,2 |
| 23.05.2023 | 21:00:00 | 14,2 |
| 23.05.2023 | 22:00:00 | 14,2 |
| 23.05.2023 | 23:00:00 | 14,2 |
| 24.05.2023 | 00:00:00 | 14,1 |
| 24.05.2023 | 01:00:00 | 14,1 |
| 24.05.2023 | 02:00:00 | 14,1 |
| 24.05.2023 | 03:00:00 | 14,1 |
| 24.05.2023 | 04:00:00 | 14,1 |
| 24.05.2023 | 05:00:00 | 14,1 |
| 24.05.2023 | 06:00:00 | 14,1 |
| 24.05.2023 | 07:00:00 | 14,2 |
| 24.05.2023 | 08:00:00 | 14,3 |
| 24.05.2023 | 09:00:00 | 14,4 |
| 24.05.2023 | 10:00:00 | 14,5 |
| 24.05.2023 | 11:00:00 | 14,6 |
| 24.05.2023 | 12:00:00 | 14,6 |

|            |          |      |
|------------|----------|------|
| 24.05.2023 | 13:00:00 | 14,8 |
| 24.05.2023 | 14:00:00 | 14,8 |
| 24.05.2023 | 15:00:00 | 14,8 |
| 24.05.2023 | 16:00:00 | 14,8 |
| 24.05.2023 | 17:00:00 | 14,8 |
| 24.05.2023 | 18:00:00 | 14,7 |
| 24.05.2023 | 19:00:00 | 14,7 |
| 24.05.2023 | 20:00:00 | 14,7 |
| 24.05.2023 | 21:00:00 | 14,6 |
| 24.05.2023 | 22:00:00 | 14,6 |
| 24.05.2023 | 23:00:00 | 14,6 |
| 25.05.2023 | 00:00:00 | 14,5 |
| 25.05.2023 | 01:00:00 | 14,5 |
| 25.05.2023 | 02:00:00 | 14,5 |
| 25.05.2023 | 03:00:00 | 14,4 |
| 25.05.2023 | 04:00:00 | 14,4 |
| 25.05.2023 | 05:00:00 | 14,4 |
| 25.05.2023 | 06:00:00 | 14,4 |
| 25.05.2023 | 07:00:00 | 14,5 |
| 25.05.2023 | 08:00:00 | 14,6 |
| 25.05.2023 | 09:00:00 | 14,7 |
| 25.05.2023 | 10:00:00 | 14,8 |
| 25.05.2023 | 11:00:00 | 14,9 |
| 25.05.2023 | 12:00:00 | 15   |
| 25.05.2023 | 13:00:00 | 15,1 |
| 25.05.2023 | 14:00:00 | 15,1 |
| 25.05.2023 | 15:00:00 | 15,1 |
| 25.05.2023 | 16:00:00 | 15,2 |
| 25.05.2023 | 17:00:00 | 15,1 |
| 25.05.2023 | 18:00:00 | 15,1 |
| 25.05.2023 | 19:00:00 | 15   |
| 25.05.2023 | 20:00:00 | 15   |
| 25.05.2023 | 21:00:00 | 15   |
| 25.05.2023 | 22:00:00 | 15   |
| 25.05.2023 | 23:00:00 | 14,9 |
| 26.05.2023 | 00:00:00 | 14,9 |
| 26.05.2023 | 01:00:00 | 14,9 |
| 26.05.2023 | 02:00:00 | 14,9 |
| 26.05.2023 | 03:00:00 | 14,9 |
| 26.05.2023 | 04:00:00 | 14,9 |
| 26.05.2023 | 05:00:00 | 14,9 |
| 26.05.2023 | 06:00:00 | 15   |
| 26.05.2023 | 07:00:00 | 15   |
| 26.05.2023 | 08:00:00 | 15,1 |
| 26.05.2023 | 09:00:00 | 15,3 |
| 26.05.2023 | 10:00:00 | 15,4 |

|            |          |      |
|------------|----------|------|
| 26.05.2023 | 11:00:00 | 15,5 |
| 26.05.2023 | 12:00:00 | 15,6 |
| 26.05.2023 | 13:00:00 | 15,7 |
| 26.05.2023 | 14:00:00 | 15,7 |
| 26.05.2023 | 15:00:00 | 15,6 |
| 26.05.2023 | 16:00:00 | 15,6 |
| 26.05.2023 | 17:00:00 | 15,5 |
| 26.05.2023 | 18:00:00 | 15,5 |
| 26.05.2023 | 19:00:00 | 15,5 |
| 26.05.2023 | 20:00:00 | 15,4 |
| 26.05.2023 | 21:00:00 | 15,4 |
| 26.05.2023 | 22:00:00 | 15,4 |
| 26.05.2023 | 23:00:00 | 15,3 |
| 27.05.2023 | 00:00:00 | 15,3 |
| 27.05.2023 | 01:00:00 | 15,3 |
| 27.05.2023 | 02:00:00 | 15,3 |
| 27.05.2023 | 03:00:00 | 15,3 |
| 27.05.2023 | 04:00:00 | 15,3 |
| 27.05.2023 | 05:00:00 | 15,3 |
| 27.05.2023 | 06:00:00 | 15,3 |
| 27.05.2023 | 07:00:00 | 15,3 |
| 27.05.2023 | 08:00:00 | 15,4 |
| 27.05.2023 | 09:00:00 | 15,5 |
| 27.05.2023 | 10:00:00 | 15,7 |
| 27.05.2023 | 11:00:00 | 15,8 |
| 27.05.2023 | 12:00:00 | 15,9 |
| 27.05.2023 | 13:00:00 | 16   |
| 27.05.2023 | 14:00:00 | 16   |
| 27.05.2023 | 15:00:00 | 16   |
| 27.05.2023 | 16:00:00 | 16   |
| 27.05.2023 | 17:00:00 | 15,9 |
| 27.05.2023 | 18:00:00 | 15,8 |
| 27.05.2023 | 19:00:00 | 15,8 |
| 27.05.2023 | 20:00:00 | 15,7 |
| 27.05.2023 | 21:00:00 | 15,6 |
| 27.05.2023 | 22:00:00 | 15,6 |
| 27.05.2023 | 23:00:00 | 15,5 |
| 28.05.2023 | 00:00:00 | 15,4 |
| 28.05.2023 | 01:00:00 | 15,4 |
| 28.05.2023 | 02:00:00 | 15,3 |
| 28.05.2023 | 03:00:00 | 15,2 |
| 28.05.2023 | 04:00:00 | 15,2 |
| 28.05.2023 | 05:00:00 | 15,1 |
| 28.05.2023 | 06:00:00 | 15,1 |
| 28.05.2023 | 07:00:00 | 15,1 |
| 28.05.2023 | 08:00:00 | 15,2 |

|            |          |      |
|------------|----------|------|
| 28.05.2023 | 09:00:00 | 15,3 |
| 28.05.2023 | 10:00:00 | 15,4 |
| 28.05.2023 | 11:00:00 | 15,6 |
| 28.05.2023 | 12:00:00 | 15,7 |
| 28.05.2023 | 13:00:00 | 15,8 |
| 28.05.2023 | 14:00:00 | 15,8 |
| 28.05.2023 | 15:00:00 | 15,8 |
| 28.05.2023 | 16:00:00 | 15,8 |
| 28.05.2023 | 17:00:00 | 15,8 |
| 28.05.2023 | 18:00:00 | 15,7 |
| 28.05.2023 | 19:00:00 | 15,6 |
| 28.05.2023 | 20:00:00 | 15,5 |
| 28.05.2023 | 21:00:00 | 15,4 |
| 28.05.2023 | 22:00:00 | 15,3 |
| 28.05.2023 | 23:00:00 | 15,3 |
| 29.05.2023 | 00:00:00 | 15,2 |
| 29.05.2023 | 01:00:00 | 15,2 |
| 29.05.2023 | 02:00:00 | 15,1 |
| 29.05.2023 | 03:00:00 | 15,1 |
| 29.05.2023 | 04:00:00 | 15   |
| 29.05.2023 | 05:00:00 | 15   |
| 29.05.2023 | 06:00:00 | 14,9 |
| 29.05.2023 | 07:00:00 | 15   |
| 29.05.2023 | 08:00:00 | 15   |
| 29.05.2023 | 09:00:00 | 15,1 |
| 29.05.2023 | 10:00:00 | 15,2 |
| 29.05.2023 | 11:00:00 | 15,4 |
| 29.05.2023 | 12:00:00 | 15,6 |
| 29.05.2023 | 13:00:00 | 15,7 |
| 29.05.2023 | 14:00:00 | 15,8 |
| 29.05.2023 | 15:00:00 | 15,8 |
| 29.05.2023 | 16:00:00 | 15,9 |
| 29.05.2023 | 17:00:00 | 15,8 |
| 29.05.2023 | 18:00:00 | 15,8 |
| 29.05.2023 | 19:00:00 | 15,7 |
| 29.05.2023 | 20:00:00 | 15,7 |
| 29.05.2023 | 21:00:00 | 15,6 |
| 29.05.2023 | 22:00:00 | 15,5 |
| 29.05.2023 | 23:00:00 | 15,5 |
| 30.05.2023 | 00:00:00 | 15,4 |
| 30.05.2023 | 01:00:00 | 15,4 |
| 30.05.2023 | 02:00:00 | 15,4 |
| 30.05.2023 | 03:00:00 | 15,3 |
| 30.05.2023 | 04:00:00 | 15,3 |
| 30.05.2023 | 05:00:00 | 15,3 |
| 30.05.2023 | 06:00:00 | 15,3 |

|            |          |      |
|------------|----------|------|
| 30.05.2023 | 07:00:00 | 15,3 |
| 30.05.2023 | 08:00:00 | 15,4 |
| 30.05.2023 | 09:00:00 | 15,5 |
| 30.05.2023 | 10:00:00 | 15,6 |
| 30.05.2023 | 11:00:00 | 15,8 |
| 30.05.2023 | 12:00:00 | 15,9 |
| 30.05.2023 | 13:00:00 | 16,1 |
| 30.05.2023 | 14:00:00 | 16,2 |
| 30.05.2023 | 15:00:00 | 16,2 |
| 30.05.2023 | 16:00:00 | 16,3 |
| 30.05.2023 | 17:00:00 | 16,3 |
| 30.05.2023 | 18:00:00 | 16,2 |
| 30.05.2023 | 19:00:00 | 16,1 |
| 30.05.2023 | 20:00:00 | 16,1 |
| 30.05.2023 | 21:00:00 | 16   |
| 30.05.2023 | 22:00:00 | 15,9 |
| 30.05.2023 | 23:00:00 | 15,8 |
| 31.05.2023 | 00:00:00 | 15,8 |
| 31.05.2023 | 01:00:00 | 15,7 |
| 31.05.2023 | 02:00:00 | 15,7 |
| 31.05.2023 | 03:00:00 | 15,6 |
| 31.05.2023 | 04:00:00 | 15,6 |
| 31.05.2023 | 05:00:00 | 15,5 |
| 31.05.2023 | 06:00:00 | 15,5 |
| 31.05.2023 | 07:00:00 | 15,5 |
| 31.05.2023 | 08:00:00 | 15,6 |
| 31.05.2023 | 09:00:00 | 15,7 |
| 31.05.2023 | 10:00:00 | 15,8 |
| 31.05.2023 | 11:00:00 | 16   |
| 31.05.2023 | 12:00:00 | 16,2 |
| 31.05.2023 | 13:00:00 | 16,3 |
| 31.05.2023 | 14:00:00 | 16,4 |
| 31.05.2023 | 15:00:00 | 16,5 |
| 31.05.2023 | 16:00:00 | 16,5 |
| 31.05.2023 | 17:00:00 | 16,5 |
| 31.05.2023 | 18:00:00 | 16,5 |
| 31.05.2023 | 19:00:00 | 16,5 |
| 31.05.2023 | 20:00:00 | 16,4 |
| 31.05.2023 | 21:00:00 | 16,3 |
| 31.05.2023 | 22:00:00 | 16,3 |
| 31.05.2023 | 23:00:00 | 16,2 |

**Table S2:** Daily temperature range from the gauging station Wien-Nussdorf in the years 2017 to 2023 for the period from incubation until hatching for each family.

| ID | Year | Origin | Average daily temperature range<br>[°C] | ±SD  | Min<br>[°C] | Max<br>[°C] |
|----|------|--------|-----------------------------------------|------|-------------|-------------|
| 1  | 2017 | DE     |                                         |      |             |             |
| 2  | 2018 | HU     | 0,72                                    | 0,23 | 0,4         | 1,1         |
| 3  | 2018 | AT     | 0,69                                    | 0,18 | 0,4         | 0,9         |
| 4  | 2018 | AT     | 0,64                                    | 0,14 | 0,5         | 0,9         |
| 5  | 2019 | HU     | 0,46                                    | 0,12 | 0,3         | 0,6         |
| 6  | 2019 | AT     | 0,69                                    | 0,18 | 0,3         | 0,9         |
| 7  | 2019 | AT     | 0,59                                    | 0,17 | 0,3         | 0,9         |
| 8  | 2019 | DE     |                                         |      |             |             |
| 9  | 2020 | HU     | 1,13                                    | 0,27 | 0,7         | 1,4         |
| 10 | 2020 | AT     | 0,86                                    | 0,19 | 0,6         | 1,2         |
| 11 | 2020 | AT     | 0,65                                    | 0,19 | 0,3         | 0,9         |
| 12 | 2021 | HU     | 0,62                                    | 0,21 | 0,4         | 1,0         |
| 13 | 2021 | AT     | 1,09                                    | 0,33 | 0,5         | 1,5         |
| 14 | 2022 | AT     | 0,56                                    | 0,26 | 0,2         | 1,0         |
| 15 | 2023 | HU     | 0,55                                    | 0,19 | 0,2         | 0,8         |
| 16 | 2023 | AT     | 0,61                                    | 0,17 | 0,4         | 1,0         |

**Table S3:** Daily temperature range from the gauging station Wien-Nussdorf in the years 2017 to 2023 for the period from hatching until feeding for each family.

| ID | Year | Origin | Average daily temperature range<br>[°C] | ±SD  | Min<br>[°C] | Max<br>[°C] |
|----|------|--------|-----------------------------------------|------|-------------|-------------|
| 1  | 2017 | DE     | 0,60                                    | 0,19 | 0,2         | 0,9         |
| 2  | 2018 | HU     | 0,73                                    | 0,20 | 0,4         | 1,1         |
| 3  | 2018 | AT     | 0,67                                    | 0,14 | 0,4         | 0,9         |
| 4  | 2018 | AT     | 0,70                                    | 0,13 | 0,5         | 0,9         |
| 5  | 2019 | HU     | 0,64                                    | 0,22 | 0,2         | 1,0         |
| 6  | 2019 | AT     | 0,61                                    | 0,22 | 0,2         | 1,0         |
| 7  | 2019 | AT     | 0,59                                    | 0,26 | 0,2         | 1,0         |
| 8  | 2019 | DE     | 0,63                                    | 0,30 | 0,2         | 1,1         |
| 9  | 2020 | HU     | 0,97                                    | 0,23 | 0,6         | 1,4         |
| 10 | 2020 | AT     | 0,77                                    | 0,22 | 0,3         | 1,1         |
| 11 | 2020 | AT     | 0,70                                    | 0,23 | 0,3         | 1,0         |
| 12 | 2021 | HU     | 1,00                                    | 0,38 | 0,4         | 1,6         |
| 13 | 2021 | AT     | 0,56                                    | 0,17 | 0,2         | 0,8         |
| 14 | 2022 | AT     | 0,66                                    | 0,28 | 0,2         | 1,0         |
| 15 | 2023 | HU     | 0,59                                    | 0,19 | 0,3         | 1,0         |
| 16 | 2023 | AT     | 0,50                                    | 0,20 | 0,2         | 0,8         |

**Table S4:** Temperature values measured in the hatchery

| Day   | Year |      |       |       |      |      |      |
|-------|------|------|-------|-------|------|------|------|
|       | 2017 | 2018 | 2019  | 2020  | 2021 | 2022 | 2023 |
| 11.4. | -    | -    | -     | -     | 10,3 | -    | -    |
| 12.4. | -    | -    | 10,60 | 12,20 | 10,6 | -    | -    |
| 13.4. | -    | 13,4 | 9,80  | 12,80 | 9,8  | -    | -    |
| 14.4. | 12,2 | 13,5 | 10,10 | 11,80 | 9,5  | -    | -    |
| 15.4. | 12,5 | 13,1 | 10,80 | 12,00 | 9,5  | -    | 10   |
| 16.4. | 12,4 | 13,0 | 9,80  | 13,10 | 8,7  | -    | 8,2  |
| 17.4. | 12,9 | 13,1 | 10,00 | 13,30 | 9,5  | -    | 8,3  |
| 18.4. | 12,7 | 13,1 | 10,40 | 13,40 | 9,6  | -    | 8,5  |
| 19.4. | 11,5 | 13,7 | 11,20 | 13,70 | 9,9  | -    | 8,7  |
| 20.4. | 10,8 | 14,4 | 11,30 | 13,20 | 9,4  | -    | 9,1  |
| 21.4. | 10,8 | 14,0 | 11,50 | 13,00 | 11,2 | -    | 9    |
| 22.4. | 10,9 | 15,0 | 12,10 | 13,10 | 10,5 | -    | 10   |
| 23.4. | 10,8 | 15,2 | 12,00 | 13,10 | 10,4 | -    | 11,2 |
| 24.4. | 10,4 | 15,0 | 11,80 | 13,30 | 10,3 | -    | 10,5 |
| 25.4. | 10,8 | 16,0 | 12,20 | 14,00 | 10,5 | 11,3 | 10,9 |
| 26.4. | 10,9 | 15,2 | 12,70 | 13,70 | 11,1 | 11,8 | 10,5 |
| 27.4. | 10,5 | 15,1 | 12,50 | 13,50 | 12   | 11,4 | 11   |
| 28.4. | 10,3 | 14,6 | 12,10 | 13,70 | 12,5 | 12   | 11   |
| 29.4. | 10   | 15,2 | 11,80 | 14,20 | 12,5 | 11,5 | 11,5 |
| 30.4. | 10,4 | 15,8 | 11,60 | 14,20 | 13,6 | 12,7 | 11,7 |
| 1.5.  | 10,4 | 15,2 | 11,20 | 14,50 | 14,2 | 12,5 | 12,5 |
| 2.5.  | 10,5 | 15,5 | 11,00 | 14,80 | 14,1 | 12,5 | 12,3 |
| 3.5.  | 10,9 | 16,1 | 11,40 | 14,40 | 13,7 | 12,7 | 12,4 |
| 4.5.  | 11,3 | 15,9 | 11,50 | 14,60 | 13,6 | 13,4 | 12,5 |
| 5.5.  | 11,7 | 16,2 | 11,00 | 14,70 | 14,3 | 13,4 | 13,1 |
| 6.5.  | 12,2 | 15,9 | 10,40 | 13,80 | 13,6 | 14,1 | 13   |
| 7.5.  | 12,8 | 16,0 | 10,20 | 13,80 | 13,4 | 14,2 | 13   |
| 8.5.  | -    | 16,1 | 10,30 | 14,10 | 13,2 | 14,6 | 13,8 |
| 9.5.  | -    | 16,5 | 11,00 | 14,40 | 13,2 | 14,2 | 12,9 |
| 10.5. | -    | 16,5 | 11,00 | 15,20 | 14,4 | 14,6 | 13,2 |
| 11.5. | -    | 16,5 | 11,10 | 15,30 | 14,4 | 15   | 14   |
| 12.5. | -    | 16,8 | 11,20 | 14,20 | 14,7 | 15,2 | 13,3 |
| 13.5. | -    | 17,0 | 11,30 | 14,70 | 14,2 | 15,6 | 13,1 |
| 14.5. | -    | 17,5 | 10,90 | 14,70 | 14   | 15,5 | 12,4 |
| 15.5. | -    | -    | 10,70 | 14,20 | 14,1 | 16,1 | 12,4 |
| 16.5. | -    | -    | 10,40 | 14,20 | 13,8 | 16,2 | 12,1 |
| 17.5. | -    | -    | 10,70 | 14,30 | -    | -    | 11,9 |
| 18.5. | -    | -    | 11,00 | 14,90 | -    | -    | -    |
| 19.5. | -    | -    | 12,10 | 14,90 | -    | -    | -    |
| 20.5. | -    | -    | 12,20 | 15,00 | -    | -    | -    |
| 21.5. | -    | -    | 12,20 | 14,40 | -    | -    | -    |
| 22.5. | -    | -    | 12,50 | 15,20 | -    | -    | -    |
| 23.5. | -    | -    | 12,50 | 15,40 | -    | -    | -    |
| 24.5. | -    | -    | 11,50 | 15,80 | -    | -    | -    |
| 25.5. | -    | -    | 13,00 | 15,80 | -    | -    | -    |



|       |   |   |       |   |   |   |   |
|-------|---|---|-------|---|---|---|---|
| 26.5. | - | - | 13,20 | - | - | - | - |
| 27.5. | - | - | 13,60 | - | - | - | - |
| 28.5. | - | - | 13,70 | - | - | - | - |
